# Supplementary material for: Protein kinase TgCDPK7 regulates vesicular trafficking and phospholipid synthesis in Toxoplasma gondii
Source: PubMed Central journal article supplement (PMC7909640; doi:10.1371/journal.ppat.1009325), 2021-02-26
Supplement: ppat.1009325.s003.pdf [file ppat.1009325.s003.pdf]

**Supplemental Data Table S1: PCR Primers**

| Oligo                                | Forward (5'-3')                                                     | Reverse (5'-3')                                                       |
|--------------------------------------|---------------------------------------------------------------------|-----------------------------------------------------------------------|
| LIC-HXGPRT-TgCDPK7-3HA               | 415TACTTCCAATCCA<br>ATTTAATGCAACACT<br>CCGGTCTCTTTCGAC<br>GGCG      | 416<br>TCCTCCACTTCCAA<br>TTTTAGCCTTATGT<br>ACTTCCTCTATGCT<br>AGGTGAGG |
| TgPH+KD(CDPK7)pGE<br>X4T-1           | 101<br>GAC TAG GAT CCG<br>CGG CCA TCG ACG<br>GCG TTC                | 104<br>GTC AAG CGG CCG<br>CCT AGA TCC AAA<br>TGT GCT GGA GCG<br>CA    |
| 5'UTR forTgCDPK7-iKD                 | 90<br>GTA CGC CAT GGG<br>AGA CAC ACG CAG<br>ACT TAC TTC GTG         | 91<br>GTA CGG GAT CCC<br>GAC CTT GGA GAC<br>AGA GAA GAC               |
| 3'Coding sequence for<br>TgCDPK7-iKD | 123<br>TTCCTAGGGATATCA<br>AAA TGG GGG GCG<br>TCC AGT CGA CCC<br>GCG | 93<br>GTA GCA CTA GTG<br>GAA GGG AGG ACG<br>GAG ACT GGT CG            |
| 5'-integration for<br>TgCDPK7-iKD    | 105<br>GTGGAAAATGCCAA<br>GCAAATACTGCAG                              | 106<br>CCTGAGACGCGTGT<br>TCAAGCTTATC                                  |
| 3'-integration for<br>TgCDPK7-iKD    | 107<br>CTGATAGGGAGTGG<br>TAAACTCGAG                                 | 108<br>GCACTTGCGGCGGC<br>G GAGACACTC                                  |
| WT promoter TgCDPK7                  | 137<br>GGTTTCTCCCGTCTG<br>GCGAGGAAGGATTG<br>TGC                     | 138<br>CGCGGAGAAATCTG<br>CGGACACGCACCCG                               |
| DDmycTgRab11a                        | Rab11afDDFH2<br>CCATGCATGCGGCTA<br>AAGATGAATAC                      | Rab11arDDFH2<br>TCTTAATTAATCAG<br>GCGGAACAGCAGC<br>C                  |
| DDmycTgRab11a_S207A                  | Rab11afS207A<br>AGCGAACAGATGCA<br>C AAATACGGCAA                     | Rab11arS207A<br>TTGCCGTATTTGTG<br>CATCTGTTCGCT                        |
| DDmycTgRab11a_S207D                  | Rab11afS207D<br>AGCGAACAGATG<br>ACCAAATACGGCAA                      | Rab11arS207D<br>TTGCCGTATTTGGT<br>CATCTGTTCGCT                        |

|                                             |                                                                                                                                                                       |                                                                                                                                                                                                         |
|---------------------------------------------|-----------------------------------------------------------------------------------------------------------------------------------------------------------------------|---------------------------------------------------------------------------------------------------------------------------------------------------------------------------------------------------------|
| DDmycTgRab11a_T205A                         | Rab11afT205A<br>GAT GAG GAG CGA GCT<br>GAT AGC CAA ATA                                                                                                                | Rab11arT205A<br>TAT TTG GCT ATC<br>AGC TCG CTC CTC<br>ATC                                                                                                                                               |
| DDmycTgRab11b                               | Rab11bfDDFH2<br>GCGATGCATGGGGG<br>TTCTGAAGACTACG                                                                                                                      | Rab11brDDFH2<br>GCGTTAATTAACCA<br>CAGCAGGACAGATT<br>CTGAGGG                                                                                                                                             |
| PET28a- TgRab11a                            | TgRab11aF<br>CTGGATTCCGCGGCT<br>AAAGATGAATACTA<br>CG                                                                                                                  | TgRab11aR<br>CTGCGGCCGCTCA<br>GGC GGA ACA GCA<br>GCC                                                                                                                                                    |
| pGEX4T1-TgGPAT                              | TgGPAT_FP<br>CGGGATCCACGAAG<br>AACGAAGAAGATCC<br>G                                                                                                                    | TgGPAT_RP<br>AAGCGGCCGCTCGA<br>ACCGCTACTACTCG                                                                                                                                                           |
| Real Time PCR<br>TgCDPK7(182-292bp)         | 210<br>GTCCCGGACCCGGA<br>ATCGA                                                                                                                                        | 211<br>CACGCTTCCCGAGC<br>CTTTG                                                                                                                                                                          |
| Real Time PCR<br>TgCDPK7(5615-5729bp)       | AGTGAAGCCGCGAT<br>CGAC                                                                                                                                                | CGCCCTTTCGCCGG<br>TAGTA                                                                                                                                                                                 |
| Real Time PCR<br>TgCDPK3(43-153bp)          | 208<br>GGCGCAGCTGGAGA<br>AAAACC                                                                                                                                       | 209<br>GTGTCCGGGAGACCC<br>AGTTC                                                                                                                                                                         |
| TgGPAT-myc<br>oligos(endogenous<br>tagging) | GPAT-Myc F<br>GCCAGAGCTGCGCG<br>CGCACACACGAGGT<br>GAATCGCCTGCGAA<br>ACTACTTGCCGGCGA<br>GCAGAAGCTCATCTC<br>CGAGGAGGACCTGG<br>ATGAGATGCTGCAG<br>GCTTTTTCTCGAGTG<br>CCAT | GPAT-Myc R<br>ATG GCA CTC GAG<br>AAA AAG CCT GCA<br>GCA TCT CAT CCA<br>GGT CCT CCT CGG<br>AGA TGA GCT TCT<br>GCT CGC CGG CAA<br>GTA GTT TCG CAG<br>GCG ATT CAC CTC<br>GTG TGT GCG CGC<br>GCA GCT CTG GC |
| gRNA-GPAT                                   | gnaF<br>ATCGCCCGCAAAGCT<br>CCGTTTTAGAGCTAG<br>AAATAGC                                                                                                                 | 4883rev<br>AACTTGACATCCCC<br>ATTTAC                                                                                                                                                                     |
| S244A TgGPAT                                | GPAT244Af<br>ACACGAGGTGAAGC<br>GCCCGCAAAGCTC                                                                                                                          | GPAT244Ar<br>GAGCTTTGCGGGCG<br>CTTCACCTCGTGT                                                                                                                                                            |

|                                           |                                                 |                                              |
|-------------------------------------------|-------------------------------------------------|----------------------------------------------|
| S278A TgGPAT                              | GPAT278Af<br>AGCAAGAGTGCAGC<br>AGCGCCTCTCGGG    | GPAT278Ar<br>CCCGAGAGGCGCTG<br>CTGCACTCTTGCT |
| TgGPAT myc or ty tagged<br>overexpression | CAGAATCCCTTTT<br>CGACAAAATGTATTT<br>CCTTGTCCGGT | CAATGCATGGAGA<br>ATTCCTCTGC                  |
