# Supplementary material for: Protein kinase TgCDPK7 regulates vesicular trafficking and phospholipid synthesis in Toxoplasma gondii
Source: PubMed Central journal article supplement (PMC7909640; doi:10.1371/journal.ppat.1009325), 2021-02-26

**A**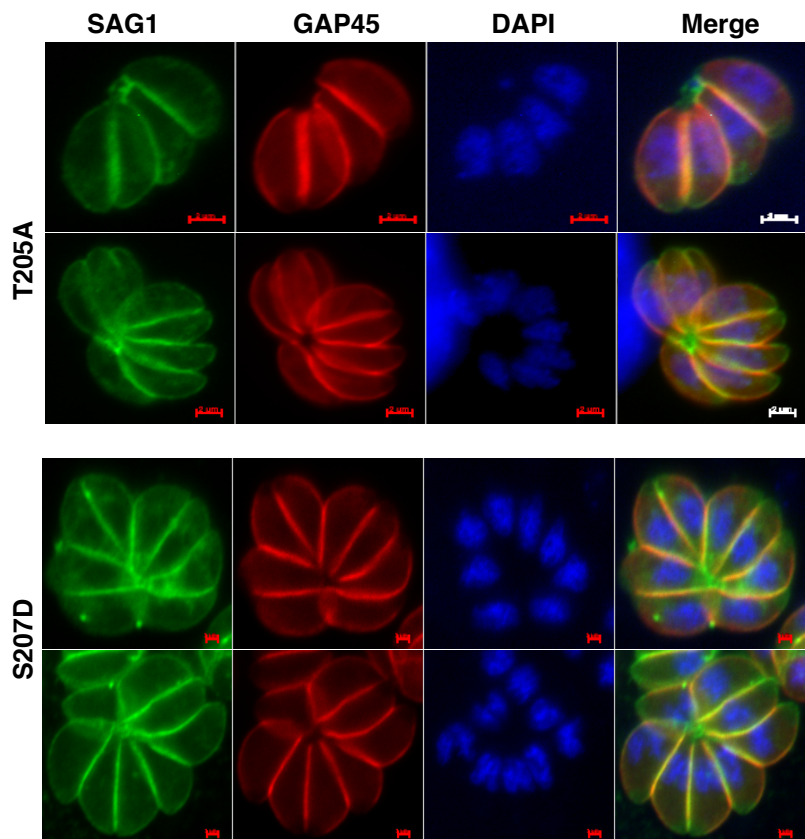**B**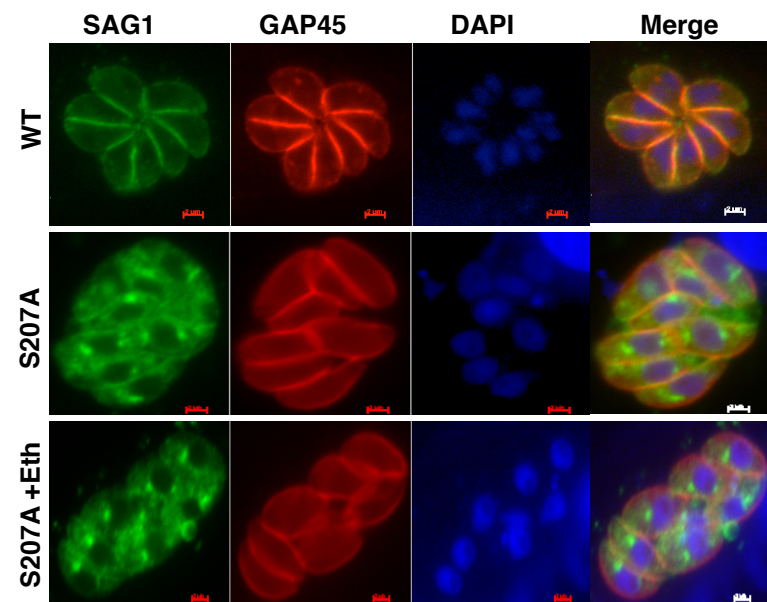

Supplement: ppat.1009325.s011.pdf [file ppat.1009325.s011.pdf]
