# Supplementary material for: Protein kinase TgCDPK7 regulates vesicular trafficking and phospholipid synthesis in Toxoplasma gondii
Source: PLoS Pathog. 2021 Feb 26;17(2):e1009325. doi: 10.1371/journal.ppat.1009325 (PMC7909640; doi:10.1371/journal.ppat.1009325)
Supplement: S1 Data — 1.1: List of phosphopeptides identified in the phosphoproteomic analysis of TgCDPK7 parasites. 1.2: List of hyposphosphorylated sites identified upon depletion of TgCDPK7. 1.3: List of hypersphosphorylated sites identified upon depletion of TgCDPK7. 1.4: Pathways enriched in hypophosphorylated T. gondii proteins. 1.5: Biological processes enriched in hypophosphorylated T. gondii proteins. 1.6: Protein-protein interaction analysis on the differentially phosphorylated T. gondii proteins. 1.7: TMT labeling details for the quantitative phosphoproteomic analysis of TgCDPK7 parasites. (XLSX) [file ppat.1009325.s002.xlsx]

## Sheet: Supp Data 1.1
Protein kinase TgCDPK7 regulates vesicular trafficking and phospholipid synthesis in Toxoplasma gondii			S1 Data: Phosphoproteomics related dataset
Supplementary Data 1.1: List of phosphopeptides identified in the phosphoproteomic analysis of TgCDPK7 parasites
Protein Description	Peptide_Sequence	Protein_pho;Spho;Site	BR1_Normalised (Fold change)	BR2_Normalised (Fold change)	BR3_Normalised (Fold change)	BR4_Normalised (Fold change)	BR5_Normalised (Fold change)	T-test p-value	T-test Difference
hypothetical protein	SFsPVSDSVDK	TGGT1_290310;S1732	NaN	NaN	0.61597	0.496366	0.265595	0.0466409	0.45931
endonuclease/exonuclease/phosphatase family protein	TAsSPGGAK	TGGT1_204410;S988	NaN	NaN	0.496809	0.472669	0.416858	0.00261462	0.462112
putative adenine nucleotide translocator	DFLAGGIsAGVSK	TGGT1_249900;S34	NaN	NaN	0.511054	0.394068	0.586884	0.0124785	0.497335
hypothetical protein	SYsGPIGR	TGGT1_235160;S488	NaN	NaN	0.492114	0.518809	0.504973	0.000232608	0.505299
cyclic nucleotide-binding domain-containing protein	GESAAsLESLFR	TGGT1_295850;S293	NaN	NaN	0.609965	0.48839	0.505553	0.00501101	0.534636
hypothetical protein	TQEAVKEtPKETPK	TGGT1_229640T907	NaN	0.646834	0.642587	0.552583	0.356209	0.0039608	0.549553
hypothetical protein	GCLVHSELRPSIILIHSGsDRDGSGK	TGGT1_202620;S219	NaN	0.594691	0.622553	0.480353	0.525557	0.0004305	0.555789
hypothetical protein	STAAGSQsPR	TGGT1_234470;S228	0.988828	NaN	0.504103	0.304688	0.433361	0.0335604	0.557745
hypothetical protein	AAsSSSIISSVFQDASDAR	TGGT1_306020;S674	NaN	NaN	0.524299	0.57206	0.581852	0.00100851	0.559404
ATP-binding domain-containing protein	GFsPADPCLR	TGGT1_202850;S563	NaN	NaN	0.567202	0.593996	0.548653	0.000532817	0.56995
hypothetical protein	FQLLPVFSAVVPGTATESEDGVAAVsR	TGGT1_290310;S1670	NaN	NaN	0.619297	0.760174	0.336862	0.0442086	0.572111
zinc finger (CCCH type) motif-containing protein	SRQDsLHAK	TGGT1_218300;S310	NaN	NaN	0.558261	0.567901	0.598302	0.000440299	0.574821
hypothetical protein	LDsLLQAANALDR	TGGT1_254870;S312	NaN	NaN	0.593172	0.516017	0.616991	0.00279323	0.575393
glutaminyl-tRNA synthetase (GlnRS)	GKsGEMVGQGAGVASEAVDGPDATTSVNFLK	TGGT1_217460;S231	NaN	NaN	0.600851	0.553086	0.573279	0.000577634	0.575739
glycerol-3-phosphate-acyltransferase	AHTRGEsPAK	TGGT1_256980;S244	NaN	NaN	0.555011	0.45387	0.72315	0.0180042	0.577344
cyclic nucleotide-binding domain-containing protein	DVQPSsPPPEKAPGK	TGGT1_295850;S1579	NaN	NaN	0.663312	0.479254	0.592181	0.00847908	0.578249
WD domain, G-beta repeat-containing protein	AAPHAEsRDEMDLHR	TGGT1_213060;S1381	NaN	NaN	0.667752	0.649351	0.444237	0.0145627	0.587113
tetratricopeptide repeat-containing protein	DTNTHVILPAAPPADLAVsPSR	TGGT1_255340;S47	NaN	NaN	0.566586	0.683294	0.512095	0.00731125	0.587325
hypothetical protein	VDsLPSLVR	TGGT1_205130;S4309	NaN	0.302237	0.741307	0.70989	0.612878	0.00971527	0.591578
putative transmembrane protein	LTPEELsQHSQR	TGGT1_410360;S252	NaN	0.317072	0.471541	0.791541	0.786577	0.0153585	0.591683
protein disulfide isomerase	sFVWLDTDQFK	TGGT1_211680;S274	NaN	NaN	0.529297	0.48345	0.768247	0.0214094	0.593665
hypothetical protein	TFSLAsDSTDVLR	TGGT1_254870;S328	NaN	NaN	0.554765	0.533426	0.698344	0.00747681	0.595512
DEAD/DEAH box helicase domain-containing protein	GKDsDSGR	TGGT1_284050;S1140	NaN	NaN	0.590568	0.581034	0.629852	0.000618383	0.600485
DnaJ domain-containing protein	SsPHSAK	TGGT1_203380;S179	NaN	NaN	0.508571	0.509601	0.784404	0.0225427	0.600859
putative translation initiation factor IF-2	RGGLsSDEEFEAK	TGGT1_214270;S17	NaN	NaN	0.81374	0.60697	0.389247	0.038873	0.603319
hypothetical protein	DESDRGPQQLsPSHQK	TGGT1_233160;S60	NaN	0.288611	0.759269	0.764331	0.616402	0.0121868	0.607153
MIZ/SP-RING zinc finger domain-containing protein	TVAsPQVSTTASASQSAVPPVLTLTLFSDDIAGR	TGGT1_244910;S1170	NaN	NaN	0.823261	0.612009	0.398734	0.0379152	0.611335
histone arginine methyltransferase PRMT5	GRAsQDDDEHRPGAAAEK	TGGT1_215560;S384	NaN	NaN	0.52926	0.563896	0.745335	0.0117435	0.61283
hypothetical protein	RRGsQTTQTETR	TGGT1_297210;S2549	NaN	NaN	0.737864	0.616071	0.489752	0.0133134	0.614562
phosphatidylinositol 3- and 4-kinase	ASsGKETR	TGGT1_276170;S602	NaN	NaN	0.624011	0.548223	0.682266	0.00391749	0.618167
cholinephosphate cytidylyltransferase	VTLtDRPLGVNFDESVEK	TGGT1_216930T258	NaN	NaN	0.762626	0.615883	0.490294	0.0155868	0.622934
hypothetical protein	SGVAFSGSVYsGDK	TGGT1_306020;S4991	NaN	NaN	0.651402	0.854996	0.364827	0.0482278	0.623742
putative cell-cycle-associated protein kinase CDK	SLLFGVSLGsPVLGESR	TGGT1_249260;S1741	NaN	NaN	0.670302	0.616667	0.587457	0.00150411	0.624809
helicase associated domain (ha2) protein	RIEGTGtPR	TGGT1_318440T1977	0.43005	NaN	0.644695	0.752277	0.672853	0.00282447	0.624969
hypothetical protein	ESGSAASPEKPANPEPAVPAAPVEKKEsAVEQK	TGGT1_310420;S41	0.754747	NaN	0.635567	0.440991	0.668986	0.00252816	0.625073
Sec7 domain-containing protein	RPAGGAEAPsGDLGSAFVANLQALK	TGGT1_232190;S2573	NaN	NaN	0.578811	0.519149	0.778212	0.0153268	0.625391
hypothetical protein	AWWERPSAsPIR	TGGT1_287170;S165	NaN	NaN	0.492234	0.590789	0.796621	0.0198739	0.626548
hypothetical protein	HQsPEARPSR	TGGT1_261430;S805	NaN	NaN	0.593173	0.567482	0.719947	0.00560436	0.626867
regulator of chromosome condensation (RCC1) repeat-containing protein	RPAsPEEAFGWKPVLLR	TGGT1_313860;S1081	NaN	NaN	0.715084	0.627892	0.540524	0.0063804	0.627833
hypothetical protein	GLLPGPsRQPEQR	TGGT1_220240;S456	NaN	0.292978	0.756586	0.628103	0.845701	0.0137674	0.630842
arginine decarboxylase	LAEMTAALsVATEEEFSGDREQTHGWLTK	TGGT1_280700;S163	NaN	NaN	0.755843	0.780105	0.360262	0.0433612	0.63207
tetratricopeptide repeat-containing protein	EKEEKsGDEEHLLTEAEFLAFK	TGGT1_247000;S708	NaN	NaN	0.845328	0.681818	0.371543	0.0449678	0.632896
cyclic nucleotide-binding domain-containing protein	GVRDEPGENEsDLWR	TGGT1_295850;S384	NaN	NaN	0.733769	0.661591	0.505553	0.0111087	0.633638
mago binding protein	KHGEKtPEEK	TGGT1_311750T141	NaN	NaN	0.769014	0.672766	0.46103	0.0199557	0.63427
hypothetical protein	GTSVAsGTSGNAQGAAASK	TGGT1_307810;S71	NaN	NaN	0.663913	0.586724	0.655577	0.00147847	0.635405
ubiquitin family protein	ADtPNSLGSPTATSSGEDKK	TGGT1_304680T429	1.03151	NaN	0.53429	0.531082	0.456902	0.0169368	0.638447
dense granule protein GRA6	SEARGPsLEER	TGGT1_275440;S118	NaN	0.478926	0.612884	0.549476	0.921881	0.00718863	0.640792
hypothetical protein	RPVsPQGRPGR	TGGT1_219460;S334	NaN	NaN	0.506297	0.589461	0.834633	0.0226638	0.643464
putative eukaryotic translation initiation factor	GSHsRDLDWDSLGGK	TGGT1_257350;S30	NaN	NaN	0.633147	0.700637	0.600348	0.00209034	0.644711
tetratricopeptide repeat-containing protein	AATEEsVHAVGSVVEVEDDQVKQER	TGGT1_247000;S468	NaN	NaN	0.651987	0.577847	0.709188	0.00344231	0.646341
hypothetical protein	LGRPGDsPGYYVEAK	TGGT1_200360;S72	NaN	0.244263	0.407072	0.906337	1.03083	0.0424165	0.647126
hypothetical protein	SRtPPDAR	TGGT1_299100T1938	NaN	NaN	0.666053	0.68272	0.59446	0.00174234	0.647744
domain K- type RNA binding proteins family protein	GGYRDsRDAR	TGGT1_235930;S561	NaN	NaN	0.539823	0.649084	0.755292	0.00908714	0.648066
cyclic nucleotide-binding domain-containing protein	AGsLDFSILSR	TGGT1_295850;S2683	NaN	NaN	0.748364	0.691664	0.506442	0.0124395	0.648823
malic enzyme	KHDVDEELItDD	TGGT1_286440T368	0.697755	0.602121	NaN	NaN	NaN	0.046753	0.649938
hypothetical protein	DTGHHsGDDTNETAK	TGGT1_221870;S206	NaN	NaN	0.59534	0.714608	0.640235	0.00285005	0.650061
HECT-domain (ubiquitin-transferase) domain-containing protein	EsSVFAATSAARSR	TGGT1_280660;S6751	NaN	NaN	0.413826	0.620553	0.91862	0.0471024	0.651
transcription elongation factor SPT6	RPPsFGLDAHADKPR	TGGT1_308890;S1254	NaN	NaN	0.732029	0.663075	0.558276	0.00596446	0.651127
putative cell-cycle-associated protein kinase CDK	KLsGSHELPDAGTVGK	TGGT1_304970;S37	NaN	NaN	0.572074	0.660537	0.721107	0.00438611	0.651239
hypothetical protein	DAsWFLPNAR	TGGT1_225160;S199	NaN	0.301368	0.735964	0.741107	0.836675	0.0120696	0.653779
centrin 2	ADsNGDGEISFEDFYAIMTK	TGGT1_250340;S149	NaN	NaN	0.534247	0.551741	0.881467	0.0283985	0.655818
dense granule protein GRA5	RAIQEEsKESATAEEEEVAEEE	TGGT1_286450;S105	0.963209	0.418031	0.647469	0.485764	0.766474	0.00259266	0.656189
Pumilio-family RNA binding repeat-containing protein	KGsTPATTK	TGGT1_260600;S1562	NaN	NaN	0.745345	0.769837	0.455779	0.0227629	0.656987
vacuolar transporter chaperone VTC2	ELGAEGDDFSsAGGK	TGGT1_298630;S190	NaN	NaN	0.680254	0.643134	0.651741	0.000290169	0.658376
hypothetical protein	DRDLPSLsMLYEQLK	TGGT1_226380;S304	NaN	NaN	0.550636	0.746284	0.678481	0.00750269	0.658467
nuclear factor NF4	TAGADAAGAsAK	TGGT1_205580;S475	NaN	NaN	0.667961	0.607291	0.700784	0.0017241	0.658679
regulator of chromosome condensation RCC1	KSAsAGVTVK	TGGT1_213900;S1117	NaN	NaN	0.588618	0.607423	0.783487	0.00873026	0.659843
DEAD/DEAH box helicase domain-containing protein	SRAsPPRK	TGGT1_203220;S958	NaN	NaN	0.679654	0.601837	0.700196	0.00205016	0.660562
rhoptry protein ROP14	QANDRPEAEASLLDKDAGRDETLPFSAATDDSLDsPR	TGGT1_315220;S448	NaN	0.410836	0.613157	0.681135	0.940821	0.00906928	0.661487
hypothetical protein	RsPSPyRGGER	TGGT1_247450;S132; Y136	NaN	NaN	0.61548	0.735826	0.634497	0.00316896	0.661934
hypothetical protein	RPAsGGGSYPSSLGAGK	TGGT1_239410;S2296	NaN	NaN	0.638058	0.693798	0.6546	0.000622462	0.662152
hypothetical protein	ASsMTTVSR	TGGT1_270220;S1200	NaN	0.0444565	0.80119	0.932973	0.87214	0.0497636	0.66269
RNA recognition motif-containing protein	ALEEQVQKLDsDWDELQK	TGGT1_211020;S79	NaN	NaN	0.650192	0.619351	0.723765	0.00216576	0.664436
hypothetical protein	GQAGSLCPGGIGSSGsGVR	TGGT1_283550;S3912	NaN	NaN	0.582991	0.571746	0.840115	0.016932	0.664951
GYF domain-containing protein	GGTGGAsPsPTGSRPSLGSSSSR	TGGT1_298610;S238;;S240	0.748799	NaN	0.665122	0.660902	0.586852	0.000268983	0.665419
hypothetical protein	EAAEPHKEAsEAGARH	TGGT1_239400;S1259	NaN	NaN	0.581222	0.63844	0.782664	0.00796668	0.667442
fumarate hydratase	LPFSSLsPR	TGGT1_267330;S173	NaN	NaN	0.552978	0.639324	0.813661	0.0128934	0.668654
hypothetical protein	EQSDARPPsPR	TGGT1_270060;S269	0.6979	0.491025	0.76814	0.682156	0.709136	0.000140546	0.669671
hypothetical protein	RSSsATAGSAGR	TGGT1_253570;S294	NaN	NaN	0.697965	0.773624	0.538998	0.0104756	0.670196
hypothetical protein	sGGLASVVEAAK	TGGT1_247450;S2234	NaN	NaN	0.683591	0.731001	0.596509	0.0034337	0.670367
hypothetical protein	ETPKEtPKER	TGGT1_229640T895	NaN	NaN	0.75543	0.79059	0.46732	0.022499	0.671113
hypothetical protein	GGSsRDYMDGR	TGGT1_247450;S936	NaN	NaN	0.609288	0.803378	0.601643	0.00952663	0.671436
RNA recognition motif-containing protein	GGFDGFYHGGFNsGPMR	TGGT1_236540;S270	NaN	0.664002	0.610814	0.682568	0.732256	0.000113894	0.67241
hypothetical protein	GAGQQSGAATADHsRsQSVR	TGGT1_313270;S1055; ;S1057	NaN	NaN	0.737392	0.707471	0.577972	0.0052229	0.674278
adaptin c-terminal domain-containing protein	ASSLFsPR	TGGT1_272600;S855	NaN	NaN	0.54382	0.632653	0.846524	0.0172884	0.674332
hypothetical protein	KPSGDEDAsDLESTLDETEAR	TGGT1_205500;S635	NaN	0.058767	0.880978	0.765957	0.993164	0.0491263	0.674717
hypothetical protein	GPVAsPTGGLR	TGGT1_220240;S431	NaN	0.411512	0.738145	0.673784	0.875932	0.00616033	0.674843
rhoptry neck protein RON5	GGVDPTEIHEIVQsR	TGGT1_311470;S172	NaN	0.403988	0.817399	0.794017	0.687638	0.00569827	0.675761
hypothetical protein	HEEEEAAsR	TGGT1_219170;S130	NaN	NaN	0.579595	0.588519	0.860266	0.0180563	0.676127
hypothetical protein	DTSTKNsPREEDDGR	TGGT1_273320;S174	NaN	NaN	0.613909	0.462621	0.959016	0.0438115	0.678515
hypothetical protein	EsLELPGFRDIDVSRTENLSGGR	TGGT1_309720;S883	NaN	NaN	0.760229	0.597904	0.681377	0.00471862	0.679837
hypothetical protein	LRsDDPFAGPASAASEEGASFFPLLSDR	TGGT1_275490;S1721	NaN	NaN	0.790296	0.623656	0.625744	0.00652758	0.679899
hypothetical protein	LLVTSREEEtQRGPPTWAVVPTPTHR	TGGT1_225690T1768	NaN	NaN	0.675551	0.66274	0.704766	0.000333298	0.681019
hypothetical protein	GLMEsERK	TGGT1_279100;S425	NaN	0.221087	0.723677	0.644313	1.14092	0.0362102	0.682499
kelch repeat-containing protein	LVVAPSGLLGVRtPDGELQETAAGASK	TGGT1_272030AT69	NaN	NaN	0.571357	0.748894	0.72737	0.00664975	0.68254
hypothetical protein	GRDRsDENVTEETLR	TGGT1_297210;S890	NaN	NaN	0.72286	0.6625	0.662352	0.00086988	0.682571
hypothetical protein	LIDDGPVGWtSSTGGFSESLLGPPASQGR	TGGT1_262980T193	NaN	NaN	0.630393	0.746158	0.681223	0.00237691	0.685925
hypothetical protein	KHELEINTVQsILTTTPPLSVPESVIDSAASSPR	TGGT1_217510;S81	NaN	NaN	0.657843	0.739771	0.661123	0.00151933	0.686246
hypothetical protein	TDPDKAQAsEEGR	TGGT1_226380;S255	NaN	0.27391	0.805089	0.723731	0.944304	0.0178298	0.686758
Amylo-alpha-1,6-glucosidase	RAAHtGSDTERPENR	TGGT1_226910T846	NaN	NaN	0.750627	0.594944	0.717341	0.0047046	0.687637
hypothetical protein	NESPESGHDAtAQRK	TGGT1_232280T209	NaN	NaN	0.529084	0.601796	0.934814	0.0313638	0.688565
hypothetical protein	GLRSsSDEGDHGASPR	TGGT1_265840;S1177	NaN	NaN	0.687117	0.692045	0.691347	4.97609e-06	0.69017
nucleoside transporter protein	HPGVLSVANLDLStPESVSR	TGGT1_233130T31	NaN	NaN	0.818141	0.713638	0.539151	0.0136139	0.69031
DUF298 domain-containing protein	KHsFDLSR	TGGT1_236530;S40	NaN	NaN	0.720312	0.77235	0.579349	0.00689572	0.69067
hypothetical protein	LELAPIPGRADsDGR	TGGT1_229640;S403	NaN	0.533576	0.513692	0.528598	1.18709	0.0250474	0.690739
alveolin domain containing intermediate filament IMC14	THTSVAYVGGTASVPQQVPIYQEAPVILsPR	TGGT1_260540;S642	NaN	NaN	0.555603	0.714097	0.804955	0.0109184	0.691552
putative GTPase activating protein for adp ribosylation factor	LAAFEDQAVVHLDsLK	TGGT1_273070;S471	NaN	NaN	0.79685	0.723514	0.56	0.010038	0.693455
ATG C terminal domain-containing protein	DQGDGSLPAWFADCTSGtPPK	TGGT1_304630T2019	NaN	NaN	0.658279	0.843183	0.580226	0.0123919	0.693896
hypothetical protein	QAQPPTLLPALPHsFR	TGGT1_232260;S123	NaN	NaN	0.731486	0.643052	0.707617	0.00144529	0.694052
putative cell-cycle-associated protein kinase CDK	RPASGsAEAIAK	TGGT1_304970;S578	NaN	NaN	0.643898	0.782306	0.663097	0.00384198	0.696434
hypothetical protein	GAEEGDGsSGEKK	TGGT1_242780;S2286	NaN	NaN	0.836099	0.725359	0.528754	0.0162335	0.696737
hypothetical protein	QGGRsGELVIK	TGGT1_248420;S685	NaN	0.407845	0.875938	0.81033	0.694482	0.00667665	0.697149
cyclic nucleotide-binding domain-containing protein	tPSKEEQSK	TGGT1_295850T1848	NaN	NaN	0.822345	0.62657	0.645047	0.00789959	0.697987
dense granule protein GRA7	ASVEsQLPR	TGGT1_203310;S80	NaN	0.28339	0.90236	1.02714	0.579399	0.0250817	0.698072
rhoptry protein ROP17	GPSPASDTAsESEPVSTEEAALLQKE	TGGT1_258580;S592	NaN	NaN	0.651054	0.847716	0.59596	0.0117644	0.698243
putative transmembrane protein	APSEQQQPSESERPAGVPMKPGSLTLPFtCLGDTK	TGGT1_410370T168	NaN	NaN	0.621349	0.713592	0.760346	0.00340095	0.698429
nucleoside transporter protein	GPSSQMTVVTMLtPEELSK	TGGT1_233130T331	NaN	NaN	0.881904	0.619393	0.595378	0.0168077	0.698892
hypothetical protein	VsMSPAGVSVSPAGVATCPTGSTGR	TGGT1_311230;S2916	NaN	NaN	0.642567	0.808041	0.647135	0.00600088	0.699248
hypothetical protein	KPGtPTPR	TGGT1_263320T152	NaN	NaN	0.639893	0.71691	0.743552	0.0019648	0.700118
phosphatidylinositol 3- and 4-kinase	SEsGEALCAR	TGGT1_276170;S724	0.841008	0.0367674	0.934037	0.814086	0.877463	0.0137964	0.700672
SWI2/SNF2-containing PHD finger protein	GDNIsPK	TGGT1_236970;S657	NaN	NaN	0.803562	0.772704	0.527348	0.0151773	0.701205
hypothetical protein	VSSAPATAGDRGsEHGDRAETETVCGEGR	TGGT1_215950;S1570	NaN	NaN	0.684163	0.468864	0.952274	0.037482	0.701767
signal recognition particle 14kd protein	SSDVIQsPGNKR	TGGT1_256050;S123	NaN	NaN	0.784382	0.748821	0.572263	0.00862082	0.701822
putative ubiquitin specific protease 39 isoform 2	RAsLQEGSSLAEAAGAAK	TGGT1_294360;S35	NaN	NaN	0.676684	0.686691	0.743939	0.000888379	0.702438
hypothetical protein	GLARVtPRPR	TGGT1_226380T98	NaN	NaN	0.643257	0.614044	0.850633	0.011048	0.702645
Sec61beta family protein	sRGVPASSQGILR	TGGT1_211040;S43	NaN	0.659167	0.760381	0.724859	0.667092	8.87372e-05	0.702875
slc30a2 protein	VVAsPDLAEEEGVSPSR	TGGT1_251630;S277	NaN	NaN	0.737464	0.636945	0.735751	0.00222371	0.703387
dense granule protein GRA5	GREQQQVQQHEQNEDRsLFER	TGGT1_286450;S59	NaN	0.698199	0.739529	0.663934	0.713613	2.48773e-05	0.703819
hypothetical protein	VDDAKSsAR	TGGT1_229640;S818	NaN	NaN	0.810198	0.743542	0.558824	0.0112085	0.704188
hypothetical protein	AAVVsGLANENGLWR	TGGT1_201390;S51	NaN	0.695591	0.344583	0.841446	0.935157	0.0122377	0.704194
adaptin n terminal region domain-containing protein	sLSSLGSGSFASLLSGR	TGGT1_313670;S615	NaN	NaN	0.735762	0.709719	0.66915	0.000755153	0.704877
tetratricopeptide repeat-containing protein	GVAATPVVQPNTGsPR	TGGT1_260150;S2801	NaN	NaN	0.719404	0.715909	0.680306	0.000313585	0.705206
root hair defective 3 gtp-binding protein (rhd3) protein	QVLVAALSAVDGASAsPPR	TGGT1_314970;S836	NaN	NaN	0.582785	0.710241	0.824518	0.00964232	0.705848
hypothetical protein	GFsPPVKR	TGGT1_278030;S2181	NaN	NaN	0.625847	0.585232	0.907829	0.0200111	0.706303
hypothetical protein	ATDKEQPRsPTSGR	TGGT1_226900;S200	NaN	NaN	0.709549	0.817368	0.595638	0.00808738	0.707518
eukaryotic translation initiation factor 3 subunit 6 interacting protein	EEGAQVGHEEDDSLsPDSRFPVSPSNQASQNVEGEGLDDAALDR	TGGT1_273460;S33	NaN	NaN	0.510119	0.941583	0.673425	0.0301079	0.708376
putative histone lysine methyltransferase, SET	SsPSSSDLLLVTQQLER	TGGT1_201250;S592	NaN	NaN	0.81415	0.671655	0.639946	0.00566726	0.708584
hypothetical protein	VPPTRSSAtR	TGGT1_200360T93	0.887537	NaN	0.371714	0.569431	1.00583	0.016467	0.708628
PEP-carboxykinase I	TQsSGSLKDSISFLEMLK	TGGT1_289650;S101	NaN	0.813662	0.57721	0.822511	0.621242	0.00156647	0.708656
WD domain, G-beta repeat-containing protein	SDsGVSAGLR	TGGT1_263360;S1293	NaN	NaN	0.689818	0.827232	0.611885	0.00777733	0.709645
RNA polymerase-associated protein RTF1	KQDsGAGSFLMTTGTLLK	TGGT1_244210;S475	NaN	NaN	0.701444	0.601727	0.826046	0.0082552	0.709739
cyclic nucleotide-binding domain-containing protein	AtSSPLPTGPGSQAGNEGEK	TGGT1_295850T1341	NaN	NaN	0.787116	0.538257	0.805864	0.0144211	0.710412
hypothetical protein	ASVsLPYNLEK	TGGT1_228150;S1753	NaN	0.787398	0.720448	0.72392	0.610599	0.000301194	0.710591
hypothetical protein	GHTsPAGVSPEDTVVEILDFVSR	TGGT1_301410;S53	NaN	NaN	0.794355	0.907262	0.430211	0.0386649	0.710609
putative cyclin 4	GAEHREDDsSSR	TGGT1_264690;S458	1.05146	NaN	0.410853	0.665487	0.717051	0.0124442	0.711212
GYF domain-containing protein	RDsGEGLLPDGEREQVAAQPQGAWQSQLNLAADSK	TGGT1_298610;S1734	0.829692	0.877837	0.585043	0.589253	0.67985	0.000300653	0.712335
hypothetical protein	TQGSAsPGSAPK	TGGT1_253570;S271	NaN	NaN	0.750231	0.805815	0.582923	0.00871097	0.71299
hypothetical protein	GAEAEGALsEK	TGGT1_271990;S421	NaN	NaN	0.739846	0.751152	0.648741	0.00205937	0.713246
hypothetical protein	EGEETAHAGEGGsRVR	TGGT1_313270;S1729	NaN	NaN	0.727552	0.867816	0.544519	0.0167867	0.713296
hypothetical protein	APtRDEGGANEHFKR	TGGT1_221470T363	NaN	NaN	0.625282	0.69206	0.82337	0.00658346	0.713571
alveolin domain containing intermediate filament IMC12	HAEKEAAVGsLAssPR	TGGT1_248700;S246;;S249;;S250	0.888776	NaN	0.610665	0.5647	0.790707	0.00256264	0.713712
hypothetical protein	GDSEQPRGsGDR	TGGT1_249580;S658	NaN	NaN	0.659826	0.722549	0.759455	0.001655	0.713943
hypothetical protein	GVsPLSTVAEER	TGGT1_309720;S115	NaN	NaN	0.687572	0.855346	0.599799	0.0108375	0.714239
HCNGP family protein	RVDsLTGR	TGGT1_217440;S270	NaN	NaN	0.637534	0.795295	0.712329	0.00403548	0.715053
AP2 domain transcription factor AP2XII-5	HLVGGDGsPSLDR	TGGT1_247730;S390	NaN	NaN	0.707592	0.629032	0.808935	0.00525939	0.715186
TAF7-like RNA polymerase II TAF7L	GAPLEDEDGAGsAVGIGGDLGISGAPLASGSGPGR	TGGT1_309170;S564	NaN	NaN	0.60549	0.548465	0.993805	0.0361364	0.71592
dense granule protein GRA5	DVGSGGDDsEGAR	TGGT1_286450;S38	0.912962	0.488073	0.702443	0.703624	0.775887	0.000479904	0.716598
hypothetical protein	KLEsPTLK	TGGT1_240220;S1374	NaN	NaN	0.774096	0.725817	0.6503	0.00251664	0.716738
zinc finger (CCCH type) motif-containing protein	ICSAGGLEsPLASR	TGGT1_202900;S1134	NaN	NaN	0.604027	0.683981	0.862595	0.0111774	0.716868
putative eukaryotic translation initiation factor	AASAAsLPALEPSLSQPFGK	TGGT1_257350;S389	NaN	NaN	0.611732	0.692448	0.847958	0.00920916	0.717379
hypothetical protein	QAVTSGVRtPEGGAGAR	TGGT1_297210T3376	NaN	NaN	0.762577	0.869643	0.520766	0.020053	0.717662
hypothetical protein	AGEAGsQQTATREEEGSGEAERPLTSAATVR	TGGT1_242700;S707	NaN	NaN	0.65847	0.740278	0.755461	0.00175487	0.71807
hypothetical protein	AREsPNKR	TGGT1_309720;S822	NaN	NaN	0.721988	0.667505	0.767636	0.00161628	0.719043
adaptin c-terminal domain-containing protein	SSYAGSECsDDKR	TGGT1_272600;S51	NaN	NaN	0.659775	0.635315	0.862265	0.00985487	0.719118
hypothetical protein	ETGGETAtVAsEGMGSR	TGGT1_311230T3298; ;S3301	NaN	NaN	0.75792	0.657469	0.742783	0.00188379	0.719391
cyclic nucleotide-binding domain-containing protein	SAHAPDsPAESPTGAVASSTASSLHVGR	TGGT1_295850;S873	NaN	NaN	0.929039	0.648649	0.581075	0.0212204	0.719588
CBS domain-containing protein	KAAsPPR	TGGT1_211350;S943	NaN	NaN	0.908127	0.689394	0.562718	0.0190689	0.72008
hypothetical protein	GAVKPFGLLSPGsGPDEK	TGGT1_239410;S657	NaN	NaN	0.818048	0.677326	0.665247	0.00460532	0.720207
hypothetical protein	DVPDSLRQsPALGTK	TGGT1_217530;S218	NaN	0.493026	0.820397	0.734721	0.836329	0.00280327	0.721118
zinc finger (CCCH type) motif-containing protein	SLQsDPEGERDTSR	TGGT1_202900;S896	0.769115	NaN	0.675089	0.740288	0.700109	5.33601e-05	0.72115
FAD binding domain-containing protein	GHsRDADRADANAADSDR	TGGT1_220360;S734	NaN	NaN	0.59508	0.77554	0.793922	0.00764234	0.721514
putative vacuolar proton translocating ATPase subunit	SDLRPSsPLFESTASLSLLEAGTAGLSAR	TGGT1_290720;S252	NaN	NaN	0.733154	0.936652	0.49543	0.0298171	0.721745
putative cell-cycle-associated protein kinase CDK	SLDsEERESHPASR	TGGT1_249260;S1153	NaN	NaN	0.709965	0.7	0.755973	0.000569614	0.721979
hypothetical protein	VTHsQSEPHFGGPHAIEATLQAAR	TGGT1_225160;S69	NaN	0.205357	0.902883	0.909585	0.873016	0.0248449	0.72271
hypothetical protein	ESPHtDDEEPDPR	TGGT1_208010T267	NaN	NaN	0.775946	0.591904	0.800946	0.0082099	0.722932
hypothetical protein	LVIQNKPsTNVSVDR	TGGT1_289970;S68	NaN	NaN	0.581699	0.675923	0.912155	0.0179709	0.723259
SAG-related sequence SRS34A	LTtVLPGAVLTAK	TGGT1_271050T85	NaN	NaN	0.74489	0.700344	0.727862	0.000320823	0.724365
RNA recognition motif-containing protein	GFSSWTsQDHWEGR	TGGT1_291330;S67	NaN	NaN	0.643228	0.762842	0.767151	0.00312773	0.724407
surface antigen repeat-containing protein	RAGsPEAAGILQTPAYAAALK	TGGT1_213392;S493	NaN	NaN	0.815147	0.824711	0.534662	0.0167917	0.72484
hypothetical protein	LPPASVIAHQLGAsAAVSAPGVSPSVGSAPSASPPVR	TGGT1_240060;S803	NaN	NaN	0.826905	0.717204	0.630551	0.00608652	0.724887
SAG-related sequence SRS34A	KLtTVLPGAVLTAK	TGGT1_271050T84	NaN	NaN	0.771764	0.58209	0.821274	0.00995634	0.725043
hypothetical protein	AsQSLSRDPSLEPK	TGGT1_306400;S817	NaN	NaN	0.700155	0.597481	0.878182	0.0125424	0.725273
hypothetical protein	GDKESGDsDAGER	TGGT1_299100;S556	NaN	NaN	0.772769	0.87441	0.529119	0.0193667	0.725433
microneme protein MIC6	GIEAAEASEVEVLVDLDsKTWD	TGGT1_218520;S345	NaN	NaN	0.618568	0.853191	0.704545	0.00880652	0.725435
hypothetical protein	SFDHEPALLGsAR	TGGT1_229640;S420	0.805237	0.58523	0.697828	0.881458	0.659722	0.00016043	0.725895
SAC3/GANP family protein	RESsKDLHAEK	TGGT1_250830;S272	1.05122	0.932658	0.633469	0.492537	0.520866	0.00297684	0.72615
hypothetical protein	GREEEsSLSRR	TGGT1_232080;S1030	NaN	NaN	0.677606	0.667976	0.834171	0.00545106	0.726584
hypothetical protein	EVsPSRDNAEGR	TGGT1_219460;S558	NaN	NaN	0.641688	0.597426	0.942278	0.0214832	0.727131
protein disulfide-isomerase domain-containing protein	RHsGVLGYFSR	TGGT1_238040A;S24	NaN	NaN	0.735788	0.719826	0.728701	4.02154e-05	0.728105
hypothetical protein	QADGGEtPR	TGGT1_269260T148	NaN	NaN	0.822698	0.793498	0.569082	0.0118818	0.728426
TBC domain-containing protein	TTsPDDTLR	TGGT1_203910;S319	NaN	NaN	0.794989	0.86319	0.527302	0.0192293	0.728494
putative membrane protein C17G8.08c	VLHRDGsQESGSTLWGR	TGGT1_319550;S233	NaN	0.664955	0.586796	0.74	0.923623	0.00205915	0.728844
hypothetical protein	GGsDGGGTSGKK	TGGT1_264130;S34	0.852299	0.795596	0.646531	0.624133	0.727569	7.26337e-05	0.729226
tetratricopeptide repeat-containing protein	ADGDDEsGDDFVWLVTK	TGGT1_260150;S386	NaN	NaN	0.807568	0.739042	0.645124	0.00412781	0.730578
hypothetical protein	RHsDGQDSETR	TGGT1_257580;S568	NaN	NaN	0.599383	0.645631	0.947092	0.0215419	0.730702
zinc finger (CCCH type) motif-containing protein	LGVAGERGsR	TGGT1_218300;S361	NaN	NaN	0.686522	0.781183	0.726542	0.00140397	0.731416
hypothetical protein	AWsPAGSVPGFSATEPDSGVSFDAPGR	TGGT1_232080;S3387	NaN	NaN	0.515927	0.983301	0.696208	0.0328852	0.731812
cwf21 protein	MDPEDtRSADRER	TGGT1_282140T354	NaN	NaN	0.930014	0.700233	0.565217	0.020523	0.731821
DEAD/DEAH box helicase domain-containing protein	SCsAEETK	TGGT1_284050;S659	NaN	NaN	0.72776	0.662318	0.805905	0.00319946	0.731994
hypothetical protein	TSGCGsDKGASR	TGGT1_220090;S161	NaN	NaN	1	0.737003	0.459747	0.0425011	0.73225
hypothetical protein	AASASSSRPSANsPTSTSK	TGGT1_289970;S197	NaN	NaN	0.638459	0.675192	0.883555	0.0106841	0.732402
putative cell-cycle-associated protein kinase CDK	RDDsERHEDGAR	TGGT1_304970;S652	NaN	NaN	0.656956	0.767396	0.773762	0.00266755	0.732705
UDP-galactose transporter family protein	GVsPVAR	TGGT1_254580;S13	NaN	NaN	0.717326	0.737136	0.74498	0.00012594	0.733147
rhoptry protein ROP6	VLEPETLEGSPALVPPAEtEEGTAAQIAEEMSK	TGGT1_258660T397	NaN	NaN	0.768944	0.73159	0.699588	0.000745952	0.733374
hypothetical protein	GGKDtPESEKVQNEQQQSAEER	TGGT1_246090T914	NaN	NaN	0.774775	0.783816	0.643069	0.0038191	0.733887
putative integral membrane protein	ELtGDHKENHTNTSSDYVK	TGGT1_266800T54	NaN	NaN	0.710451	0.702562	0.789906	0.00143978	0.734306
hypothetical protein	EREsEGGDTAEGKK	TGGT1_239410;S2442	NaN	NaN	0.856302	0.704457	0.646082	0.0071761	0.735614
ankyrin repeat-containing protein	DAAEAAEANAsEKAEAK	TGGT1_255510;S482	NaN	NaN	0.699942	0.667033	0.840084	0.00516079	0.735686
hypothetical protein	GSVSGDsPK	TGGT1_312190;S112	NaN	NaN	0.687402	0.63152	0.88916	0.0111138	0.736027
hypothetical protein	ELsPTKDQHASPGR	TGGT1_279320;S262	NaN	NaN	0.664699	0.879121	0.664698	0.00929503	0.736173
putative cell-cycle-associated protein kinase CDK	SERAsLGREDR	TGGT1_249260;S1821	NaN	NaN	0.764006	0.714815	0.732935	0.000379342	0.737252
dense granule protein GRA6	IEEQGtRR	TGGT1_275440T128	0.733506	0.667971	0.888889	0.855646	0.543219	0.000304658	0.737846
type I inorganic pyrophosphatase PPase	LVsGTEGEKDFR	TGGT1_283830;S197	NaN	NaN	0.702285	0.65378	0.857865	0.00688616	0.737977
hypothetical protein	GQsREDERGEAEER	TGGT1_297210;S3387	NaN	NaN	0.774934	0.96875	0.470874	0.0364348	0.738186
zinc finger (CCCH type) motif-containing protein	AGGNVPTSPVYEQLAACGAGVTtPVVNAADR	TGGT1_218300T52	NaN	NaN	0.74087	0.807152	0.66756	0.00296645	0.738527
WD domain, G-beta repeat-containing protein	EKIDESIGsAAEESSR	TGGT1_263360;S439	NaN	NaN	0.433307	0.85625	0.926648	0.0408453	0.738735
putative transmembrane protein	APsEQQQPSESERPAGVPMKPGSLTLPFTCLGDTK	TGGT1_410370;S142	NaN	0.126258	0.90069	0.820928	1.10924	0.0404124	0.739279
hypothetical protein	GIESFLTQEDtDEDNSVLSSFSR	TGGT1_221390T757	NaN	NaN	0.635501	0.77043	0.812726	0.0051808	0.739552
hypothetical protein	LTFESLTsPARDR	TGGT1_306220;S510	NaN	0.696363	0.722624	0.801282	0.738983	6.0125e-05	0.739813
hypothetical protein	APEtPEAILPEER	TGGT1_217680T1871	NaN	NaN	0.862034	0.63745	0.720804	0.0077524	0.740096
hypothetical protein	HSSADGEsGRR	TGGT1_246950;S273	NaN	NaN	0.608833	0.795569	0.816071	0.00784091	0.740158
CCR4-Not complex component, Not1 protein	AAEEsETMSR	TGGT1_291140;S1985	NaN	NaN	0.664238	0.668693	0.888317	0.00983151	0.740416
hypothetical protein	AKsPGNLSPAAVAAGK	TGGT1_308860;S635	NaN	0.656401	0.763158	0.809357	0.732902	0.000178902	0.740454
hypothetical protein	SVSVsPGPVR	TGGT1_306400;S957	0.90412	NaN	0.651476	0.632242	0.775	0.0013215	0.74071
Sin3-associated polypeptide SAP18	SGPGAFWGsGDR	TGGT1_201400;S389	NaN	NaN	0.764986	0.889309	0.570332	0.0153103	0.741542
kinase, pfkB family protein	TQDTAGNVFEEREGsDDDWPSLSK	TGGT1_305030;S277	1.16441	NaN	0.684299	0.604632	0.513177	0.0145173	0.741629
UDP-galactose transporter family protein	EPAsPTAHGGENALK	TGGT1_254580;S399	NaN	0.532669	0.817774	0.828113	0.788353	0.00181048	0.741727
hypothetical protein	SPGSRLsLLK	TGGT1_220240;S420	NaN	NaN	0.636986	0.599801	0.989399	0.0268609	0.742062
hypothetical protein	TPIEAEIIItPPRK	TGGT1_320030T600	NaN	NaN	0.729323	0.810138	0.687407	0.00234614	0.742289
hypothetical protein	CDWDKWIDsDDEDAK	TGGT1_321520;S109	NaN	1.02763	0.753475	0.666041	0.523632	0.0059916	0.742695
eIF2 kinase IF2K-A (incomplete catalytic triad)	GVGSSAVRDsGPR	TGGT1_229630;S3676	NaN	NaN	0.726701	0.672843	0.829585	0.00380726	0.743043
hypothetical protein	LETSGFNsDNEETLASSR	TGGT1_217680;S1310	NaN	0.537582	0.91994	0.89492	0.619876	0.00455166	0.743079
putative U2 snRNP auxiliary factor	RRsPsIQRPER	TGGT1_236910;S224;;S226	1.00171	NaN	0.626781	0.743682	0.600733	0.0039129	0.743228
hypothetical protein	ALSATHsAEEEKEK	TGGT1_239410;S2391	NaN	NaN	0.652281	0.765504	0.816014	0.00419989	0.7446
hypothetical protein	KDsGAKLPDHAK	TGGT1_264430;S638	NaN	NaN	0.784974	0.667827	0.783842	0.002706	0.745548
zinc finger (CCCH type) motif-containing protein	SVsPSDSGGHR	TGGT1_202900;S31	0.86978	NaN	0.53336	0.568311	1.012	0.0077194	0.745863
hypothetical protein	SFYVVPGsEKR	TGGT1_229640;S1059	NaN	NaN	0.831917	0.703875	0.701797	0.00331197	0.745863
hypothetical protein	VAARHsEEVK	TGGT1_244470;S370	NaN	NaN	0.963788	0.802882	0.471284	0.0357628	0.745985
splicing factor, CC1 family protein	EWPsGSGYGR	TGGT1_312530;S116	NaN	NaN	0.700422	0.820486	0.717052	0.00252516	0.745987
ubiquitin carboxyl-terminal hydrolase	sKEFIAENK	TGGT1_221610;S5	NaN	NaN	0.849384	0.664067	0.72618	0.0052789	0.746544
hypothetical protein	IGTTETALSLLLAHADsSENPK	TGGT1_229640;S715	NaN	NaN	0.747875	0.808579	0.684232	0.00230223	0.746895
hypothetical protein	GMEIsQTSK	TGGT1_217680;S170	NaN	NaN	0.690332	0.677291	0.87471	0.00719475	0.747444
dual specificity phosphatase, catalytic domain-containing protein	AWsPLSHSR	TGGT1_268770;S879	NaN	NaN	0.737143	0.737395	0.768381	0.000192365	0.74764
DnaJ domain-containing protein	QsSWTPDELSLLAK	TGGT1_203380;S545	NaN	NaN	0.806429	0.858198	0.579511	0.0128377	0.748046
hypothetical protein	AFKsDEEWQTFVAATAEEVGSK	TGGT1_266400;S132	NaN	NaN	0.721748	0.711066	0.812134	0.00183021	0.748316
hypothetical protein	RRsIESDR	TGGT1_240220;S1512	NaN	NaN	0.888554	0.675208	0.681942	0.00863629	0.748568
hypothetical protein	RQsAEASGLR	TGGT1_226620;S1238	NaN	NaN	0.8	0.771938	0.675039	0.00254449	0.748992
hypothetical protein	LRsSPPQHQGVR	TGGT1_272520;S55	NaN	NaN	0.753257	0.745446	0.749409	9.05438e-06	0.749371
hypothetical protein	GRsADGEGTAAGETEMHK	TGGT1_297210;S2032	NaN	NaN	0.813769	0.934821	0.501618	0.0283475	0.750069
MIF4G domain-containing protein	EVAsAGEAASVVELSQEVAEAAASTAAPSGPMTWAER	TGGT1_269180;S1127	NaN	NaN	0.582471	0.939031	0.728758	0.0185059	0.750087
RNA recognition motif-containing protein	FSRsPDRR	TGGT1_208970;S277	NaN	NaN	0.742035	0.586429	0.923227	0.0163995	0.750564
hypothetical protein	SVsGLEADGFATAGCR	TGGT1_230000;S4666	NaN	NaN	0.724986	0.705944	0.820764	0.00223304	0.750565
hypothetical protein	GLsREEERR	TGGT1_209210;S1016	NaN	1.02435	0.616183	0.681841	0.681429	0.00389832	0.750951
UDP-galactose transporter family protein	HVTGAGPSSPFSNLSTTsGQDEAQSK	TGGT1_254580;S39	NaN	NaN	0.818148	0.772185	0.663454	0.00370651	0.751262
hypothetical protein	SDGKPsPGR	TGGT1_220240;S392	NaN	0.335901	0.888303	0.772592	1.00982	0.0144204	0.751654
transporter, major facilitator family protein	KPAsPVTPSVETSIHSCVADSSDVK	TGGT1_253130;S338	NaN	NaN	0.697115	1.06458	0.494191	0.0459109	0.751962
Ras-related protein Rab11	IHLDEERTDsQIR	TGGT1_289680;S207	NaN	0.671325	0.706935	0.587227	1.04543	0.00496446	0.752729
hypothetical protein	SHAERsFER	TGGT1_297180;S771	NaN	NaN	0.750259	0.676866	0.831383	0.00349503	0.752836
TBC domain-containing protein	GSVLLPSYVSVGsGNAK	TGGT1_274130;S1895	NaN	NaN	0.797533	0.610925	0.85022	0.00916941	0.752893
hypothetical protein	VSIQItPER	TGGT1_295360T105	NaN	NaN	0.696931	0.773303	0.788685	0.00141663	0.752973
WD domain, G-beta repeat-containing protein	sLDKVDFLGK	TGGT1_263360;S1425	NaN	NaN	0.746646	0.841518	0.672238	0.00420019	0.753467
hypothetical protein	RVDsTGGEESGVGETVSLLR	TGGT1_229790;S611	NaN	NaN	0.775714	0.605706	0.879458	0.0110254	0.753626
alveolin domain containing intermediate filament IMC6	GGSFVSQVGTESQVPRPAATDEQAEGSADAGDKQGsR	TGGT1_220270;S432	NaN	NaN	0.628482	0.598272	1.03421	0.0330631	0.753655
putative eukaryotic translation initiation factor	SLPsGELDPEAIEEMQQLK	TGGT1_257350;S614	NaN	0.773093	0.759777	0.684258	0.798436	7.59275e-05	0.753891
serine/threonine specific protein phosphatase	SNVYPVELVCQtR	TGGT1_304955T2667	NaN	0.356389	0.957841	0.859226	0.843073	0.0113248	0.754132
hypothetical protein	FGLGsVSR	TGGT1_247450;S980	NaN	NaN	0.789474	0.752111	0.721253	0.000683062	0.754279
hypothetical protein	LKSEAPLEETGKPKPEVDtLETSATR	TGGT1_230160T112	NaN	0.659546	0.889316	0.714078	0.75431	0.000595866	0.754312
hypothetical protein	GSCLFPLSSSPVIPsPR	TGGT1_240510;S837	NaN	NaN	0.806058	0.682688	0.776364	0.00241554	0.755037
glycerol-3-phosphate-acyltransferase	SAsAPLGMQNPPVLSILGNSTR	TGGT1_256980;S278	NaN	0.877719	0.622272	0.774814	0.746062	0.000730581	0.755217
peptidyl-prolyl cis-trans isomerase, cyclophilin-type domain-containing protein	MQAPtPPK	TGGT1_305940T564	NaN	NaN	0.873782	0.733856	0.658025	0.00692882	0.755221
hypothetical protein	SRLEsEERQEGR	TGGT1_290620;S2136	NaN	NaN	0.798077	0.871745	0.59614	0.011688	0.755321
hypothetical protein	QtSMPTTHIGGLAGR	TGGT1_236890T90	NaN	0.107505	0.907915	1	1.00601	0.040082	0.755358
RNA recognition motif-containing protein	ERDsLPSSR	TGGT1_304760;S611	0.963974	NaN	0.66112	0.652896	0.744284	0.0018833	0.755568
HECT-domain (ubiquitin-transferase) domain-containing protein	GARDEEsPARR	TGGT1_291980;S1886	NaN	NaN	0.59853	0.763863	0.904343	0.0134068	0.755579
alveolin domain containing intermediate filament IMC1	ALQQLHGtQEsVR	TGGT1_231640T62;;S65	NaN	NaN	0.706092	0.740756	0.820283	0.00199462	0.75571
RNA pseudouridine synthase superfamily protein	IAAAADPGVFLLCPAALSSSLSSFAPsPR	TGGT1_306660;S3121	NaN	NaN	0.825926	0.794264	0.647232	0.00526357	0.755807
hypothetical protein	TQAANsEEERTEK	TGGT1_242700;S1153	NaN	NaN	0.778142	0.789815	0.700855	0.00135938	0.756271
PLU-1 family protein	LIVHQEADsADDRDEEEREER	TGGT1_253750;S6560	0.822912	1.11601	0.653926	0.626719	0.562245	0.00161855	0.756363
hypothetical protein	AGTDGsAGSVYPTGFIFYYDR	TGGT1_254470;S709	NaN	NaN	0.6693	0.972381	0.627926	0.0199839	0.756536
PHD-finger domain-containing protein	VPGGFVFPLALQLAGGsPAGGQK	TGGT1_224260;S4345	NaN	NaN	0.879293	0.825229	0.565953	0.0159373	0.756825
putative cell-cycle-associated protein kinase CDK	REPsREEETR	TGGT1_304970;S588	NaN	NaN	0.731793	0.822565	0.716644	0.00190328	0.757001
hypothetical protein	ETGGETATVAsEGMGSR	TGGT1_311230;S3301	0.850213	NaN	0.692526	0.70674	0.778544	0.000241695	0.757006
hypothetical protein	RLEsGEAPK	TGGT1_257430;S1057	NaN	NaN	0.726834	0.776034	0.771155	0.000426013	0.758008
hypothetical protein	DVSHMHsGDAGPHR	TGGT1_283550;S3601	NaN	NaN	0.702639	0.6396	0.931805	0.0134416	0.758015
putative E3 ubiquitin-protein ligase	REsREEDSAPGK	TGGT1_294280;S419	NaN	NaN	0.872523	0.875	0.526776	0.0224954	0.7581
rhoptry neck protein RON6	DQDHVDNAsADRQNAEAEGNEAK	TGGT1_297960A;S814	NaN	NaN	0.742795	0.815463	0.717352	0.00149842	0.758537
ATG C terminal domain-containing protein	KTLGRFsPPPSR	TGGT1_304630;S3993	NaN	NaN	0.891797	0.762215	0.621856	0.0103926	0.758623
putative DNA replication licensing factor	GGVLDENVDYFQGsRELDLEER	TGGT1_214970;S62	NaN	NaN	0.878691	0.762243	0.635309	0.00847079	0.758748
hypothetical protein	SLtPRPAYERPPAGVPSSSGR	TGGT1_201760T177	NaN	NaN	0.705746	0.759565	0.811356	0.00161019	0.758889
hypothetical protein	RAsPLPSTYR	TGGT1_224210;S1053	NaN	NaN	0.623771	0.707185	0.945974	0.0157999	0.758977
hypothetical protein	HRDsAAGSATGVDEAERR	TGGT1_311230;S4559	0.967909	NaN	0.570268	0.652345	0.846187	0.00355078	0.759177
hypothetical protein	GGAGGEGRGsAKLEPVEAGPEAENPATR	TGGT1_217680;S956	NaN	0.532777	0.751762	0.711155	1.04176	0.0055216	0.759364
bifunctional dihydrofolate reductase-thymidylate synthase	TGDSGLPsPSVGKR	TGGT1_249180;S67	NaN	NaN	0.703936	0.827986	0.746347	0.00228977	0.759423
LNS2 (Lipin/Ned1/Smp2) protein	GSsQGGLADSER	TGGT1_230690;S1019	0.783277	NaN	0.641221	0.763027	0.851043	0.000415743	0.759642
hypothetical protein	SAVEAQTQDACVDsDRER	TGGT1_268780;S5905	NaN	NaN	0.804783	0.741561	0.734558	0.0008617	0.760301
putative DNA mismatch repair protein MSH6-1	GAVGsPEKNKDAVQK	TGGT1_290640;S118	NaN	0.933403	0.794904	0.672533	0.640809	0.00143839	0.760412
DEAD/DEAH box helicase domain-containing protein	AQAGGALDGAAsDVDSASSAK	TGGT1_253090;S120	0.879048	0.45077	0.845567	0.832004	0.79657	0.000638282	0.760792
ubiquitin-activating enzyme E1 family protein	VAIPQFtPK	TGGT1_290290T812	NaN	NaN	0.853061	0.741071	0.689796	0.00398523	0.761309
hypothetical protein	RAsTGTAASVR	TGGT1_239410;S970	NaN	NaN	0.737616	0.83188	0.715503	0.00218753	0.761666
hypothetical protein	LISSAGFDVPLYASLGASTATSGVHtPAFSR	TGGT1_313430T3234	NaN	NaN	0.782803	0.9179	0.584317	0.0157943	0.761673
hypothetical protein	ILVPGVAGEASVEsPSAALR	TGGT1_210700;S1622	NaN	NaN	0.88785	0.947566	0.451941	0.0395044	0.762452
nuclear factor NF4	KPEENANTEEKQEDGtGGATSPAVSNLK	TGGT1_205580T60	NaN	NaN	0.792621	0.677189	0.819272	0.00324965	0.763027
cholinephosphate cytidylyltransferase	SFIGLHHKsPR	TGGT1_216930;S312	NaN	NaN	0.771886	0.8047	0.712701	0.00124209	0.763096
SAG-related sequence SRS29B	ASsVVNNVAR	TGGT1_233460;S182	NaN	NaN	0.683892	0.721707	0.883893	0.00639909	0.763164
hypothetical protein	GEGTVPWSDPGEPVsPR	TGGT1_306020;S2190	NaN	NaN	0.778037	0.734306	0.778297	0.000366452	0.763547
RNA recognition motif-containing protein	RPsDRLEPGEEAMR	TGGT1_294710;S897	NaN	0.73213	0.747737	0.755847	0.818632	3.38829e-05	0.763587
hypothetical protein	TASWsPSLESQVQK	TGGT1_229640;S560	NaN	0.829256	0.80406	0.765683	0.656046	0.000273666	0.763761
hypothetical protein	EIIPEADESVRPQHsEPLTFER	TGGT1_217680;S2000	NaN	NaN	0.964753	0.704183	0.62413	0.0176215	0.764355
hypothetical protein	DRERsGEGSGER	TGGT1_232120;S1245	NaN	NaN	0.821987	0.761817	0.709469	0.0018035	0.764424
hypothetical protein	SDIGTHVPGKRsPPSPSPLQGPR	TGGT1_220240;S275	NaN	0.396434	0.691254	0.665343	1.30506	0.0283854	0.764523
hypothetical protein	ELGsGASATTTANRPTGR	TGGT1_313590A;S916	NaN	NaN	0.60625	0.822109	0.865724	0.0108256	0.764694
NifU family domain-containing protein	AVsSEDVSGAAEGRPEVPEKK	TGGT1_212930;S211	NaN	NaN	0.710938	0.72767	0.856806	0.00360858	0.765138
hypothetical protein	FHGNSGsGR	TGGT1_268980;S123	NaN	NaN	0.827586	0.525269	0.943376	0.0255055	0.76541
hypothetical protein	EEVDEEGFVIEDGHYVsGSEHEGR	TGGT1_311230;S3891	NaN	NaN	0.754671	0.785968	0.755709	0.000179746	0.765449
PLU-1 family protein	KNPsQSSATAGAGVGISSNPGK	TGGT1_253750;S3646	NaN	NaN	0.866736	0.829077	0.602988	0.011356	0.766267
hypothetical protein	RVsDDPQSAGDVGKDTEALPR	TGGT1_214600;S1627	NaN	0.561102	0.837111	0.909047	0.758173	0.00200069	0.766358
UBX domain-containing protein	ELGGISRLPsAVR	TGGT1_288340;S111	NaN	0.6685	0.642752	0.611849	1.14278	0.00891432	0.76647
hypothetical protein	KTEtDREEQER	TGGT1_246190T4646	NaN	NaN	0.957831	0.927139	0.415738	0.0487414	0.766903
hypothetical protein	LSDsSEFFGNLEEFER	TGGT1_232080;S5686	NaN	NaN	0.73166	0.842338	0.726816	0.00241094	0.766938
hypothetical protein	TPTDEAFsGRDEQENK	TGGT1_285950;S271	NaN	0.792747	0.799814	0.845101	0.631912	0.000488151	0.767394
hypothetical protein	RVsVEPPSCADPNRPQEDTIR	TGGT1_270060;S614	NaN	NaN	0.913261	0.7171	0.671846	0.00919292	0.767402
alveolin domain containing intermediate filament IMC7	RLVsKTTHIK	TGGT1_222220;S49	NaN	0.88013	0.722304	0.807577	0.659635	0.00054135	0.767411
rhoptry neck protein RON5	NLVSGVHSTGDsVEVR	TGGT1_311470;S1671	NaN	NaN	0.711456	0.742735	0.848915	0.0029232	0.767702
hypothetical protein	EIPFsVGIPEEQAAQLR	TGGT1_213067;S415	NaN	NaN	0.765933	0.832356	0.704846	0.00229229	0.767712
reticulon protein	VLDLAPSFGEGPVEIVsR	TGGT1_226430;S88	NaN	0.526088	0.808452	0.844216	0.893079	0.00262162	0.767959
helicase associated domain (ha2) protein	GRDsPLLPR	TGGT1_318440;S81	NaN	NaN	0.738149	0.816029	0.750265	0.000990625	0.768148
hypothetical protein	sLEsVGNDNLPSR	TGGT1_289880;S720;;S723	0.635458	NaN	0.796875	0.777122	0.865813	0.000540705	0.768817
DEAD/DEAH box helicase domain-containing protein	AAQAADIMLDsDIsEDEEASAR	TGGT1_270620;S907; ;S910	NaN	NaN	0.808989	0.653271	0.844887	0.00579687	0.769049
carbamoylphosphate synthetase	LRtGEGDAPGK	TGGT1_215260T1118	NaN	NaN	0.819728	0.883205	0.605929	0.0116688	0.769621
hypothetical protein	VCSTSSSVGDFsPSRR	TGGT1_270060;S608	NaN	NaN	0.907423	0.756134	0.645743	0.00956961	0.769767
hypothetical protein	TTAPSASGNsTSSHDQR	TGGT1_206320;S44	NaN	NaN	0.75216	0.813975	0.743498	0.000829717	0.769878
hypothetical protein	SLMQPMLTTGItPR	TGGT1_225690T478	NaN	NaN	0.786765	0.72644	0.797316	0.000820738	0.770174
hypothetical protein	AQsGDIASAAQVEEAAR	TGGT1_299100;S1839	NaN	NaN	0.817847	0.852691	0.640625	0.00718514	0.770388
corepressor complex CRC230	GALFASVSRPAFAsPGFAPSGGLSSSALQQQLTMGR	TGGT1_305340;S1039	NaN	NaN	0.628116	0.734893	0.948587	0.0146227	0.770532
MIF4G domain-containing protein	SGAGGsGSQK	TGGT1_254940;S1031	NaN	NaN	0.850725	0.860574	0.600425	0.0119838	0.770575
DHHC zinc finger domain-containing protein	DLSDVsQCTPVRPADFVPPR	TGGT1_249380;S385	NaN	NaN	0.681544	0.646303	0.984224	0.0188209	0.77069
hypothetical protein	VPDVFMVFDPEQSGTtPLSR	TGGT1_214880T839	NaN	NaN	0.858941	0.837702	0.616402	0.00996551	0.771015
corepressor complex CRC230	AAsFTAENVSFPQSLSR	TGGT1_305340;S49	NaN	NaN	0.841476	0.67154	0.801297	0.00438925	0.771438
putative nucleolar protein 5	HRLsEEAEEEEDEKPR	TGGT1_205510;S469	NaN	0.848459	0.874935	0.778364	0.584778	0.00131655	0.771634
hypothetical protein	KPLLENAEPTIEVDsP	TGGT1_246450;S250	NaN	NaN	0.802249	0.722798	0.790458	0.00102698	0.771835
hypothetical protein	RDsREVVGR	TGGT1_247450;S98	NaN	NaN	0.760991	0.648975	0.905544	0.00913099	0.771837
WD domain, G-beta repeat-containing protein	REGTGTAsRER	TGGT1_213060;S2631	NaN	NaN	0.856678	1.01525	0.444237	0.0453108	0.772055
hypothetical protein	SHERsTEGPR	TGGT1_206670;S1557	NaN	NaN	0.763544	0.68942	0.863382	0.00423399	0.772115
hypothetical protein	LEQHsAILHHPGSVWIPSVPK	TGGT1_248740;S1036	NaN	NaN	0.634505	0.749481	0.93242	0.0123868	0.772135
cyclic nucleotide-binding domain-containing protein	DsSGNQDVEHR	TGGT1_295850;S1766	NaN	NaN	0.883744	0.613628	0.82008	0.0109556	0.772484
hypothetical protein	EAEEAsEDERETLACGPR	TGGT1_270790;S209	NaN	0.978374	0.604821	0.861111	0.64635	0.00317732	0.772664
transporter, major facilitator family protein	EMCHDLsEEAPGRPHEAESAGSK	TGGT1_320020;S340	0.65097	NaN	0.732353	0.837494	0.870765	0.000595798	0.772895
HECT-domain (ubiquitin-transferase) domain-containing protein	ERsREAGAENEGATPGEASEKPR	TGGT1_291980;S116	NaN	NaN	0.810287	0.752025	0.757559	0.000576012	0.77329
hypothetical protein	QIERsGAK	TGGT1_254000;S352	NaN	NaN	0.759298	0.711	0.849885	0.00275896	0.773394
hypothetical protein	AVGVGGLRQDsELSR	TGGT1_220510;S129	NaN	NaN	0.731112	0.638259	0.95173	0.0141316	0.7737
hypothetical protein	KAsVEENLK	TGGT1_268990;S1206	NaN	NaN	0.871508	0.756778	0.696111	0.0043769	0.774799
zinc finger (CCCH type) motif-containing protein	GRsLQsDPEGERDTSR	TGGT1_202900;S893; ;S896	0.810533	NaN	0.639558	0.811	0.838604	0.000443714	0.774924
dense granule protein GRA5	RAIQEESKEsAtAEEEEVAEEE	TGGT1_286450;S108;T110	NaN	NaN	0.790576	0.75755	0.776973	0.000152849	0.775033
zinc finger (CCCH type) motif-containing protein	VPAAIQELVSTSTTLLGsGGR	TGGT1_218300;S603	NaN	NaN	0.673913	0.882077	0.769437	0.00596956	0.775142
hypothetical protein	TAEEIEEDALsAQFPsFAEDTPR	TGGT1_241000;S221; ;S226	NaN	NaN	0.771758	0.800683	0.753673	0.000311607	0.775371
hypothetical protein	GAGERPGsRR	TGGT1_239410;S2409	NaN	NaN	0.627268	0.703004	0.996167	0.0203999	0.77548
hypothetical protein	APsPEALAEPK	TGGT1_258090;S280	NaN	0.503026	0.872163	0.8612	0.865625	0.00337827	0.775504
CDP-alcohol phosphatidyltransferase superfamily protein	EANtEDENIPDVAVSSR	TGGT1_261760T429	NaN	NaN	0.75837	0.754538	0.814131	0.00061579	0.77568
hypothetical protein	RENsFEEDEQERK	TGGT1_248940;S245	0.752241	0.0194945	1.10217	1.01918	0.986455	0.0172153	0.775908
hypothetical protein	AAGsVVLVRPK	TGGT1_315610;S36	NaN	0.995659	0.593322	0.642714	0.872285	0.00385645	0.775995
putative histone lysine methyltransferase, SET	EANSsDAEASEASSAR	TGGT1_201250;S1622	NaN	NaN	0.906826	0.81118	0.610054	0.0124639	0.77602
hypothetical protein	GLSLLEIVKYtPR	TGGT1_283550T486	NaN	NaN	0.640469	0.92436	0.763324	0.0110336	0.776051
hypothetical protein	VFDDVETHsDSR	TGGT1_253140;S71	NaN	NaN	0.858929	0.879727	0.591151	0.0140157	0.776602
hypothetical protein	EDAsRQAtGEQHVEEDAKPSAADVDESR	TGGT1_221870;S1029;T1033	NaN	NaN	0.794104	0.724076	0.812531	0.00120064	0.776904
hypothetical protein	RPGGPDCEEAAPAEPATSLGsKELGR	TGGT1_238390;S448	NaN	0.294915	1.07765	0.885088	0.850297	0.019121	0.776987
hypothetical protein	RADsEGQTEKQPEEAFPESR	TGGT1_240220;S1160	0.937347	NaN	0.832831	0.625881	0.711948	0.00145406	0.777002
hypothetical protein	VYTDNEIHsDGGHsVECPPPGsPIPQTTTFTSQAAPALQPR	TGGT1_226570;S43; ;S48; ;S56	NaN	NaN	0.879385	0.845486	0.606821	0.0119584	0.777231
tetrahydrofolate dehydrogenase/cyclohydrolase, NAD(P)-binding domain-containing protein	FLDASPEVDGVILLsPVGR	TGGT1_257625;S252	NaN	NaN	0.681236	0.768543	0.882029	0.00554628	0.777269
hypothetical protein	YRVDtASLLGTR	TGGT1_220240T175	NaN	NaN	0.817703	0.635551	0.878681	0.00871261	0.777312
hypothetical protein	GGVFNNEVNFASAAAsPAHFATATTTR	TGGT1_289970;S173	NaN	NaN	0.592707	0.713555	1.02911	0.0268091	0.778457
putative cell-cycle-associated protein kinase CDK	NHDDAGVVLGGsDDGR	TGGT1_249260;S1495	NaN	NaN	0.879524	0.796759	0.659556	0.00671858	0.778613
hypothetical protein	GAVGGAGWGATAGEGDTGsPR	TGGT1_226620;S3652	NaN	NaN	0.927	0.87271	0.536321	0.0237491	0.778677
hypothetical protein	ATNREPVsPR	TGGT1_236930;S1412	NaN	NaN	0.83341	0.729335	0.773609	0.00149593	0.778785
hypothetical protein	HSDDAGGsPQNR	TGGT1_246090;S628	0.823893	NaN	0.771171	0.959244	0.561898	0.00251797	0.779051
alveolin domain containing intermediate filament IMC1	ALQQLHGTQESVRsVTLEER	TGGT1_231640;S68	NaN	0.862922	0.526503	0.577239	1.15142	0.0124579	0.779521
ubiquitin carboxyl-terminal hydrolase	ATLEQDDEDSPAFPFsPR	TGGT1_277895;S373	NaN	NaN	0.913793	0.689655	0.735345	0.0076061	0.779598
putative eukaryotic initiation factor-3 subunit 10	ESAAGASAsPK	TGGT1_201680;S115	NaN	0.686686	0.945946	0.821274	0.666489	0.0012494	0.780099
hypothetical protein	SLGDSFRQEsPPRQEQTPQPQLGQLPR	TGGT1_280370;S216	NaN	0.943857	0.870099	0.765665	0.541575	0.00298113	0.780299
zinc finger (CCCH type) motif-containing protein	SRsPDRGGLGPFR	TGGT1_268570;S370	NaN	NaN	0.740072	0.747886	0.852955	0.00216844	0.780304
splicing factor SF2	VRGDDFsEETRR	TGGT1_319530;S392	1.03827	0.727826	0.592853	0.727735	0.816115	0.000448607	0.780561
putative IWS1 transcription factor	EVsREEAR	TGGT1_227560;S93	NaN	NaN	0.719965	0.827513	0.79429	0.0016548	0.780589
hypothetical protein	sVEHPGVWGEAER	TGGT1_230000;S6583	NaN	NaN	0.83705	0.738269	0.767562	0.00140386	0.78096
hypothetical protein	GINRQPsLELEPLAEDEMR	TGGT1_257380;S135	0.660438	0.656502	0.953301	0.758389	0.878884	0.000188747	0.781503
rhoptry protein ROP18	RRsELVFEK	TGGT1_205250;S187	NaN	0.38609	0.833203	0.901414	1.0054	0.0105716	0.781527
eIF2 kinase IF2K-A (incomplete catalytic triad)	SQTSHLsSEAK	TGGT1_229630;S3809	NaN	NaN	0.74271	0.75225	0.850075	0.00192092	0.781678
MCM2/3/5 family protein	AAEDADEGEEIASQLQSLDLsDGSKK	TGGT1_216730;S921	NaN	NaN	0.905874	0.84266	0.597166	0.0141918	0.7819
DNA-directed RNA polymerase I RPA1	EAPAsPAK	TGGT1_244880;S214	NaN	0.674222	0.836839	0.898645	0.718168	0.000634128	0.781968
hypothetical protein	ASVSPtPPLVR	TGGT1_263660T95	NaN	NaN	0.723992	0.765938	0.857567	0.00253064	0.782499
transketolase	KVsPGKTELGATDVLCVNTIR	TGGT1_318310;S25	NaN	NaN	0.876448	0.591288	0.880181	0.0146193	0.782639
GNS1/SUR4 family protein	AEAQTAAGEAFsPASK	TGGT1_253880;S321	NaN	NaN	0.784218	0.811295	0.753367	0.000456492	0.78296
hypothetical protein	AAVARPGsPTR	TGGT1_311230;S2869	NaN	0.475288	0.830219	0.931021	0.895735	0.00494998	0.783066
UBA/TS-N domain-containing protein	AAAEEESGsAQGK	TGGT1_232180;S308	NaN	NaN	0.771838	0.754607	0.823293	0.000693166	0.783246
putative hypoxia- inducible factor prolyl hydroxylase (phd2)	ELDsQSEGEKER	TGGT1_214620;S43	NaN	NaN	0.92365	0.708759	0.71753	0.00793931	0.783313
hypothetical protein	ETVNTPEAPQATAAPAAAtASPAR	TGGT1_230940T327	NaN	NaN	0.686359	0.756539	0.908059	0.00689691	0.783652
Na+/H+ exchanger NHE1	SQALPVEAETNQsPVISQAPSVVFHSQPVGHTEGGLSHR	TGGT1_259200B;S282	NaN	NaN	0.77122	0.671781	0.907989	0.00754764	0.783663
leucine rich repeat-containing protein	LKEQQYQLCAEDSTDWEKtPR	TGGT1_304670T139	NaN	NaN	1.0185	0.742272	0.590332	0.0246317	0.783701
hypothetical protein	HSRHsPDCR	TGGT1_248940;S444	NaN	NaN	0.632774	1.04968	0.668846	0.0277539	0.783767
histone H3.3	YRPGtVALR	TGGT1_218260T46	NaN	NaN	0.756264	0.675986	0.919108	0.0082238	0.783786
ATG C terminal domain-containing protein	VSSHTDsTHEDDRLSGHSPSGGR	TGGT1_304630;S540	0.926476	NaN	0.712632	0.77571	0.721596	0.00054567	0.784103
DnaJ domain-containing protein	RTDGsPAFsDGEDAEEsGDEMGTGSR	TGGT1_232050;S69;;S73;;S81	0.870059	NaN	0.687114	0.779442	0.800885	0.000243754	0.784375
hypothetical protein	GMTVtPPQAMVDEHGYANNGSK	TGGT1_263320T359	NaN	NaN	0.762086	0.660667	0.930414	0.00990817	0.784389
hypothetical protein	ACVGAHLPsR	TGGT1_262935;S291	NaN	NaN	0.731822	0.785539	0.83588	0.00146378	0.784414
dense granule protein GRA14	VQPtAPPAPAsMLYPsLHR	TGGT1_239740T385;;S392;;S397	NaN	NaN	0.686538	0.814709	0.852028	0.00405682	0.784425
glycerol-3-phosphate-acyltransferase	RLDSSPLPTAAAPGGRtPETAGAVCELDR	TGGT1_256980T353	NaN	NaN	0.762583	0.761697	0.829594	0.000820296	0.784625
hypothetical protein	DRGEQGEDEEDKDNAGDLLTPSAPSEAGDsPR	TGGT1_261450;S372	NaN	NaN	0.761881	0.728389	0.863658	0.00267629	0.784643
hypothetical protein	LLsFDELFK	TGGT1_209600;S83	NaN	NaN	0.654979	0.763685	0.935404	0.0106494	0.784689
AP2 domain transcription factor AP2XII-4	DAVPLAsSPSSSSPALR	TGGT1_247700;S1962	NaN	NaN	0.821138	0.744784	0.78911	0.000794243	0.785011
rhoptry protein ROP12	AQLFSTDEGPVsESASKLDAELEEK	TGGT1_203990;S46	NaN	NaN	0.831854	0.667749	0.855751	0.00561651	0.785118
trehalose-phosphatase	GDHGVEGDDDVsVAALDKEEVDAR	TGGT1_297720;S124	NaN	NaN	0.776028	0.927598	0.652525	0.0101026	0.785384
Ulp1 protease family, C-terminal catalytic domain-containing protein	RMDsRDGVASADR	TGGT1_214470;S231	NaN	NaN	0.791946	0.694985	0.869487	0.00410456	0.785473
hypothetical protein	ANAEGtSLAItR	TGGT1_220950T294;T299	0.930715	NaN	0.583186	0.680092	0.94921	0.00329315	0.785801
putative histone lysine methyltransferase, SET	ESDIEAGAQsPLLVIPPPR	TGGT1_201250;S45	NaN	NaN	0.866966	0.816021	0.675272	0.00527607	0.786086
rhoptry neck protein RON4	KRHPtPASR	TGGT1_229010T229	NaN	NaN	0.787765	0.654349	0.916226	0.00912263	0.786113
dense granule protein GRA5	AIQEEsKEsAtAEEEEVAEEE	TGGT1_286450;S105;;S108;T110	NaN	NaN	0.806719	0.723037	0.828747	0.00167331	0.786168
dense granule protein GRA7	GTDDHLTTSMDKAsVESQLPR	TGGT1_203310;S77	1.07838	0.356322	0.645072	0.856626	0.994754	0.00378189	0.786231
putative nucleolar GTP-binding protein 1	RGRsPSAGSADGDEADGHSR	TGGT1_261520;S599	NaN	NaN	0.661827	0.915439	0.782007	0.00856314	0.786424
putative trichohyalin	SADWsEEENEEESSHPAAVIR	TGGT1_242790B;S307	0.736945	0.732524	0.853528	0.88101	0.729298	1.8847e-05	0.786661
hypothetical protein	TTHLsPQESLCSR	TGGT1_205130;S4466	NaN	0.96989	0.773296	0.671062	0.733126	0.001188	0.786844
hypothetical protein	RSsLPGEETSR	TGGT1_209500;S619	0.83168	NaN	0.815134	0.736426	0.764442	4.86296e-05	0.786921
tetratricopeptide repeat-containing protein	ASFASTYTVSsAGEAFSLR	TGGT1_229490;S557	NaN	NaN	0.815271	0.784113	0.761481	0.000392364	0.786955
histidine acid phosphatase superfamily protein	KIQLKPIEWEETGsPR	TGGT1_304650;S817	NaN	NaN	0.872296	0.835022	0.654776	0.00719756	0.787365
histone H2AX	GKHGVsQEF	TGGT1_261580;S132	NaN	1.08094	0.59381	0.479288	0.995686	0.0129101	0.78743
hypothetical protein	ASSETsMDCFENQNFYR	TGGT1_293360;S28	NaN	NaN	0.734781	0.675368	0.952335	0.0112361	0.787495
hypothetical protein	SAVDLTSASAGGHsPSGYSRPQQLPIR	TGGT1_225690;S142	NaN	NaN	0.653493	0.883944	0.825544	0.00762367	0.78766
RNA recognition motif-containing protein	RAHsREGEEER	TGGT1_292200;S884	NaN	NaN	0.601377	0.735456	1.02639	0.0244338	0.787741
hypothetical protein	GGAEsDGERK	TGGT1_242780;S3262	NaN	NaN	0.821518	0.947639	0.594343	0.0167831	0.787833
hypothetical protein	GVERPRDGsEEEEDDRGNATASSGSR	TGGT1_220570;S628	0.898833	0.933498	0.627778	0.77576	0.703341	0.000165911	0.787842
hypothetical protein	EETSFsEGPIsPDAAAEAEILSPLILPSR	TGGT1_305250;S13; ;S18	NaN	NaN	0.728742	0.740741	0.895948	0.00463148	0.788477
hypothetical protein	LGLHTAGsEDAAR	TGGT1_226900;S105	NaN	NaN	0.687887	0.814235	0.864094	0.00439123	0.788739
hypothetical protein	RTEEQKAEGDsEEESTR	TGGT1_246090;S47	0.907172	NaN	0.857057	0.760189	0.631579	0.000982975	0.788999
phosphoserine phosphatase	HACsEEK	TGGT1_222900;S1177	NaN	NaN	0.701543	0.744905	0.921452	0.00718155	0.7893
hypothetical protein	GVsWGESVDDSPESDARPAASPLEK	TGGT1_304520;S84	NaN	NaN	0.818568	0.872316	0.677507	0.00537046	0.789464
hypothetical protein	DAALSADQEEAVsGLRSGPSSVDWGEVEQR	TGGT1_250820;S275	NaN	NaN	0.653262	0.897788	0.817891	0.00820867	0.789647
hypothetical protein	AGsEEDGKR	TGGT1_242780;S3704	NaN	NaN	0.913022	1.00873	0.447622	0.0449281	0.789791
Sec61beta family protein	VTAGGGASsAAGQRsR	TGGT1_211040;S37;;S43	NaN	NaN	0.679931	0.916848	0.77551	0.00748835	0.790763
putative cyclin 4	sHTESHSGSSSAHPR	TGGT1_264690;S526	NaN	NaN	0.571705	0.745575	1.05622	0.0306177	0.791167
hypothetical protein	VGsEVGDTEGGDGCSLADKFR	TGGT1_246720;S297	NaN	0.834934	0.970657	0.897682	0.461804	0.0060212	0.791269
hypothetical protein	VsDSDLSR	TGGT1_240570;S473	NaN	0.799756	0.748357	0.678414	0.938962	0.000732486	0.791372
SAG-related sequence SRS34A	TVDAPSSGsVVFQCGDK	TGGT1_271050;S52	NaN	NaN	0.712718	0.723689	0.937905	0.00846949	0.791437
tetratricopeptide repeat-containing protein	GLsLPLPALPASAAASLVTVR	TGGT1_262700;S411	NaN	NaN	0.708618	0.925373	0.740642	0.00720421	0.791544
hypothetical protein	REsEGNVQVSR	TGGT1_290620;S387	NaN	NaN	0.8875	0.812922	0.675483	0.00609123	0.791968
hypothetical protein	NPFSDEEAAEPFLEQAGEsR	TGGT1_311220;S861	NaN	0.561312	0.904784	0.811084	0.892218	0.00217017	0.79235
hypothetical protein	QATTTMFGIPsRFFEsKEGFR	TGGT1_316340;S104;;S109	NaN	NaN	0.731221	0.816032	0.830169	0.00151663	0.792474
SNARE associated Golgi protein	TSsDSEAPREER	TGGT1_279370;S79	NaN	NaN	0.707483	0.974167	0.696309	0.0128734	0.792653
hypothetical protein	HALVERENsVSFGEK	TGGT1_262450;S798	NaN	NaN	0.769452	0.82002	0.790206	0.000342118	0.793226
TFIIH basal transcription factor complex helicase XPB subunit	SAEPGDTAPGAVTAVAGHLAsPGASGDGDPSETR	TGGT1_269660;S355	NaN	NaN	0.769953	0.901376	0.708444	0.00510585	0.793258
hypothetical protein	SLsKEDSDFLQNAIR	TGGT1_273905;S28	NaN	0.617782	0.902462	0.839029	0.814126	0.00100095	0.79335
hypothetical protein	QQPVEANETtVER	TGGT1_293430T79	0.683997	NaN	0.72669	0.790604	0.972376	0.00110745	0.793417
hypothetical protein	AEVGRGDsGHLASR	TGGT1_268780;S4667	NaN	NaN	0.726363	0.82173	0.83222	0.00179633	0.793438
hypothetical protein	SNSVLMETDYREDGTGSPsPR	TGGT1_231220;S328	0.679616	NaN	0.840199	0.740157	0.913876	0.000612329	0.793462
hypothetical protein	KVsANDALETVER	TGGT1_205130;S4389	NaN	NaN	0.599444	0.713553	1.06749	0.0301144	0.793496
hypothetical protein	LSPPSGAVVASLTGNATTSAPSGVQsPK	TGGT1_250820;S663	NaN	0.559382	0.866399	0.877434	0.870835	0.00202972	0.793513
hypothetical protein	GGsDVLQCVLGQDVLSK	TGGT1_219460;S1213	NaN	NaN	0.698363	0.71875	0.964119	0.0113762	0.793744
putative translation initiation factor IF-2	KSEREsDNSDEELK	TGGT1_214270;S150	NaN	NaN	0.72956	0.71152	0.941935	0.00856314	0.794338
putative DNA topoisomerase 2	KAHSsLESTPTTK	TGGT1_312230;S1572	NaN	NaN	0.879614	0.833789	0.67034	0.00632872	0.794581
Sec7 domain-containing protein	SPsPQSSPQR	TGGT1_232190;S28	NaN	NaN	0.794574	0.761094	0.82853	0.000599484	0.794733
hypothetical protein	GILAIEEsDGTAGDALEDPALGE	TGGT1_247380;S1092	NaN	NaN	0.695811	0.976099	0.712401	0.0127997	0.79477
hypothetical protein	REGYTPAAAAAAAASAsPR	TGGT1_305810;S313	NaN	0.55191	0.845153	0.862762	0.920833	0.00238597	0.795164
putative autophagy-related cysteine peptidase atg4	GNSDGDRDsDATGAK	TGGT1_206450;S3000	NaN	NaN	0.855868	0.808747	0.721253	0.00245012	0.795289
SAG-related sequence SRS52A	LADVLPSATFQETSsAHVFSVK	TGGT1_315320;S251	NaN	NaN	0.712022	0.883356	0.790833	0.00385249	0.795404
putative heat shock protein 90	SLPIDEsEKAAAPLTAEEQEAVQK	TGGT1_244560;S66	NaN	NaN	0.86055	0.959959	0.565815	0.0214264	0.795441
Ulp1 protease family, C-terminal catalytic domain-containing protein	GVQTPMAAGAGSAsPAFLPEVDEDLR	TGGT1_214470;S209	NaN	NaN	0.800895	0.723644	0.862286	0.00253191	0.795608
Na+/H+ exchanger NHE3	ETGVEDPFtEEDFDDVR	TGGT1_305180T1448	NaN	NaN	0.924225	0.762299	0.703965	0.00676751	0.79683
dense granule protein GRA14	VQPTAPPAPAsMLYPSLHR	TGGT1_239740;S392	NaN	0.752458	0.866346	0.821872	0.746764	0.000103341	0.79686
putative cell-cycle-control protein (translation regulation)	GEDRPRsREDGVR	TGGT1_320430;S294	NaN	NaN	0.749557	0.748936	0.892681	0.00357894	0.797058
hypothetical protein	RDETHHAGAsESRR	TGGT1_212960B;S305	NaN	NaN	0.682028	0.824926	0.884504	0.00563183	0.797153
surface antigen repeat-containing protein	RLsFQQDFTCGIER	TGGT1_212880;S252	NaN	NaN	0.857783	0.892451	0.641335	0.0095739	0.79719
MIF4G domain-containing protein	SRADsAHSSSPR	TGGT1_269180;S1783	0.786099	NaN	0.639085	0.678478	1.08606	0.00424707	0.797431
hypothetical protein	RDAELHVTHsPQAR	TGGT1_209500;S2678	NaN	NaN	0.823755	0.737414	0.831169	0.00142095	0.797446
alveolin domain containing intermediate filament IMC1	ALQQLHGtQESVR	TGGT1_231640T62	NaN	NaN	0.694225	0.725555	0.972642	0.0119721	0.797474
RNA recognition motif-containing protein	KSMEPASGVSSLQsRER	TGGT1_320100;S504	NaN	NaN	0.845731	0.712937	0.834365	0.00282632	0.797678
RecF/RecN/SMC N terminal domain-containing protein	GRGsGTEGGSGEGTR	TGGT1_309400;S326	NaN	NaN	0.705385	0.948337	0.7397	0.00893299	0.797807
hypothetical protein	ATGAGELEsDRTRPEEEK	TGGT1_232120;S1299	NaN	NaN	0.884085	0.845801	0.664203	0.00714499	0.79803
hypothetical protein	APsSGGTDATENR	TGGT1_320160B;S84	NaN	NaN	0.672079	0.80467	0.91758	0.00780942	0.79811
hypothetical protein	RVsSALEYFPTAPVR	TGGT1_248420;S54	NaN	NaN	0.997499	0.719618	0.679004	0.0153419	0.798707
putative membrane protein C17G8.08c	HAPPSAADAsDEAASPLK	TGGT1_319550;S211	NaN	NaN	0.67313	0.739048	0.984902	0.0138048	0.799027
putative E3 ubiquitin-protein ligase	VSGEDsPRR	TGGT1_294280;S414	NaN	NaN	0.827609	0.875	0.695675	0.00447363	0.799428
hypothetical protein	ESsVSMGVVQEINDPEGDSHWHDRDR	TGGT1_311480;S266	NaN	NaN	0.8734	0.73023	0.795677	0.00266635	0.799769
domain K- type RNA binding proteins family protein	RASsVGRR	TGGT1_235930;S59	NaN	NaN	0.677729	0.594872	1.12752	0.0402181	0.80004
hypothetical protein	GAGRDPsANR	TGGT1_279320;S4455	NaN	NaN	0.774498	0.900052	0.726034	0.00417264	0.800195
zinc finger (CCCH type) motif-containing protein	DKEEESEAsGFTTPSAGR	TGGT1_218300;S409	NaN	NaN	0.84087	0.765006	0.794906	0.000759234	0.800261
RNA recognition motif-containing protein	RSsEGRGESAPLPR	TGGT1_304760;S469	0.776839	0.912067	0.769037	0.750712	0.79468	9.86365e-06	0.800667
hypothetical protein	GQDANAPEsAAETAPPR	TGGT1_307810;S281	0.454551	NaN	0.899845	0.99197	0.857143	0.00666895	0.800877
hypothetical protein	GASVLPHAEsLPEAALHPTLPPK	TGGT1_239400;S952	NaN	NaN	0.749131	0.752141	0.90148	0.0039193	0.800917
WD domain, G-beta repeat-containing protein	FGFFPPPsPFEGK	TGGT1_311400;S1112	NaN	NaN	0.94728	0.958838	0.497214	0.0341593	0.801111
NAD(+)/NADH kinase domain-containing protein	EVHRsPGASR	TGGT1_244700;S861	NaN	NaN	0.797432	0.93367	0.674141	0.00862635	0.801748
regulator of chromosome condensation (RCC1) repeat-containing protein	ADHsGREEEATDQTK	TGGT1_313860;S2340	0.695151	NaN	0.824333	0.905527	0.783075	0.000354693	0.802022
nuclear factor NF2	GLSADSDDAsDKVSETKS	TGGT1_286790;S305	NaN	NaN	0.789103	0.725844	0.891917	0.00361851	0.802288
hypothetical protein	REGsGEETR	TGGT1_297210;S3656	NaN	NaN	0.82436	0.972321	0.611111	0.016638	0.802597
hypothetical protein	GGDNYSSAAPsEIsDGLTGR	TGGT1_250820;S1023; ;S1026	NaN	NaN	0.713137	0.829646	0.865358	0.00326212	0.802714
hypothetical protein	RHDAGEQEGEGDAsPERR	TGGT1_313590A;S629	NaN	NaN	0.667411	1.05019	0.691696	0.0229283	0.803099
dense granule protein GRA5	DVGsGGDDsEGAR	TGGT1_286450;S33;;S38	0.912962	NaN	0.753927	0.778257	0.767922	0.000212224	0.803267
putative autophagy-related 12 variant 1	RSEsREQEASNTPEDR	TGGT1_321300;S172	NaN	NaN	0.801309	0.872172	0.736668	0.00236396	0.803383
putative kinesin heavy chain	TIDKLNsGDIYSGDVSGVSLTK	TGGT1_273560;S570	NaN	NaN	0.879839	0.747725	0.782812	0.0024095	0.803459
RNA recognition motif-containing protein	GVAQtPPR	TGGT1_265250T940	NaN	NaN	0.86019	0.840288	0.710234	0.00340648	0.803571
hypothetical protein	KSPsVGVSTSSSHAVR	TGGT1_203780;S65	NaN	NaN	0.687338	0.883025	0.840479	0.00542305	0.803614
Sec61beta family protein	RVtAGGGASSAAGQR	TGGT1_211040T30	NaN	0.840128	0.684256	0.791467	0.89881	0.000394362	0.803665
AMP deaminase	SEsFEVLDGPSR	TGGT1_234280;S1027	0.817787	NaN	0.746538	0.894498	0.755857	0.000168191	0.80367
hypothetical protein	AsPAGSPVFAGQVPAQVK	TGGT1_201760;S244	NaN	NaN	0.880833	0.931937	0.598805	0.0162016	0.803858
hypothetical protein	sSsGGTEPRPGVSGAGAGAK	TGGT1_313370;S509;;S511	NaN	NaN	0.760699	0.853645	0.797311	0.00112882	0.803885
phosphatidate cytidylyltransferase	SGLEsPAFGVSHGGADGPGAGLSGIR	TGGT1_281980;S336	NaN	NaN	0.848028	0.783421	0.780526	0.000750232	0.803992
hypothetical protein	VVHVPsPSR	TGGT1_230340;S302	NaN	NaN	0.720298	0.856319	0.836428	0.00276921	0.804348
sodium/hydrogen exchanger NHE2	LEsRDFGVPSQLGDWTHGLVSTIK	TGGT1_299060;S550	NaN	NaN	0.842896	0.903872	0.666667	0.00772468	0.804478
hypothetical protein	GVADsGGNK	TGGT1_247520;S102	NaN	NaN	0.674051	0.64636	1.09368	0.0308517	0.804697
eIF2 kinase IF2K-A (incomplete catalytic triad)	SAsADSFSPTKKPER	TGGT1_229630;S3872	NaN	NaN	0.78502	0.709899	0.91954	0.00575547	0.80482
tetratricopeptide repeat-containing protein	GAGEDsVAQAAVQK	TGGT1_247000;S666	NaN	NaN	0.870032	0.658307	0.886708	0.00823603	0.805016
hypothetical protein	GIHPDAAsER	TGGT1_290700;S245	NaN	0.50378	0.989049	1.01885	0.709764	0.00712162	0.805361
hypothetical protein	VSsVGGTGLDSSECK	TGGT1_292950;S1797	NaN	NaN	0.803672	0.841945	0.771128	0.000644764	0.805582
hypothetical protein	VKsPQVQSPGSR	TGGT1_253140;S1348	NaN	NaN	0.972987	0.826424	0.617764	0.0159715	0.805725
RNA helicase (UPF2 interacting domain) protein	AIAGGGAFASRPFPTETADAGTAtPGAGK	TGGT1_291820T1463	NaN	NaN	0.878313	0.908465	0.631096	0.011677	0.805958
TFIIH basal transcription factor complex helicase XPB subunit	ASsPPAAK	TGGT1_269660;S24	NaN	NaN	0.844131	0.820184	0.753778	0.00112232	0.806031
adapter-related protein	GAGsEDARGEASER	TGGT1_244290;S915	NaN	NaN	0.801047	0.74665	0.871983	0.00201778	0.80656
hypothetical protein	APSsAPHsGTEGR	TGGT1_257430;S1072; ;S1076	NaN	NaN	0.719112	0.860675	0.84035	0.00298737	0.806712
RNA recognition motif 2 protein	RAsGTPSK	TGGT1_313910;S661	NaN	NaN	0.837121	0.841794	0.74133	0.00164259	0.806748
OTU family cysteine protease	AEsPRDDTHEITHR	TGGT1_258780;S19	0.824286	NaN	0.891304	0.737054	0.77439	0.000155091	0.806758
transporter, major facilitator family protein	IRsSETSSVEGLPQFR	TGGT1_253700;S620	NaN	NaN	0.88861	0.724282	0.807501	0.00343947	0.806798
signal recognition particle 14kd protein	KCsAGEAGK	TGGT1_256050;S136	0.819451	0.772544	0.806527	0.786557	0.849635	4.52106e-07	0.806943
zinc finger (CCCH type) motif-containing protein	SAGESHGLSLTQGGAsPGAGGLGGESR	TGGT1_202900;S948	NaN	NaN	0.766285	0.780009	0.874591	0.00177528	0.806962
hypothetical protein	SSVGQRGDsPsPK	TGGT1_262935;S160;;S162	NaN	NaN	0.881964	0.839154	0.700131	0.0045928	0.807083
hypothetical protein	DVGSRsDEFDR	TGGT1_307810;S295	0.658258	0.722874	0.951471	0.898822	0.804795	0.00011739	0.807244
regulator of chromosome condensation (RCC1) repeat-containing protein	ASSsAGEEERPVR	TGGT1_313860;S2260	0.937515	NaN	0.712601	0.662596	0.916567	0.00139966	0.80732
calcium-dependent protein kinase CDPK3	NPHsKHAGAAGEKPDASLEK	TGGT1_305860;S11	NaN	NaN	0.828993	0.578597	1.0144	0.0236002	0.80733
hypothetical protein	APALGGEsPR	TGGT1_228150;S306	0.778024	0.861164	0.821849	0.822445	0.753456	1.77229e-06	0.807387
cyclic nucleotide-binding domain-containing protein	RTPsKEEQSK	TGGT1_295850;S1850	NaN	NaN	1.04781	0.640274	0.734785	0.022472	0.807623
ATG C terminal domain-containing protein	RASEAsPERPHETR	TGGT1_304630;S4026	0.772244	NaN	0.783593	0.826431	0.849089	2.44848e-05	0.807839
dense granule protein GRA14	IMEDHVASVVAGEAQEENVINsQPQGTETSHR	TGGT1_239740;S253	NaN	0.599274	0.899519	0.824737	0.90811	0.0015187	0.80791
hypothetical protein	EESQSGEGTsSRR	TGGT1_250820;S1052	NaN	0.920314	0.69571	0.804867	0.811045	0.000398727	0.807984
hypothetical protein	EKETEEsTHER	TGGT1_242700;S1323	NaN	NaN	0.901093	0.75	0.773029	0.00336596	0.808041
hypothetical protein	GVASGVQTLQsWTSLR	TGGT1_229640;S683	NaN	NaN	0.796978	0.897601	0.729984	0.00361294	0.808188
PHD-finger domain-containing protein	GTLAsPTGVAAPFGDPLENSPQNLFEANASK	TGGT1_224260;S3823	NaN	0.890016	0.624632	0.8026	0.915879	0.001164	0.808282
bromodomain-containing protein	SGsSDREsGEETGNTKGEK	TGGT1_263580;S616; ;S621	NaN	NaN	0.658462	0.847077	0.919346	0.00913003	0.808295
putative adenine nucleotide translocator	MLIQTQDsIPEIK	TGGT1_249900;S57	NaN	NaN	0.593537	0.721186	1.11058	0.0350639	0.808434
hypothetical protein	GTGYVPGSASLGGGIVAGTMPGLLTGsLR	TGGT1_260520;S513	NaN	NaN	0.73379	0.991643	0.700125	0.0127222	0.808519
hypothetical protein	ATTEGTAIsREEEEERER	TGGT1_273320;S209	NaN	NaN	0.81295	0.823151	0.790073	0.000146203	0.808725
hypothetical protein	EATTNPTVsPK	TGGT1_229470;S54	NaN	0.61193	1.02354	0.884909	0.714858	0.00300852	0.808809
hypothetical protein	EVRHsREAETR	TGGT1_306400;S368	NaN	NaN	0.693423	0.812091	0.921364	0.00655495	0.808959
hypothetical protein	LPWISPTHPSVVAsPPSSPVPEGLLR	TGGT1_209500;S155	NaN	NaN	0.827586	0.832182	0.768025	0.000651257	0.809264
putative hypoxia- inducible factor prolyl hydroxylase (phd2)	ELDsQsEGEKER	TGGT1_214620;S43;;S45	NaN	NaN	0.757914	0.886616	0.784741	0.00233552	0.809757
hypothetical protein	SEDLEsEGDEQKLDLETR	TGGT1_310170;S726	NaN	NaN	0.922894	0.87896	0.627578	0.0126605	0.809811
phosphatidate cytidylyltransferase	SRsGLESPAFGVSHGGADGPGAGLSGIR	TGGT1_281980;S332	NaN	NaN	0.834736	0.816335	0.778956	0.000410177	0.810009
phosphatidate cytidylyltransferase	RIsPTDHQVASVR	TGGT1_281980;S276	NaN	NaN	0.881701	0.82243	0.726345	0.00310714	0.810159
hypothetical protein	RQLsNSAAR	TGGT1_248740;S82	0.95989	0.970409	0.761243	0.743664	0.615982	0.000285027	0.810238
hypothetical protein	GLETSAsLETTR	TGGT1_230000;S2334	NaN	NaN	0.903373	0.786236	0.741736	0.00351921	0.810448
hypothetical protein	KGELLtDDEK	TGGT1_202120T216	NaN	NaN	0.944251	0.986942	0.500971	0.0348183	0.810721
hypothetical protein	sSASSPGGDTLTQK	TGGT1_299100;S1320	NaN	NaN	0.907084	0.886686	0.639205	0.011083	0.810992
cyclic nucleotide-binding domain-containing protein	ERGsDGAGK	TGGT1_295850;S2619	NaN	NaN	0.97534	0.74686	0.711239	0.0102447	0.811146
hypothetical protein	TVsTDVGAATGDFESGM	TGGT1_214220;S198	NaN	NaN	0.801798	0.759655	0.872078	0.00163008	0.811177
hypothetical protein	QRRsPPGER	TGGT1_202170;S768	NaN	NaN	0.776513	0.771975	0.885358	0.00208035	0.811282
hypothetical protein	ISPSGVIPCVVIEDLGTGGsNTAK	TGGT1_250820;S514	NaN	NaN	0.837355	0.704425	0.892743	0.0047078	0.811508
AP2 domain transcription factor AP2X-4	GADsEEDEDDRTGGQVVLQWIEK	TGGT1_224050;S406	0.958161	0.762302	0.873222	0.766769	0.699386	6.04734e-05	0.811968
putative SWI2/SNF2 Brahma	VsSSLAPR	TGGT1_278440;S2208	NaN	NaN	0.84474	0.823799	0.767685	0.000801434	0.812075
RNA recognition motif-containing protein	SKsPDFSELR	TGGT1_265250;S468	1.0311	NaN	0.842022	0.665468	0.711346	0.00217943	0.812484
hypothetical protein	GYGRGsLsPR	TGGT1_247450;S764;;S766	0.781542	NaN	0.720743	0.770808	0.977413	0.000728658	0.812626
hypothetical protein	HFLTTAGsPK	TGGT1_269990;S1146	NaN	NaN	0.966605	0.855392	0.616291	0.0157871	0.812763
hypothetical protein	TAsVGANHLQR	TGGT1_283550;S3989	NaN	NaN	0.573607	0.85762	1.00745	0.0236288	0.812892
putative DNA replication licensing factor Mcm7	SAsAAFAEAK	TGGT1_237220;S633	NaN	NaN	0.915598	0.975815	0.547442	0.0260681	0.812952
Ser/Thr phosphatase family protein	RADLsPK	TGGT1_269460;S761	NaN	NaN	0.959342	0.824237	0.655546	0.0114814	0.813042
hypothetical protein	GSFLGsSESLSLGQPGCGGR	TGGT1_313370;S750	NaN	NaN	0.886679	0.777904	0.774561	0.00204547	0.813048
hypothetical protein	MREEDsEREEHEER	TGGT1_262450;S849	NaN	NaN	0.681556	1.03107	0.726804	0.0177317	0.813143
hypothetical protein	sPPRPLIIRPGPSGGAFPGGIEVLPTDFAR	TGGT1_247450;S709	NaN	0.566835	0.877399	0.939686	0.869097	0.00231038	0.813254
putative calcium binding protein precursor	VsLSELEATYVDSLDQK	TGGT1_229480;S134	NaN	NaN	0.65257	0.801705	0.985492	0.0137278	0.813256
hypothetical protein	LLPQHAASDsDNAGNPRDDELLSDIR	TGGT1_289880;S852	NaN	NaN	0.809743	0.744439	0.886202	0.00252649	0.813461
hypothetical protein	ASsTSDVSAMK	TGGT1_239410;S197	NaN	NaN	0.826876	0.807171	0.806644	6.6965e-05	0.813564
hypothetical protein	HVPGPTSPGsAETLPR	TGGT1_305540;S144	NaN	NaN	0.733141	0.787089	0.921207	0.00468673	0.813812
phosphofructokinase domain-containing protein	GEsAGTELSAEGERPASSPGVGEK	TGGT1_281400;S2407	NaN	NaN	0.781119	0.81746	0.84311	0.000487871	0.813896
AP2 domain transcription factor AP2VIII-2	ATPVALSWSDSGGPDEGGEGTLsDGNLCGR	TGGT1_233120;S622	NaN	NaN	0.837407	0.73075	0.873887	0.00277155	0.814015
hypothetical protein	ETGSVsPEGMTSENVK	TGGT1_295080;S152	NaN	NaN	0.823291	0.882594	0.736459	0.00270581	0.814115
hypothetical protein	GSASDTSTPTsPLAK	TGGT1_228770;S221	NaN	NaN	0.804015	0.835669	0.802756	0.000174861	0.814147
RNA-binding protein 8A family protein	RsPSASK	TGGT1_233230;S12	NaN	NaN	0.824903	0.76573	0.852081	0.000978691	0.814238
ABC transporter transmembrane region domain-containing protein	VLLQPTsSLPAAVMSEAESPQVGAFAAFR	TGGT1_239020;S754	NaN	NaN	0.951177	0.814815	0.677158	0.00930319	0.814383
putative P-type ATPase4	VAGHDGEsPRR	TGGT1_278660;S66	0.961945	0.734336	0.63338	0.654258	1.0887	0.000824336	0.814524
RNA recognition motif-containing protein	RAsKGER	TGGT1_209850;S522	NaN	NaN	0.888512	0.818746	0.736318	0.00290343	0.814525
hypothetical protein	GVVtPPPLRPAGLGEVDER	TGGT1_257580T402	NaN	NaN	0.959259	0.934466	0.550048	0.025439	0.814591
RNA recognition motif-containing protein	GSsSGSGGMSR	TGGT1_223930;S259	NaN	1.224	0.709701	0.623297	0.7021	0.00966277	0.814775
adaptin c-terminal domain-containing protein	ATSSSSsPLQGPHDKR	TGGT1_272600;S599	NaN	NaN	0.811685	0.78394	0.849147	0.000537064	0.814924
phospholipid-translocating P-type ATPase, flippase subfamily protein	DSASDRRsEQTHR	TGGT1_247690;S529	NaN	NaN	0.720474	0.764896	0.96	0.00804683	0.815123
hypothetical protein	AAsQEAAEAAVAAVVENLK	TGGT1_254570;S1116	NaN	NaN	0.833696	0.777185	0.834732	0.000543462	0.815204
Rab 5	AYSRPGQSGAsGNAsDLDSR	TGGT1_267810;S21;;S25	NaN	NaN	0.745152	0.799268	0.901559	0.00314872	0.815326
hypothetical protein	SPAPAsPFQDDRER	TGGT1_275990;S240	NaN	1.1366	0.751362	0.67467	0.699131	0.00484829	0.815441
hypothetical protein	QYIHLDALNEDVEPEIKEPsLRPLsQK	TGGT1_236890;S132;;S137	NaN	NaN	1.08484	0.766431	0.595691	0.0295201	0.815654
hypothetical protein	ALTPHDVVDGVVsVGPGPPPRPDGETPR	TGGT1_232000;S181	NaN	NaN	0.886539	0.821944	0.738655	0.00274223	0.815713
hypothetical protein	AVPSGDQPPPQPPPPHsPPR	TGGT1_240060;S274	NaN	0.478422	0.815146	0.842488	1.127	0.00866353	0.815764
hypothetical protein	SAQGsEEEK	TGGT1_264890;S1607	0.870135	0.7615	NaN	NaN	NaN	0.0423241	0.815817
GAP45 protein	VAEHSSAAVTDRsVVGYTVTPCDMAAIDETAK	TGGT1_223940;S192	NaN	NaN	0.762332	0.792822	0.892468	0.00231169	0.815874
hypothetical protein	QIsPPPKPPLSSFR	TGGT1_320160B;S126	NaN	NaN	0.917456	0.825775	0.704831	0.00564532	0.816021
hypothetical protein	APQFFVHPSFVSAASLGsR	TGGT1_229640;S1043	NaN	NaN	0.810198	0.863007	0.775327	0.000973718	0.816177
hypothetical protein	RSCsRGsLDEDESERPTAGK	TGGT1_206670;S1903;;S1906	NaN	NaN	0.76962	0.854217	0.824784	0.000921547	0.816207
Tyrosine kinase-like (TKL) protein	AGsPGAHKEPSPCQDSDAKPR	TGGT1_234970;S555	NaN	NaN	0.785019	0.918239	0.745387	0.00407743	0.816215
histidine acid phosphatase superfamily protein	SEsPGGASVGK	TGGT1_304650;S1943	NaN	NaN	0.975576	0.856729	0.616801	0.0162987	0.816369
hypothetical protein	SRGsDMGER	TGGT1_206670;S1692	NaN	NaN	0.806076	0.811312	0.831894	9.31363e-05	0.816427
hypothetical protein	SsKGHSDAGK	TGGT1_250820;S69	NaN	0.969306	0.863718	0.733186	0.701506	0.000932781	0.816929
putative histone lysine methyltransferase, SET	RAEREtEDENPGK	TGGT1_201250T809	NaN	NaN	1.05232	0.904049	0.494565	0.0392431	0.816978
putative manganese resistance 1 protein	RTLsQPVHKPR	TGGT1_207910;S17	NaN	NaN	0.751051	0.735043	0.964962	0.00812901	0.817019
hypothetical protein	RKEDSsPTEGAAR	TGGT1_209530;S162	NaN	NaN	0.939842	0.923971	0.587302	0.0192281	0.817038
putative CMGC kinase	LRPLEHHPsKGQENR	TGGT1_250850;S1830	NaN	NaN	1.0049	0.885194	0.562102	0.0251897	0.817399
sodium/hydrogen exchanger 3 protein	ETSETSAtPPCR	TGGT1_263480T687	NaN	NaN	0.917127	0.61267	0.923745	0.0153779	0.817847
NAD(+)/NADH kinase domain-containing protein	SEsKESR	TGGT1_244700;S1423	NaN	NaN	1.05421	0.944484	0.455157	0.0471275	0.81795
hypothetical protein	FSFTsPSQTVASLLGK	TGGT1_263200;S732	NaN	NaN	0.676647	0.657909	1.11947	0.0323564	0.818009
hypothetical protein	ERsGsAQKNEAR	TGGT1_247450;S437;;S439	NaN	NaN	0.806811	0.769602	0.87885	0.00153167	0.818421
MORN repeat-containing protein	ETEGQSKVPsTQ	TGGT1_207830;S364	NaN	NaN	0.749782	0.738474	0.967054	0.00815842	0.818437
CBF/Mak21 family protein	LGEPGGSFVsAEGLEDLLKG	TGGT1_313990;S1351	NaN	NaN	0.6875	0.793598	0.974359	0.0103057	0.818486
hypothetical protein	SRsVEIQHEQR	TGGT1_306020;S6745	NaN	NaN	0.848598	0.741821	0.865295	0.00222502	0.818571
AP2 domain transcription factor AP2XII-1	EAsTPPAAK	TGGT1_218960;S459	NaN	NaN	0.873897	0.851126	0.730918	0.00292261	0.818647
phospholipid-translocating P-type ATPase, flippase subfamily protein	RTDGEsAGEGVVEGGDSVGSMADVSSR	TGGT1_247690;S1768	NaN	NaN	0.837209	0.776905	0.842469	0.000659094	0.818861
hypothetical protein	TLAHCGsSR	TGGT1_253140;S1196	NaN	NaN	0.949475	0.774487	0.7332	0.00648692	0.819054
RNA recognition motif-containing protein	RQsGGDEENAR	TGGT1_292200;S1484	NaN	NaN	0.723404	0.737293	0.997251	0.0116098	0.819316
putative RNA binding protein	KQPsNPTHASTK	TGGT1_203540;S500	NaN	NaN	0.693446	0.814621	0.95067	0.00811766	0.819579
hypothetical protein	TPNIGRAtPPR	TGGT1_316490T326	NaN	NaN	0.820051	0.955882	0.683723	0.00905788	0.819885
hypothetical protein	MPFASSGGGNLLLLSPSVNPGsPPAIPR	TGGT1_311230;S4018	NaN	NaN	0.673436	0.685849	1.10039	0.0280537	0.819892
hypothetical protein	TGTDsTGER	TGGT1_311230;S3710	1.17779	NaN	0.793664	0.689791	0.618699	0.00713265	0.819987
hypothetical protein	VSTLEAQEGDLsGAGAEK	TGGT1_242700;S1290	NaN	NaN	0.90929	0.885185	0.665717	0.00881025	0.820064
hypothetical protein	SVVALPVARtsPVPIANPAK	TGGT1_275680T469; ;S470	NaN	NaN	0.975	0.81477	0.670927	0.0112702	0.820232
hypothetical protein	LLTPSGYQGPDQIQsAPNPSTPIIK	TGGT1_280370;S527	NaN	NaN	0.780573	0.800815	0.87965	0.00135449	0.820346
calcium dependent protein kinase CDPK7	GFsGGGGSRPVSVLPSR	TGGT1_228750;S501	NaN	NaN	0.769231	0.683444	1.00868	0.0137794	0.820452
RNA recognition motif-containing protein	DDDRGQASHAVsPGR	TGGT1_320100;S342	NaN	NaN	0.868198	0.856941	0.736316	0.00263612	0.820485
hypothetical protein	VPLPAPSSDSNGsGEWR	TGGT1_269260;S179	NaN	NaN	0.773502	0.916667	0.771693	0.00340756	0.820621
hypothetical protein	GRsSDAK	TGGT1_265180;S354	NaN	NaN	0.889019	0.872267	0.700891	0.00532171	0.820726
hypothetical protein	GSAAVEsAPGVEAQESGDQANEPVDRDGEGEWQVVTNKK	TGGT1_295630;S118	NaN	1.14666	0.678384	0.671997	0.78607	0.0052134	0.820778
hypothetical protein	GGGEDEQVSREDsTAGADER	TGGT1_287480;S1645	NaN	NaN	0.709736	0.778797	0.974877	0.0092239	0.821137
putative nucleolar GTP-binding protein 1	GRsPsAGSADGDEADGHSR	TGGT1_261520;S599; ;S601	NaN	NaN	0.676347	0.793349	0.993945	0.0125131	0.821214
hypothetical protein	EVEIEEGETHsAGGVR	TGGT1_250820;S529	NaN	0.749357	0.842717	0.846018	0.847102	5.48519e-05	0.821299
regulator of chromosome condensation RCC1	RHsAASVEK	TGGT1_213900;S976	NaN	NaN	0.76206	0.790382	0.911726	0.00310844	0.821389
hypothetical protein	AQASAGSPsEKEDEATATK	TGGT1_279340;S172	NaN	0.575477	0.97254	0.949694	0.788006	0.0029353	0.821429
GRAM domain-containing protein	QAVAsEAETREEEAVEETLAETVGAR	TGGT1_311920;S1192	NaN	NaN	0.840949	0.863102	0.760338	0.00144169	0.821463
phosphatidylinositol-4-phosphate 5-Kinase	APsPATSSLPHTSTAYTFLEK	TGGT1_245730;S1847	NaN	NaN	0.774805	0.800983	0.888837	0.00175742	0.821542
cAMP-dependent protein kinase regulatory subunit	AEIVNEVSLAAPVVTKGsKGK	TGGT1_242070;S27	NaN	NaN	0.679823	0.757261	1.02825	0.0161232	0.821778
putative elongation factor 1-gamma	AAAKPAQsAGDDEEPAKKPAVK	TGGT1_300140;S221	NaN	1.4471	0.616549	0.572878	0.651232	0.0292776	0.821938
RNA recognition motif-containing protein	SVTRQsPGGPDTSDHTHDLGK	TGGT1_215400;S95	NaN	NaN	0.790955	0.855716	0.81993	0.000518502	0.8222
hypothetical protein	GAASSLSAGALEtGDEGETR	TGGT1_297330T1126	NaN	NaN	0.814544	0.985682	0.667189	0.0122891	0.822472
hypothetical protein	ASsPVVQR	TGGT1_311230;S2421	NaN	0.558304	0.905768	0.922743	0.90349	0.0026097	0.822576
hypothetical protein	MRHsPGRAEAHEGGGGEAPLPQDVK	TGGT1_313480;S293	NaN	NaN	0.952965	0.788229	0.726794	0.00666934	0.822663
hypothetical protein	GKEDsDAAR	TGGT1_279320;S988	0.96876	NaN	0.779221	0.664574	0.878237	0.00108273	0.822698
putative cell-cycle-associated protein kinase PRP4	NCETEKLEERNsPLR	TGGT1_313180;S281	NaN	NaN	0.845271	0.85482	0.768198	0.00110894	0.822763
AP2 domain transcription factor AP2X-1	FDVTWFVDDsPLAHTR	TGGT1_227900;S657	NaN	NaN	0.856436	0.742092	0.870028	0.00242209	0.822852
hypothetical protein	HLLQtPRPAWLK	TGGT1_214880T664	NaN	0.747796	1.08652	0.870968	0.587302	0.00435333	0.823147
hypothetical protein	SVTSEsNELSIR	TGGT1_272520;S46	NaN	0.713139	0.818811	0.891166	0.87037	0.000246388	0.823371
transcription factor s-ii (tfiis), central domain-containing protein	RAEtEDEAGEGPPAGHSLR	TGGT1_224660T488	NaN	NaN	0.608646	1.20517	0.656571	0.0499854	0.823462
protein phosphatase 2C domain-containing protein	GGSEtPEEAPER	TGGT1_267100T371	1.22956	0.638966	0.670193	0.733015	0.846239	0.00156035	0.823595
hypothetical protein	ILSSLPsGLFGVSAVSGVSSR	TGGT1_304720;S5081	NaN	NaN	0.91411	0.872538	0.684768	0.00725372	0.823805
hypothetical protein	RtGPDGVPSTR	TGGT1_247440T162	1.09338	NaN	0.78733	0.68764	0.72748	0.00294795	0.823956
putative U2 snRNP auxiliary factor	RRsPSIQRPER	TGGT1_236910;S224	1.00171	0.509597	0.795442	0.903129	0.911041	0.000638163	0.824185
hypothetical protein	ALGVPSAPQHtR	TGGT1_289880T718	NaN	NaN	0.701287	0.796187	0.975344	0.00936902	0.824273
hypothetical protein	GTsPSSAPR	TGGT1_258090;S30	NaN	0.678978	0.905049	0.970683	0.742411	0.00121762	0.82428
cytosolic tRNA-Ala synthetase	FAPEVTAVAsPTGENLVAVILDK	TGGT1_219540;S799	NaN	NaN	0.91629	0.935447	0.621145	0.0148904	0.824294
Tyrosine kinase-like (TKL) protein	ARsPRPFDYFK	TGGT1_301270;S2414	NaN	NaN	0.907143	0.869327	0.696466	0.00613206	0.824312
hypothetical protein	RNsSSMLDASK	TGGT1_219690;S126	0.661958	1.17514	0.923277	0.940633	0.420973	0.00312259	0.824396
dense granule protein GRA4	DSSSSESTVTPADEAAsESEEGDKTSR	TGGT1_310780;S258	0.649206	0.231124	1.07447	0.946488	1.22135	0.00936527	0.824528
alveolin domain containing intermediate filament IMC1	SRtVPIGEETER	TGGT1_231640T80	NaN	0.972327	0.743671	0.731306	0.850943	0.000683227	0.824562
transporter, major facilitator family protein	KAEsPSsGDRAR	TGGT1_257530;S15; ;S18	0.977292	NaN	0.793473	0.575375	0.952297	0.00297848	0.824609
hypothetical protein	APsEQQQPSESEPPAEVPMTPDPLTLR	TGGT1_279100;S142	NaN	0.459123	0.993872	0.95279	0.893106	0.00686519	0.824723
hypothetical protein	AGAGTGAPSGDASASGAVSRVsPR	TGGT1_306020;S888	NaN	NaN	0.663084	0.933245	0.878391	0.00984202	0.824907
hypothetical protein	GPSSPALSPSLsFER	TGGT1_316570A;S217	NaN	NaN	0.842589	0.897917	0.734572	0.00336285	0.825026
hypothetical protein	EFRDsPSSR	TGGT1_206540;S367	NaN	NaN	0.803803	0.930987	0.740577	0.00457307	0.825122
hypothetical protein	KADQDERGsEAGSPLK	TGGT1_230400;S2068	NaN	NaN	1.0189	0.732685	0.723785	0.0135187	0.825123
MIF4G domain-containing protein	GsAGGAGK	TGGT1_269180;S1193	1.00023	NaN	0.675014	0.644085	0.982571	0.00331414	0.825474
hypothetical protein	SSSDGSLSsPPKK	TGGT1_314480;S623	NaN	NaN	0.907317	0.841579	0.727718	0.00401423	0.825538
hypothetical protein	SHAsEDEDDFALLR	TGGT1_254000;S427	NaN	0.788406	0.915289	0.848	0.750962	0.000180648	0.825664
hypothetical protein	REEsQSGEGTSSR	TGGT1_250820;S1045	0.99974	NaN	0.53798	0.961062	0.804199	0.00426266	0.825745
hypothetical protein	GKGNsFDEGDTEGGAADAQSFLGDPR	TGGT1_236930;S2739	NaN	NaN	0.878385	0.722042	0.877102	0.00392651	0.825843
RNA recognition motif-containing protein	FSHDREsGDSNRR	TGGT1_209850;S484	NaN	NaN	0.812677	0.97572	0.689281	0.00993777	0.825893
facilitative glucose transporter GT1	GVsDDLTKGTEVV	TGGT1_214320;S558	0.776629	1.27811	0.725968	0.649565	0.699417	0.0019836	0.825937
zinc finger (CCCH type) motif-containing protein	SEVVEQLGDsPR	TGGT1_202900;S865	0.850579	NaN	0.792341	0.866434	0.794438	2.71301e-05	0.825948
hypothetical protein	RSGsPTTGQSPR	TGGT1_269990;S1184	NaN	NaN	0.859617	0.808824	0.809426	0.000415016	0.825956
hypothetical protein	GRsLSEEGSR	TGGT1_306400;S594	NaN	NaN	0.814086	1.0005	0.663636	0.0136266	0.826074
RNA recognition motif-containing protein	RDGDsGDEGGRDAR	TGGT1_294710;S1028	1.00268	NaN	0.710923	0.690816	0.899901	0.001627	0.82608
hypothetical protein	IsPPASPLPLTPSLLSPLPQK	TGGT1_211700;S928	NaN	NaN	1.04563	0.903501	0.52924	0.0330404	0.826124
cyclic nucleotide-binding domain-containing protein	RPAsPEEDVAR	TGGT1_295850;S392	NaN	NaN	0.844992	0.716026	0.917814	0.0050596	0.826277
hypothetical protein	SVEAAQAGREsRER	TGGT1_306400;S661	1.09698	NaN	0.720352	0.590428	0.897727	0.00488906	0.826372
hypothetical protein	APPPGAsGESSR	TGGT1_306400;S207	NaN	0.953758	0.68203	0.811587	0.858636	0.00069321	0.826503
hypothetical protein	GREsETLPK	TGGT1_225890;S1126	NaN	NaN	0.808831	0.837126	0.833714	0.000116378	0.826557
hypothetical protein	ANsGGSDSFDFLTGR	TGGT1_204310;S2181	NaN	1.00483	0.792271	0.671533	0.837635	0.00125073	0.826567
SNARE associated Golgi protein	QEQPAEVFsPAETPATTTK	TGGT1_279370;S403	NaN	0.933082	0.827381	0.799583	0.746644	0.00023367	0.826672
hypothetical protein	GSsESDKFGDSGDISK	TGGT1_224890;S128	NaN	NaN	1.05363	0.906203	0.520817	0.0349763	0.826883
Sin3-associated polypeptide SAP18	AVEsCEGIQTDSK	TGGT1_201400;S757	NaN	NaN	0.891532	0.746452	0.843137	0.00264851	0.82704
hypothetical protein	GRDPsVESFHSSR	TGGT1_292950;S587	0.747006	NaN	0.861295	0.842958	0.857469	7.65329e-05	0.827182
hypothetical protein	LPGVPPYANDPISHHGGsQEQR	TGGT1_201760;S213	NaN	NaN	0.809873	0.842932	0.829287	0.00013437	0.827364
adaptin c-terminal domain-containing protein	EDGEEsEGGEDFDWIR	TGGT1_272600;S712	NaN	NaN	0.88764	0.867347	0.727591	0.00367571	0.827526
AP2 domain transcription factor AP2XII-4	HLMsPGSASPTGGGLGIHYDK	TGGT1_247700;S3327	NaN	NaN	0.759146	0.965551	0.757995	0.00687898	0.827564
hypothetical protein	SEVTEDSHTDRDsQGLR	TGGT1_214880;S721	NaN	0.41561	1.05558	1.03024	0.809965	0.0113007	0.827849
hypothetical protein	LLQPGEKEGDVDEEAsREDR	TGGT1_235490;S190	NaN	NaN	0.808584	0.786174	0.890561	0.00146348	0.82844
hypothetical protein	LLQTDEEVEGEADKEsETKR	TGGT1_310570;S101	NaN	NaN	0.956522	0.81861	0.711066	0.00726763	0.828733
ubiquitin-specific protease USP4	LSAGERsPESPQFALADKEGEGEK	TGGT1_263420;S300	NaN	NaN	0.858171	0.814706	0.813448	0.000314559	0.828775
hypothetical protein	EGNTVKtPPLPSSAR	TGGT1_214880T296	NaN	NaN	0.92344	0.963206	0.600529	0.0186522	0.829058
hypothetical protein	GRQEGCTGEGSEGGISNRLsPAFLSK	TGGT1_214140;S1683	NaN	NaN	0.775751	0.875721	0.836034	0.00122624	0.829169
hypothetical protein	sPsPLPTIPR	TGGT1_241170;S638;;S640	0.526419	NaN	1.04987	0.990953	0.74966	0.00621456	0.829226
surface antigen repeat-containing protein	LLHLLQPAAsPK	TGGT1_213392;S990	NaN	0.781832	0.984554	0.878453	0.672859	0.00111639	0.829425
hypothetical protein	SEPPPPAPAGDGHVYFsDDDERDGK	TGGT1_202760;S51	0.816261	NaN	0.906198	0.83503	0.760289	0.000104988	0.829444
MIF4G domain-containing protein	REGDDsYSRPSSR	TGGT1_254940;S2134	0.756265	NaN	0.924638	0.845897	0.791711	0.000188672	0.829628
ubiquitin carboxyl-terminal hydrolase	REEsEEEALR	TGGT1_277895;S949	NaN	NaN	0.896552	0.726724	0.866379	0.00394973	0.829885
hypothetical protein	EIESNREsLQK	TGGT1_316350;S301	NaN	NaN	0.96875	0.909467	0.612621	0.0171539	0.830279
FHA domain-containing protein	EVGEASFsAGEAALR	TGGT1_201790;S83	NaN	NaN	0.902002	0.809194	0.779694	0.00196395	0.830297
RNA recognition motif-containing protein	KRPYVHAGSCAsAER	TGGT1_320100;S482	NaN	NaN	0.845731	0.877243	0.768206	0.00151863	0.830393
dense granule protein GRA7	GTDDHLtTSMDK	TGGT1_203310T70	NaN	0.599806	1.11245	0.883311	0.727229	0.00486095	0.830699
phosphatidylinositol 3- and 4-kinase	GASGsDETK	TGGT1_276170;S782	NaN	NaN	0.807388	0.718909	0.966133	0.00749262	0.83081
putative calmodulin	KMKDtDTEEELIEAFK	TGGT1_249240T80	NaN	NaN	0.865759	1.01228	0.614591	0.0189776	0.830877
DEAD/DEAH box helicase domain-containing protein	AASESSVEPVDFFAAYDDsPSR	TGGT1_253090;S86	NaN	NaN	0.833651	0.846082	0.812924	0.000135454	0.830886
putative adenine nucleotide translocator	GNADsQLMNTAK	TGGT1_249900;S19	NaN	NaN	0.782313	0.718644	0.991862	0.00972197	0.83094
Sjogren's syndrome/scleroderma autoantigen 1 (Autoantigen p27) protein	GVQYQMVAAIPLDQADsEKIESTLASVVGK	TGGT1_212260;S160	NaN	NaN	0.921896	0.837591	0.733365	0.00427812	0.830951
TFIIH basal transcription factor complex helicase XPB subunit	AQVPLASPHASAsPTGEDGDSAK	TGGT1_269660;S400	NaN	NaN	0.759155	0.840367	0.893333	0.00219768	0.830952
calcium-dependent protein kinase CDPK3	GGQsKGSAPSSGTGDSGK	TGGT1_305860;S31	NaN	NaN	0.631941	0.791091	1.06996	0.0229169	0.830997
hypothetical protein	DAALsADQEEAVSGLR	TGGT1_250820;S267	NaN	NaN	0.884718	0.753982	0.854404	0.00225245	0.831035
hypothetical protein	TVDEGVVEENPSLQTAQttEMETEGLR	TGGT1_259630T27; T28	NaN	NaN	0.716154	0.752445	1.02547	0.0135095	0.831356
hypothetical protein	LGRPGLPDsPSGENPPWQFGWFGAK	TGGT1_223790;S444	NaN	NaN	0.892023	0.872958	0.729109	0.00380401	0.831363
HECT-domain (ubiquitin-transferase) domain-containing protein	ERDGEsDADGDFPSLR	TGGT1_280660;S8532	NaN	NaN	0.763322	0.903162	0.827865	0.00235358	0.83145
hypothetical protein	LSVSsLQREEEK	TGGT1_309250;S1588	NaN	NaN	0.86021	0.798395	0.835912	0.000467242	0.831506
CTP synthase	LRLDVATPAsPASRPGAPLYK	TGGT1_299210;S333	NaN	1.04767	0.876138	0.677333	0.724904	0.00216171	0.831512
hypothetical protein	STsPCAVDCENVR	TGGT1_291940;S111	NaN	NaN	0.961259	0.772747	0.760657	0.00604469	0.831554
hypothetical protein	APsGPLGAPSSPR	TGGT1_229790;S840	1.00238	NaN	0.788854	0.685808	0.84921	0.0010868	0.831562
hypothetical protein	LPGCVLLHEGGsEEDFSAK	TGGT1_315080;S235	NaN	0.955205	0.805898	0.742541	0.822951	0.000338229	0.831649
hypothetical protein	DRGELsGDDLR	TGGT1_306020;S8635	NaN	NaN	0.825701	0.753758	0.915809	0.00316142	0.831756
hypothetical protein	AASPDtDTEKEGDEER	TGGT1_311230T1530	0.87922	NaN	0.912673	0.820654	0.715209	0.000308086	0.831939
histone lysine methyltransferase SET8	ARDEtPVKSER	TGGT1_211730T1317	NaN	NaN	0.704469	0.771861	1.01956	0.0129999	0.831963
helicase associated domain (ha2) protein	LDSSTVWTGAASSsLVDFER	TGGT1_318440;S678	NaN	NaN	0.759368	0.747268	0.989396	0.00884451	0.832011
hypothetical protein	TIPEEGGKPEAEItPK	TGGT1_221390T653	NaN	NaN	1.08762	0.889939	0.518953	0.0378557	0.832171
hypothetical protein	RGsSGGK	TGGT1_313370;S492	NaN	NaN	0.84991	0.970387	0.676319	0.0103553	0.832205
hypothetical protein	GRsGDsGLSAR	TGGT1_311230;S3724;;S3727	0.783196	NaN	0.936637	0.746551	0.863421	0.000289613	0.832451
hypothetical protein	KVNPFGDDGDQsPR	TGGT1_308060;S1829	NaN	NaN	0.895809	0.915174	0.686499	0.00764523	0.832494
RNA recognition motif-containing protein	SPsPSVSR	TGGT1_292200;S1248	NaN	0.974293	0.914894	0.848745	0.592633	0.00218481	0.832641
hypothetical protein	TAAEsDSAASAHELVGLGR	TGGT1_262935;S370	NaN	0.85757	0.833806	0.819479	0.820166	2.69572e-06	0.832755
hypothetical protein	SIQGTTKsPTQALLSSPDR	TGGT1_290620;S1978	NaN	NaN	0.929808	0.90839	0.661187	0.0105345	0.833128
putative high mobility group protein b1	RATKsPSTETK	TGGT1_247020;S110	0.921964	NaN	0.852442	0.70776	0.850838	0.000343654	0.833251
arginine decarboxylase	LsPSSFDAR	TGGT1_280700;S109	NaN	0.724514	0.881651	0.990576	0.736354	0.000953575	0.833274
Rab 5	AYsRPGQSGASGNASDLDSR	TGGT1_267810;S13	NaN	NaN	0.859649	0.876543	0.763645	0.00177534	0.833279
nucleoside transporter protein	APGNYPEMSVPGsAGSAK	TGGT1_233130;S70	NaN	NaN	0.864841	0.843679	0.791652	0.000680113	0.833391
hypothetical protein	RGDtPREDEGGVQSK	TGGT1_291180T2779	1.05542	NaN	0.782138	0.840405	0.655866	0.00213331	0.833458
splicing factor, CC1 family protein	EGsTHRENEEKPVNNER	TGGT1_312530;S25	NaN	1.08506	0.72943	0.904963	0.614549	0.00393682	0.833499
GYF domain-containing protein	GSSsAGPDGHALSSEAFSGER	TGGT1_298610;S617	NaN	NaN	0.914626	0.812847	0.773383	0.00253784	0.833619
AMP deaminase	LGLRsPK	TGGT1_234280;S968	NaN	NaN	0.775436	1.10421	0.621455	0.027946	0.8337
hypothetical protein	SQPDsARGEK	TGGT1_259040;S104	NaN	0.838706	0.825088	0.847304	0.82395	6.76148e-07	0.833762
hypothetical protein	TAsSEFFWR	TGGT1_210700;S3172	NaN	NaN	0.889019	0.850187	0.762477	0.00200833	0.833894
hypothetical protein	KTSTSsVGSQNR	TGGT1_266320;S53	NaN	NaN	0.883212	0.828395	0.790184	0.00104639	0.83393
hypothetical protein	AAsASAGKAPDTETGVSSAGR	TGGT1_270930;S2407	NaN	1.28547	0.673013	0.729401	0.648087	0.0117894	0.833992
transporter, major facilitator family protein	MHEPEtRLSDK	TGGT1_318150T46	NaN	NaN	0.956938	0.826495	0.71863	0.00675494	0.834021
hypothetical protein	SPAEHLDsDEERR	TGGT1_310170;S463	NaN	NaN	0.810566	0.835461	0.856854	0.000256908	0.834294
Sec7 domain-containing protein	GEVEQsEGDLGER	TGGT1_228660;S1827	0.862975	0.80615	NaN	NaN	NaN	0.0216653	0.834562
ubiquitin carboxyl-terminal hydrolase	ASAPASEAKGsEAETER	TGGT1_277895;S1700	NaN	NaN	0.94929	0.777586	0.777155	0.00468075	0.834677
hypothetical protein	AGGGRTsDEDGRDEK	TGGT1_242780;S3752	NaN	NaN	0.873806	1.06058	0.570096	0.0280819	0.834827
hypothetical protein	VAPVsPTFYR	TGGT1_235340;S685	NaN	0.750298	0.844025	0.878562	0.866849	9.30452e-05	0.834933
hypothetical protein	SRsEsPRGSSK	TGGT1_235740;S538;;S540	NaN	NaN	0.987342	0.732824	0.785425	0.00851666	0.835197
hypothetical protein	TLHSPAVENRGSEsER	TGGT1_224980;S1078	NaN	NaN	0.781711	0.788563	0.935397	0.00358242	0.835224
hypothetical protein	AsPAGsPVFAGQVPAQVK	TGGT1_201760;S244; ;S248	NaN	NaN	0.839182	0.934354	0.732163	0.00485348	0.835233
hypothetical protein	QAQPPSQsATTAASR	TGGT1_223790;S761	NaN	NaN	0.894455	0.803993	0.807622	0.00125048	0.835357
dense granule protein GRA6	RRYSsVQEPQAK	TGGT1_275440;S134	1.05593	0.5008	1.03191	0.752037	0.836528	0.00118914	0.835441
PUB domain-containing protein	ASLAPESsDVDECPAGEKPTLTAADIAR	TGGT1_209100;S365	NaN	NaN	0.732892	0.967129	0.806536	0.00678086	0.835519
hypothetical protein	SsQTAEK	TGGT1_289970;S152	NaN	NaN	0.721018	0.771282	1.0143	0.0115428	0.835533
AP2 domain transcription factor AP2X-7	RGQAATGsDAAEGEAK	TGGT1_214840;S298	NaN	NaN	0.92561	0.884346	0.696828	0.00702329	0.835595
hypothetical protein	HGAKGsDGDGR	TGGT1_244460;S124	NaN	NaN	0.822516	1.00778	0.676989	0.0128647	0.835762
hypothetical protein	DSAAGsATGVDEAER	TGGT1_311230;S4563	0.718513	NaN	0.813566	0.837998	0.973718	0.000543502	0.835949
rhoptry neck protein RON6	HDYTEGsQASPASRPDDNAR	TGGT1_297960A;S718	NaN	NaN	0.770522	0.727936	1.00984	0.0108327	0.836099
hypothetical protein	GGAsPPSAEVVSVGGMMSNR	TGGT1_235140;S259	NaN	NaN	0.838145	0.820028	0.850394	0.000111246	0.836189
zinc finger (CCCH type) motif-containing protein	EALALGNPSGGsGDFSGNVHYR	TGGT1_202900;S232	NaN	NaN	0.626925	0.824531	1.05725	0.0214089	0.836235
helicase associated domain (ha2) protein	RDsTTVSSAK	TGGT1_318440;S687	NaN	1.05954	0.726862	0.713115	0.845705	0.0018785	0.836306
hypothetical protein	KGDTLDNEAEGGSsPK	TGGT1_312260;S874	NaN	1.01404	0.832707	0.700237	0.798301	0.00103887	0.836322
RNA recognition motif-containing protein	SARPALPPGLNDSLAFGRVsPQR	TGGT1_304760;S500	NaN	0.898425	1.02421	0.837132	0.586094	0.0028195	0.836465
DHHC zinc finger domain-containing protein	LPRPSsGSYLPLASSTATAIR	TGGT1_293730;S773	NaN	NaN	0.883098	0.667494	0.959104	0.0107242	0.836565
RNA recognition motif-containing protein	AGQGTsPKTEGSEGGSAESR	TGGT1_215230;S511	NaN	NaN	0.839471	0.797487	0.873033	0.000681539	0.836664
MIF4G domain-containing protein	KFHGHQGGQQSESSsCDRR	TGGT1_254940;S2110	NaN	NaN	0.857246	0.745163	0.908077	0.00329087	0.836829
putative KDEL endoplasmic reticulum proteinretention receptor 2 (KDELR2)	IPPIEIDLQHVHVVGRPtADISSLSTSTNSPVTTNPPK	TGGT1_294040T303	NaN	NaN	0.812376	0.788028	0.910724	0.00200162	0.837043
transporter, major facilitator family protein	LMtLSRGSAEWDSEPHVEAFSAMPR	TGGT1_253700T1043	NaN	NaN	0.99147	0.715477	0.805242	0.0092897	0.837396
hypothetical protein	AFSTPHLESQVSAGTDPPEKPSASAQTAPPsPR	TGGT1_311230;S166	NaN	NaN	0.791227	0.784391	0.936665	0.00349783	0.837428
dense granule protein GRA14	YVLAAQLsR	TGGT1_239740;S123	NaN	0.470645	0.970192	0.949379	0.959879	0.00638356	0.837524
hypothetical protein	EPMLtDLTPSAQAFSTTSVAGFPDAEAEPPQR	TGGT1_220930T48	NaN	NaN	0.727691	0.937956	0.847166	0.00524246	0.837604
hypothetical protein	TAAADEEEEsSRILPTFTVQDIPSGDADVHK	TGGT1_258870A;S255	0.879603	NaN	0.780682	0.768971	0.922148	0.000196083	0.837851
hypothetical protein	KVsPSGPR	TGGT1_226620;S128	NaN	NaN	0.859	0.933944	0.72102	0.00549173	0.837988
hypothetical protein	KIVEKLEAADGLGsDDEAGVTR	TGGT1_291180;S907	1.06143	0.833485	0.644114	0.674478	0.977095	0.000509999	0.838121
alveolin domain containing intermediate filament IMC12	EAAVGsLASSPR	TGGT1_248700;S246	0.888776	0.787467	NaN	NaN	NaN	0.0384292	0.838122
hypothetical protein	GELEsEREGGGK	TGGT1_246730;S330	0.650127	NaN	0.85281	1.01946	0.830375	0.00156911	0.838193
RNA recognition motif-containing protein	RNsGTFLPLLGPER	TGGT1_292200;S1256	NaN	0.656957	0.939299	0.776485	0.980209	0.00152005	0.838237
hypothetical protein	TRDsSLGEK	TGGT1_304520;S72	NaN	NaN	0.904126	0.833898	0.776874	0.00192155	0.838299
hypothetical protein	ARGPsPLNR	TGGT1_247450;S1051	NaN	1.14177	0.80805	0.665259	0.738193	0.0041305	0.838318
hypothetical protein	VAsGDTVATTQVLSVVPSTDAEKETK	TGGT1_220600;S438	NaN	0.917002	0.729313	0.708297	0.999144	0.00131657	0.838439
calcium-dependent protein kinase CDPK3	GGQSKGsAPSsGTGDSGK	TGGT1_305860;S34; ;S38	NaN	NaN	0.733661	0.916027	0.865741	0.00418006	0.838476
rhoptry protein ROP5	tNDLASGTPHVAR	TGGT1_308090T34	0.603518	NaN	0.860392	1.01703	0.873003	0.00229256	0.838486
trypsin domain-containing protein	TRPSRDsQEsQGGSER	TGGT1_277850;S222; ;S225	NaN	NaN	0.794597	0.864209	0.856745	0.000691752	0.838517
hypothetical protein	GVsPESRPVLLEQEEWR	TGGT1_238880;S2677	NaN	NaN	0.866212	0.901319	0.748138	0.00303878	0.838556
hypothetical protein	SLAsNEsTGNERR	TGGT1_213610;S488;;S491	NaN	NaN	0.723802	0.73533	1.05654	0.0164921	0.838557
hypothetical protein	RAtLASMPSEMFR	TGGT1_315750T63	NaN	NaN	0.99543	0.81157	0.708884	0.00984203	0.838628
DnaJ domain-containing protein	IPPVSAPQPEsSDEEVESFRK	TGGT1_232050;S26	NaN	NaN	0.851379	0.777362	0.887414	0.00148841	0.838718
RNA polymerase-associated protein RTF1	SAsPSSSQPR	TGGT1_244210;S679	NaN	NaN	0.986493	0.853647	0.676331	0.0112778	0.838824
hypothetical protein	KPAsGSNGPLCASSEETASAGDGDSQQPGK	TGGT1_295630;S78	NaN	NaN	0.856566	0.837953	0.822139	0.000140629	0.838886
hypothetical protein	sPTGSSSPLLR	TGGT1_240060;S210	0.982438	0.434298	0.881938	0.886064	1.01021	0.00129837	0.83899
putative SWI2/SNF2 Brahma	IREGDTsPERSQER	TGGT1_320300;S1517	NaN	NaN	0.787178	0.811881	0.91814	0.00228468	0.839066
hypothetical protein	RIsDGQAPK	TGGT1_237290;S1626	NaN	NaN	0.93237	1.01411	0.57095	0.0253313	0.839143
guanylate-binding protein, N-terminal domain-containing protein	AsQSSVPQQMEFPTPLGVR	TGGT1_304990;S1234	NaN	NaN	0.738027	0.88807	0.892023	0.00362659	0.839373
hypothetical protein	KLDQLSEPEISHSDtQ	TGGT1_225160T400	NaN	0.528061	0.936267	0.867589	1.0259	0.0045187	0.839454
hypothetical protein	GKETLsAEELALR	TGGT1_315080;S751	NaN	NaN	0.869169	0.879211	0.770023	0.00171833	0.839468
nucleoporin autopeptidase	KPGRLtPDQVSPWSSTALQFMR	TGGT1_259640T940	NaN	NaN	0.762617	0.960775	0.795026	0.00530168	0.839473
hypothetical protein	SDsDRENVCGENPVSSATR	TGGT1_236930;S4873	NaN	NaN	0.887563	0.78363	0.847348	0.00129648	0.839514
protease inhibitor PI2	TLFSQQDDEsENDALEEEEQR	TGGT1_208450;S166	NaN	0.272866	0.991255	1.17027	0.923706	0.023355	0.839524
adaptin c-terminal domain-containing protein	QVNLSAGsPSSSPR	TGGT1_272600;S779	NaN	NaN	0.774831	0.867791	0.876257	0.00149398	0.839626
diacylglycerol kinase catalytic domain-containing protein	AVEAEGEVNVSDRPTEEsRER	TGGT1_259830;S164	NaN	NaN	0.74676	0.948044	0.824317	0.00483696	0.839707
HECT-domain (ubiquitin-transferase) domain-containing protein	LPQASERsPR	TGGT1_280660;S4001	NaN	NaN	0.894863	0.824111	0.80017	0.00114408	0.839715
vacuolar transporter chaperone VTC2	STVGsFSQSLGPEGAR	TGGT1_298630;S348	NaN	NaN	0.757246	0.781748	0.981095	0.00704576	0.84003
hypothetical protein	GLGPLTGGILGSsLSGSMQNLPTLTGEQTR	TGGT1_311230;S3749	NaN	NaN	0.802599	0.793851	0.924601	0.00251238	0.84035
CW-type Zinc Finger protein	sASGLGAGAAK	TGGT1_232370;S464	NaN	1.04205	0.656674	0.656961	1.00588	0.00421198	0.840391
AP2 domain transcription factor AP2XII-4	ENPAWAVsPSSFAAFVETAK	TGGT1_247700;S679	NaN	NaN	0.89939	0.986414	0.636128	0.0153301	0.840644
hypothetical protein	ALGVPSAPQHtRsLESVGNDNLPSR	TGGT1_289880T718;;S720	NaN	NaN	0.895221	0.726282	0.900901	0.00460952	0.840801
hypothetical protein	NERsPQSR	TGGT1_257430;S1136	NaN	NaN	0.807915	0.9767	0.737807	0.00703483	0.840807
hypothetical protein	GGDAsFEEAPSLSLK	TGGT1_218070;S13	NaN	NaN	0.911696	0.866133	0.744806	0.00348972	0.840878
hypothetical protein	EGHASSSADEGsQSSLKK	TGGT1_248740;S652	NaN	1.04205	0.682747	0.901537	0.737443	0.00194679	0.840944
RNA recognition motif-containing protein	FSHDREsGDsNRR	TGGT1_209850;S484; ;S487	NaN	NaN	0.822864	0.889893	0.810493	0.000858846	0.841083
MIF4G domain-containing protein	EVASAGEAAsVVELSQEVAEAAASTAAPSGPMTWAER	TGGT1_269180;S1133	NaN	NaN	0.779532	0.945284	0.798475	0.00385582	0.841097
Paf1/RNA polymerase II complex component LEO1	ARDALsPTDPTADAQPDDAAAK	TGGT1_216750;S86	NaN	NaN	1.07021	0.85494	0.598679	0.0252555	0.841276
hypothetical protein	SASHSEtTPR	TGGT1_221630T268	NaN	NaN	0.750118	0.878957	0.894855	0.00295387	0.84131
hypothetical protein	NEDVGNsEAEEETK	TGGT1_287480;S4098	NaN	0.325071	1.20553	1.03438	0.800493	0.0217181	0.841368
putative vesicle-associated membrane protein	GsVVLAEHSDMEGNFPTVTR	TGGT1_230430;S12	NaN	NaN	0.749893	0.909857	0.865449	0.00319274	0.841733
FAD binding domain-containing protein	HSAsMQQPR	TGGT1_220360;S432	1.01544	NaN	0.716651	0.86886	0.766028	0.0010404	0.841744
hypothetical protein	DLSPSSFHFVTDDEDSSPsEPPGTR	TGGT1_314080;S27	NaN	NaN	0.78628	0.82992	0.909091	0.00181835	0.841764
putative prohibitin	YDAESLLtQR	TGGT1_243950T141	NaN	NaN	0.922181	0.881215	0.721959	0.00522188	0.841785
hypothetical protein	VKVEDTEGDKsSR	TGGT1_225540;S65	NaN	NaN	1.09779	0.947533	0.480461	0.0454397	0.841928
rhoptry protein ROP8	VLsNANHLVSTALWR	TGGT1_363030;S223	NaN	NaN	0.881611	0.821884	0.822589	0.000552066	0.842028
Pumilio-family RNA binding repeat-containing protein	FLGGFQGDsLDGR	TGGT1_260600;S1099	NaN	NaN	0.857658	0.922904	0.745729	0.00375305	0.842097
hypothetical protein	GDSSLLsPTGQTGR	TGGT1_301410;S693	NaN	NaN	0.884793	0.810108	0.831497	0.000694578	0.842133
hypothetical protein	GDAVCPEAGKDECsEGGER	TGGT1_276220;S992	NaN	NaN	1.08771	0.84322	0.595798	0.0272692	0.842243
UBX domain-containing protein	sLSDLQR	TGGT1_220500;S150	0.875498	NaN	0.691099	0.698534	1.10406	0.00322396	0.842298
hypothetical protein	QPAGETAETDRAsSAELLATK	TGGT1_229640;S1221	NaN	NaN	0.817753	0.989852	0.719771	0.00866569	0.842459
RNA recognition motif-containing protein	EREYsPPR	TGGT1_208970;S8	NaN	NaN	0.905447	0.833086	0.789731	0.00160015	0.842755
alveolin domain containing intermediate filament IMC9	GTSSVAGLSQTTQQSASPLsPR	TGGT1_226220;S734	NaN	NaN	0.842712	0.863309	0.822374	0.000196535	0.842798
hypothetical protein	AGsTEEASR	TGGT1_233160;S288	1.03163	NaN	0.818277	0.88633	0.636684	0.0019592	0.843231
hypothetical protein	HStSKEISLLK	TGGT1_257430T1235	NaN	NaN	0.905888	0.941512	0.682368	0.00912292	0.843256
LNS2 (Lipin/Ned1/Smp2) protein	LGAAGEAYFVHEDEGAALGDLGDEESAsPILSPR	TGGT1_230690;S101	NaN	NaN	0.859733	0.84821	0.821931	0.000175912	0.843291
hypothetical protein	SYGELGRGsDDIIADIGGR	TGGT1_289880;S741	NaN	1.06417	0.79136	0.733999	0.784732	0.00148583	0.843566
splicing factor, CC1 family protein	GPsPGTLRDEAVYIR	TGGT1_312530;S176	0.840607	1.1	0.622363	0.684266	0.970713	0.000673028	0.843591
alveolin domain containing intermediate filament IMC1	ALQQLHGtQESVRsVtLEER	TGGT1_231640T62; ;S68; T70	NaN	NaN	0.789953	0.813476	0.927359	0.00252	0.843596
alveolin domain containing intermediate filament IMC14	SPPINMDVVVMSRsPR	TGGT1_260540;S307	NaN	NaN	0.766895	0.794273	0.96982	0.00563005	0.843663
hypothetical protein	ATPQIAsDSEQEK	TGGT1_244280;S53	0.513752	NaN	0.934211	0.935786	0.99095	0.00469691	0.843675
putative nucleolar protein	EAAsELSQAAVSEK	TGGT1_247470;S455	NaN	NaN	0.787637	0.897383	0.846966	0.00140913	0.843995
hypothetical protein	ALLQPSAEEDEASDISKETEETHSAQGtDDEIER	TGGT1_311030T3425	1.06431	0.0102067	1.20812	1.10089	0.836845	0.0177129	0.844074
hypothetical protein	LPLDAVDtRR	TGGT1_236870T142	NaN	0.544717	0.997083	1.05388	0.781399	0.00532989	0.84427
putative rhoptry protein	FTAENQHPLTNLAsAER	TGGT1_315940;S736	NaN	0.471477	0.963617	0.942064	1.00136	0.00661973	0.84463
hypothetical protein	TAVRVsGLTHAAR	TGGT1_299780;S462	NaN	NaN	0.88832	1.04021	0.605593	0.0219806	0.844708
CRAL/TRIO domain-containing protein	GsSGGFSAEK	TGGT1_203390;S19	NaN	NaN	0.776596	0.761905	0.995823	0.00792268	0.844775
hypothetical protein	NRsLESIGR	TGGT1_220950;S282	0.802682	0.306199	0.932301	1.00503	1.17889	0.00462874	0.84502
RNA recognition motif-containing protein	RETsLsSDRFR	TGGT1_209850;S1187; ;S1189	NaN	NaN	0.890775	0.938453	0.706468	0.0069306	0.845232
UDP-galactose transporter family protein	AGsPVAQEK	TGGT1_254580;S50	NaN	NaN	0.806572	0.954139	0.7751	0.00423566	0.84527
hypothetical protein	LAELEtLQTLAEVTYYR	TGGT1_246940T321	NaN	NaN	0.698914	0.726103	1.11134	0.0239255	0.845452
hypothetical protein	ASLCEsVDEGR	TGGT1_292950;S842	0.804557	NaN	0.699643	1.04458	0.833257	0.00134361	0.845509
histone H4	RIsGLIYEEIR	TGGT1_239260;S48	NaN	NaN	0.543067	0.900223	1.09345	0.0344803	0.84558
emp24/gp25L/p24 family protein	REDEGQLFDDDDDsASSLMEEWEK	TGGT1_310750;S402	NaN	NaN	0.825747	0.660019	1.0511	0.017492	0.845622
hypothetical protein	QAsVSSALSESPLGGAGGR	TGGT1_257430;S1408	NaN	NaN	0.94305	0.863528	0.730304	0.00534342	0.845627
alveolin domain containing intermediate filament IMC1	ALFNLTMQQPTQVQLsAEQAAK	TGGT1_231640;S551	NaN	NaN	0.697785	0.836483	1.00283	0.0106977	0.845699
hypothetical protein	GKPVLPGPAAALEGPPEKLPNsPLSTGLGGGYGAR	TGGT1_214140;S625	NaN	NaN	0.7897	0.879916	0.867493	0.00111242	0.845703
hypothetical protein	GGDNYSSAAPsEISDGLTGR	TGGT1_250820;S1023	NaN	NaN	0.722967	0.812389	1.00183	0.00931688	0.845729
eIF2 kinase IF2K-A (incomplete catalytic triad)	SVRPHsFPTAK	TGGT1_229630;S3980	NaN	NaN	0.770726	0.792483	0.974013	0.00575591	0.845741
ATG C terminal domain-containing protein	FAPAPPsPR	TGGT1_304630;S5818	0.658128	NaN	0.999497	0.781759	0.943625	0.0016617	0.845752
phosphatidate cytidylyltransferase	RLsSSGPLR	TGGT1_281980;S197	NaN	NaN	1.035	0.782609	0.720063	0.0127044	0.845891
hypothetical protein	TCtTDLSTSGSK	TGGT1_248420T6	NaN	0.479665	1.15558	1.04991	0.69852	0.0123835	0.845919
UBA/TS-N domain-containing protein	GRGtPSDEK	TGGT1_213870T144	1.11657	1.19179	0.53898	0.606014	0.776306	0.00306221	0.845933
hypothetical protein	AFYHANtPPHSSSRDALPADK	TGGT1_238390T268	0.956766	0.965028	0.851137	0.703947	0.753605	8.68727e-05	0.846097
facilitative glucose transporter GT1	MELNsSPsVPLTR	TGGT1_214320;S523; ;S526	0.864816	NaN	0.846963	0.754783	0.918401	0.000142895	0.846241
hypothetical protein	GADPFCFsPK	TGGT1_310170;S76	NaN	NaN	0.955735	0.865248	0.718156	0.0066239	0.84638
hypothetical protein	VGGQEADTGGLSLsQENEEK	TGGT1_254570;S1898	NaN	NaN	0.918478	0.884328	0.736577	0.00432051	0.846461
ThiF family protein	SAsAGTSADRYDR	TGGT1_274070;S33	NaN	NaN	0.924469	0.793863	0.82124	0.0021994	0.846524
AP2 domain transcription factor AP2XII-4	RLsGEVDKTAEVETAGSEDINVER	TGGT1_247700;S2200	NaN	NaN	0.86687	0.898593	0.774417	0.00193004	0.846627
hypothetical protein	RDsPPNPQAASSSAVGPGGGSAK	TGGT1_202760;S114	NaN	0.802832	0.863223	0.762087	0.959294	0.000283086	0.846859
PHD-finger domain-containing protein	RVENATGSGsPSLLGPVR	TGGT1_234900;S2323	NaN	NaN	0.797265	0.854019	0.889558	0.00100547	0.846947
hypothetical protein	VKEEGDsAVAAR	TGGT1_225000;S874	NaN	NaN	0.949886	0.881813	0.709143	0.00708082	0.846947
splicing factor, CC1 family protein	GGDDRGsPSRSPGPNK	TGGT1_312530;S67	1.06547	1.05492	0.622363	0.540655	0.951346	0.00158112	0.84695
DHHC zinc finger domain-containing protein	SDsRPPDEEIRR	TGGT1_249380;S108	NaN	NaN	0.977483	0.777821	0.787029	0.00584477	0.847444
hypothetical protein	EQsEEPIEFPACLAISALAIK	TGGT1_240980;S316	NaN	NaN	0.773298	1.04752	0.721827	0.0139279	0.847548
ATG C terminal domain-containing protein	APsRGGDAQGASTASR	TGGT1_304630;S4470	NaN	NaN	0.856568	0.890647	0.796184	0.00105961	0.8478
hypothetical protein	LATLAGVSEAsEEEVEREESEGGIAR	TGGT1_242780;S3457	NaN	NaN	0.91453	1.04363	0.585328	0.0249332	0.847829
transporter, major facilitator family protein	QDDDsPK	TGGT1_320020;S310	NaN	NaN	0.919118	0.852776	0.772062	0.00250469	0.847985
hypothetical protein	GHYSGDEGSRPPsVR	TGGT1_236560;S618	0.632234	NaN	0.865949	0.988854	0.90524	0.00156478	0.848069
AP2 domain transcription factor AP2X-7	ETNGAAsPEKEAEEHGAAEGK	TGGT1_214840;S1761	NaN	NaN	0.897218	0.829478	0.818563	0.000839777	0.84842
ThiF family protein	HPPVsPSLEQK	TGGT1_231940;S160	NaN	NaN	0.941399	0.766648	0.838243	0.00355192	0.848763
serine/threonine protein phosphatase	QAENVNsEEEAAMEECFGDMVAEAESLK	TGGT1_312200;S44	NaN	NaN	1.14227	0.8	0.60458	0.032594	0.84895
transporter, major facilitator family protein	QGLDFTPEANSSWETVEGVGERAEsAEVGR	TGGT1_318150;S361	NaN	NaN	0.938862	1.03905	0.569032	0.027193	0.848981
hypothetical protein	TEsNLERPR	TGGT1_265260;S144	NaN	NaN	0.983321	0.924431	0.63961	0.0152641	0.849121
HCNGP family protein	IPsPSGATGHSSETGWTSR	TGGT1_217440;S450	NaN	NaN	0.824287	1.02302	0.700771	0.0119941	0.849359
hypothetical protein	GDsKEVVDCVR	TGGT1_212960B;S254	NaN	NaN	0.941116	0.904055	0.703561	0.00745906	0.849577
rhomboid protease ROM4	HDTPAETAPsASPPR	TGGT1_268590;S72	1.10593	0.691785	0.736343	0.745275	0.969659	0.000449624	0.849798
rhoptry neck protein RON5	AVQEAYEEARPLQEAtIDKFK	TGGT1_311470T394	NaN	NaN	0.838071	1.02393	0.687638	0.0128443	0.84988
HCNGP family protein	SGLERIsPPASR	TGGT1_217440;S338	NaN	NaN	0.795768	1.004	0.75	0.00835181	0.849923
vacuolar (h+)-atpase g subunit protein	SVSALLHGDsGPSEGFDDAHGK	TGGT1_228200;S95	NaN	1.0786	0.715465	0.786528	0.8191	0.0017326	0.849924
protein phosphatase 2C domain-containing protein	RSsGTVGGIPVGASVEVNAEEEEK	TGGT1_267100;S170	NaN	NaN	0.788426	0.766985	0.995022	0.00723409	0.850144
ATP-binding cassette transporter ABC.B1	HPsFPLTSR	TGGT1_260310;S678	NaN	NaN	0.886973	0.979925	0.684076	0.0103879	0.850325
hypothetical protein	GMQQEGPVGGSSsPEQGGR	TGGT1_220240;S352	1.33788	0.380255	0.881454	0.88282	0.769533	0.00511092	0.85039
zinc finger (CCCH type) motif-containing protein	RDEsGEPGGR	TGGT1_309200;S853	0.842105	NaN	0.967761	0.82243	0.769668	0.000262799	0.850491
tRNA (uracil-5-)-methyltransferase	TAEPTAKDsPGQR	TGGT1_250750;S1019	NaN	NaN	0.954657	0.93626	0.660576	0.0122756	0.850498
putative myosin heavy chain	ETGAsNALsEEHATR	TGGT1_208370;S1006;;S1010	NaN	NaN	0.832359	0.822971	0.897372	0.000754968	0.850901
hypothetical protein	GGGTHAGsVEK	TGGT1_232800;S907	NaN	NaN	0.795327	0.870265	0.887454	0.00110269	0.851015
hypothetical protein	EVGsQDsAAAR	TGGT1_246982;S767; ;S770	0.7438	NaN	0.731839	0.96	0.969484	0.000987148	0.851281
transporter, major facilitator family protein	SSLLDVSGKEPADEDPRAPsPEVAV	TGGT1_320020;S583	0.903895	0.673981	0.987255	0.921549	0.769971	0.000114447	0.85133
hypothetical protein	AAPAIATIGsR	TGGT1_262935;S192	NaN	0.98471	0.753069	0.84604	0.822785	0.000403883	0.851651
hypothetical protein	RIsGDVVGR	TGGT1_210700;S8134	NaN	NaN	0.833528	0.883271	0.838262	0.000346201	0.851687
alveolin domain containing intermediate filament IMC1	IEtKENIIQRPK	TGGT1_231640T172	NaN	0.816762	0.889636	0.923993	0.776415	0.000134742	0.851702
putative glutamine synthetase, type I	WYFPVsPVDK	TGGT1_273490;S194	NaN	NaN	0.776173	0.796364	0.982667	0.00590196	0.851735
hypothetical protein	QSEEsEPAVSQNGGPEPMTQK	TGGT1_293440;S87	NaN	0.546484	0.850088	0.894049	1.11656	0.00538825	0.851795
RNA recognition motif-containing protein	GGGPWGGGsPR	TGGT1_270880;S844	NaN	NaN	0.855618	0.760021	0.939802	0.00369647	0.851814
dense granule protein GRA1	ASDGSYsEVGNVNVEEVIDTMK	TGGT1_270250;S92	NaN	NaN	1.07876	0.91065	0.56639	0.0299303	0.851933
rhoptry protein ROP8	RAAAAIPAAAsR	TGGT1_363030;S162	NaN	NaN	0.854925	0.778214	0.922749	0.00239282	0.851963
HECT-domain (ubiquitin-transferase) domain-containing protein	GAGsGGFGAR	TGGT1_295710;S5409	NaN	NaN	0.87156	0.785628	0.898958	0.00160152	0.852049
hypothetical protein	TQLGsLSSSVSTLAPGASVR	TGGT1_233220;S1199	NaN	NaN	0.866466	0.789912	0.899819	0.00145474	0.852066
hypothetical protein	SDLALAGKsDHLLDSR	TGGT1_269990;S1022	NaN	NaN	0.912802	0.946078	0.697746	0.00823703	0.852209
hypothetical protein	RsADVSPATK	TGGT1_229750;S229	NaN	NaN	0.872967	0.845528	0.838375	0.000152978	0.85229
Sin3-associated polypeptide SAP18	sANEEFLAALPPDHPFASR	TGGT1_201400;S330	NaN	NaN	0.756422	0.982971	0.817562	0.00624436	0.852318
nucleoside transporter protein	sVSPDEVVTMDSVAIDDASK	TGGT1_233130;S38	NaN	NaN	1.0229	0.884459	0.650569	0.0158537	0.852643
EF hand domain-containing protein	QARDsEEERGQK	TGGT1_227800;S532	1.1195	1.21225	0.516129	0.570154	0.845742	0.00370154	0.852755
RNA recognition motif-containing protein	TRPSASGVTtPK	TGGT1_291950T576	NaN	0.839467	0.938596	0.906169	0.727157	0.000358262	0.852847
histone lysine acetyltransferase HAT1	RPsASEEHCSK	TGGT1_293380;S359	NaN	NaN	0.738548	1.09613	0.724868	0.0196953	0.853182
putative heat shock protein 101	KIASsDDDANFEALKK	TGGT1_257990;S151	NaN	NaN	0.754927	0.838932	0.965797	0.00512061	0.853219
hypothetical protein	ETHPPSKLETSDsTEAEIMAQR	TGGT1_211630;S25	NaN	0.760961	0.938654	0.797048	0.91646	0.000294397	0.853281
microtubule associated protein SPM2	GACFsPAGVTR	TGGT1_286590;S32	NaN	NaN	0.852328	0.806306	0.901961	0.00104549	0.853532
MORN repeat-containing protein	EVsAEDWEGDQR	TGGT1_297150;S409	0.814592	NaN	0.896857	0.899819	0.802912	6.19674e-05	0.853545
tetratricopeptide repeat-containing protein	KTEENTASPsPACGR	TGGT1_243410;S498	NaN	NaN	0.873123	0.813543	0.874223	0.000550998	0.85363
slc30a2 protein	LAETHSACsR	TGGT1_251630;S410	NaN	NaN	0.891969	0.798081	0.870898	0.00110827	0.853649
hypothetical protein	sQLSRRDsGALLPSSLVR	TGGT1_250820;S983; ;S990	NaN	NaN	0.770331	0.860177	0.930625	0.00293919	0.853711
arginine decarboxylase	SLsGDSEAPQDFDLEAALR	TGGT1_280700;S52	NaN	0.816942	0.868722	0.843455	0.885917	1.2078e-05	0.853759
putative COPI protein	QKsDSQR	TGGT1_235020;S852	NaN	NaN	1.02113	0.943182	0.597023	0.0225198	0.853778
hypothetical protein	RGsAEEAGSPGGPR	TGGT1_239410;S74	0.846344	NaN	0.83178	0.818314	0.91908	4.0111e-05	0.853879
AP2 domain transcription factor AP2XI-3	VLAsEGAILFDGAAEK	TGGT1_310950;S154	NaN	NaN	0.765728	0.791319	1.00659	0.00789451	0.854546
hypothetical protein	VDtAsLLGTR	TGGT1_220240T175;;S177	NaN	NaN	0.822445	0.785005	0.956419	0.00368638	0.854623
acyltransferase domain-containing protein	ASPEFDAQKEQPLTHMAsHR	TGGT1_240860;S275	NaN	0.701669	0.704325	0.796801	1.21588	0.00603163	0.854669
tetratricopeptide repeat-containing protein	sLSPLIASLK	TGGT1_262700;S381	NaN	NaN	0.937756	0.87924	0.747772	0.00428978	0.854923
hypothetical protein	SDsVSDAISSIQQLGSVR	TGGT1_289880;S282	NaN	NaN	0.844669	0.811621	0.908487	0.00110396	0.854926
hypothetical protein	LLPQHAAsDsDNAGNPR	TGGT1_289880;S850;;S852	0.70126	NaN	0.830882	0.892419	0.995733	0.000806449	0.855073
hypothetical protein	KLsSYLQDIPLGFFQSR	TGGT1_258470;S111	NaN	NaN	0.977651	0.87801	0.709741	0.00825508	0.855134
DnaJ domain-containing protein	IPPVSAPQPESsDEEVESFR	TGGT1_232050;S27	NaN	NaN	0.867847	0.767374	0.930187	0.00306195	0.855136
hypothetical protein	EAsAEASNDAER	TGGT1_288350;S426	0.818336	0.891939	NaN	NaN	NaN	0.0273805	0.855137
hypothetical protein	LFsPEGSFVMAPEVTPEtPVR	TGGT1_315750;S42;T57	NaN	NaN	0.916078	0.880165	0.769476	0.0026504	0.85524
hypothetical protein	RFGCsVLQQPFR	TGGT1_258870A;S416	NaN	NaN	0.931818	0.784711	0.849292	0.00246839	0.855274
hypothetical protein	ELLYCTsPQGDSVSADFLR	TGGT1_286600;S108	NaN	NaN	0.848885	0.831835	0.88599	0.000348956	0.85557
splicing factor U2AF family SnRNP auxilary factor large subunit, RRM domain-containing protein	sRsPGGGGAAGGGK	TGGT1_319850;S165;;S167	1.00732	NaN	0.727273	0.700608	0.987753	0.00188783	0.855738
RNA recognition motif-containing protein	EVAWLVSSPASLMsASPR	TGGT1_292200;S822	NaN	NaN	0.863579	0.991427	0.712479	0.00875715	0.855828
hypothetical protein	EGHASSsADEGSQSSLK	TGGT1_248740;S647	NaN	NaN	0.729354	0.956793	0.882192	0.00605797	0.856113
RNA pseudouridine synthase superfamily protein	AKADEPGEGTATsPK	TGGT1_306660;S2911	NaN	NaN	0.903704	0.860452	0.804508	0.00112271	0.856221
RNA helicase (UPF2 interacting domain) protein	SGsGEVPESHR	TGGT1_291820;S238	0.933646	NaN	0.892915	0.899114	0.699875	0.000513731	0.856387
TBC domain-containing protein	EGRHsPGREDTSR	TGGT1_203910;S654	NaN	NaN	0.699886	0.953374	0.915903	0.00840151	0.856388
hypothetical protein	REEDDASELQEEARtPR	TGGT1_313590AT1500	NaN	NaN	0.708482	1.11944	0.741608	0.0228741	0.85651
pantoate-beta-alanine ligase	TESDIADETPLGRPGTGsPSSYKR	TGGT1_265870A;S492	NaN	NaN	1.02478	0.928191	0.616832	0.0200284	0.856601
hypothetical protein	GTTGAADEKGDEKPVVDGGsAGEER	TGGT1_210700;S2107	NaN	NaN	0.823014	0.912609	0.834566	0.00107695	0.85673
RNA recognition motif-containing protein	RDsGKQEGK	TGGT1_292200;S266	NaN	NaN	0.893617	0.701776	0.975811	0.00885484	0.857068
hypothetical protein	TAAEsDSAAsAHELVGLGR	TGGT1_262935;S370; ;S375	NaN	NaN	0.81728	0.960157	0.793976	0.00365289	0.857138
hypothetical protein	RssDDLLELLEQDDTEEGR	TGGT1_311480;S312;;S313	NaN	NaN	0.811285	0.812472	0.948019	0.00279069	0.857259
alveolin domain containing intermediate filament IMC12	HAEKEAAVGsLASsPR	TGGT1_248700;S246; ;S250	NaN	NaN	0.809816	0.783342	0.978652	0.00505294	0.85727
hypothetical protein	APsAGHQDGGSVSPLK	TGGT1_225910;S564	NaN	NaN	0.878715	0.893718	0.799905	0.00114938	0.857446
eukaryotic translation initiation factor 3 subunit 6 interacting protein	FDRsQDRR	TGGT1_273460;S615	NaN	NaN	1.0006	0.938442	0.633425	0.0170609	0.857489
hypothetical protein	SsPPTGLVAAFPLETR	TGGT1_262610;S160	NaN	NaN	0.942124	0.763436	0.867249	0.00362951	0.857603
NAD(+)/NADH kinase domain-containing protein	RASEAGRHsAER	TGGT1_244700;S1401	NaN	NaN	1.0321	1.01009	0.530643	0.0345202	0.857611
flavodoxin domain-containing protein	IADPTALQEEPMRTtPEVR	TGGT1_219630T267	NaN	NaN	0.825481	0.911919	0.835437	0.00101215	0.857612
hypothetical protein	GVRtPPAPPR	TGGT1_320750T234	NaN	NaN	0.935586	0.920198	0.717088	0.00667252	0.857624
putative eukaryotic initiation factor 2B epsilon subunit	QAVSSsPNHGSGKK	TGGT1_274190;S35	NaN	NaN	0.695195	0.867525	1.0109	0.0111289	0.857873
domain K- type RNA binding proteins family protein	GDRsLsRDGGYGR	TGGT1_235930;S501;;S503	0.752424	NaN	0.962389	0.925275	0.791946	0.000451227	0.858009
putative cell-cycle-associated protein kinase CDK	RGENRPAFsPERPAFDESR	TGGT1_249260;S1194	NaN	NaN	1.01487	0.927778	0.631399	0.0178107	0.858016
hypothetical protein	LPsKESNALTR	TGGT1_225690;S8	NaN	0.86479	0.829504	0.78185	0.957427	0.000177259	0.858393
3'5'-cyclic nucleotide phosphodiesterase domain-containing protein	RPLDAEPFVPKHsAGEFPGSCK	TGGT1_241880;S73	NaN	NaN	0.821855	0.753846	1	0.00722787	0.858567
peptidase, M28 family protein	SVtASRREEEAPR	TGGT1_225850T957	NaN	NaN	0.802742	0.810329	0.96298	0.00367433	0.858684
HECT-domain (ubiquitin-transferase) domain-containing protein	GLSSAFYGLGsR	TGGT1_295710;S2537	NaN	NaN	0.872215	0.809179	0.894792	0.000888773	0.858729
TB2/DP1, HVA22 family protein	SAsNPVDRETVK	TGGT1_211710;S157	NaN	1.02117	0.752658	0.756374	0.90487	0.00092447	0.858768
microtubule associated protein SPM2	TPSHRWsAEVGK	TGGT1_286590;S137	NaN	NaN	0.938359	0.897297	0.741612	0.00483005	0.859089
hypothetical protein	IPTSSTVWsGPVPSETVTK	TGGT1_230850;S197	NaN	NaN	0.819191	0.864545	0.893617	0.000634779	0.859118
UBX domain-containing protein	GAATLLDSDLHPNSAVLLVPtDDEDE	TGGT1_288340T487	NaN	NaN	0.796069	0.770174	1.01126	0.00781734	0.859168
hypothetical protein	DRsPLAVSSSAGAAAPQR	TGGT1_261430;S282	NaN	NaN	0.895756	0.866395	0.815672	0.000740192	0.859274
hypothetical protein	EKFSVVHDEGAEsGDEGWGSQYANVPEALK	TGGT1_311890;S99	NaN	NaN	0.894807	0.808707	0.874446	0.000912803	0.85932
IMC sub-compartment protein ISP2	SASPAVGAsA	TGGT1_237820;S159	NaN	NaN	0.781386	0.839709	0.956883	0.0035866	0.859326
glycosyltransferase family 28 C-terminal domain-containing protein	ALGSFTNASSPsPR	TGGT1_268340;S132	NaN	NaN	1.08325	0.889393	0.605638	0.0250656	0.859427
hypothetical protein	KDAPLENFSLsPMSTHMGAR	TGGT1_243460;S1389	NaN	NaN	0.938215	0.950026	0.69035	0.00956221	0.85953
hypothetical protein	ANsFSLSVSDVR	TGGT1_229640;S646	NaN	NaN	0.880076	0.967712	0.731209	0.00638637	0.859666
putative myosin heavy chain	VAsEAsDtPGRGTSANVDHLQGR	TGGT1_208370;S1019; ;S1022; T1024	NaN	NaN	0.969786	0.901756	0.707551	0.00824884	0.859698
regulator of chromosome condensation (RCC1) repeat-containing protein	ATsEDEGAQTR	TGGT1_313860;S664	0.871985	NaN	0.778399	0.923522	0.865912	9.41554e-05	0.859954
RNA recognition motif-containing protein	SAAsPFFSDRGEGR	TGGT1_291330;S86	0.796418	1.11596	0.724398	0.804129	0.859289	0.000218347	0.860039
hypothetical protein	SLsAPPEASK	TGGT1_311230;S2740	NaN	NaN	0.862713	0.832479	0.884963	0.000312577	0.860052
rhoptry neck protein RON9	ENAsQPSESPAEESTPEQAEEK	TGGT1_308810B;S447	0.502297	NaN	1.0323	0.984476	0.921517	0.00578528	0.860148
hypothetical protein	KPGGVAsEDAIVTVVSQTPPETLAK	TGGT1_309910;S301	NaN	NaN	0.973425	0.658606	0.94855	0.0135206	0.860194
Na+/H+ exchanger NHE3	EAKGGDtDDEDAPR	TGGT1_305180T1400	0.801698	1.33912	0.884041	0.702227	0.574449	0.00273284	0.860307
hypothetical protein	SVLLPPAPCsPPNEVSFFSDDVPNENR	TGGT1_244670;S236	NaN	NaN	0.841507	0.911933	0.827815	0.000915996	0.860418
hypothetical protein	VPGLQVWDRPPEYTDGGAPGsG	TGGT1_237015;S263	NaN	0.662817	1.1509	0.845976	0.782174	0.00369672	0.860467
HECT-domain (ubiquitin-transferase) domain-containing protein	sMPGLLSVPTR	TGGT1_209000;S4315	NaN	NaN	0.97456	0.785425	0.821462	0.00450945	0.860482
putative PP2C	SDAPVDSEtPPTGEAK	TGGT1_281580T45	0.948357	NaN	0.783	0.937821	0.772755	0.000373562	0.860483
hypothetical protein	DHGSLGPWRsPPR	TGGT1_270930;S2688	NaN	NaN	0.928605	0.899345	0.753897	0.00391735	0.860616
putative eukaryotic initiation factor-4E	ASDTPPTSPtVAWSSPK	TGGT1_315150T80	NaN	NaN	0.873941	0.814593	0.893736	0.000762284	0.860757
zinc finger (CCCH type) motif-containing protein	RPLSSMDsSEEMGSESPAGAGGGAAK	TGGT1_202900;S914	0.638552	NaN	0.82274	0.795286	1.18648	0.00505194	0.860764
putative DNA topoisomerase 2	KAssDEEVVSLDR	TGGT1_312230;S1596;;S1597	NaN	NaN	0.927882	0.86386	0.790609	0.0021158	0.860784
hypothetical protein	SAPDPSEtPR	TGGT1_229640T156	0.834991	0.931609	0.767705	1.03044	0.739788	8.88067e-05	0.860907
Rab5B protein	SDSMENsENAEPPPEEGTAGVDVEAER	TGGT1_207460B;S133	NaN	NaN	0.902015	0.886271	0.794836	0.00150245	0.861041
peptidase, M28 family protein	RSDAsGTEK	TGGT1_225850;S972	NaN	NaN	0.927023	0.772395	0.883912	0.00285013	0.86111
hypothetical protein	AFDGDGSVPPPMsPAK	TGGT1_283510;S155	NaN	NaN	0.809324	0.793028	0.981103	0.00484495	0.861152
TBC domain-containing protein	GREVsHSR	TGGT1_203910;S1032	NaN	NaN	0.678815	0.888344	1.01634	0.0128003	0.861166
MORN repeat-containing protein	QNEGDSSCAsLEK	TGGT1_297150;S351	NaN	NaN	0.992032	0.853339	0.738708	0.007152	0.86136
hypothetical protein	SYSQKsPEASSR	TGGT1_306020;S8760	NaN	NaN	0.997196	0.706012	0.881197	0.00951442	0.861468
alveolin domain containing intermediate filament IMC1	ALQQLHGTQEsVRsVTLEER	TGGT1_231640;S65;;S68	0.68168	NaN	0.762263	0.879211	1.12358	0.0029413	0.861683
hypothetical protein	SRDEAsNSGEPPSQSKPSQLSK	TGGT1_310930;S306	NaN	0.834588	0.905854	0.882812	0.823715	2.55915e-05	0.861742
putative SWI2/SNF2 Brahma	EGETSsPSAEEDAEDLPK	TGGT1_278440;S2001	NaN	NaN	0.893258	0.972998	0.719548	0.00745139	0.861935
NLI interacting factor family phosphatase	CCGEENLPAEGDRLsEK	TGGT1_202550;S761	NaN	NaN	0.879249	0.903438	0.803589	0.00121469	0.862092
signal peptidase	RLsIKEEK	TGGT1_214090;S1441	NaN	NaN	0.942568	0.724593	0.919149	0.0063608	0.862103
hypothetical protein	KLsIDTLSLIGSASK	TGGT1_212770;S602	NaN	NaN	0.904875	1.00504	0.677201	0.0124156	0.862372
putative vacuolar proton translocating ATPase subunit	ASAGAPAsPLEEERESLVVASSSR	TGGT1_290720;S858	NaN	NaN	0.83513	0.862443	0.889854	0.000335323	0.862476
DnaJ domain-containing protein	SPGSSEEGAsGRSSPHSAK	TGGT1_203380;S175	NaN	NaN	0.714286	0.797637	1.07569	0.0156694	0.862538
putative eukaryotic initiation factor-4E	NVPsPVLAAK	TGGT1_315150;S102	NaN	1.35813	0.687593	0.862069	0.542459	0.0166755	0.862562
putative cell-cycle-associated protein kinase CDK	AARsPEADASSR	TGGT1_304970;S440	0.944054	0.919967	0.810648	0.85338	0.785364	9.36674e-06	0.862683
hypothetical protein	DEANSFSASQLDSFsLLSAPLSNFK	TGGT1_253140;S380	NaN	NaN	1.13157	0.811845	0.644711	0.026331	0.862709
hypothetical protein	ARLssPDRSSSR	TGGT1_290910;S903;;S904	NaN	NaN	0.991351	0.837476	0.759388	0.00618075	0.862738
NOL1/NOP2/sun family protein	SSEGSSPVsPK	TGGT1_288530;S710	NaN	0.719947	1.0285	0.824832	0.878858	0.000892777	0.863034
hypothetical protein	SHFPVEEEEsDSEPSR	TGGT1_216060;S720	NaN	0.637943	1.00192	0.985528	0.826947	0.00202015	0.863085
AP2 domain transcription factor AP2X-7	EGAKEEPELEKPEENAAPsEEQ	TGGT1_214840;S1866	NaN	NaN	0.854628	0.951587	0.783116	0.00318382	0.86311
Sin3-associated polypeptide SAP18	LPRPsPsIQREPR	TGGT1_201400;S260;;S262	NaN	NaN	0.836346	1.09934	0.653879	0.0217075	0.863188
hypothetical protein	TLDDsGEEIKR	TGGT1_208490;S947	NaN	NaN	1.00489	0.819923	0.765167	0.00698327	0.863327
hypothetical protein	LHCETWDsLVKR	TGGT1_299780;S352	NaN	0.673883	0.994881	0.820246	0.964524	0.00133994	0.863383
PLU-1 family protein	GAAEEGQTGEQEGSGsDSIFSPSR	TGGT1_253750;S2667	NaN	NaN	0.961777	0.954813	0.673608	0.0118707	0.863399
zinc finger (CCCH type) motif-containing protein	GKsVsPSDSGGHR	TGGT1_202900;S29; ;S31	NaN	NaN	0.752862	0.925797	0.911668	0.00409742	0.863442
hypothetical protein	HHsGTMTPLSPR	TGGT1_205680;S743	NaN	NaN	0.876588	0.906863	0.807267	0.00116318	0.863573
EF hand domain-containing protein	EAILGVSGGSSQRLsR	TGGT1_216620;S2619	NaN	NaN	0.84601	0.979458	0.765267	0.00518925	0.863578
hypothetical protein	LNPVIQTSLsKELLYETTSPR	TGGT1_250820;S1107	NaN	NaN	0.946381	0.810619	0.834779	0.00233426	0.863926
hypothetical protein	HSWGANELPAGQQGsPLAER	TGGT1_295360;S24	0.554166	1.01476	0.833123	0.899548	1.01838	0.000529498	0.863994
hypothetical protein	sAGGLGSFRPGEASGPK	TGGT1_306020;S4587	NaN	0.781037	0.818692	0.895668	0.960711	0.000218682	0.864027
CW-type Zinc Finger protein	KAsPGGDGGSRPAK	TGGT1_232370;S265	NaN	0.920366	0.993213	0.7009	0.842157	0.000820849	0.864159
ATP-binding cassette transporter ABC.B1	KFsDNANTGVDIAFTDVQFR	TGGT1_260310;S1067	NaN	NaN	0.873084	0.887488	0.832053	0.000369051	0.864208
putative phosphatidylserine synthase	ASsPSMAECSPR	TGGT1_273540;S31	0.788439	NaN	0.911855	0.889803	0.866787	6.61558e-05	0.864221
sodium/hydrogen exchanger 3 protein	WLGSGEEsDVSEEFDFAESR	TGGT1_263480;S808	NaN	NaN	1.06409	0.683641	0.845077	0.0158844	0.864269
putative translation initiation factor IF-2	GGLSsDEEFEAK	TGGT1_214270;S18	NaN	NaN	0.824383	0.798645	0.969893	0.00378324	0.864307
hypothetical protein	LDGGDGPTHGGEKPsPDALPWWEK	TGGT1_275990;S458	NaN	0.888249	0.961862	0.892655	0.714678	0.000492228	0.864361
putative DNA mismatch repair protein MSH6-1	SSsGNEEDPGSEDVRK	TGGT1_290640;S160	NaN	NaN	0.950318	0.902577	0.740304	0.00536331	0.8644
hypothetical protein	REPSsDADATAR	TGGT1_288350;S635	0.902938	NaN	0.876041	0.852459	0.826188	1.50128e-05	0.864407
guanylyl cyclase	GPQVsLSR	TGGT1_254370;S1780	NaN	0.648133	0.82372	0.890854	1.0951	0.00258249	0.864452
hypothetical protein	VSRsPGQGK	TGGT1_247450;S291	NaN	0.949774	0.871827	0.691194	0.945072	0.00074105	0.864467
hypothetical protein	RVssEGSHQGVR	TGGT1_239400;S1081;;S1082	1.04404	NaN	0.772479	0.813035	0.82833	0.000761355	0.864471
hypothetical protein	RPsQTSK	TGGT1_238380;S644	NaN	NaN	0.8542	0.940087	0.799314	0.00223768	0.864534
hypothetical protein	RGsLAGHR	TGGT1_306400;S1154	NaN	NaN	0.723977	1.11587	0.754091	0.0205545	0.864646
centrin 2	GAsPTAR	TGGT1_250340;S10	0.73909	1.11711	0.705716	0.816404	0.9463	0.000329942	0.864925
putative adenylate cyclase	KETATPYGsPIGR	TGGT1_270865;S1979	NaN	NaN	0.931912	0.837651	0.825654	0.00150509	0.865072
ULK kinase	LSVDsEHTGGHR	TGGT1_235750;S318	NaN	NaN	0.891811	0.756639	0.948058	0.00427953	0.865503
putative casein kinase I	TSLVDQGDRGsR	TGGT1_289320;S398	NaN	NaN	1.04449	0.824953	0.727443	0.0115285	0.865629
DNA-directed RNA polymerase I RPA1	LNLARLsDAAAyALR	TGGT1_244880;S1321; Y1326	NaN	NaN	0.96665	0.914555	0.715838	0.00770214	0.865681
PLU-1 family protein	SFsPSSHDCQR	TGGT1_253750;S5626	0.729193	NaN	0.915806	0.859037	0.958805	0.000416872	0.86571
hypothetical protein	GFFsWLR	TGGT1_313440;S171	NaN	NaN	0.91	0.873786	0.813352	0.00105868	0.865713
hypothetical protein	NTAATAAPAAEAGsDGGLDAAATLLK	TGGT1_254570;S1253	NaN	NaN	0.977717	0.807036	0.8125	0.00415868	0.865751
hypothetical protein	TSMQESSEQPGSPSTKPGsPSGHANK	TGGT1_240060;S239	NaN	0.636819	0.603951	1.03404	1.18828	0.00945286	0.865773
hypothetical protein	HFADTSPEAQSVPADDAsPLSGAK	TGGT1_220600;S419	NaN	0.81668	0.922975	0.832745	0.890839	5.18933e-05	0.86581
hypothetical protein	RTAEEIEEDALsAQFPSFAEDTPR	TGGT1_241000;S221	NaN	NaN	0.910302	0.879215	0.808124	0.00121749	0.86588
hypothetical protein	GRsAsLSPSAK	TGGT1_247450;S1182; ;S1184	NaN	NaN	0.853251	0.766586	0.977926	0.00498	0.865921
putative adenylosuccinate lyase	LRPTADsEEDEVSNDAAR	TGGT1_277760;S56	0.941213	1.00153	0.824447	0.761144	0.801757	4.37531e-05	0.866017
hypothetical protein	RTsVEGPR	TGGT1_253140;S532	NaN	NaN	0.994497	0.905695	0.697937	0.0101393	0.866043
hypothetical protein	REDsETFR	TGGT1_316350;S19	NaN	NaN	0.880208	0.671495	1.04652	0.0153319	0.866074
putative nucleolar protein	FQVGLGHSYsR	TGGT1_247470;S169	NaN	NaN	0.841476	0.910723	0.846086	0.000665474	0.866095
hypothetical protein	VVIREPsMPSATVPGLQFQR	TGGT1_241170;S654	0.691794	NaN	0.837534	0.976051	0.95971	0.000949316	0.866272
hypothetical protein	RStLPSQQEPSR	TGGT1_221390T475	NaN	NaN	0.834688	0.74256	1.02166	0.00886336	0.866303
hypothetical protein	QAsTEALLSPGLFSGLPDELR	TGGT1_230000;S2141	NaN	NaN	0.875929	0.76903	0.954029	0.00380889	0.866329
hypothetical protein	GVEGPQPEGDsGERR	TGGT1_306400;S501	1.0037	0.410444	0.89073	0.915869	1.11091	0.00197234	0.866331
hypothetical protein	GAEDsGSSVENRR	TGGT1_217680;S695	0.85703	NaN	0.699899	0.771414	1.13766	0.00286482	0.866501
hypothetical protein	EAGRsLEAGR	TGGT1_320160B;S273	NaN	NaN	0.901218	0.984284	0.71417	0.00839007	0.866557
rhoptry protein ROP17	AFDEYtFR	TGGT1_258580T146	NaN	NaN	0.761593	0.961421	0.876768	0.00443575	0.866594
hypothetical protein	AAsPFTSTNR	TGGT1_240510;S1162	NaN	NaN	0.904739	0.979935	0.715634	0.00812791	0.866769
Ser/Thr phosphatase family protein	KTGsPPASELR	TGGT1_269460;S791	NaN	NaN	0.945789	0.80666	0.848512	0.00225189	0.866987
putative translation initiation factor IF-2	GVVLGDDQsETSHK	TGGT1_214270;S418	NaN	1.06718	0.683599	0.756534	0.960753	0.00228546	0.867017
RNA recognition motif-containing protein	RRsPSTDSHFGCER	TGGT1_209850;S1374	NaN	0.950666	0.886248	0.784867	0.84758	0.000141046	0.86734
putative myosin heavy chain	ETGASNALsEEHATR	TGGT1_208370;S1010	1.10749	0.661476	0.851852	0.86711	0.848978	0.000256783	0.86738
hypothetical protein	SQtLESTGVPQLSLAR	TGGT1_315750T26	NaN	NaN	0.860823	0.87562	0.866059	2.49348e-05	0.867501
hypothetical protein	KEHsDEGALLRPK	TGGT1_269710;S354	NaN	NaN	1.02248	0.849468	0.730926	0.00938575	0.867625
hypothetical protein	QAAsDQGVGEEK	TGGT1_269970;S76	NaN	NaN	0.906091	0.927879	0.769294	0.0032552	0.867755
Ser/Thr phosphatase family protein	AAAVLsGDSVPAGLGR	TGGT1_269460;S1723	NaN	NaN	0.924492	0.855689	0.823264	0.00118059	0.867815
hypothetical protein	ATPGLGPAPDGAAsGAEAGPAR	TGGT1_215950;S634	NaN	NaN	1	0.774115	0.829387	0.00608049	0.867834
acyl-CoA:cholesterol acyltransferase alpha ACAT1-alpha	VSLEATMCsPSPEK	TGGT1_263710;S139	NaN	NaN	0.823187	0.986936	0.793763	0.00475882	0.867962
glyceraldehyde-3-phosphate dehydrogenase GAPDH2	LNKsTTYEEIKK	TGGT1_269190;S898	NaN	NaN	1.20198	0.866059	0.536461	0.045645	0.868167
DEAD/DEAH box helicase domain-containing protein	GVHtPQLEGGALPEGK	TGGT1_205540T78	NaN	NaN	0.835616	0.911162	0.857763	0.000666317	0.86818
hypothetical protein	AEsSPLFLEMVAGFPGPLGAADAR	TGGT1_294730;S1263	NaN	NaN	0.742801	1.10785	0.754505	0.0184995	0.868385
DnaJ domain-containing protein	IPPVSAPQPEssDEEVESFRK	TGGT1_232050;S26;;S27	NaN	NaN	0.75175	0.877237	0.976893	0.00557605	0.868627
calcium-dependent protein kinase CDPK2A	GAGLFSSTsTQK	TGGT1_206590;S162	NaN	NaN	0.783626	0.836917	0.985615	0.00480539	0.868719
hypothetical protein	tSPGTSLGVGSSLPSR	TGGT1_230850T101	NaN	NaN	0.796979	0.864545	0.945224	0.00242311	0.868916
NAD(+)/NADH kinase domain-containing protein	GGsEASLR	TGGT1_244700;S1762	NaN	NaN	0.959344	1.09084	0.556801	0.0325171	0.868995
CAM Kinase family, incomplete catalytic triad	QEtPDWER	TGGT1_253940T527	NaN	NaN	0.751949	0.898919	0.956614	0.00487782	0.869161
hypothetical protein	EIEGTLAsEETEEKGEIR	TGGT1_294730;S769	0.828399	NaN	0.905759	0.934907	0.807995	9.35946e-05	0.869265
vacuolar (h+)-atpase g subunit protein	SVSALLHGDsGPsEGFDDAHGK	TGGT1_228200;S95; ;S98	NaN	NaN	0.75399	0.927461	0.926538	0.00437202	0.86933
hypothetical protein	SAGREsAERR	TGGT1_246090;S540	NaN	NaN	0.88048	0.683993	1.04374	0.0140088	0.869404
hypothetical protein	EAsAKEHQLQK	TGGT1_258090;S409	NaN	NaN	0.832793	0.865781	0.909821	0.000657889	0.869465
hypothetical protein	QPsVASTTASEAGLEDVDAIR	TGGT1_202200;S318	0.815041	NaN	0.805375	1.04257	0.814915	0.000635822	0.869475
tetratricopeptide repeat-containing protein	TERHDDEEEAFRHsPK	TGGT1_262100;S438	NaN	NaN	1.01701	0.948233	0.643206	0.017009	0.869483
alveolin domain containing intermediate filament IMC6	QGSRGSSFNsEGEVH	TGGT1_220270;S439	0.852173	0.886896	NaN	NaN	NaN	0.0127096	0.869534
nuclear transport factor 2 (ntf2) domain-containing protein	EAVVPSsPsPR	TGGT1_243960;S341;;S343	0.499144	NaN	0.829268	0.892499	1.25727	0.0112694	0.869545
hypothetical protein	sLSEAPQMPDLSGIVSR	TGGT1_276220;S492	NaN	NaN	0.896181	0.986229	0.726496	0.00757949	0.869635
CAM Kinase family, incomplete catalytic triad	LSEAAsATEGTVALQLQEEALPVATQPIQQSSLSP	TGGT1_253940;S538	NaN	NaN	0.706098	1.08698	0.815873	0.0165222	0.86965
PLU-1 family protein	GAAHVTGGAMsPASQESR	TGGT1_253750;S6916	NaN	NaN	0.808368	0.898821	0.901766	0.00124012	0.869652
hypothetical protein	EPTQTEQVsDAPSEDPER	TGGT1_226580;S24	0.823726	1.07179	0.738901	0.836763	0.877445	9.56215e-05	0.869725
hypothetical protein	AAVDRDSsLTSALLR	TGGT1_230340;S353	NaN	NaN	0.862341	0.913526	0.833333	0.000725736	0.869733
bromodomain-containing protein	DASSAETGEsPEGPGEVKSEDGARR	TGGT1_263580;S642	1.08863	0.791039	0.928718	0.858038	0.682289	0.000217074	0.869742
hypothetical protein	AGsETELGVPTTVTPSSDLGGR	TGGT1_248420;S694	0.894155	0.867176	1.003	1.02127	0.563257	0.000452191	0.869772
Sin3-associated polypeptide SAP18	RAsASPRPGSEGAENALQK	TGGT1_201400;S79	NaN	NaN	0.918173	0.873226	0.818414	0.0010976	0.869938
hypothetical protein	GAKEESESSSsQLGTEK	TGGT1_217480;S359	NaN	NaN	0.932567	0.919392	0.758157	0.00412751	0.870039
hypothetical protein	EKEEEsEAGEGQSEK	TGGT1_297210;S1004	NaN	NaN	1.07017	1.03839	0.501618	0.0421229	0.870059
hypothetical protein	QNLQKEEFETLsPR	TGGT1_316570A;S279	NaN	NaN	0.958024	0.882083	0.770337	0.00390113	0.870148
hypothetical protein	GHHsPHPGPLPPPVPPR	TGGT1_247520;S112	NaN	NaN	0.912975	0.89153	0.8061	0.00140421	0.870202
vacuolar (h+)-atpase g subunit protein	SSASASAEAGDALNHEQsLPHK	TGGT1_228200;S141	NaN	NaN	0.894882	0.85285	0.863177	0.000211068	0.870303
MORN repeat-containing protein	VAGtGGHsPTENTER	TGGT1_313290T42;;S46	1.05297	NaN	0.675624	0.823616	0.929342	0.00166595	0.870389
hypothetical protein	LRsGGQFPPTR	TGGT1_283510;S85	NaN	0.824984	0.796724	0.816558	1.04341	0.000641119	0.870419
rhoptry protein ROP8	GFAPPETtAER	TGGT1_363030T452	NaN	0.528463	0.970888	0.947007	1.0357	0.00484762	0.870515
Sec61beta family protein	GVPAssQGILR	TGGT1_211040;S49;;S50	0.635801	NaN	0.939014	1.01088	0.896684	0.0017687	0.870595
putative zinc carboxypeptidase	GLSAGsGK	TGGT1_253170;S2178	NaN	NaN	1.00108	0.840328	0.770521	0.00609089	0.870643
AP2 domain transcription factor AP2XII-4	RPVAFLPLASRPAsPTGLGGGLGAPGR	TGGT1_247700;S1256	NaN	NaN	1.19817	0.742358	0.671564	0.0340886	0.870697
hypothetical protein	AASSSSKPASSHTGNHGEAQETTsDGDLNPAEK	TGGT1_220510;S449	NaN	NaN	0.935711	0.796917	0.879781	0.0021367	0.870803
hypothetical protein	RRsDGSLEGHR	TGGT1_213040;S1020	NaN	NaN	0.76598	0.799216	1.04739	0.0102344	0.870862
hypothetical protein	DQLVSDSVFGSPGSGPAyLPSDPLRPR	TGGT1_313370Y1149	NaN	NaN	0.837251	1.01481	0.7606	0.00739054	0.870887
CW-type Zinc Finger protein	KTsLSEETLAK	TGGT1_221200A;S616	0.566617	NaN	0.739018	1.0857	1.09223	0.00689638	0.870891
RNA recognition motif-containing protein	VKGEEtPHSFQVAR	TGGT1_265250T1322	0.900609	NaN	1.04423	0.884892	0.654616	0.0016928	0.871087
hypothetical protein	DSVETPGsPR	TGGT1_306020;S6687	NaN	0.670273	0.962617	0.94076	0.911132	0.00101724	0.871195
hypothetical protein	ASGSEYGsWDHEFNATEAAAEAILR	TGGT1_221630;S1275	NaN	NaN	0.748235	0.75419	1.11141	0.0184693	0.871278
hypothetical protein	RLVQSLSDFAETsPR	TGGT1_244550;S422	NaN	NaN	0.937468	0.855169	0.821924	0.00154913	0.87152
CAM Kinase family, incomplete catalytic triad	AFSAVSSSsFNASDR	TGGT1_253940;S19	NaN	NaN	0.759743	0.705219	1.14974	0.0248357	0.871567
hypothetical protein	RALsAQGTEK	TGGT1_320080;S1493	NaN	NaN	0.867038	0.720183	1.02757	0.010213	0.871597
PLU-1 family protein	sSLSQGSAsPPLGVQPPESLK	TGGT1_253750;S4881; ;S4889	NaN	NaN	1.02996	0.886051	0.698959	0.0118702	0.871657
eukaryotic translation initiation factor 3 subunit 6 interacting protein	EEGAQVGHEEDDsLSPDSR	TGGT1_273460;S31	NaN	NaN	0.983333	0.867462	0.764384	0.00522187	0.871726
hypothetical protein	RWtSFLPETQQDTAFYGR	TGGT1_271930T154	NaN	0.856133	0.952125	0.831913	0.846934	6.70725e-05	0.871776
hypothetical protein	ALSASSGGMsDSQK	TGGT1_232800;S370	NaN	NaN	0.978505	0.833807	0.803044	0.00382804	0.871785
cwf21 protein	MDPEDTRsADRER	TGGT1_282140;S356	NaN	1.04307	0.830907	0.917482	0.696135	0.00126242	0.871898
RNA recognition motif-containing protein	GGRsDDAHDAAAYDTDPR	TGGT1_217540;S208	1.01327	0.887571	0.749729	0.713477	0.997103	0.00014457	0.87223
trehalose-phosphatase	RNsVSSDENR	TGGT1_297720;S1030	1.12719	NaN	0.713036	0.865417	0.783838	0.00236721	0.872369
hypothetical protein	SQFAAASFWAIDDGEAAtPGR	TGGT1_244690T103	NaN	NaN	0.780725	0.940833	0.895718	0.00297156	0.872425
hypothetical protein	RPTGQNAGDRPGQDsENEGDLERR	TGGT1_313270;S977	NaN	1.21853	0.741082	0.843103	0.687082	0.00534551	0.872448
hypothetical protein	SRPDsDKR	TGGT1_230000;S6042	NaN	NaN	0.887364	0.904067	0.826446	0.000729873	0.872626
hypothetical protein	RGGsVAEASR	TGGT1_247450;S345	0.903729	0.983391	0.89226	0.863088	0.720739	3.44404e-05	0.872641
rhoptry protein ROP18	MLPLQALEtAAFK	TGGT1_205250T528	NaN	NaN	1.03611	0.790259	0.791842	0.0086474	0.872737
RNA recognition motif-containing protein	TLGGFPsADSDEVDRR	TGGT1_211020;S130	0.7305	NaN	0.950577	0.860712	0.949176	0.000456989	0.872741
hypothetical protein	MLsTLLSAER	TGGT1_297070;S343	NaN	NaN	0.840204	0.804919	0.973276	0.00343158	0.8728
hypothetical protein	GLsLGLSSR	TGGT1_214600;S3341	NaN	0.924703	0.939905	0.941634	0.685625	0.000796998	0.872967
hypothetical protein	LEKStPDDTRSETDDTSGGTTEEQR	TGGT1_310170T933	NaN	NaN	0.991433	0.944681	0.682976	0.0118719	0.87303
longevity-assurance protein (LAG1) domain-containing protein	MAQASTSKsDSKK	TGGT1_283710;S336	NaN	0.987109	1.00884	0.771645	0.724763	0.00125071	0.873089
DEAD/DEAH box helicase domain-containing protein	RQEEGEtAEDREEEQR	TGGT1_211400T124	NaN	NaN	0.898402	0.866482	0.854969	0.000221227	0.873284
Sin3-associated polypeptide SAP18	KTsGASASNKR	TGGT1_201400;S43	NaN	NaN	0.938154	0.96736	0.714408	0.00826613	0.873307
bromodomain-containing protein	GVALPEATAGsQEAEAGTASPLSPAASSPEFLVPR	TGGT1_264640;S79	NaN	NaN	0.687245	0.962867	0.970292	0.0111792	0.873468
hypothetical protein	GFMSVPGsPR	TGGT1_291940;S288	NaN	NaN	0.841162	0.815463	0.964476	0.00275933	0.8737
hypothetical protein	ISGsREEDGDsSRPQIESVNR	TGGT1_248420;S433; ;S440	NaN	NaN	0.985493	0.882812	0.753028	0.00587295	0.873778
dense granule protein GRA7	SRQPALEQEVPEsGEDGEDARQ	TGGT1_203310;S227	0.849109	0.633317	1.1305	0.660335	1.09585	0.00112632	0.873822
DEAD-family helicase	SDGKDEDREGsGGR	TGGT1_298020;S368	NaN	NaN	1.00105	0.878212	0.742278	0.0072347	0.873847
slc30a2 protein	SPsDPDSSSRPCASFLR	TGGT1_251630;S217	NaN	1.14816	0.707705	0.858057	0.78152	0.00283974	0.87386
kelch repeat-containing protein	TVEGLAIAPLSsPSCSR	TGGT1_272030A;S243	NaN	NaN	0.8498	0.926991	0.845048	0.000922174	0.873946
hypothetical protein	EAsPGRETAGGDR	TGGT1_270930;S1108	0.956338	0.956205	0.861019	0.817884	0.77846	1.7161e-05	0.873981
RNA recognition motif-containing protein	GSILALLGGQGsEQNLR	TGGT1_283878;S173	NaN	NaN	0.745619	0.963504	0.913122	0.00562893	0.874082
hypothetical protein	SVAAVDLLEEMAsEER	TGGT1_315750;S97	NaN	NaN	0.879934	0.828099	0.914351	0.000821363	0.874128
FUSE-binding protein 2 / KH-type splicing regulatory protein	SPAQsSGDLVLSFLGTK	TGGT1_216670;S648	NaN	NaN	0.778162	0.97371	0.870756	0.00414756	0.874209
hypothetical protein	LTGTSSSEsPATSK	TGGT1_250820;S609	NaN	NaN	0.855228	0.778319	0.989959	0.00496503	0.874502
hypothetical protein	RPPsVFFINITHDPEGR	TGGT1_232130;S252	NaN	NaN	1.05174	0.796296	0.775726	0.0101468	0.874587
RNA recognition motif-containing protein	RSGEtAQKDEVQR	TGGT1_294710T558	NaN	0.715499	0.981291	0.879635	0.922696	0.000601963	0.87478
Sas10 C-terminal domain-containing protein	KLGGSGsAAEEFIR	TGGT1_316900;S74	NaN	NaN	0.884074	0.802721	0.937565	0.00200221	0.874787
hypothetical protein	LLHSAAsPSSVSR	TGGT1_290620;S670	NaN	NaN	0.936058	0.86596	0.822373	0.00142982	0.874797
3'5'-cyclic nucleotide phosphodiesterase domain-containing protein	AASDsPRR	TGGT1_293000;S697	0.616589	NaN	0.735849	0.879759	1.26767	0.00852179	0.874967
hypothetical protein	DHAPQsPVAAR	TGGT1_247450;S544	0.853034	0.945257	0.881115	0.921592	0.774127	8.04618e-06	0.875025
LNS2 (Lipin/Ned1/Smp2) protein	SAsQAAADAEQERER	TGGT1_230690;S214	0.933526	1.06569	0.795324	0.710467	0.870451	0.000132893	0.875091
hypothetical protein	SDGsLEGHR	TGGT1_213040;S1023	NaN	NaN	1.00108	0.950049	0.674566	0.0131602	0.875232
WD domain, G-beta repeat-containing protein	APAGDTsPKGPER	TGGT1_248290;S1615	0.754986	NaN	1.08508	0.911781	0.749511	0.00159792	0.87534
hypothetical protein	EADTESMLPSFVSAPsPVSALCR	TGGT1_286230;S49	NaN	NaN	0.743169	0.872247	1.01079	0.00770168	0.875402
leucine rich repeat protein	SSLSHLsPTSK	TGGT1_359190;S39	NaN	NaN	0.86481	0.895311	0.866173	0.000129095	0.875431
MORN repeat-containing protein	KPAQSAPsGLsQQSQQPAEHAVSLR	TGGT1_313290;S21; ;S24	NaN	NaN	0.751919	0.768251	1.10626	0.01696	0.875477
hypothetical protein	DDRGDsGDELR	TGGT1_230000;S6028	0.730486	NaN	1.06575	0.85975	0.846074	0.00108895	0.875515
bromodomain-containing protein	tASGVHGEAVCVEEVPQRK	TGGT1_263580T344	NaN	NaN	0.786154	1.05689	0.783651	0.0105533	0.875565
putative cell-cycle-associated protein kinase SRPK	VHPTPTTSsPPR	TGGT1_253440;S1385	NaN	NaN	0.831525	0.866022	0.929175	0.00106457	0.875574
AP2 domain transcription factor AP2XII-5	KLGQDsDAGESVDLYR	TGGT1_247730;S925	NaN	0.837177	1.07355	0.891496	0.701237	0.00146279	0.875865
acetyltransferase, GNAT family protein	sHGESFDTPGRR	TGGT1_305450;S128	NaN	NaN	0.839683	0.809066	0.979058	0.00354783	0.875936
KOW motif domain-containing protein	IDDLDFDGHLLtPR	TGGT1_233000T1029	NaN	NaN	0.914815	0.998845	0.714661	0.00912951	0.876107
phosphoglycerate mutase family protein	SPsEDADAHCKK	TGGT1_258540;S2147	0.727952	NaN	0.976869	0.873159	0.926704	0.000502388	0.876171
hypothetical protein	EVSsPLPESANLDEDETALSGPGR	TGGT1_209500;S2787	NaN	NaN	0.936782	1.02468	0.667264	0.0147265	0.876242
hypothetical protein	ASLsPAEDAEEHLPEGDEDDLFGEE	TGGT1_312260;S883	NaN	1.19844	0.730827	0.667006	0.908705	0.00517137	0.876244
alveolin domain containing intermediate filament IMC14	GLQISTCNTMAYsPSLATPR	TGGT1_260540;S597	NaN	NaN	0.768178	0.730837	1.12973	0.0204287	0.876248
hypothetical protein	KGDVPEDADDEsEGAGEQK	TGGT1_248940;S287	0.733677	0.0197741	1.30652	1.39056	0.930873	0.0234231	0.876281
poly(ADP-ribose) polymerase and DNA-Ligase Zn-finger region domain-containing protein	RNEKEEtDNEELPSK	TGGT1_293510T205	NaN	0.824742	0.920108	0.96772	0.79319	0.000218555	0.87644
hypothetical protein	GERGEsERVER	TGGT1_275990;S261	0.689131	1.37203	0.763249	0.848399	0.709648	0.00230526	0.87649
microtubule associated protein SPM2	LVCQVDHAKKsPL	TGGT1_286590;S355	NaN	0.808752	0.93082	0.85991	0.906754	6.40426e-05	0.876559
hypothetical protein	sCSRGSLDEDESERPTAGK	TGGT1_206670;S1901	NaN	NaN	0.842532	0.744027	1.04317	0.00993217	0.876576
hypothetical protein	GRsREsSEGGR	TGGT1_247450;S156; ;S159	NaN	NaN	0.609907	0.810615	1.20945	0.0381013	0.876657
regulator of chromosome condensation RCC1	TTTGsPPEVEWR	TGGT1_213900;S94	NaN	0.423869	0.977778	1.07057	1.03469	0.0103885	0.876727
AP2 domain transcription factor AP2X-7	IYWGSsPGDEQDASLLAAGR	TGGT1_214840;S1393	NaN	NaN	1.02783	0.838085	0.764459	0.00791136	0.876791
CDP-alcohol phosphatidyltransferase superfamily protein	KDGVsGGK	TGGT1_261760;S397	NaN	NaN	0.993949	0.909653	0.726823	0.00798871	0.876808
hypothetical protein	LAPNSGVVsFGEsAAGSGTFDSEELQNYLKR	TGGT1_316340;S71;;S75	NaN	NaN	0.814881	0.8341	0.981529	0.00358462	0.876837
ATG C terminal domain-containing protein	RGDGEsEGERR	TGGT1_304630;S6757	0.777936	NaN	0.818822	1.06422	0.846921	0.00084104	0.876975
hypothetical protein	ESTQESsEK	TGGT1_308860;S241	NaN	NaN	0.836842	0.838653	0.955638	0.0020019	0.877044
putative phosphatidylserine synthase	ASSPSMAECsPR	TGGT1_273540;S38	NaN	NaN	0.94491	0.841283	0.845492	0.00148678	0.877228
hypothetical protein	KGGVAsPPLASSPNK	TGGT1_225910;S812	NaN	NaN	0.944391	0.765921	0.921476	0.00405914	0.877263
hypothetical protein	tLETVPLASVEEAAEPVLQR	TGGT1_239400T214	NaN	NaN	0.836562	0.977165	0.818182	0.00325979	0.877303
Sin3-associated polypeptide SAP18	ANKGGsEsPR	TGGT1_201400;S200;;S202	NaN	NaN	0.897241	0.843425	0.891304	0.000376834	0.877323
signal peptidase	RLsPQAHGGDRAPSVLVGGEEAK	TGGT1_214090;S1279	NaN	1.00165	0.85473	0.818464	0.834574	0.000241511	0.877355
SAG-related sequence SRS29B	AVTLsSLIPEAEDSWWTGDSASLDTAGIK	TGGT1_233460;S118	NaN	NaN	0.700285	0.700557	1.23123	0.0383465	0.877357
hypothetical protein	SFSQPAASAGSDVVsPR	TGGT1_290620;S832	NaN	NaN	0.901923	0.973963	0.756969	0.0052447	0.877618
PLU-1 family protein	VGAAAAGTPGVDsDADR	TGGT1_253750;S7772	0.838095	NaN	0.972624	0.89391	0.806247	0.000157028	0.877719
Sin3-associated polypeptide SAP18	AsAsPRPGSEGAENALQKK	TGGT1_201400;S79;;S81	NaN	NaN	0.943863	0.937086	0.752344	0.00507025	0.877764
RNA recognition motif 2 protein	TLLSVTEDSAEGFRtPTTSK	TGGT1_313910T389	NaN	NaN	0.85464	0.930015	0.848778	0.000886726	0.877811
hypothetical protein	APSRPGPSEsFGK	TGGT1_245640;S32	NaN	0.903287	0.722594	0.949696	0.935667	0.000469579	0.877811
hypothetical protein	LGVEIEADKGsVTSVR	TGGT1_286510;S283	NaN	NaN	0.830523	0.992982	0.809982	0.00431948	0.877829
hypothetical protein	GsPSIQRPEREESAVPTGGQQCPWGAENER	TGGT1_309960A;S446	NaN	NaN	0.76513	0.954391	0.914214	0.00427286	0.877912
hypothetical protein	EQsWGHEQEGLDAFR	TGGT1_236930;S3818	NaN	NaN	1.09821	0.861426	0.674429	0.0189497	0.878022
hypothetical protein	GGsDDLPTAEGEVEDR	TGGT1_229470;S64	1.15311	0.544892	0.98567	0.885864	0.821174	0.000941019	0.878143
hypothetical protein	SPSAPDRTLtEEEK	TGGT1_265260T175	NaN	NaN	1.00798	0.979457	0.648268	0.0168314	0.878568
AP2 domain transcription factor AP2VIII-2	ALDLsPGRR	TGGT1_233120;S1026	NaN	NaN	0.885228	0.875692	0.874824	1.43891e-05	0.878581
protein kinase	FSsDPGSGNTMSVLNPR	TGGT1_231070;S596	NaN	NaN	0.88059	0.887721	0.867654	4.46751e-05	0.878655
hypothetical protein	ADLSILRsEREDLLAQQR	TGGT1_254000;S254	NaN	NaN	0.852273	1.042	0.741724	0.00981149	0.878666
surface antigen repeat-containing protein	EVDLGHtPEGEQTQPDGEGRPEELR	TGGT1_213392T527	NaN	1.23026	0.728949	0.755399	0.801994	0.00500628	0.87915
zinc finger (CCCH type) motif-containing protein	RLPAsNDALETSANSTSQLRP	TGGT1_202900;S1282	NaN	NaN	0.763916	0.924924	0.948746	0.00433094	0.879195
hypothetical protein	LTDNPPATIsPSCTSVR	TGGT1_225690;S1534	NaN	NaN	0.865809	0.799302	0.973623	0.00331785	0.879578
hypothetical protein	AGEGERGsDEECEATASALTGSEK	TGGT1_314540;S436	NaN	NaN	0.893913	1.06807	0.677372	0.0161013	0.879785
Ser/Thr phosphatase family protein	GAsAFSSR	TGGT1_269460;S512	NaN	NaN	0.851888	0.855689	0.932371	0.000886431	0.879983
hypothetical protein	LLQPVPLSATEMAAICQEPIHEADEEEsDGER	TGGT1_242570;S661	NaN	1.10578	0.729332	0.928463	0.75654	0.00207273	0.880029
hypothetical protein	AKEEAEEsEGEAADNFESSFIPIQPGAETVEIENDLR	TGGT1_311230;S870	NaN	NaN	0.744517	0.668112	1.22749	0.0373905	0.88004
RNA recognition motif 2 protein	STYQLGGYVsPGQQADVLR	TGGT1_313910;S355	NaN	NaN	0.85464	0.9448	0.840819	0.00136944	0.880086
hypothetical protein	DAsLGDSR	TGGT1_237290;S1706	NaN	NaN	0.971676	1.16012	0.508581	0.0451239	0.880126
hypothetical protein	KEGDKsPPLAGDSR	TGGT1_214140;S205	NaN	NaN	0.960837	0.878343	0.801239	0.00272995	0.88014
rhoptry neck protein RON1	SESEGQGsAAK	TGGT1_310010;S629	0.576803	0.859967	0.936997	0.973659	1.0533	0.000426439	0.880145
hypothetical protein	AGSVFGAsDADIVHSGPsFSGLR	TGGT1_220600;S492; ;S502	NaN	NaN	0.908011	0.958517	0.773973	0.0038908	0.880167
hypothetical protein	ERQsPEEAEEGR	TGGT1_218070;S1222	0.9158	NaN	0.956725	0.8784	0.770099	0.000206183	0.880256
hypothetical protein	RIESELSKIPsAR	TGGT1_258090;S913	NaN	NaN	0.957388	0.876317	0.807589	0.0024091	0.880431
hypothetical protein	APRsEEREFGDER	TGGT1_275990;S59	0.896546	NaN	0.89054	0.896422	0.838592	8.94677e-06	0.880525
hypothetical protein	ESSRNsMGDEGGAYAR	TGGT1_293630;S671	NaN	0.832747	0.87157	0.728674	1.08947	0.00137366	0.880615
putative cell-cycle-associated protein kinase SRPK	RKPDEEQFGsPCSR	TGGT1_253440;S1440	NaN	NaN	0.899742	0.859576	0.882664	0.000174596	0.880661
PHD-finger domain-containing protein	GLESGDDYAASSACDPLLTPGPPsPLHLEEQR	TGGT1_224260;S5135	NaN	NaN	0.775761	0.974482	0.891986	0.00425578	0.880743
hypothetical protein	LILPETsSPSADASAGQK	TGGT1_314540;S66	NaN	NaN	0.892754	0.937871	0.811679	0.00175232	0.880768
ribonuclease HI protein	ADQLACLGATLPsEGEEEIRA	TGGT1_220450;S649	NaN	NaN	0.903479	0.800203	0.939122	0.00222857	0.880935
Tyrosine kinase-like (TKL) protein	EEVDPVDGVVtPHR	TGGT1_301270T3157	0.738989	NaN	0.945918	0.876808	0.962058	0.000417906	0.880943
hypothetical protein	APDLAPHADVGGPDDsWHK	TGGT1_306020;S3818	NaN	NaN	0.860748	0.870027	0.912067	0.000321059	0.880947
hypothetical protein	LASCGDEsAGDEAPDCR	TGGT1_247380;S256	NaN	0.652517	0.734062	1.37763	0.759894	0.0133024	0.881026
putative RNA binding protein	DLPSGVWTAHGsRECQPPNTK	TGGT1_203540;S520	NaN	NaN	0.710359	0.785379	1.14738	0.022657	0.881039
hypothetical protein	VYTDNEIHsDGGHsVECPPPGSPIPQTTTFTSQAAPALQPR	TGGT1_226570;S43; ;S48	NaN	NaN	0.901009	0.888021	0.854175	0.000250936	0.881068
GCC2 and GCC3 domain-containing protein	ESPTPSRSPSGTtR	TGGT1_292020T7321	NaN	NaN	0.655622	0.896213	1.09248	0.0199282	0.881438
rhoptry neck protein RON9	QAEEQANASQSsEtPAEENAEEPK	TGGT1_308810B;S330;T332	NaN	NaN	0.865787	0.906425	0.872134	0.000204984	0.881449
vacuolar transporter chaperone VTC2	AAsVKEDR	TGGT1_298630;S338	NaN	NaN	0.997283	0.896255	0.751244	0.00649596	0.881594
hypothetical protein	AERGsTSQK	TGGT1_250820;S12	NaN	NaN	0.748883	0.714159	1.18211	0.0279313	0.881717
rhoptry protein ROP18	ERDGEVsGSAADSSSRPR	TGGT1_205250;S133	0.776356	NaN	0.735479	0.754517	1.26095	0.00607851	0.881825
hypothetical protein	AGSAsPPESQR	TGGT1_289120;S67	0.797009	NaN	0.854189	0.94154	0.934741	0.000131877	0.88187
FYVE zinc finger domain-containing protein	GSFFGRDPsDLSR	TGGT1_237870;S448	NaN	NaN	0.731544	0.79797	1.11647	0.0176621	0.881995
hypothetical protein	GRGsEDGVVAQGVGEHVK	TGGT1_316490;S333	NaN	NaN	0.844473	0.912433	0.889494	0.000511617	0.882133
endonuclease IV APN	GVsGSGKPVVSK	TGGT1_288680;S253	NaN	1.27965	0.641925	0.592447	1.01482	0.0122847	0.882212
Sec23/Sec24 trunk domain-containing protein	RRPsPEPSASSPSPSTFELASR	TGGT1_226510;S477	NaN	0.978391	0.991088	0.804074	0.75533	0.000684905	0.882221
putative adenylosuccinate lyase	SDsGGDEGLR	TGGT1_277760;S379	0.961226	0.970238	0.841352	0.823686	0.814931	1.36643e-05	0.882287
hypothetical protein	EMVPPGLRtPPSFEDGNAVSNSSR	TGGT1_228150T235	NaN	NaN	0.973669	0.945732	0.72765	0.00767911	0.88235
HCNGP family protein	EAGESSEIVGGDGGLtPPPAAAAR	TGGT1_217440T47	NaN	NaN	0.75391	1.05455	0.838613	0.0101327	0.882358
putative omega secalin	LPsPQGSSSSTSLSLGTAHR	TGGT1_231960;S486	NaN	0.355268	1.38678	1.03193	0.755632	0.0271768	0.882403
hypothetical protein	APEATHHssAEEEESKIK	TGGT1_212140;S750;;S751	NaN	NaN	0.906573	0.880473	0.860465	0.000228723	0.882504
rhoptry protein ROP5	VPGTDsLAFGSCTPLPDFVQTLIGR	TGGT1_308090;S486	NaN	NaN	0.712157	0.781609	1.15391	0.023308	0.882559
rhoptry neck protein RON9	QTEEPEEAsQSTHSPAEEQSPEQAQGQER	TGGT1_308810B;S423	0.694539	NaN	0.924022	0.913325	1.00044	0.000893296	0.883081
hypothetical protein	LREPVSGtPR	TGGT1_239400T881	NaN	0.767529	0.981619	0.889629	0.893869	0.000270108	0.883162
hypothetical protein	EEGNSGsPGDVQR	TGGT1_264130;S372	0.965741	0.831632	0.836715	0.803051	0.978793	1.80232e-05	0.883186
vacuolar (h+)-atpase g subunit protein	GGSGEPPGtPR	TGGT1_228200T55	0.948279	0.860557	0.941662	0.953368	0.712121	4.34407e-05	0.883197
hypothetical protein	GAGLVsPPETSRPGASAEPR	TGGT1_230000;S4439	NaN	NaN	0.942824	0.974974	0.731921	0.00736605	0.88324
hypothetical protein	GRsGDSGLSAR	TGGT1_311230;S3724	0.880553	1.02126	0.987002	0.857706	0.670401	0.000136972	0.883385
putative phosphatidylinositol synthase	VGsASGGK	TGGT1_207710;S22	NaN	0.618271	0.948192	0.755928	1.21367	0.00636677	0.884015
Pumilio-family RNA binding repeat-containing protein	SCHLEVDDNGsGRR	TGGT1_260600;S538	NaN	NaN	0.866066	0.857625	0.928643	0.000641234	0.884111
hypothetical protein	RIDNVFQDGEAARPPsPAPK	TGGT1_278720;S508	NaN	NaN	0.89716	0.931467	0.823748	0.00128886	0.884125
RNA pseudouridine synthase superfamily protein	QKDAPLsPSSGEGGVR	TGGT1_306660;S5225	NaN	1.04885	0.935979	0.795918	0.756492	0.000940362	0.88431
ribosomal protein RPL6	RQLYKsPAGAAK	TGGT1_313390;S154	NaN	1.05035	0.974972	0.685323	0.826618	0.00164428	0.884315
formate/nitrite transporter protein	GNPGTNPPSKsPESSATGGTGAAASPTATS	TGGT1_209800;S393	NaN	NaN	0.87517	0.898545	0.879518	6.5858e-05	0.884411
DNA-directed RNA polymerase I RPA43	TAESRGEDDsEEESKGSHENHR	TGGT1_246630;S460	NaN	NaN	0.953418	0.858757	0.841951	0.00153443	0.884709
hypothetical protein	sGSVTGAGPESEAAAEAATTLAK	TGGT1_239410;S715	NaN	NaN	1.01913	1.09109	0.544293	0.0355877	0.884838
hypothetical protein	GGLAGRDsDEDFVP	TGGT1_209500;S2930	NaN	NaN	0.961207	0.944719	0.748768	0.00589288	0.884898
Ser/Thr phosphatase family protein	tASPGETSLPTK	TGGT1_269460T774	NaN	NaN	1.03582	0.767808	0.851217	0.00791181	0.884948
hypothetical protein	GPSYsPDRR	TGGT1_212220;S92	0.943371	NaN	0.818182	0.591133	1.18765	0.00571918	0.885084
ATG C terminal domain-containing protein	QAsSEEKR	TGGT1_304630;S1437	NaN	NaN	0.974836	0.926012	0.754553	0.00564638	0.885134
hypothetical protein	SQtLEsTGVPQLSLAR	TGGT1_315750T26;;S29	NaN	NaN	0.917324	0.957025	0.781321	0.00359234	0.885223
guanylyl cyclase	LQsNSSAK	TGGT1_254370;S1786	NaN	NaN	0.830189	0.871147	0.954351	0.00169833	0.885229
helicase associated domain (ha2) protein	SAsGVGGPR	TGGT1_318440;S1741	0.694452	1.08086	0.804966	0.831056	1.01485	0.000238099	0.885236
MSP (Major sperm protein) domain-containing protein	GGYGGAsGSQGGSYSADLK	TGGT1_318160;S154	NaN	NaN	0.85045	0.918425	0.886972	0.000491856	0.885282
putative cell-cycle-associated protein kinase PRP4	SVDRsPER	TGGT1_313180;S94	NaN	NaN	0.81684	0.821138	1.01859	0.00559983	0.885523
DUF803 domain-containing protein	VAGGVHGSLAsPDASPTATR	TGGT1_312622;S787	NaN	NaN	0.951899	0.892337	0.81247	0.0020739	0.885569
MIF4G domain-containing protein	GSDAsDNAPVR	TGGT1_269180;S925	1.0368	0.765605	0.765923	0.860344	0.999455	0.000100794	0.885626
hypothetical protein	FVGVLSSAGEGsDREDGK	TGGT1_306020;S2021	NaN	0.772312	1.11215	0.786914	0.871843	0.00149669	0.885805
malic enzyme	LHADAsEEK	TGGT1_286440;S104	NaN	NaN	0.992428	0.879696	0.785781	0.00451533	0.885968
DHHC zinc finger domain-containing protein	SFVLPSTSSPsPPK	TGGT1_249380;S39	NaN	NaN	0.938078	0.837743	0.882121	0.00107177	0.885981
histidine acid phosphatase superfamily protein	RPAASSPGsQEFFR	TGGT1_304650;S1604	NaN	NaN	0.936497	0.949349	0.772152	0.00411974	0.885999
hypothetical protein	SLDREEsINR	TGGT1_262935;S396	NaN	NaN	0.830028	0.751599	1.07639	0.0119776	0.886006
hypothetical protein	AsSDVSRDPAK	TGGT1_238390;S516	NaN	NaN	0.961424	0.795614	0.901612	0.00297924	0.886217
IgA-specific metalloendopeptidase	LEWTPVsPPSSFLLTSWTEPR	TGGT1_226950;S664	NaN	NaN	1.04083	0.775141	0.843089	0.0079867	0.886353
transporter, major facilitator family protein	RGsDSSPGTITANQEDLSMGK	TGGT1_318150;S54	NaN	0.834211	0.949495	1.11468	0.647326	0.00288005	0.886428
hypothetical protein	GPsREASGTGR	TGGT1_211700;S1027	NaN	NaN	1.04183	0.822374	0.795322	0.00766286	0.886509
hypothetical protein	ANsEKDGESVPKEEEK	TGGT1_237520;S77	NaN	NaN	1.09686	0.848826	0.714132	0.0156095	0.886606
hypothetical protein	SFEELsPSELVAPSR	TGGT1_289880;S179	NaN	NaN	0.824908	0.796187	1.03888	0.0073736	0.886658
hypothetical protein	EALRPAtPTAK	TGGT1_242700T697	NaN	NaN	1.12022	0.864815	0.675214	0.0204923	0.88675
hypothetical protein	ERGNsDDFDRR	TGGT1_212220;S61	0.991339	1.13552	0.71389	0.715181	0.878359	0.000401115	0.886858
ELMO/CED-12 family protein	RPESGDDRsPSSAR	TGGT1_253000;S291	NaN	NaN	0.855193	0.78222	1.02374	0.00643748	0.887051
hypothetical protein	IVEMLEtQR	TGGT1_225160T237	NaN	NaN	0.810319	0.766798	1.08438	0.012323	0.887166
regulator of chromosome condensation (RCC1) repeat-containing protein	AEtDDELR	TGGT1_313860T1481	0.81057	NaN	0.843575	0.951157	0.943385	0.000139093	0.887172
DHHC zinc finger domain-containing protein	SVsGHVsPADEGGFSADR	TGGT1_250870;S23;;S27	NaN	NaN	0.929513	0.922756	0.809449	0.00192109	0.887239
SWI2/SNF2-containing protein	sAGADETLK	TGGT1_245720;S719	NaN	NaN	0.893499	0.904828	0.863503	0.000193009	0.887277
transporter, major facilitator family protein	VSGEENPVDAVGQASASQLSDGQTIsEEESEAR	TGGT1_253700;S973	NaN	NaN	0.941295	0.822057	0.89878	0.00154234	0.887377
hypothetical protein	TAEEIEEDALSAQFPsFAEDTPR	TGGT1_241000;S226	NaN	NaN	0.84103	0.825011	0.997839	0.00383306	0.88796
hypothetical protein	TPPsPPPAPK	TGGT1_235340;S554	NaN	NaN	0.870387	0.875932	0.918377	0.000291071	0.888232
hypothetical protein	VAGDDENsWENLVQK	TGGT1_246220;S516	NaN	NaN	0.645287	1.23546	0.784153	0.0379459	0.8883
RNA recognition motif-containing protein	RDsRDFFPSR	TGGT1_209850;S1389	0.897863	0.674907	1.07357	1.01299	0.783356	0.000261167	0.888537
putative translation initiation factor IF-2	TETPEDAEEAESsR	TGGT1_214270;S453	NaN	NaN	0.822448	0.910939	0.932258	0.00142842	0.888548
hypothetical protein	EGTGFVAQLGGEGSEAsPR	TGGT1_239410;S2074	NaN	NaN	0.98921	0.926841	0.75	0.00643608	0.888684
PRP38 family protein	EERPGEsEGDRR	TGGT1_285230;S399	NaN	NaN	0.903525	1.01205	0.750679	0.00719792	0.888751
hypothetical protein	NRsDEsLRGGIDGSETSGK	TGGT1_263660;S120;;S123	NaN	NaN	0.921444	0.960447	0.784372	0.00358957	0.888754
phospholipase, patatin family protein	QVsLRAEAPEDEPGETLMSHR	TGGT1_212130;S472	NaN	0.491812	1.01494	0.978404	1.07075	0.00693917	0.888977
hypothetical protein	GLNRPsFSR	TGGT1_253140;S1204	NaN	NaN	1.06053	0.918451	0.687957	0.0145865	0.888979
brix domain-containing protein	ACLQsGEALRDASEAsDEER	TGGT1_273840;S289; ;S300	NaN	NaN	0.736965	0.800221	1.13063	0.0183215	0.889272
LNS2 (Lipin/Ned1/Smp2) protein	GGsAGADAPGPK	TGGT1_230690;S417	NaN	0.617921	0.968034	0.933394	1.03833	0.00243252	0.88942
hypothetical protein	RRsEGFDSDTR	TGGT1_289880;S771	0.781601	0.760138	0.954044	0.905583	1.04599	7.67924e-05	0.889471
GAP45 protein	HIDLsDAPLLN	TGGT1_223940;S239	NaN	0.962017	0.790868	0.884992	0.920417	0.000151081	0.889574
eIF2 kinase IF2K-A (incomplete catalytic triad)	RSsFPVESASQR	TGGT1_229630;S3829	NaN	NaN	0.854202	0.90577	0.911044	0.000414504	0.890339
hypothetical protein	NEPNtPDAR	TGGT1_261430T796	1.20928	NaN	0.724631	0.820652	0.807213	0.00377392	0.890445
phosphoglycerate mutase family protein	FLLRPAHsAPSLR	TGGT1_258540;S1749	NaN	0.89938	1.09736	0.888361	0.676704	0.00191659	0.890451
hypothetical protein	SVPsASDLELMSK	TGGT1_263320;S327	NaN	NaN	0.698515	0.729659	1.2438	0.0372182	0.890658
rhoptry protein ROP5	GPAsSVPVTYAPR	TGGT1_308090;S421	0.834601	0.947298	NaN	NaN	NaN	0.0402099	0.89095
NAD(+)/NADH kinase domain-containing protein	CAFsAGALLAAFPEEEQSR	TGGT1_244700;S1939	NaN	NaN	0.991441	1.11031	0.571749	0.0319962	0.891167
GYF domain-containing protein	GPPELRsPTSLAAVTAAAVDALTQQYPQLTK	TGGT1_204160;S1456	NaN	NaN	0.744956	1.07375	0.854981	0.0115522	0.891229
hypothetical protein	SsAPASPR	TGGT1_294340;S80	NaN	0.635191	1.01602	0.974882	0.9392	0.00196974	0.891323
hypothetical protein	GGEGLQGDSELsEKELAEPR	TGGT1_214140;S1655	NaN	NaN	0.921674	1.14525	0.607245	0.029305	0.89139
RNA helicase (UPF2 interacting domain) protein	QTtLGQAAFADLEVASVDAFQGR	TGGT1_291820T1062	NaN	NaN	1.19416	0.819882	0.660275	0.0300868	0.891439
hypothetical protein	VGsKAEVK	TGGT1_248740;S102	NaN	NaN	0.890842	0.975904	0.807763	0.00295131	0.891503
hypothetical protein	ALGLGsGKHDEGR	TGGT1_269990;S984	NaN	NaN	0.855906	0.988358	0.83043	0.00300111	0.891565
hypothetical protein	VHALAsDGGRsR	TGGT1_205680;S789; ;S794	NaN	NaN	0.845281	0.919118	0.911137	0.000687466	0.891845
hypothetical protein	KGGVSDVEICGSHVsSEALEGR	TGGT1_213610;S594	NaN	NaN	0.767822	0.860785	1.04696	0.00836072	0.891856
hypothetical protein	AASGSATGERtPSAESANER	TGGT1_283550T2985	NaN	NaN	0.865689	0.786429	1.0235	0.00604819	0.891873
AP2 domain transcription factor AP2X-1	GTPGSPPQDVLPALPASSSSPSTGGGSPLsPPPGQAPR	TGGT1_227900;S332	NaN	NaN	0.740594	0.987835	0.947271	0.00728676	0.8919
FUSE-binding protein 2 / KH-type splicing regulatory protein	EVVASPVASAsGAGsPGGATSLVFPVPIAR	TGGT1_216670;S465; ;S469	NaN	NaN	0.773715	0.849562	1.05257	0.0085975	0.891949
calcium-dependent protein kinase CDPK3	SSVTTTSNsGALLDEVAVLK	TGGT1_305860;S118	NaN	NaN	0.737592	0.780338	1.15792	0.0216937	0.89195
hypothetical protein	SsKGHsDAGK	TGGT1_250820;S69; ;S73	NaN	NaN	1.09473	0.945133	0.636239	0.022143	0.892034
putative U5 snRNP-associated subunit	GGRtPDQIKDEK	TGGT1_205220T1047	NaN	NaN	0.961923	0.869794	0.844629	0.00159324	0.892115
hypothetical protein	KtSNEEIHK	TGGT1_225160T95	NaN	NaN	0.909459	0.796937	0.970343	0.00322496	0.892246
hypothetical protein	RKsEQsDDGGQSLR	TGGT1_204490;S253; ;S256	NaN	NaN	0.948934	1.02958	0.698227	0.0122724	0.892247
dynamin-related protein DRPB	ALSSSGVFDsKGASASAAK	TGGT1_321620;S833	NaN	NaN	0.890423	0.803095	0.98323	0.00338041	0.892249
hypothetical protein	QVCEEPRLsACDSFSSLPR	TGGT1_252430;S408	NaN	NaN	0.864182	1.06007	0.752613	0.00999044	0.892288
hypothetical protein	EKTEEtETEEQTK	TGGT1_242700T1475	NaN	NaN	1.08689	0.891667	0.698955	0.0153819	0.892504
hypothetical protein	GGSAPNHQNHAHFVADEADCstEDGDESLSYMR	TGGT1_295360;S58;T59	0.470537	NaN	0.828079	0.962443	1.30899	0.0141998	0.892512
hypothetical protein	RLsVSVSR	TGGT1_306400;S848	NaN	NaN	0.91507	0.889673	0.873182	0.000186216	0.892642
hypothetical protein	sPGNLsPAAVAAGK	TGGT1_308860;S635;;S640	NaN	NaN	0.87193	0.957149	0.848891	0.00135767	0.892657
bromodomain-containing protein	EIEVNsPR	TGGT1_264640;S1102	0.811883	0.887552	0.883163	0.95049	0.930514	3.06457e-06	0.89272
hypothetical protein	IGLSDSDLLDFHsDDEMPVAPAAQCHR	TGGT1_283510;S36	0.907466	1.09614	0.569509	1.09194	0.798774	0.000825632	0.892766
nucleoporin autopeptidase	SIsPGVVEPAEASR	TGGT1_259640;S2161	NaN	1.08023	0.968224	0.917397	0.605489	0.00310789	0.892835
surface antigen repeat-containing protein	DSQESAERRsER	TGGT1_212880;S3985	NaN	NaN	0.68925	0.779731	1.20992	0.030862	0.892967
hypothetical protein	GQGRNsEKGATDDDVAVDK	TGGT1_203290;S198	NaN	NaN	0.877398	0.824222	0.977294	0.00251521	0.892971
hypothetical protein	QEEREDsGGISIIGR	TGGT1_313440;S130	0.732892	0.491262	1.23333	1.03255	0.975082	0.00223722	0.893023
rhoptry protein ROP1	RLtSGASLGLR	TGGT1_309590T369	NaN	NaN	1.05438	0.827623	0.797291	0.00814837	0.893098
hypothetical protein	ATGEsVGR	TGGT1_311230;S3275	0.970576	0.909068	0.896832	0.919196	0.769927	1.14334e-05	0.89312
hypothetical protein	GASGGAAAADSGLLsPR	TGGT1_301410;S377	NaN	NaN	0.946429	0.929833	0.803489	0.00254351	0.89325
hypothetical protein	ALsPGPDDELSGQSGEHAEAK	TGGT1_240440;S170	NaN	NaN	0.649589	0.805064	1.22541	0.0351224	0.893354
hypothetical protein	WADEEIsGDEDDGLGVQTEER	TGGT1_261430;S909	NaN	1.35963	0.811347	0.789855	0.61309	0.0116591	0.89348
hypothetical protein	TIsVGTAQAAESLR	TGGT1_277710;S648	NaN	NaN	0.931522	0.828272	0.920651	0.00134129	0.893482
hypothetical protein	SAsSGTLLPGGRPK	TGGT1_228150;S894	NaN	0.983098	0.943978	0.848261	0.798618	0.000234612	0.893489
hypothetical protein	AASEsDVDAEFFDMHNR	TGGT1_268780;S5054	NaN	NaN	0.985539	0.978903	0.716194	0.00970995	0.893545
bromodomain-containing protein	APGPEVSGDStCSPPLHAASK	TGGT1_264640T25	NaN	NaN	0.903061	0.943785	0.833837	0.00128744	0.893561
hypothetical protein	ANsSVFSSGIR	TGGT1_238390;S763	NaN	NaN	0.969337	0.761404	0.949958	0.00546302	0.893566
RNA recognition motif-containing protein	GAsREREEK	TGGT1_209850;S45	NaN	1.13404	0.760611	0.705816	0.97422	0.00285808	0.893671
hypothetical protein	SERsPETRsQTsLNR	TGGT1_283510;S71; ;S76; ;S79	NaN	NaN	0.825283	0.750327	1.10572	0.01433	0.893777
CorA family Mg2+ transporter protein	NRDsGAEETER	TGGT1_305190;S21	NaN	NaN	1.01373	0.902241	0.765494	0.00638801	0.893822
acetyltransferase, GNAT family protein	GDsPDSITVRPFR	TGGT1_305450;S279	NaN	0.8453	0.885205	0.938187	0.907068	2.29207e-05	0.89394
transporter, major facilitator family protein	LANsPTAQSSPK	TGGT1_215490;S259	NaN	NaN	0.939753	0.856546	0.886197	0.000740641	0.894165
cyclic nucleotide-binding domain-containing protein	RHsADGGPR	TGGT1_295850;S492	NaN	NaN	0.831404	0.874762	0.976455	0.00230296	0.894207
putative myosin heavy chain	VAsEAsDTPGR	TGGT1_208370;S1019;;S1022	NaN	NaN	0.955653	0.920266	0.806842	0.00250969	0.894254
MSP (Major sperm protein) domain-containing protein	TSGSSGDHVGGAGMSAAEGSGSsSR	TGGT1_318160;S145	NaN	NaN	0.799811	0.791842	1.09124	0.0119145	0.894298
hypothetical protein	GLQPIKETAGsKEFTLGNPAVQPAR	TGGT1_306020;S5667	NaN	NaN	0.868224	0.774978	1.03976	0.00743396	0.894321
hypothetical protein	RAEGGSDPSGsGASTR	TGGT1_209500;S2291	NaN	NaN	0.732759	0.899309	1.05105	0.0103975	0.894373
hypothetical protein	SAsQVsQTTNR	TGGT1_238390;S249; ;S252	0.733692	NaN	0.908012	0.982456	0.95335	0.000525586	0.894377
hypothetical protein	RLsSDsLRLPETGR	TGGT1_247450;S381;;S384	NaN	NaN	0.895356	0.92702	0.860883	0.000455606	0.89442
phosphatidylinositol transfer protein	VEAAPEASGAPQGsAGPSSEGEETR	TGGT1_289570;S362	NaN	NaN	0.967155	0.950669	0.765559	0.0051798	0.894461
LNS2 (Lipin/Ned1/Smp2) protein	AEDGsQAGDGDEKEGAGAGNEAGAGER	TGGT1_230690;S146	0.801217	NaN	1.03197	0.852288	0.892771	0.000369217	0.894562
hypothetical protein	SDLPDLPDHVENVsAEDLELLR	TGGT1_293470;S137	NaN	0.220019	1.16147	1.1104	1.08657	0.0285863	0.894615
hypothetical protein	VPSACGDDPGSVsPGRTEDVQFNVGGQLDLLK	TGGT1_234390;S18	NaN	NaN	0.93731	0.887922	0.858621	0.000658075	0.894618
hypothetical protein	RQGsETVASR	TGGT1_209500;S2345	NaN	NaN	0.926245	0.974334	0.783699	0.0040674	0.894759
hypothetical protein	VAPSSLTsIFDSDI	TGGT1_289880;S1320	NaN	NaN	0.845129	0.806627	1.03272	0.00603607	0.894825
hypothetical protein	DKEAVERHtPPGADQIELAGA	TGGT1_293430T399	NaN	0.388764	0.944746	1.08904	1.157	0.0143383	0.894887
hypothetical protein	RAGSSSsASGPTHQK	TGGT1_257430;S2163	NaN	NaN	0.914093	0.906324	0.864527	0.000295623	0.894981
eIF2 kinase IF2K-A (incomplete catalytic triad)	GsGAFWGAGAEAPR	TGGT1_229630;S4060	NaN	NaN	0.882218	0.860243	0.942529	0.000754524	0.894997
WD domain, G-beta repeat-containing protein	GESFSFLAFPQAsAEDFVPPFPR	TGGT1_273800;S517	NaN	NaN	1.25	0.874116	0.560976	0.046124	0.895031
hypothetical protein	SsPTVTACR	TGGT1_313430;S5430	0.825701	0.918385	0.916004	0.88926	0.925838	1.06961e-06	0.895038
hypothetical protein	MGGsDDEEEVLSTEAVR	TGGT1_223800;S507	1.0227	NaN	0.978525	1.00316	0.576093	0.00355499	0.895119
hypothetical protein	NMPEAVPDQRGsEDESEKK	TGGT1_202760;S158	0.951462	0.816751	1.19256	0.821035	0.693804	0.000455569	0.895123
hypothetical protein	RVsPDCRPGAGER	TGGT1_239885;S1113	NaN	NaN	0.992274	0.747851	0.945328	0.00692602	0.895151
phosphatidylinositol transfer protein	AVHIREsLSR	TGGT1_289570;S795	NaN	NaN	0.920667	0.883356	0.88161	0.000202404	0.895211
hypothetical protein	TSsLDRPLNR	TGGT1_262935;S248	NaN	NaN	0.962701	0.834235	0.889131	0.00172317	0.895356
hypothetical protein	KTQGGDDLQsDR	TGGT1_316650;S988	NaN	NaN	1.01258	1.0271	0.646452	0.0188007	0.895377
hypothetical protein	KPAEPGVAtPR	TGGT1_313430T4422	0.572205	NaN	1.05268	1.01766	0.939065	0.00390968	0.895402
GYF domain-containing protein	GGsPGRDGSIWGR	TGGT1_298610;S1617	NaN	1.03525	0.81403	0.858555	0.874399	0.000342067	0.895559
dynamin-related protein DRPB	AQQMLSSMQQSVTTIWSQNsREK	TGGT1_321620;S613	NaN	NaN	0.954271	0.786758	0.946161	0.00368646	0.89573
nucleoporin autopeptidase	VLPAHADsFPASPENR	TGGT1_259640;S1313	NaN	1.09566	0.824299	0.822335	0.840909	0.000894504	0.895801
hypothetical protein	SPGSsDPSQGSPTSRPGEAETSCR	TGGT1_311230;S3192	NaN	NaN	1.04143	0.886086	0.760017	0.00815211	0.895844
glideosome-associated protein with multiple-membrane spans GAPM3	MSPYYPAEETGAsAPLtAAGSMVMGGMK	TGGT1_271970;S288; T292	NaN	NaN	0.862663	0.897285	0.927606	0.000438289	0.895851
metal cation transporter, ZIP family protein	SPsGNTLK	TGGT1_254080;S234	NaN	NaN	0.834604	0.769428	1.08363	0.011228	0.895887
hypothetical protein	VGsGSLELR	TGGT1_309910;S1171	NaN	NaN	0.995079	0.855619	0.837231	0.00307938	0.895976
RNA pseudouridine synthase superfamily protein	SGPLLQGVVGSsPPLLPLAPAALAAEGR	TGGT1_306660;S5083	NaN	NaN	0.884127	0.846111	0.958354	0.00134978	0.896197
hypothetical protein	REESQSGEGTSsRR	TGGT1_250820;S1053	NaN	NaN	0.831099	0.929646	0.927887	0.0013173	0.896211
hypothetical protein	RTSDsLDGK	TGGT1_236870;S95	NaN	0.429381	1.24037	0.980759	0.934376	0.0132079	0.896222
hypothetical protein	IRPsGEGAGNK	TGGT1_225160;S58	NaN	NaN	0.990389	0.857213	0.84127	0.00277035	0.896291
Sin3-associated polypeptide SAP18	ESASEVGSSSAHsAsPERDVIPK	TGGT1_201400;S802;;S804	0.868042	NaN	0.935775	0.937559	0.84399	4.11626e-05	0.896341
RNA pseudouridine synthase superfamily protein	SSSTsPAAAK	TGGT1_306660;S3856	NaN	NaN	0.861376	1.00607	0.821656	0.00388544	0.896367
peptidyl-prolyl cis-trans isomerase	DRDsPFK	TGGT1_283850;S87	1.07254	NaN	0.917548	0.731919	0.863556	0.00104843	0.89639
hypothetical protein	AAGsGGPFAVR	TGGT1_239410;S1658	NaN	NaN	0.912212	0.969961	0.807922	0.00278439	0.896698
adaptin n terminal region domain-containing protein	QSsSGKGDR	TGGT1_221940;S381	NaN	NaN	0.963466	0.805206	0.9219	0.00277816	0.896857
reticulon protein	sTVSGMVGR	TGGT1_226430;S90	NaN	NaN	0.920533	0.833955	0.936114	0.00125293	0.896867
hypothetical protein	QMSTsQGLSILFSQGK	TGGT1_294790;S220	NaN	NaN	0.799838	0.980452	0.910314	0.00341818	0.896868
hypothetical protein	SSsPKDDCVDEDATCGDIGGER	TGGT1_292950;S407	NaN	NaN	1.16471	0.861702	0.66423	0.0253372	0.896881
hypothetical protein	TVsVTSGSGEK	TGGT1_212220;S683	NaN	NaN	1.04753	0.970891	0.672324	0.0158967	0.896915
hypothetical protein	KDGEsEDISEAAR	TGGT1_217480;S1123	NaN	NaN	0.960272	0.835099	0.895873	0.00161898	0.897081
hypothetical protein	SASRFsPR	TGGT1_290910;S820	NaN	NaN	1.04973	0.880975	0.760779	0.00861303	0.897161
hypothetical protein	APSsPSSSCSR	TGGT1_214610;S1349	NaN	NaN	0.737768	0.823335	1.13039	0.0171986	0.897164
hypothetical protein	GRSsGREEGPR	TGGT1_316650;S1224	NaN	NaN	0.927673	0.894194	0.869677	0.000350807	0.897181
hypothetical protein	VTALFTsPRH	TGGT1_263660;S279	NaN	NaN	0.82845	0.802234	1.06133	0.00831597	0.897338
hypothetical protein	AEGRDsPKGEGR	TGGT1_259650;S332	NaN	NaN	1.15527	0.792035	0.744742	0.0202525	0.897349
hypothetical protein	KQDKDAssDEDPADAAPAVGSLPLTK	TGGT1_270960;S69;;S70	NaN	NaN	0.954923	0.99587	0.741671	0.00762095	0.897488
thrombospondin type 1 domain-containing protein	ENSQENQNAEPGETHAETEEVEsNAsEKLAK	TGGT1_209060;S847;;S850	1.09135	NaN	0.854079	0.780209	0.864569	0.000910073	0.897552
hypothetical protein	TLQSSGYsPASAEQVEQAK	TGGT1_209500;S2818	NaN	NaN	0.851533	0.937809	0.903717	0.000780119	0.897686
hypothetical protein	AAVLsREHHSLSTR	TGGT1_246178;S44	NaN	NaN	0.97642	0.926233	0.790669	0.00379684	0.897774
PSP protein	TPLVGPGGSASFGsAPGTPFLGGASGAQTPAR	TGGT1_314740;S659	NaN	NaN	0.844578	0.882237	0.966527	0.00160862	0.897781
hypothetical protein	FAFPDAEPTSTVStPGGGDWGR	TGGT1_313590AT359	NaN	NaN	0.738393	1.02986	0.925353	0.00889569	0.897869
hypothetical protein	RPEAQGLSGRDsDGEGR	TGGT1_225230;S170	NaN	NaN	0.89246	0.935867	0.865651	0.000518588	0.897993
phospholipase/carboxylesterase	VVDATCERRsE	TGGT1_254690;S496	NaN	0.886673	0.957427	0.870633	0.877384	2.45746e-05	0.898029
hypothetical protein	EDALQEWNLVDDDLsDE	TGGT1_261430;S1070	NaN	NaN	0.808579	0.980525	0.90561	0.00305642	0.898238
Tyrosine kinase-like (TKL) protein	sSSSSAAAPATAPAPTAR	TGGT1_234970;S206	NaN	NaN	0.857977	0.901992	0.934963	0.000615683	0.898311
hypothetical protein	TPsPERVPIPEPR	TGGT1_246940;S220	NaN	0.556005	1.04245	0.873162	1.1217	0.00559351	0.898329
hypothetical protein	KDETQATVENGDSSVPVQAVKsEVsIADR	TGGT1_316340;S43; ;S46	NaN	NaN	0.775365	0.799606	1.12057	0.0149861	0.898514
hypothetical protein	sPsSTSPGLEK	TGGT1_311230;S3126;;S3128	0.875552	NaN	0.990658	0.998423	0.730289	0.000738774	0.898731
hypothetical protein	TSDAQDPQAsPPTHsPR	TGGT1_261430;S718;;S723	1.15265	NaN	0.758303	0.778533	0.9065	0.00218394	0.898997
hypothetical protein	GPAtPESK	TGGT1_237520T133	NaN	1.00917	0.848652	0.733333	1.00647	0.000888821	0.899406
ubiquitin carboxyl-terminal hydrolase family 2 protein	GLQNVPSLLPASFLsPSHAQAAVVDEK	TGGT1_289330;S1483	NaN	NaN	0.803493	0.948844	0.945961	0.00283322	0.899433
myosin F	ESLTVGSStPTTPQMTFGTHK	TGGT1_278870T1081	NaN	NaN	0.840734	0.879553	0.978017	0.00205718	0.899435
NLI interacting factor family phosphatase	LEAPsPHTPAAASVR	TGGT1_202550;S1597	NaN	0.896025	0.830036	0.904954	0.967099	6.65835e-05	0.899529
insulin-degrading enzyme	LQQPDAGQMSACQEELLSDRtPR	TGGT1_309850T147	NaN	NaN	1.16498	0.762577	0.771157	0.0210836	0.899571
hypothetical protein	sHGDGHGK	TGGT1_233870;S763	NaN	NaN	0.991777	1.00059	0.706558	0.0113283	0.899642
acid phosphatase GAP50	LAPADAtEAAAAENHGYPK	TGGT1_219320T166	NaN	NaN	0.8466	0.958001	0.894712	0.00128285	0.899771
hypothetical protein	SAPLsECEFLVASGR	TGGT1_225020;S12	NaN	NaN	1.02432	0.939216	0.73582	0.00892622	0.899785
hypothetical protein	VEsGGEASLQR	TGGT1_208010;S295	NaN	NaN	1.04947	0.835886	0.814273	0.00688507	0.899876
hypothetical protein	GACsRGGsDDLPTAEGEVEDR	TGGT1_229470;S60;;S64	NaN	NaN	0.905322	0.947946	0.84653	0.00106557	0.899933
hypothetical protein	HAEVPsGAGALVTEPIPR	TGGT1_250820;S932	NaN	NaN	0.834227	0.914159	0.952077	0.00148558	0.900154
hypothetical protein	IAPRsESSADPPR	TGGT1_216770;S32	0.962963	0.956002	0.904693	1.00157	0.676601	0.000100717	0.900366
hypothetical protein	GLCNADsLSGEQEASDKDNK	TGGT1_207720;S1210	NaN	NaN	0.827136	0.951	0.923148	0.00173159	0.900428
hypothetical protein	RPPASFEAsGTEGR	TGGT1_262460;S1895	NaN	1.38058	0.775839	0.637764	0.807582	0.0119341	0.90044
putative peptidyl-prolyl isomerase FKBP12	AAAAAAAGVCGEEAsETESPRK	TGGT1_228360;S23	0.790939	1.03677	0.98655	0.983996	0.704463	0.000153272	0.900544
phospholipid-translocating P-type ATPase, flippase subfamily protein	GVEASPPEAEPVLCSVEsPAGSR	TGGT1_247690;S1640	NaN	NaN	0.855905	0.909469	0.936296	0.000687841	0.900557
proteophosphoglycan PPG1	KQsGASHAVEAAEETSEGR	TGGT1_297520;S1235	NaN	NaN	0.956474	0.943326	0.802337	0.00298655	0.900712
AMP-binding enzyme domain-containing protein	QFVADVNsAVALR	TGGT1_310150;S843	NaN	NaN	0.83814	0.893352	0.970864	0.00182119	0.900785
formate/nitrite transporter protein	GAsVNsLAVSAIPSVFSAPR	TGGT1_209800;S296;;S299	NaN	NaN	0.874265	0.84657	0.981687	0.00208578	0.900841
dense granule protein GRA12	ADEsHEGQTK	TGGT1_288650;S415	0.71095	NaN	0.979167	0.984174	0.929371	0.000795272	0.900915
helicase associated domain (ha2) protein	LTVQPPDVSALDsAR	TGGT1_318440;S905	NaN	NaN	0.81851	0.79918	1.08537	0.0103411	0.90102
RNA recognition motif-containing protein	HVsDGGTNCER	TGGT1_320100;S656	0.869907	NaN	0.855217	0.952786	0.927178	3.72718e-05	0.901272
hypothetical protein	RSLLHtQVSADAAK	TGGT1_250820T1060	NaN	NaN	0.858802	0.778761	1.06709	0.00896356	0.901551
hypothetical protein	HEGEKtPPAR	TGGT1_245560T321	NaN	NaN	0.893432	1.04739	0.763889	0.00815944	0.90157
putative P-type ATPase4	ESTVGGSGTGHsQLGK	TGGT1_278660;S93	NaN	1.24092	0.769764	0.776175	0.819665	0.00417507	0.901631
Sin3-associated polypeptide SAP18	ASAsPRPGSEGAENALQK	TGGT1_201400;S81	0.953831	NaN	0.874405	0.882214	0.896419	1.73971e-05	0.901717
TLD protein	KIDEDRDsVPGSTSAR	TGGT1_237280;S858	NaN	NaN	1.00056	0.87038	0.834659	0.00311004	0.901866
hypothetical protein	LAsLSESLPK	TGGT1_291180;S2616	NaN	0.920945	0.978349	0.858138	0.850279	8.06881e-05	0.901928
SWIRM domain-containing protein	ATVDLLGDEEtPARGER	TGGT1_286920T598	NaN	NaN	0.996316	0.857362	0.852142	0.00272879	0.90194
hypothetical protein	ADsRENGADWSTPASK	TGGT1_236560;S1671	NaN	NaN	0.907241	0.890402	0.908584	4.20486e-05	0.902076
hypothetical protein	EAELISLSPGGHDRSSsR	TGGT1_267740;S197	NaN	NaN	0.874251	1.11996	0.712233	0.0168263	0.902148
histone H3.3	sTDLLIR	TGGT1_218260;S58	NaN	NaN	0.847836	0.836246	1.02274	0.00444048	0.902274
metal cation transporter, ZIP family protein	GSGAsISCSR	TGGT1_261720;S140	NaN	NaN	0.906565	0.860402	0.940196	0.000656298	0.902388
alveolin domain containing intermediate filament IMC10	QEAVDYTAHFQQLHQQGtPSHK	TGGT1_230210T402	NaN	0.834098	0.839216	0.888549	1.04773	0.000370475	0.902398
dense granule protein GRA8	FtVTTQN	TGGT1_254720T262	NaN	NaN	1.02716	0.885728	0.795382	0.0055358	0.902757
CRAL/TRIO domain-containing protein	LSKPAEAMQGAEDNAQNsEEEKPQAHAER	TGGT1_254390;S604	NaN	0.932465	0.938296	0.979991	0.760804	0.000338911	0.902889
hypothetical protein	SAYAVSAPEGDSNEsSDEESLK	TGGT1_267740;S85	0.594478	NaN	1.1018	1.03545	0.879843	0.00407403	0.902893
protein disulfide-isomerase domain-containing protein	MKAsGGPPGSK	TGGT1_238040A;S8	NaN	NaN	0.997204	0.842462	0.86911	0.0027865	0.902925
zinc finger (CCCH type) motif-containing protein	TSQAtPPEAAAR	TGGT1_202900T848	NaN	NaN	0.720095	0.841554	1.14776	0.0192765	0.903136
transporter, major facilitator family protein	EEAPGPSPALVPSAEFAEELQTSGsFDREK	TGGT1_253130;S57	NaN	NaN	0.792788	1.26384	0.653369	0.0393515	0.903332
zinc finger (CCCH type) motif-containing protein	TPsCESPTAR	TGGT1_202900;S1034	0.767469	NaN	0.799842	0.808381	1.23773	0.00396135	0.903356
hypothetical protein	ENAsLEENLLTFGTVELR	TGGT1_230940;S577	NaN	NaN	0.953813	0.894869	0.861521	0.00089084	0.903401
RNA pseudouridine synthase superfamily protein	SsPVIVSSEK	TGGT1_306660;S5144	NaN	NaN	0.977778	0.837286	0.895639	0.00202772	0.903568
hypothetical protein	SSsPPSGPR	TGGT1_247520;S132	0.630668	1.18897	0.730222	0.653046	1.31518	0.00334288	0.903617
putative transcription elongation factor 1	KREEssEDEGsDHVSGR	TGGT1_297730;S174; ;S175; ;S180	0.776026	NaN	1.00828	1.07384	0.756598	0.00151719	0.903686
hypothetical protein	LLDPLLSsGEYDVK	TGGT1_232080;S3110	NaN	NaN	0.84749	0.821218	1.04249	0.00591108	0.903733
hypothetical protein	GRsFsGASTGPQK	TGGT1_306400;S895;;S897	0.873868	NaN	0.868462	0.850378	1.02318	0.000190468	0.903972
GYF domain-containing protein	GTsEGAAASGGSLVEGPGVR	TGGT1_298610;S278	NaN	NaN	1.01257	0.856084	0.843399	0.00360152	0.904018
SNARE associated Golgi protein	AsQGLLQR	TGGT1_248870;S104	NaN	NaN	0.864934	0.824605	1.02268	0.00443892	0.904073
hypothetical protein	KQsNDADGEGEVDTGVAGR	TGGT1_236890;S72	NaN	0.421231	0.98448	0.980789	1.22996	0.0132395	0.904115
hypothetical protein	SIPEEGTKPEAEItPK	TGGT1_221390T695	NaN	NaN	1.23126	0.892773	0.588448	0.0396686	0.90416
eIF2 kinase IF2K-D (incomplete catalytic triad)	GsPEEGREK	TGGT1_319610;S295	NaN	NaN	0.930012	0.919214	0.863475	0.000519425	0.904234
transcription elongation factor SPT6	HAsLEGEAEASLK	TGGT1_308890;S843	NaN	NaN	0.968704	0.973066	0.771303	0.0053699	0.904358
WD domain, G-beta repeat-containing protein	AKsAEEVESEK	TGGT1_311400;S775	NaN	NaN	0.955649	0.942696	0.814763	0.00246226	0.904369
hypothetical protein	LDVGEERPDLsPLRR	TGGT1_264130;S269	0.703963	0.581982	0.995753	1.06195	1.17836	0.00129199	0.904402
hypothetical protein	ELLVELSAQEKPGEsN	TGGT1_213030;S323	NaN	NaN	0.731183	0.877832	1.10424	0.014091	0.904418
hypothetical protein	GENATAsEEEKEGGR	TGGT1_271290;S595	NaN	NaN	0.994203	0.967033	0.752099	0.00709216	0.904445
hypothetical protein	KGEEsGsEGPSVSPSHGVR	TGGT1_309250;S1791; ;S1793	NaN	NaN	0.939591	1.12036	0.65354	0.0218371	0.904497
hypothetical protein	GEAGEsEADsNRGGGADGNEVKDNAIR	TGGT1_228770;S346;;S350	0.906977	NaN	0.935946	0.908652	0.866535	8.70439e-06	0.904527
TB2/DP1, HVA22 family protein	GNAPSsMGAEECPSIQVAGFDLQR	TGGT1_257040;S11	NaN	NaN	0.801584	1.01117	0.901057	0.00444728	0.904604
RNA recognition motif-containing protein	STSLtPERRPLEKPR	TGGT1_209850T17	NaN	NaN	1.02547	0.903444	0.785165	0.00582864	0.904693
hypothetical protein	RQPEQHEEDEEESEDMGsEEEQESN	TGGT1_206320;S287	NaN	NaN	0.809914	0.74274	1.16188	0.0200152	0.904845
hypothetical protein	RDsGDSGALK	TGGT1_279320;S4010	0.999003	NaN	0.992326	0.89168	0.736483	0.000673256	0.904873
hypothetical protein	TLLDAGsDPGAAAEK	TGGT1_229750;S355	NaN	NaN	1.0061	0.941057	0.767502	0.00613632	0.904886
putative myosin heavy chain	VASEASDtPGRGTSANVDHLQGR	TGGT1_208370T1024	1.22861	1.03909	0.712963	0.76412	0.779725	0.00078807	0.904901
hypothetical protein	ETSEAAEAGEVGEGsPPKR	TGGT1_287180;S1071	NaN	0.537016	1.02741	1.09563	0.959932	0.00552906	0.904997
hypothetical protein	KAsDESFHR	TGGT1_279320;S3984	NaN	NaN	0.952184	0.951858	0.810995	0.00268717	0.905012
hypothetical protein	GAEAQLCEsPPSSGSR	TGGT1_275490;S384	NaN	NaN	0.934746	0.945699	0.834631	0.00152122	0.905025
hypothetical protein	GLtDDEATLVGVEGGLGsPR	TGGT1_232080T2722;;S2737	NaN	NaN	0.837838	0.922397	0.955231	0.00148908	0.905155
Tyrosine kinase-like (TKL) protein	RLsPTEKDDR	TGGT1_301270;S3298	NaN	NaN	1.04847	1.00449	0.662682	0.0176638	0.905214
hypothetical protein	KLsPVTVHISK	TGGT1_234230;S4221	NaN	NaN	0.940978	0.950212	0.825095	0.00197082	0.905428
hypothetical protein	ADDREEEERsLGAR	TGGT1_309960A;S356	NaN	NaN	0.792507	0.934498	0.989526	0.00417492	0.90551
dense granule protein GRA7	sDAEVtDDNIYEEHtDRK	TGGT1_203310;S107;T112;T121	0.997378	NaN	0.89218	0.924469	0.808298	0.000177493	0.905581
regulator of chromosome condensation RCC1	AVSEEAAGAPSGCDsDVEDVTVDLQGSEEAAK	TGGT1_213900;S942	NaN	NaN	0.885637	0.929953	0.901186	0.000205415	0.905592
hypothetical protein	SsDDLLELLEQDDTEEGR	TGGT1_311480;S313	NaN	0.986515	0.807492	0.794397	1.03397	0.000671218	0.905594
hypothetical protein	LNPVIQTsLSKELLYETTsPR	TGGT1_250820;S1105; ;S1116	NaN	NaN	1.0067	0.84115	0.86901	0.00317808	0.90562
dense granule protein GRA3	RQPFMsSVK	TGGT1_227280;S197	NaN	0.711625	1.06985	1.03597	0.805214	0.00191788	0.905665
hypothetical protein	LADAGEEGEGVERsGGEATGEEGVLVLPVR	TGGT1_213040;S1542	NaN	NaN	1.11538	0.839863	0.761848	0.0137301	0.905697
hypothetical protein	RRESPEEEsR	TGGT1_275990;S83	NaN	NaN	0.897474	0.870057	0.95016	0.000672501	0.905897
regulator of chromosome condensation (RCC1) repeat-containing protein	AETDDELRLsDLER	TGGT1_313860;S1488	NaN	NaN	0.87275	0.937018	0.908224	0.000420573	0.905997
ATPase, AAA family protein	SVStPEDPVLSQGAVRPGGSK	TGGT1_235170T33	NaN	NaN	1.00565	0.789916	0.922449	0.00477289	0.906005
hypothetical protein	RFssGAFLSEAR	TGGT1_311230;S3909;;S3910	NaN	NaN	0.773355	0.787544	1.15726	0.0187	0.906053
CPSF A subunit region protein	RRsEDVPEESR	TGGT1_267710;S113	1.18253	NaN	0.883598	0.876438	0.681672	0.00312556	0.90606
hypothetical protein	VDKGEPGGPGEsEEPREEER	TGGT1_212220;S703	NaN	NaN	1.05399	0.857591	0.806695	0.00685255	0.906092
hypothetical protein	RATCEIYALEDEVQsDGASPALEGAAR	TGGT1_239400;S918	NaN	1.13094	0.88773	0.842531	0.763214	0.00143526	0.906103
HCNGP family protein	ASDPADDsDSGVLPK	TGGT1_217440;S96	NaN	NaN	0.910764	1.002	0.805651	0.00389642	0.906138
AP2 domain transcription factor AP2XII-8	KDAEGsQGGEESREDILK	TGGT1_250800;S1544	NaN	NaN	0.864691	0.924104	0.929699	0.000526446	0.906165
metal cation transporter, ZIP family protein	QVsADRRsDLVPYESGSHGR	TGGT1_261720;S148;;S153	NaN	NaN	0.745469	0.797072	1.17596	0.0217034	0.906167
HECT-domain (ubiquitin-transferase) domain-containing protein	RAsEEDDVEK	TGGT1_295710;S2166	1.03391	0.6138	1.08322	0.864734	0.935938	0.000388042	0.906321
hypothetical protein	SFSSEsGR	TGGT1_229640;S795	1.03273	NaN	0.868744	0.885609	0.838235	0.00023784	0.906329
Sjogren's syndrome/scleroderma autoantigen 1 (Autoantigen p27) protein	HsPAHGK	TGGT1_212260;S94	NaN	NaN	0.777427	0.796533	1.14505	0.0169393	0.906337
hypothetical protein	EALPAsPR	TGGT1_306020;S411	NaN	0.88165	0.901869	0.852785	0.989242	7.49574e-05	0.906386
hypothetical protein	DPQHEAPTsGEMR	TGGT1_306020;S7705	NaN	NaN	0.90514	0.744474	1.07016	0.0105848	0.906591
putative phosphatidylinositol synthase	SVQAAsDSDLSHEQK	TGGT1_207710;S33	NaN	0.719901	0.863148	0.935844	1.10762	0.00150798	0.906628
GNS1/SUR4 family protein	ACEssREDLEEEEPEVGPNRPR	TGGT1_253880;S465;;S466	NaN	NaN	0.813444	0.868669	1.03788	0.00549969	0.906664
DHHC zinc finger domain-containing protein	ERDDTGGTLHEsDEDER	TGGT1_217870;S358	NaN	NaN	0.857336	0.957468	0.90573	0.00101484	0.906845
hypothetical protein	VTFSVLsGQGGRPsPR	TGGT1_221390;S604;;S611	NaN	NaN	0.929539	1.05007	0.740975	0.00969453	0.906861
hypothetical protein	EGHASssADEGSQSSLK	TGGT1_248740;S646;;S647	0.906983	NaN	0.823794	0.855837	1.0411	0.000321512	0.906928
PLU-1 family protein	GTEQSGTPsPGNSGADAEIAR	TGGT1_253750;S7391	NaN	NaN	1.00465	0.911591	0.804889	0.00402375	0.907043
hypothetical protein	YPEsADGSRPSR	TGGT1_212960B;S205	NaN	NaN	0.916027	0.967359	0.837825	0.00171937	0.90707
putative U2 small nuclear ribonucleoprotein family protein	ALsPERADPFSDGDLGAASR	TGGT1_205010;S118	NaN	1.13998	0.885363	0.944223	0.658723	0.00275428	0.907072
surface antigen repeat-containing protein	LDGFRDEPsPLGTHR	TGGT1_213392;S780	NaN	NaN	0.960638	0.962833	0.797916	0.00360459	0.907129
hypothetical protein	GPGDPLGsPTGGGDSSGK	TGGT1_233160;S1427	NaN	NaN	0.869452	0.972562	0.87963	0.00130504	0.907215
hypothetical protein	sPSASPER	TGGT1_220570;S605	NaN	NaN	0.908796	0.958693	0.854523	0.00109725	0.907337
Ser/Thr phosphatase family protein	RAPDAStPPGQSAADETPR	TGGT1_269460T805	NaN	NaN	1.02372	0.895005	0.803427	0.00492173	0.907384
alveolin domain containing intermediate filament IMC12	VSEAENDNAsERAEsVDSMPQ	TGGT1_248700;S266;;S271	NaN	NaN	0.883436	0.941001	0.897865	0.000362958	0.907434
hypothetical protein	DDTANVAHLDsLDALIQQLR	TGGT1_309050;S738	NaN	NaN	1.02588	0.918919	0.777595	0.00621954	0.907465
hypothetical protein	KFTsFGGGSGSR	TGGT1_313480;S6	NaN	NaN	0.675869	0.955734	1.09091	0.0176574	0.907504
putative cyclophilin	QGGEsGDEDAEESRR	TGGT1_229940;S428	NaN	NaN	0.834606	0.908082	0.979837	0.0021275	0.907508
surp module domain-containing protein	KAPsPPVAPAPPAK	TGGT1_246500;S551	NaN	0.922726	0.900148	0.81076	0.996459	0.000164087	0.907523
rhoptry protein ROP7	GSDDAAEVsRR	TGGT1_295110;S135	0.630996	NaN	0.895064	0.915131	1.18902	0.00413342	0.907553
hypothetical protein	RsATREEER	TGGT1_247450;S448	NaN	NaN	0.864396	0.811218	1.04723	0.00614463	0.907615
RNA recognition motif-containing protein	NSsPGEPGDDFR	TGGT1_208970;S116	NaN	NaN	0.930627	0.967806	0.82445	0.00223194	0.907628
RNA recognition motif-containing protein	GPsGESGLAYGRPRPR	TGGT1_294710;S831	NaN	NaN	0.813518	0.883058	1.02676	0.00474971	0.907779
hypothetical protein	RGEsDEGAGSRDPHADGAR	TGGT1_268780;S4306	NaN	NaN	0.923248	0.866034	0.934057	0.000540068	0.90778
PHD-finger domain-containing protein	AFEEEALNLPsPSRSEVDAAR	TGGT1_224260;S5172	1.02792	NaN	0.80422	0.884449	0.915381	0.000290279	0.907992
hypothetical protein	APsAGLSGVADGTR	TGGT1_270930;S2010	NaN	0.993713	0.800571	0.862828	0.974965	0.000284437	0.908019
hypothetical protein	ALEDLsPK	TGGT1_212220;S272	NaN	0.8587	1.16567	0.944469	0.663366	0.0031704	0.908051
hypothetical protein	SHASNILAHSsSSGR	TGGT1_311210;S395	NaN	NaN	0.941799	0.869015	0.913651	0.000543979	0.908155
hypothetical protein	SKDLEQGsTGPDYNVYYPR	TGGT1_202620;S66	NaN	0.81886	0.934468	0.73819	1.14111	0.00190686	0.908157
putative U5 snRNP-associated subunit	TPLLGSGSGTGSSGAGtPSLNDLGEAR	TGGT1_205220T303	NaN	NaN	0.851975	0.842174	1.03043	0.0045079	0.908193
hypothetical protein	AGALRPGAAGAEsPR	TGGT1_289520;S2493	NaN	NaN	0.934641	0.91996	0.870017	0.000463479	0.908206
hypothetical protein	GLtEGQGVASRETLIVDTSAR	TGGT1_311220T1188	NaN	NaN	0.823171	0.828074	1.07366	0.00818654	0.908302
cytochrome p450 superfamily protein	QGLHAVASSGHLALtPK	TGGT1_315770T257	NaN	NaN	0.717787	0.988884	1.01828	0.0109062	0.908317
hypothetical protein	REsETQADATSK	TGGT1_229470;S287	NaN	NaN	1.06653	0.968481	0.689947	0.0150729	0.908319
hypothetical protein	DGsPLASR	TGGT1_304520;S439	0.658114	NaN	1.01578	1.27006	0.690154	0.00821942	0.908527
RNA recognition motif-containing protein	FETGPGGRPPEEGGMDSGsPPAFHR	TGGT1_270880;S737	NaN	0.954742	1.05955	0.892086	0.727763	0.000964967	0.908535
hypothetical protein	AQLPTPVSLVSsLPK	TGGT1_234270;S1282	NaN	NaN	0.912784	0.993251	0.819725	0.00303109	0.908587
DEAD/DEAH box helicase domain-containing protein	HSSSRPPsER	TGGT1_221660;S63	1.03185	NaN	0.797455	1.01737	0.788054	0.00086793	0.908683
apical complex lysine methyltransferase	QHGVLDHTDsIK	TGGT1_216080;S57	NaN	NaN	0.946681	0.892381	0.886988	0.000439794	0.908683
PWI domain-containing protein	GLSGSDAGsESR	TGGT1_270770;S288	1.08651	NaN	0.831183	0.850715	0.866629	0.00061544	0.90876
hypothetical protein	AVsSSSLGDWFSYFGPR	TGGT1_224000;S713	NaN	NaN	0.9475	0.952381	0.826457	0.00204754	0.908779
putative myosin light chain 2	VGtPGICTVVLIDK	TGGT1_297470T13	NaN	NaN	0.829526	0.914035	0.982854	0.00237184	0.908805
hypothetical protein	DEAASHEDAQsQETAQGDNQGVHER	TGGT1_286580;S666	1.04335	0.904559	0.869845	0.927727	0.798564	2.24342e-05	0.908808
membrane protein FtsH1	IRsNPVLPEK	TGGT1_259260;S227	NaN	0.874942	0.910221	0.931382	0.91956	5.27333e-06	0.909026
hypothetical protein	ETPEEEHQKDQtEDEAGGLR	TGGT1_242700T754	NaN	NaN	1.03825	0.721759	0.967236	0.0109412	0.909082
hypothetical protein	GSHLAAAGsEELTLGR	TGGT1_306400;S700	NaN	NaN	0.954428	0.909824	0.863182	0.000838506	0.909145
ABC transporter transmembrane region domain-containing protein	LPsDQAGGPPPGVSHAR	TGGT1_305590;S1427	NaN	NaN	0.993015	0.874379	0.860054	0.00214114	0.909149
hypothetical protein	SVtSEsNELSIR	TGGT1_272520T43;;S46	NaN	NaN	0.833062	1.01184	0.882585	0.00341832	0.909162
hypothetical protein	WPsRDREER	TGGT1_247450;S30	NaN	0.996014	0.906502	0.863088	0.87115	8.24194e-05	0.909188
hypothetical protein	EPTQTEQVsDAPsEDPERAR	TGGT1_226580;S24;;S28	0.823726	NaN	0.898901	0.969822	0.944807	9.64643e-05	0.909314
hypothetical protein	LFsPEGSFVMAPEVTPETPVR	TGGT1_315750;S42	NaN	1.22161	0.782302	0.756612	0.876993	0.00344411	0.909381
hypothetical protein	GRAEQDSsPQTR	TGGT1_259040;S168	NaN	1.09521	0.832155	0.830992	0.879771	0.000717987	0.909533
ccr4-associated factor family protein	sSDSLGR	TGGT1_260240;S283	NaN	1.2608	0.6367	0.852639	0.888136	0.00594032	0.909568
hypothetical protein	RsDSEIPSLR	TGGT1_257430;S1516	NaN	NaN	0.917954	0.997622	0.813256	0.00342683	0.909611
Ser/Thr phosphatase family protein	RHsLEGASPAFQDLQSACR	TGGT1_269460;S78	NaN	NaN	0.937076	0.800185	0.991885	0.00390359	0.909715
tetratricopeptide repeat-containing protein	AAVSEENLESSLCQEsQDESEPK	TGGT1_247000;S403	0.85775	NaN	1.1101	1.08621	0.585192	0.00502063	0.909813
BING4CT (NUC141) domain-containing protein	ATSsPSTSTSFQR	TGGT1_268640;S55	NaN	NaN	0.870613	0.918494	0.940793	0.000517225	0.909967
hypothetical protein	KTDASQSAsPSDPSHK	TGGT1_217480;S451	NaN	NaN	0.938317	0.859972	0.931862	0.000760347	0.91005
hypothetical protein	RYADsPGHR	TGGT1_306400;S928	1.08564	0.68448	1.00829	0.934509	0.837727	0.000198678	0.910129
hypothetical protein	GGLSPRsPR	TGGT1_209108;S219	NaN	NaN	0.917614	0.819322	0.994112	0.00307379	0.910349
ribonuclease HI protein	EALSWVEASFSsETEVDGGDKR	TGGT1_220450;S206	NaN	NaN	0.986532	1.04525	0.699386	0.013498	0.910389
hypothetical protein	SHEHDDAsDSLMPADR	TGGT1_252340;S1154	NaN	1.07778	0.789797	0.613247	1.16098	0.00559543	0.910452
nuclear factor NF4	DPsVSPAVTDAAPGEAEGVAAAK	TGGT1_205580;S347	NaN	NaN	0.873398	0.890267	0.967727	0.00101598	0.910464
hypothetical protein	GNDEEAEVADAEGsDR	TGGT1_306020;S8693	NaN	NaN	0.920093	0.914235	0.8971	5.74029e-05	0.910476
hypothetical protein	AAGRDsRDDDIPQR	TGGT1_247450;S637	NaN	0.873107	0.947988	0.878166	0.943018	2.41072e-05	0.91057
protein phosphatase 2C domain-containing protein	SPsAEGPTGASASASGLLGSSALAVGPDEK	TGGT1_267100;S121	NaN	NaN	0.781581	1.11085	0.839602	0.0121903	0.910678
RNA recognition motif-containing protein	LGsNPNFIPMGGASGPPR	TGGT1_209850;S308	NaN	NaN	0.846067	1.12479	0.762099	0.0141715	0.910985
hypothetical protein	EGGVGEVPsPR	TGGT1_255300;S1346	NaN	NaN	1.01217	0.966186	0.754615	0.00749354	0.91099
rhoptry protein ROP13	SALTPsAPDPDGDGDPATSLPSQR	TGGT1_312270;S120	NaN	NaN	0.929262	0.975852	0.828025	0.00228612	0.911046
hypothetical protein	SRsPPQGGSR	TGGT1_247450;S903	NaN	NaN	0.850155	0.719542	1.16376	0.020293	0.911152
rhoptry neck protein RON5	AAQtDAQPLPK	TGGT1_311470T1310	NaN	NaN	0.965547	0.982051	0.785999	0.00471359	0.911199
facilitative glucose transporter GT1	REAEsLWDIPPESYASK	TGGT1_214320;S17	NaN	1.01434	0.830225	0.893913	0.906328	0.000161559	0.911202
GAP45 protein	LAsPEDsASETTMATQPQK	TGGT1_223940;S163;;S167	0.990451	NaN	0.83245	0.896819	0.925154	0.000102065	0.911218
hypothetical protein	AARLsSsPsAHRPSSPR	TGGT1_238510;S110; ;S112; ;S114	NaN	NaN	0.860376	0.769018	1.10445	0.0118566	0.911281
hypothetical protein	EAELISLsPGGHDR	TGGT1_267740;S188	NaN	NaN	0.890719	0.855755	0.987375	0.00186053	0.911283
hypothetical protein	ERFPsSSDR	TGGT1_240060;S551	NaN	NaN	1.05409	0.842488	0.837478	0.00607926	0.911352
NAD dependent epimerase/dehydratase family protein	RSsQGMAFSR	TGGT1_246080;S76	NaN	NaN	0.953456	0.803712	0.977029	0.00352719	0.911399
RNA recognition motif-containing protein	GLsPAVR	TGGT1_283878;S639	NaN	NaN	1.03983	0.940563	0.753846	0.00835472	0.911413
dual specificity phosphatase, catalytic domain-containing protein	SsPKGEDLGSSTR	TGGT1_268770;S203	NaN	NaN	1.27314	0.838235	0.623034	0.0413006	0.91147
hypothetical protein	TSAPSGSsSELAAVTVTPPQDSA	TGGT1_240810;S551	NaN	NaN	0.898649	0.905807	0.93003	0.000108493	0.911495
hypothetical protein	AGLAGsDRGEK	TGGT1_258070;S295	NaN	NaN	0.968153	0.954265	0.812087	0.00297987	0.911502
dense granule protein GRA14	EPPPPYsPPMYPFADPEHR	TGGT1_239740;S356	1.30931	0.576839	0.745673	0.865807	1.05997	0.00198754	0.91152
hypothetical protein	RAGsADKEPQHTGGTEDR	TGGT1_219600;S279	NaN	NaN	0.912672	0.982768	0.839167	0.00206216	0.911536
FYVE zinc finger domain-containing protein	KKLsPVPSDMSENENPR	TGGT1_237870;S88	NaN	NaN	0.847555	0.862546	1.02457	0.00384291	0.911557
hypothetical protein	SVEEsDSGPSPSSR	TGGT1_259650;S285	NaN	NaN	0.946118	0.817257	0.971319	0.00272832	0.911565
hypothetical protein	QGLDVSASKPPPSPASGGKPVEAPLHSTPATGsPSETVR	TGGT1_220240;S234	NaN	NaN	0.769758	0.991559	0.973695	0.00603461	0.911671
hypothetical protein	ALSPARPATSQAPsEGETNELR	TGGT1_261960;S836	NaN	NaN	1.03326	0.840223	0.861588	0.00446098	0.91169
hypothetical protein	QRNsPEVEGYAPR	TGGT1_201140;S97	0.97707	0.803186	1.04811	0.958286	0.771882	6.74679e-05	0.911707
dense granule protein GRA5	AAVtGHPVR	TGGT1_286450T69	NaN	NaN	1.05759	0.97843	0.699493	0.0138909	0.911838
hypothetical protein	KDGGGsPR	TGGT1_244460;S84	NaN	NaN	0.925905	0.937778	0.871863	0.000494493	0.911849
hypothetical protein	SQKEDsTAAK	TGGT1_272520;S314	NaN	NaN	0.912866	0.970401	0.85264	0.00138686	0.911969
hypothetical protein	VENESsPK	TGGT1_230940;S408	NaN	0.755283	1.19334	0.989437	0.709989	0.00387247	0.912012
hypothetical protein	AVDQGTAADEQVDQAPsVLAEER	TGGT1_219170;S24	0.800628	1.18417	0.864116	0.848379	0.863118	0.000189209	0.912083
hypothetical protein	AAPAIATIGsREsFRR	TGGT1_262935;S192;;S195	NaN	NaN	0.84136	1.01623	0.879092	0.00337496	0.912227
hypothetical protein	LDDFGDLsDSCDKVKEER	TGGT1_289880;S251	NaN	1.24799	0.929688	0.703586	0.767662	0.00490881	0.912233
putative autophagy-related 12 variant 1	AVCGEETTsEKAEK	TGGT1_321300;S193	NaN	NaN	1.03807	0.989819	0.709297	0.0123866	0.912395
HECT-domain (ubiquitin-transferase) domain-containing protein	TTTQEDALsPR	TGGT1_295710;S7641	1.16535	0.672662	1.01835	0.920894	0.784896	0.000453169	0.91243
transducin beta-like protein TBL1	EQEKVETAAGEDsPTAPK	TGGT1_309140;S559	NaN	0.801624	1.0542	0.882817	0.911132	0.000418498	0.912443
transporter, major facilitator family protein	LSsKGLTAR	TGGT1_226020;S43	NaN	NaN	0.858041	0.724684	1.15482	0.0188598	0.912515
hypothetical protein	ASsPLPVPK	TGGT1_287480;S303	NaN	NaN	1.09615	0.954728	0.6867	0.0168753	0.912526
hypothetical protein	GAVtPPSFSPASLYNR	TGGT1_228150T332	NaN	NaN	0.946779	0.972603	0.818433	0.00271767	0.912605
myosin C	RPsHVCMEEAYHVWR	TGGT1_255190;S933	NaN	1.46106	0.759111	0.716161	0.71415	0.0155275	0.91262
DEAD-family helicase	VRsDGKDEDR	TGGT1_298020;S358	NaN	NaN	1.06533	0.934224	0.738417	0.010659	0.912657
hypothetical protein	SSEARPVsPLAVSLEVK	TGGT1_227000;S832	NaN	NaN	1.02477	0.974843	0.738902	0.00919763	0.912838
hypothetical protein	VLsLQLEK	TGGT1_309190;S694	NaN	NaN	0.86052	0.855901	1.02229	0.00357225	0.912904
hypothetical protein	GSPSLQHFSTTVtSSSPR	TGGT1_235340T61	NaN	NaN	0.871265	0.859272	1.00821	0.00272722	0.912916
hypothetical protein	LLVEAEtPTDR	TGGT1_297180T33	NaN	NaN	0.972021	0.896616	0.870394	0.00111124	0.91301
GAP45 protein	VAEHSSAAVTDRSVVGyTVTPCDMAAIDETAK	TGGT1_223940Y196	NaN	NaN	0.922951	0.835237	0.981525	0.00215956	0.913238
hypothetical protein	GRPsDNTQVGLR	TGGT1_261430;S1047	NaN	NaN	0.859779	0.71558	1.16474	0.0203732	0.913366
RNA helicase (UPF2 interacting domain) protein	GLGESLGPANASGAsDPDFVGR	TGGT1_291820;S1499	NaN	NaN	0.943753	0.952756	0.844935	0.00142542	0.913815
hypothetical protein	GQANRDDsRGDEK	TGGT1_241170;S281	NaN	NaN	0.904021	0.942523	0.894975	0.000254366	0.91384
putative preprotein translocase Sec61	DSsLVQVLNR	TGGT1_269980;S409	NaN	NaN	0.866845	1.03958	0.83513	0.00479773	0.913852
Sec61beta family protein	VTAGGGASsAAGQR	TGGT1_211040;S37	0.583458	0.765534	1.07612	1.16239	0.982993	0.000988374	0.914099
hypothetical protein	SRsPLHK	TGGT1_209280;S597	NaN	NaN	0.915736	0.822179	1.00443	0.00329692	0.914115
hypothetical protein	DTsEALSR	TGGT1_262935;S470	NaN	NaN	0.892823	1.00885	0.840681	0.002943	0.914118
ATP-binding cassette G family transporter ABCG96	DLLTVPLQQLVVGEsQQER	TGGT1_288920;S251	NaN	NaN	0.914689	1.18658	0.64143	0.0283753	0.914233
hypothetical protein	ILRPRsPPGPTGGR	TGGT1_247450;S690	NaN	1.09354	0.901548	0.721351	0.940965	0.00125983	0.914352
hypothetical protein	EQASAsPASANEAEK	TGGT1_204120;S416	NaN	NaN	0.879336	0.875142	0.989017	0.00165761	0.914498
RNA recognition motif-containing protein	ELHAASFPVEYDGEDDsPYLQPSER	TGGT1_304760;S60	NaN	NaN	0.900151	0.774929	1.06906	0.00856845	0.914713
bromodomain-containing protein	AHGAVGPVAVAGVSPYPPAVGDGAPsDVGK	TGGT1_264640;S992	NaN	NaN	0.988775	1.02991	0.725579	0.0106868	0.914755
hypothetical protein	KEsDPQPTVSWAAVPCQ	TGGT1_201760;S322	NaN	NaN	0.851138	0.988723	0.904744	0.00190984	0.914868
hypothetical protein	VTEGNsPEGsEEEPRK	TGGT1_271990;S1040;;S1044	NaN	NaN	0.84303	0.870968	1.03089	0.00406609	0.914963
hypothetical protein	VSFDsTDTR	TGGT1_309910;S1389	NaN	NaN	1.25	0.803698	0.6913	0.0330544	0.914999
RNA recognition motif 2 protein	ECEVVDVDsGR	TGGT1_313910;S189	NaN	NaN	0.898201	0.971907	0.874929	0.00101891	0.915012
hypothetical protein	QKPSSSGALsPVSR	TGGT1_211700;S1305	NaN	NaN	1.09791	0.98164	0.66557	0.0193511	0.91504
GYF domain-containing protein	RAELsPR	TGGT1_298610;S1041	NaN	NaN	0.914626	1.02779	0.802779	0.00500103	0.915065
hypothetical protein	RGAsPGRGEEAR	TGGT1_247450;S664	0.994719	NaN	0.809907	0.983715	0.872177	0.00025447	0.91513
poly(ADP-ribose) polymerase catalytic domain-containing protein	GHVKYDsEAEDDIPK	TGGT1_270840;S271	NaN	1.10723	0.88538	0.863561	0.804469	0.00082168	0.91516
hypothetical protein	SARLsEEREEDTLVPALTEEELR	TGGT1_310570;S67	NaN	NaN	1.21618	0.859246	0.670082	0.0292691	0.915169
putative vacuolar ATP synthase subunit d	SLAEVAsIVSETDIELMR	TGGT1_259010;S192	NaN	NaN	0.853933	0.811855	1.07977	0.00816048	0.915186
DnaJ domain-containing protein	SSPGPAGsPGEEAR	TGGT1_232050;S112	NaN	NaN	0.932482	0.835206	0.977876	0.00210777	0.915188
hypothetical protein	SATsFHSSEEDR	TGGT1_217680;S641	NaN	NaN	1.0715	0.976594	0.697602	0.014701	0.915232
corepressor complex CRC230	RsPTPPVTHSSSGAPIWTGER	TGGT1_305340;S1759	NaN	NaN	0.882851	0.980507	0.882353	0.00126906	0.915237
hypothetical protein	SLLsSAVPQSLHLQLR	TGGT1_203240;S623	NaN	NaN	0.883761	0.878272	0.983732	0.00139946	0.915255
hypothetical protein	AGPSGLPPPsPK	TGGT1_273320;S231	NaN	NaN	0.927658	0.92082	0.897541	9.91619e-05	0.91534
hypothetical protein	LFEGQELPGPLPSLSPLPDsPR	TGGT1_289120;S58	NaN	NaN	0.898259	0.784221	1.06382	0.00777034	0.915433
hypothetical protein	KQsLEGERR	TGGT1_235490;S209	NaN	NaN	0.909871	0.88344	0.953488	0.000497167	0.9156
hypothetical protein	LSGSDVLsPR	TGGT1_240220;S1148	0.929927	NaN	0.959337	0.884049	0.889253	1.62159e-05	0.915641
dense granule protein GRA1	VERPtGNPDLLK	TGGT1_270250T74	NaN	NaN	1.00354	0.91426	0.829184	0.00300846	0.915661
peptidase M16 inactive domain-containing protein	AEISALQASLsSEKLDFLEK	TGGT1_227948;S728	NaN	NaN	0.970434	0.942308	0.834353	0.00204521	0.915698
hypothetical protein	YEDTVEGLCLGSVTSHSGEsAHENSEAR	TGGT1_286580;S647	NaN	NaN	0.7689	1.00482	0.973531	0.00646297	0.91575
putative CMGC kinase	DCsQCQQK	TGGT1_250850;S1509	NaN	NaN	1.09013	1.12296	0.534315	0.040842	0.915802
GYF domain-containing protein	KKGtDEGDWEMIR	TGGT1_298610T831	NaN	NaN	0.971542	0.770229	1.00588	0.00637837	0.915884
myosin H	KySAVELGDYLVGSPVFIR	TGGT1_243250Y19	NaN	NaN	0.992701	0.977006	0.777953	0.00564647	0.915887
MIF4G domain-containing protein	GSTsHGYAER	TGGT1_269180;S1221	NaN	NaN	0.872074	0.96717	0.909586	0.000909702	0.916277
FUSE-binding protein 2 / KH-type splicing regulatory protein	AGHAGNGSAsPSGAK	TGGT1_216670;S276	NaN	NaN	0.757905	0.984421	1.00657	0.0074353	0.916299
hypothetical protein	KGSLHDSGLHAEGsDKR	TGGT1_290700;S268	NaN	NaN	1.01844	1.02423	0.706331	0.0128806	0.916334
hypothetical protein	GGAsPQLK	TGGT1_202890;S341	NaN	1.14011	0.762895	0.750168	1.01217	0.00243329	0.916335
insulin-degrading enzyme	AASYFGSVADVEDAPMETDsSHGDFR	TGGT1_309850;S72	NaN	NaN	1.11052	0.901147	0.737478	0.0135963	0.916382
hypothetical protein	KGsRGESTASGK	TGGT1_259650;S135	NaN	NaN	1.08111	0.793805	0.874283	0.00860662	0.916399
calcium-dependent protein kinase CDPK6	KLGsGAFGDVHLVEER	TGGT1_218720;S1045	NaN	NaN	1.00925	1.04767	0.692972	0.0146999	0.916631
putative aquarius	GRHsVEK	TGGT1_314410;S194	NaN	NaN	0.788	0.85868	1.10327	0.0106839	0.91665
slc30a2 protein	HsVGDCGLR	TGGT1_251630;S423	NaN	0.753577	1.0583	0.870052	0.985319	0.000836928	0.916812
alveolin domain containing intermediate filament IMC1	AAPINPAELsQADIHAMWMR	TGGT1_231640;S429	NaN	NaN	0.719541	0.728841	1.30236	0.0414585	0.916914
MIF4G domain-containing protein	ASsSNFQEGK	TGGT1_254940;S1072	NaN	1.04437	0.934783	1.06071	0.628055	0.00276497	0.91698
RNA-directed RNA polymerase	KVSTEDVAIVsPGKE	TGGT1_318620;S1248	NaN	NaN	1.01027	0.856316	0.884449	0.00265346	0.917012
HECT-domain (ubiquitin-transferase) domain-containing protein	GRtPEAMK	TGGT1_295710T3653	NaN	NaN	0.944954	0.826087	0.980208	0.00257448	0.917083
putative SNAP protein (soluble N-ethylmaleimide-sensitive factor Attachment Protein)	GDsGAGADASAAQLSDIPELLR	TGGT1_218760;S6	NaN	0.846326	0.81133	0.924599	1.08639	0.000644149	0.917161
hypothetical protein	SSGsGAGGGGASAAAR	TGGT1_244460;S918	1.4184	NaN	0.787478	0.822778	0.640149	0.0128239	0.9172
rhoptry protein ROP17	DGRLsPVLGVQER	TGGT1_258580;S113	NaN	NaN	0.862763	0.992893	0.89596	0.00180664	0.917205
WD domain, G-beta repeat-containing protein	ASsLPVSLSSASNHR	TGGT1_263360;S784	NaN	NaN	0.80663	0.944196	1.00093	0.00393168	0.917252
V-type H(+)-translocating pyrophosphatase VP1	DVPEEAsVAASR	TGGT1_248670;S63	0.906348	NaN	0.961846	0.938547	0.862612	2.83323e-05	0.917338
hypothetical protein	KAALLEEDEPGsGVDNAEDSGR	TGGT1_300330;S27	0.945673	0.72466	0.883082	1.051	0.982287	7.74115e-05	0.91734
SWI2/SNF2-containing PHD finger protein	GGAGtPMTPEVPAALAEK	TGGT1_236970T2068	NaN	NaN	0.874804	1.08261	0.794634	0.00863679	0.917349
splicing factor, CC1 family protein	GsPSRsPGPNK	TGGT1_312530;S67; ;S71	NaN	NaN	1.02057	1.02482	0.70666	0.0129338	0.91735
alveolin domain containing intermediate filament IMC14	QIHPGQLFGEGALSSSAVsPR	TGGT1_260540;S465	NaN	NaN	0.751497	0.867841	1.13288	0.0147966	0.917406
hypothetical protein	EFSSPLPSDRsPLR	TGGT1_213040;S266	NaN	NaN	1.07421	0.961802	0.716825	0.012964	0.917612
putative nucleolar protein	LIsHAGALVNLAK	TGGT1_247470;S328	NaN	NaN	0.895314	1.04156	0.816183	0.00513507	0.917686
alveolin domain containing intermediate filament IMC4	SDQHSSGAMTPVsAGAAVGSAPASPAR	TGGT1_231630;S398	NaN	NaN	0.798623	0.780936	1.17376	0.018929	0.917773
alveolin domain containing intermediate filament IMC4	SDQHssGAMTPVSAGAAVGSAPASPAR	TGGT1_231630;S390;;S391	NaN	NaN	0.861446	0.881271	1.01064	0.00258775	0.917786
hypothetical protein	DQADAVDEKtPDAR	TGGT1_213610T814	NaN	NaN	0.937281	0.988264	0.827983	0.00264286	0.917843
transporter, major facilitator family protein	SNASSSVSENVHATQVPQGVAsPR	TGGT1_253700;S938	NaN	NaN	0.84847	0.999537	0.905558	0.00229436	0.917855
AP2 domain transcription factor AP2IX-7	SVsPDHEHVR	TGGT1_290630;S349	NaN	NaN	1.0337	0.80394	0.916049	0.00518178	0.917896
hypothetical protein	RGEDEGGDRsTSR	TGGT1_275990;S292	1.12727	NaN	0.811293	0.915725	0.817558	0.00111772	0.917961
hypothetical protein	EYVPDGSLEGPAsGPEAPGAIR	TGGT1_306020;S4147	NaN	NaN	0.922897	0.830681	1.00047	0.00284548	0.918016
hypothetical protein	GPEATKDAEtEDEETQGAASLSTEFR	TGGT1_211700T2029	NaN	NaN	1.17586	0.828352	0.75	0.0197194	0.918071
RING zinc finger protein	GNsTEMQR	TGGT1_267440;S287	NaN	NaN	0.851604	0.868819	1.03385	0.00397987	0.918091
hypothetical protein	NLAELLEAAGsERDEMEER	TGGT1_299130;S1668	NaN	NaN	1.15533	0.846491	0.752693	0.0170999	0.918171
hypothetical protein	QDERGsLER	TGGT1_264130;S298	0.841139	NaN	0.959415	0.907536	0.964655	6.73622e-05	0.918186
hypothetical protein	VEIGVDRGDEDtGEEEGASR	TGGT1_279320T1668	NaN	NaN	1.05785	0.836735	0.860064	0.00578457	0.918216
hypothetical protein	GGFVsPLESGSRPSGAFVPNQR	TGGT1_320160B;S229	NaN	NaN	0.972034	0.991917	0.790905	0.00481457	0.918285
acetyltransferase, GNAT family protein	RAEPGsPGSFSGMRPQAK	TGGT1_219250;S790	NaN	NaN	0.900847	1.01149	0.843243	0.00287612	0.918527
hypothetical protein	VTFSVLSGQGGRPsPR	TGGT1_221390;S611	NaN	0.9503	0.950768	0.897969	0.875451	1.94501e-05	0.918622
DHHC zinc finger domain-containing protein	TPPsPAEFSGSTSLKPR	TGGT1_293730;S909	NaN	NaN	1.02874	0.937965	0.789679	0.00570127	0.918795
hypothetical protein	DFAWNAEGEAFDsGELR	TGGT1_315080;S604	NaN	NaN	0.982306	0.930703	0.84356	0.00193597	0.918856
WD domain, G-beta repeat-containing protein	SDAGGEGQRLsPSAETER	TGGT1_315140;S754	NaN	NaN	0.788441	0.86133	1.1068	0.0108058	0.918857
hypothetical protein	RGTVAsLEDR	TGGT1_247450;S279	0.958323	0.774116	1.0161	0.975271	0.870637	2.91098e-05	0.91889
hypothetical protein	GAVVSPAsPSHFFSR	TGGT1_207720;S926	NaN	1.10555	0.896482	0.799	0.874537	0.000788912	0.918892
RNA recognition motif-containing protein	RKsPETMR	TGGT1_270640;S87	NaN	NaN	1.07819	0.828062	0.850447	0.00747721	0.9189
putative P-type ATPase4	SIsSVsQMHRDEHAR	TGGT1_278660;S100;;S103	NaN	NaN	0.931114	0.966961	0.859414	0.00118102	0.919163
G-protein beta WD-40 repeat containing protein	sPSSGKNESAESIFHGK	TGGT1_265410;S262	NaN	NaN	0.895337	0.833177	1.02899	0.00392672	0.919168
WD domain, G-beta repeat-containing protein	AALPCTQQsADEIASSSAAK	TGGT1_269770;S36	NaN	NaN	0.868659	0.888458	1.00051	0.00198842	0.919209
hypothetical protein	sLESVGNDNLPSR	TGGT1_289880;S720	0.635458	1.28999	0.852022	0.960962	0.857753	0.00100062	0.919237
alveolin domain containing intermediate filament IMC3	EGTFQMLFPPLAPQPGIPLDQTGAPDVNTIVsVNEQMAGQSR	TGGT1_216000;S485	NaN	NaN	0.815337	0.788321	1.1546	0.0160353	0.919419
hypothetical protein	VSSTSAsPGGASTSSPAR	TGGT1_225690;S855	NaN	NaN	0.865809	0.799738	1.09301	0.00920131	0.919519
hypothetical protein	DSSTDTTDSGsSGETVICTR	TGGT1_320030;S36	NaN	NaN	0.953477	0.977419	0.828148	0.00252331	0.919681
PHD-finger domain-containing protein	SGsETGMGTSGK	TGGT1_224260;S2879	NaN	NaN	0.958292	0.953298	0.847685	0.00153404	0.919758
5'-nucleotidase, C-terminal domain-containing protein	GVAAsDGDDTR	TGGT1_216810;S72	NaN	NaN	0.861111	0.962394	0.935961	0.00108557	0.919822
hypothetical protein	REstSPRR	TGGT1_306220;S541; T542	0.867484	NaN	0.796913	0.857988	1.15738	0.00144719	0.919941
RNA recognition motif-containing protein	ERVDsEDRER	TGGT1_209850;S935	0.816371	0.89343	0.980758	1.01412	0.89507	1.25687e-05	0.91995
hypothetical protein	GAPPETGVSsR	TGGT1_306400;S1066	NaN	NaN	0.86898	0.989421	0.901818	0.00152291	0.920073
NAD(+)/NADH kinase domain-containing protein	AEGREsHEKR	TGGT1_244700;S643	NaN	NaN	1.0428	1.08868	0.628924	0.0243305	0.920135
hypothetical protein	GAsDSGQSELEKPVKK	TGGT1_209250;S1001	NaN	NaN	0.89044	0.989926	0.880076	0.00144514	0.920147
hypothetical protein	ANAEGTSLAItR	TGGT1_220950T299	NaN	NaN	0.830531	0.81373	1.11625	0.0111891	0.92017
3'5'-cyclic nucleotide phosphodiesterase domain-containing protein	ERPPTEVAPQVDGEETCVsDGVHER	TGGT1_241880;S1235	NaN	1.0534	0.786961	0.991346	0.849242	0.000652173	0.920238
RNA recognition motif-containing protein	RLsPFSDR	TGGT1_209850;S551	NaN	0.85234	0.891907	0.898363	1.03844	0.000189227	0.920263
RNA recognition motif-containing protein	LAAETGAsPR	TGGT1_320100;S125	0.568507	0.694875	1.12381	1.11709	1.09757	0.00153468	0.920371
alveolin domain containing intermediate filament IMC12	VFSRVsEAENDNAsER	TGGT1_248700;S258; ;S266	0.775351	NaN	1.09863	1.0352	0.772708	0.00171612	0.920472
ubiquitin-specific protease USP4	GSAGHTsDSAETK	TGGT1_263420;S714	NaN	NaN	0.900648	0.838971	1.02241	0.00340897	0.920676
alveolin domain containing intermediate filament IMC10	AAsGVGLGEEAQISA	TGGT1_230210;S548	NaN	0.916472	0.834423	0.89292	1.03922	0.000224248	0.920759
AP2 domain transcription factor AP2XII-5	ALADELMLDsEDAGFPK	TGGT1_247730;S1495	NaN	NaN	1.04864	1.11241	0.601516	0.0291397	0.920855
phosphatidylinositol 3- and 4-kinase	EKELGsGNEGEK	TGGT1_215700;S1236	NaN	NaN	1.00238	1.0936	0.666667	0.0192962	0.920882
DEAD/DEAH box helicase	GCAtPDAR	TGGT1_220860T49	0.911022	NaN	0.859034	0.977105	0.936438	4.24801e-05	0.9209
hypothetical protein	tLSHTNSLPFSPPADDAIYR	TGGT1_230340T790	NaN	NaN	0.885576	0.878936	0.998232	0.00176186	0.920915
signal peptidase	LEEEARsR	TGGT1_214090;S1070	0.669418	NaN	1.1723	1.07448	0.767553	0.00462484	0.920938
hypothetical protein	RSVsPGVNSESSPSDELTK	TGGT1_250820;S541	0.776881	1.18419	0.879357	0.874779	0.890005	0.000180802	0.921042
ATG C terminal domain-containing protein	DVHGESsQDDKGER	TGGT1_304630;S6434	NaN	NaN	1.00503	0.932061	0.826539	0.00314824	0.92121
ABC transporter transmembrane region domain-containing protein	TADsEAGGSSGGAGGEAK	TGGT1_320460;S721	NaN	NaN	0.933557	1.06064	0.769477	0.00826571	0.921225
rhoptry protein ROP18	GAAQNFEQQEHLHtE	TGGT1_205250T553	0.714808	1.03012	0.827708	0.880597	1.15297	0.000279624	0.921241
hypothetical protein	LHPPADGGGLVsPSALR	TGGT1_232120;S1407	NaN	NaN	0.868445	0.970629	0.925173	0.00102745	0.921416
AP2 domain transcription factor AP2XII-1	DSLsPDASSR	TGGT1_218960;S2251	1.22715	NaN	0.923716	0.837414	0.697585	0.00376278	0.921466
hypothetical protein	ETGDWDRDEsPGWYR	TGGT1_206540;S1205	NaN	NaN	0.892394	0.977605	0.894457	0.000926371	0.921485
hypothetical protein	EVTTFLsDLYQQTQR	TGGT1_247380;S574	NaN	NaN	0.817851	0.838432	1.10818	0.0101466	0.921488
hypothetical protein	THtNPTGAESEPVVEEPVDEEAVIDLEPR	TGGT1_293360T113	NaN	NaN	1.05236	0.699464	1.01265	0.0143532	0.921491
putative phosducin	GRDDEsDEEKER	TGGT1_246100;S293	1.0842	NaN	0.968825	0.952132	0.681629	0.00169197	0.921695
hypothetical protein	GKSEVEEVEEGsDSGDKVQNR	TGGT1_214990;S1154	NaN	NaN	1.24961	0.964744	0.550894	0.0451722	0.921749
RNA recognition motif-containing protein	DLPAVCSGGsDSALR	TGGT1_211020;S58	NaN	1.05957	0.962658	0.885699	0.779294	0.000579763	0.921805
hypothetical protein	GASsGQAK	TGGT1_246740;S32	NaN	NaN	0.930204	0.863424	0.971952	0.00117339	0.92186
hypothetical protein	GLStPERPSEDGGAGTK	TGGT1_210700T363	NaN	NaN	0.800234	0.996879	0.968577	0.0044033	0.921897
hypothetical protein	YGEAsVDDTQRR	TGGT1_226380;S85	1.05245	NaN	0.841221	0.92978	0.864135	0.000296782	0.921898
hypothetical protein	sAAHLER	TGGT1_249580;S615	NaN	NaN	0.908158	0.852451	1.0053	0.00233827	0.92197
rRNA pseudouridine synthase	EATsDPGLVASAGTEGGK	TGGT1_214210;S6	0.921766	0.922241	NaN	NaN	NaN	0.000164025	0.922004
ATP-binding cassette sub-family F member 1	KSDEEsEGAAEDAETDDAEPTAGASPSEK	TGGT1_318710;S564	0.899749	NaN	0.958805	0.916325	0.913223	5.86409e-06	0.922026
dense granule protein GRA7	LALPAVGMGAsYFAADR	TGGT1_203310;S153	NaN	NaN	0.858399	0.907282	1.00048	0.00203662	0.922054
hypothetical protein	SQsPDISAPFAPK	TGGT1_276220;S622	NaN	NaN	1.07578	0.902013	0.788462	0.00810974	0.922085
RNA recognition motif-containing protein	RQAsGEDASASR	TGGT1_283878;S125	1.21197	NaN	0.830058	0.85975	0.78733	0.00251947	0.922276
nmda receptor glutamate-binding chain	sENSIATGVGPTPVGR	TGGT1_309560;S5	NaN	NaN	0.95024	0.93342	0.883422	0.000472931	0.922361
hypothetical protein	sAQAsVHADPNELK	TGGT1_221390;S177;;S181	0.942466	NaN	0.915989	1.12612	0.704874	0.00174783	0.922362
hypothetical protein	ATLAsMPsEMFR	TGGT1_315750;S66;;S69	NaN	NaN	1.07187	0.909917	0.785421	0.00798572	0.922403
hypothetical protein	ASSVVsMTAAGFLSEETPR	TGGT1_313430;S5350	NaN	NaN	0.855865	0.85537	1.05621	0.00521276	0.922482
hypothetical protein	EERDsSQSAVLR	TGGT1_261450;S981	1.0012	NaN	0.959555	0.867519	0.861718	0.000114789	0.922498
hypothetical protein	SRsPDTQLPFAR	TGGT1_238880;S220	NaN	NaN	0.932844	0.866634	0.968343	0.0010419	0.922607
hypothetical protein	AANACDEHNASHtPR	TGGT1_245580T1893	NaN	NaN	0.745198	1.04858	0.974504	0.00965235	0.922761
hypothetical protein	SSQSGSAsPK	TGGT1_214800;S104	NaN	NaN	1.19609	0.768939	0.803352	0.0213407	0.922794
non-specific serine/threonine protein kinase	GDsEDAR	TGGT1_268370;S2604	0.953133	0.892706	NaN	NaN	NaN	0.0208334	0.92292
hypothetical protein	FASGQPDAGQGsDSSR	TGGT1_206670;S271	NaN	NaN	0.981266	0.87567	0.912138	0.00112354	0.923025
RNA recognition motif-containing protein	QGGEtEEETPR	TGGT1_218600T537	NaN	NaN	0.895267	0.912659	0.961538	0.00046145	0.923155
hypothetical protein	GPEDDAVLRPPSLSPTTADVFEDGEDsGHMR	TGGT1_217530;S205	NaN	NaN	0.947653	0.910097	0.912046	0.000174758	0.923265
putative CMGC kinase	EAsEALDNR	TGGT1_250850;S2187	NaN	NaN	1.10546	1.0527	0.61165	0.0275683	0.92327
hypothetical protein	RQHRDsENEGGVK	TGGT1_252340;S1128	NaN	0.919276	1.09353	0.925428	0.755408	0.000903206	0.923411
MIF4G domain-containing protein	DAsPQANR	TGGT1_269180;S1758	0.649215	1.04034	1.14698	1.13914	0.641612	0.00130785	0.923456
hypothetical protein	VVPDDNRNsTDGAAHFVNQTNTGDK	TGGT1_262935;S322	NaN	0.722952	0.904627	1.03443	1.03186	0.00108201	0.923467
rhomboid protease ROM4	APAsDVDGsSK	TGGT1_268590;S150; ;S155	0.756547	NaN	1.07991	0.926976	0.931311	0.000793062	0.923686
CRAL/TRIO domain-containing protein	RLsKPAEAMQGAEDNAQNSEEEKPQAHAER	TGGT1_254390;S588	NaN	NaN	1.03428	0.834807	0.90201	0.00399991	0.923699
hypothetical protein	EDRFEREEsPESPVSPR	TGGT1_312190;S28	NaN	NaN	0.994094	0.929955	0.847168	0.00211283	0.923739
hypothetical protein	RVsRsPGQGK	TGGT1_247450;S289;;S291	0.868958	NaN	0.945511	1.04343	0.837269	0.000268068	0.923792
LNS2 (Lipin/Ned1/Smp2) protein	SPVASGEEPEGAPAtLsRSASQAAADAEQERER	TGGT1_230690T208;;S210	NaN	NaN	0.982824	0.833711	0.954876	0.00244499	0.923804
hypothetical protein	QSAsDDTTHLELVR	TGGT1_225160;S106	NaN	NaN	0.92868	0.927372	0.915622	2.01945e-05	0.923891
hypothetical protein	VTNQGsTEGTSPVK	TGGT1_203780;S532	NaN	NaN	0.889922	0.914037	0.967727	0.00061889	0.923895
selenide, water dikinase	TGKGEDCStPR	TGGT1_280560T309	1.02436	NaN	0.97549	0.991304	0.704497	0.0011006	0.923914
eIF2 kinase IF2K-D (incomplete catalytic triad)	AVSAStPR	TGGT1_319610T474	NaN	NaN	0.943061	1.02838	0.800532	0.00513395	0.923991
hypothetical protein	RsPTQVPK	TGGT1_306400;S468	NaN	NaN	0.983946	0.912846	0.875455	0.0011835	0.924082
hypothetical protein	ATEGVTVsEVVEDETPSHVSAPTEPGR	TGGT1_247440;S283	NaN	NaN	0.795249	1.06292	0.914101	0.00694798	0.92409
putative vacuolar protein sorting 29	DISDADAAsSAEK	TGGT1_252490;S199	NaN	NaN	0.928299	1.06178	0.782395	0.00753508	0.924158
protein phosphatase 2C domain-containing protein	SSTMDsGSQISR	TGGT1_267100;S783	NaN	NaN	0.920348	0.831347	1.02102	0.00349565	0.924238
RNA recognition motif-containing protein	sKPLDAAAEPPK	TGGT1_265250;S537	NaN	NaN	0.860979	0.858993	1.05284	0.00480301	0.924271
putative ubiquitin specific protease 39 isoform 2	SAAVDDDDDIFAADsENEDEEEGPDAEGPKQEVETK	TGGT1_294360;S545	1.01897	0.960084	0.86943	0.824443	0.948485	1.15438e-05	0.924282
slc30a2 protein	ELAsFPEVDEHWPHR	TGGT1_251630;S390	NaN	NaN	0.953526	0.915234	0.904145	0.000261812	0.924302
ABC transporter transmembrane region domain-containing protein	STAsFHEGETR	TGGT1_305590;S1711	NaN	NaN	0.960774	0.918211	0.894022	0.000445277	0.924336
alveolin domain containing intermediate filament IMC3	VDVTVSQsPAGPHsPLSASPQTGTAASLK	TGGT1_216000;S332;;S338	NaN	NaN	0.852799	0.834264	1.08611	0.00759761	0.924391
phosphatidylinositol-4-phosphate 5-Kinase	GRsADQEK	TGGT1_245730;S1304	NaN	NaN	1.01059	0.885504	0.877532	0.0021647	0.924542
NLI interacting factor family phosphatase	ESAEAMASAAQsELEEGAAEAIAAETER	TGGT1_202550;S528	NaN	NaN	0.962963	0.9818	0.829511	0.00267588	0.924758
hypothetical protein	SPsNPEELTR	TGGT1_232120;S1325	0.747182	NaN	1.08418	1.03442	0.833256	0.00140481	0.924759
Ser/Thr phosphatase family protein	VLDQLsPK	TGGT1_269460;S1987	NaN	NaN	1.04453	0.837188	0.892696	0.00446018	0.924805
hypothetical protein	GPPTWAVVPTPtHR	TGGT1_225690T1782	NaN	NaN	0.91682	0.902705	0.955113	0.000286434	0.924879
hypothetical protein	TRTEEQTHQDANsETDR	TGGT1_230400;S1876	0.781474	NaN	1.07483	1.08627	0.757033	0.00196679	0.924902
hypothetical protein	VSTVsPTTSVSGDRGER	TGGT1_233220;S1327	NaN	0.864702	1.00502	0.839426	0.991387	0.000213571	0.925134
Sin3-associated polypeptide SAP18	HAsPHGPGAMDSR	TGGT1_201400;S316	1.09463	1.16782	0.813987	0.796121	0.753197	0.000413742	0.925152
dense granule protein GRA7	GTDDHLTTsMDKASVESQLPR	TGGT1_203310;S72	NaN	0.57447	0.847756	0.763003	1.5155	0.0203024	0.925182
josephin protein	EALRLsLETYK	TGGT1_229650;S293	NaN	NaN	1.01911	0.912969	0.843838	0.00302071	0.925306
nucleolar protein	AAGLLSPEEAAsPR	TGGT1_224970;S815	NaN	NaN	1.15925	0.92993	0.68688	0.0210385	0.925353
rhomboid protease ROM5	GGsGGSAGELR	TGGT1_294690;S147	NaN	NaN	0.913882	0.931705	0.930591	3.87986e-05	0.925393
putative RNA binding protein	TRAPsALDGEDHEIDIASLTAK	TGGT1_203540;S550	NaN	NaN	0.938689	1.04334	0.794153	0.00603895	0.925394
Sin3-associated polypeptide SAP18	KTSGASAsNK	TGGT1_201400;S48	NaN	NaN	0.955281	1.00473	0.817136	0.00365702	0.925716
rhoptry protein ROP12	GTRtITVNVR	TGGT1_203990T206	NaN	NaN	0.872919	0.954004	0.950292	0.000814203	0.925738
rhoptry neck protein RON9	QTEEQANAsQSSETPAEENAQEPK	TGGT1_308810B;S303	0.640904	NaN	1.0646	1.01121	0.986332	0.00239217	0.925761
FYVE zinc finger domain-containing protein	KLsPVPSDMsENENPR	TGGT1_237870;S88; ;S95	NaN	NaN	1	0.7869	0.990901	0.00559734	0.925934
FAD binding domain-containing protein	TSNSDAMsDDAGLR	TGGT1_220360;S10	NaN	NaN	0.94087	0.987721	0.849292	0.00192172	0.925961
PRP38 family protein	KTDRsPsHGR	TGGT1_285230;S530; ;S532	NaN	NaN	0.894249	1.13735	0.746334	0.0148172	0.925978
hypothetical protein	VASEAQEPEETEsPR	TGGT1_239400;S1111	1.05091	0.807294	0.93691	0.888677	0.946723	2.01587e-05	0.926103
bromodomain-containing protein	SADGAEGGSQFLSGGDFWMGPHAPHTAASPGsGGEK	TGGT1_264640;S356	NaN	NaN	0.765306	0.976792	1.03625	0.00778916	0.926116
hypothetical protein	RAsPFRPGAFR	TGGT1_211150;S1898	NaN	NaN	1.04067	0.986046	0.75171	0.00903421	0.926142
hypothetical protein	sSSAAGDVGDSSPSLTR	TGGT1_233160;S600	NaN	NaN	0.924282	0.939245	0.914903	5.85718e-05	0.926143
hypothetical protein	HHSGTMTPLsPR	TGGT1_205680;S750	NaN	NaN	0.961434	0.936765	0.880332	0.000670986	0.926177
hypothetical protein	EFLEPsAFPGAGAHR	TGGT1_249990;S358	NaN	NaN	0.933148	0.913801	0.931664	4.50444e-05	0.926204
putative DNA replication licensing factor	ASGLDRsPLR	TGGT1_214970;S12	NaN	NaN	0.877407	1.03691	0.864386	0.00356676	0.926234
hypothetical protein	SRsTDTGDPEWQNR	TGGT1_246590;S378	NaN	NaN	0.880682	0.807166	1.09124	0.0083389	0.926363
hypothetical protein	NAsCPCLVPSLWALDSR	TGGT1_278030;S151	NaN	NaN	1.11423	0.79763	0.867296	0.0105801	0.926385
RNA recognition motif-containing protein	AGNEGKADEsDASK	TGGT1_215400;S66	0.889336	1.37624	0.858291	0.826261	0.682255	0.00141701	0.926478
hypothetical protein	QNLSEKsPAETEKK	TGGT1_248740;S1109	NaN	0.81206	1.0278	0.972165	0.894064	0.000285027	0.926522
sarco/endoplasmic reticulum Ca2+-ATPase	QLSLSRsQSQLR	TGGT1_230420;S1085	NaN	NaN	0.778633	0.864384	1.13671	0.0133015	0.926576
putative cell-cycle-associated protein kinase CDK	DRETEEtPPGEEMESQVGYR	TGGT1_249260T1527	1.0099	NaN	0.950917	0.880093	0.866041	0.000102451	0.926737
putative elongation factor EF-G	IAAIHEVRGsDGVGAK	TGGT1_260170;S195	0.802575	1.11954	1.01912	0.782927	0.909615	0.000132801	0.926756
hypothetical protein	SEAPLEETGKPKPEVDTLEtSATR	TGGT1_230160T115	NaN	NaN	1.11222	0.892688	0.775383	0.0111568	0.926764
hypothetical protein	KLPsVQFK	TGGT1_288460;S1780	NaN	NaN	0.872955	0.952984	0.954545	0.000843831	0.926828
RNA recognition motif-containing protein	GsDGGPEK	TGGT1_265250;S1332	0.969995	NaN	0.906793	0.894245	0.936596	1.33188e-05	0.926907
hypothetical protein	RLSVssLQREEEK	TGGT1_309250;S1587; ;S1588	NaN	NaN	0.961558	1.02407	0.795124	0.00538925	0.926917
ULK kinase	ISVTDSQQsFHSK	TGGT1_235750;S359	NaN	NaN	0.96129	0.893288	0.926374	0.00044826	0.926984
hypothetical protein	ARsAETEEKER	TGGT1_248510;S4507	NaN	NaN	1.04389	0.992424	0.744801	0.00977263	0.927038
hypothetical protein	EQsELGSVWYR	TGGT1_289880;S670	NaN	NaN	0.922335	0.865638	0.993362	0.00158447	0.927112
hypothetical protein	SRsVEAAQAGR	TGGT1_306400;S651	1.24762	NaN	0.783014	0.783879	0.894091	0.0035007	0.92715
hypothetical protein	SSsPTPPASTASNR	TGGT1_294980;S109	NaN	NaN	1.02105	1.01115	0.749434	0.00907488	0.927211
hypothetical protein	TRFDEPLYGRPQsPR	TGGT1_234270;S199	NaN	NaN	0.969664	1.06355	0.748624	0.00998284	0.927279
DEAD/DEAH box helicase domain-containing protein	GHEsDEEGEQETPAGGVFVQHGESILLLDR	TGGT1_264160;S793	NaN	NaN	0.987594	0.871484	0.923077	0.00130911	0.927385
hypothetical protein	VPADTQsPCCGAK	TGGT1_220240;S247	NaN	NaN	0.861433	0.842602	1.07813	0.00657412	0.927388
thioredoxin domain-containing protein	SSNEYNEsEKDK	TGGT1_266620;S203	NaN	0.710831	1.27811	0.970253	0.750802	0.00567342	0.927499
hypothetical protein	RLtRPACR	TGGT1_213067T183	NaN	NaN	0.915411	0.898007	0.969163	0.000532676	0.927527
hypothetical protein	DPsPKEPTQTEQVSDAPSEDPER	TGGT1_226580;S13	1.11435	NaN	0.832088	0.795153	0.968709	0.00103406	0.927575
vacuolar (h+)-atpase g subunit protein	AWNDEDEFHIDLsDTEQPR	TGGT1_228200;S440	NaN	1.17689	0.914144	0.841451	0.778237	0.00179814	0.92768
hypothetical protein	TTPVtPPLEK	TGGT1_220600T430	NaN	NaN	0.954665	0.890556	0.937928	0.000427964	0.927716
HECT-domain (ubiquitin-transferase) domain-containing protein	RAsGQFHIDPEILR	TGGT1_280660;S1452	NaN	NaN	0.993759	0.981225	0.808266	0.00413606	0.92775
RNA recognition motif-containing protein	GLsREREEK	TGGT1_209850;S36	NaN	1.17293	0.727787	0.789385	1.02126	0.00291065	0.92784
hypothetical protein	KTNsSASVK	TGGT1_205320;S643	NaN	1.30165	0.509178	0.653696	1.24704	0.0195147	0.927891
myosin F	ALADGALAAQLSQGTEtPEAWR	TGGT1_278870T789	NaN	NaN	0.788127	1.00729	0.988276	0.00565906	0.927898
hypothetical protein	GGYFsDDVRK	TGGT1_233220;S1228	NaN	1.04397	0.928213	0.944933	0.795104	0.000365244	0.928055
surface antigen repeat-containing protein	RVsGGETADAASPQFAR	TGGT1_213392;S449	NaN	1.14296	0.850523	0.909593	0.809696	0.00111301	0.928194
hypothetical protein	VSPPSAsPR	TGGT1_261430;S521	NaN	0.833333	0.95941	0.958333	0.96171	8.68944e-05	0.928197
hypothetical protein	LEFTTTGsTEVVGAGDRVDGHEALLR	TGGT1_232080;S5659	NaN	NaN	0.894305	1.03045	0.86021	0.00312348	0.928322
Na+/H+ exchanger NHE3	RQsREEDSDVDDMTR	TGGT1_305180;S1195	NaN	NaN	0.974168	0.849301	0.961674	0.00182402	0.928381
hypothetical protein	LPLSQVPGsPR	TGGT1_235340;S279	NaN	0.588726	1.00044	1.02411	1.10032	0.003992	0.928399
hypothetical protein	RREPsPPAR	TGGT1_283510;S132	0.933881	1.07035	0.935741	0.816558	0.885598	2.38128e-05	0.928425
WD domain, G-beta repeat-containing protein	AALNPTSYVLAsQELSELR	TGGT1_289550;S31	NaN	NaN	0.87858	0.856863	1.04988	0.00429485	0.928441
putative DNA replication licensing factor	RTEEDsEADVNADGER	TGGT1_214970;S21	0.794526	1.00568	0.900513	1.02129	0.920586	2.21744e-05	0.928519
hypothetical protein	sGLESHSFGR	TGGT1_221390;S771	NaN	NaN	0.902439	1.01795	0.865523	0.00243523	0.928637
hypothetical protein	GsGALGARPER	TGGT1_252430;S455	NaN	1.05451	0.927985	0.871614	0.860627	0.000240022	0.928685
hypothetical protein	RLDsGSDASAVGR	TGGT1_218070;S268	NaN	NaN	0.911111	0.8752	1	0.00159121	0.92877
HECT-domain (ubiquitin-transferase) domain-containing protein	ESQLSPVGPPVAPVERPRPVGsVGSPR	TGGT1_280660;S2025	NaN	1.47977	0.805569	0.91996	0.510439	0.019552	0.928935
hypothetical protein	AAsQGDVQPSPLDEEKPVPSSPR	TGGT1_247600;S41	NaN	NaN	0.915663	0.810964	1.0603	0.00600007	0.928976
hypothetical protein	SVSVSAGsHR	TGGT1_255895;S293	NaN	NaN	1.03308	0.866732	0.887228	0.00316253	0.929013
hypothetical protein	SHAsKHR	TGGT1_225890;S1719	NaN	NaN	1.0286	0.886212	0.872545	0.00287162	0.929119
Sec7 domain-containing protein	GVPGLLVPSLGGLSsPR	TGGT1_232190;S2101	NaN	NaN	1.08979	0.96535	0.732291	0.0124789	0.929144
hypothetical protein	AEsQSELNR	TGGT1_223790;S713	NaN	NaN	0.865759	0.780399	1.14141	0.0134671	0.929189
hypothetical protein	ELLFsEEETEVPAER	TGGT1_321410;S177	NaN	NaN	0.927995	1.16038	0.699495	0.0198885	0.92929
hypothetical protein	GAAEsTDDLSGK	TGGT1_316340;S55	0.780986	0.934388	0.808473	0.833443	1.28938	0.000579359	0.929334
zinc finger, C3HC4 type (RING finger) domain-containing protein	AERsGELADVSGEGGQR	TGGT1_223880;S520	NaN	NaN	0.900157	0.962102	0.925945	0.000373439	0.929401
adaptin c-terminal domain-containing protein	TRsFFENQAK	TGGT1_272600;S477	NaN	NaN	0.813933	1.09716	0.877132	0.00842214	0.929408
Tyrosine kinase-like (TKL) protein	KAEMAEEDsGRSSVR	TGGT1_301270;S799	0.927608	NaN	0.827551	0.759102	1.20374	0.00246566	0.9295
hypothetical protein	LSQLAFGsAPDMAGVAAGR	TGGT1_286600;S67	NaN	NaN	0.832044	0.971223	0.985507	0.00276107	0.929591
hypothetical protein	KDsQGGSQGGEK	TGGT1_233160;S1484	NaN	NaN	0.943081	0.867222	0.978836	0.00125038	0.929713
FAD binding domain-containing protein	DADRADANAADsDR	TGGT1_220360;S747	1.21104	NaN	0.864238	0.888507	0.755204	0.00249333	0.929746
hypothetical protein	SSAsVTGGK	TGGT1_238380;S17	NaN	NaN	1.03803	0.940087	0.811321	0.00494767	0.929813
hypothetical protein	KSEQsDDGGQSLR	TGGT1_204490;S256	0.837414	NaN	1.19484	1.15325	0.534247	0.00913318	0.929938
Sec7 domain-containing protein	RYPQDRPPtPPPPPPPPRPPSLGTPPDLGVKPR	TGGT1_232190T3118	NaN	NaN	1.07429	0.953192	0.762579	0.00938281	0.93002
histone lysine methyltransferase SET1	SEREEsGEKR	TGGT1_226810;S290	NaN	NaN	1.01081	0.904548	0.875059	0.00195852	0.930139
calcium-dependent protein kinase CDPK2A	LESAGAAPs	TGGT1_206590;S786	0.947963	0.912376	NaN	NaN	NaN	0.0121767	0.93017
hypothetical protein	EVATEEWIsPQSTR	TGGT1_313440;S83	NaN	NaN	0.902222	0.996002	0.892337	0.00125858	0.930187
hypothetical protein	SGEKPGSAADsADEDsPSRGPLPAASLK	TGGT1_203370;S557;;S562	NaN	NaN	1.0078	0.896423	0.886492	0.00174291	0.930238
hypothetical protein	ARsRsVEAAQAGR	TGGT1_306400;S649;;S651	NaN	NaN	1.02227	0.84937	0.919091	0.00290208	0.930244
PHD-finger domain-containing protein	RLsAPSGGTMETR	TGGT1_234900;S3560	NaN	NaN	0.962545	0.932203	0.896084	0.00042613	0.930277
dense granule protein GRA14	VQPTAPPAPAsMLYPsLHR	TGGT1_239740;S392;;S397	NaN	NaN	0.856731	0.907354	1.02675	0.00292243	0.930278
sarco/endoplasmic reticulum Ca2+-ATPase	LDEFGEILsK	TGGT1_230420;S306	NaN	NaN	1.05749	0.936073	0.797274	0.00646662	0.930279
hypothetical protein	ASSSDLTsPVR	TGGT1_251770;S1252	NaN	NaN	0.928131	1.01782	0.845309	0.00285405	0.93042
hypothetical protein	SAKsLENER	TGGT1_288040;S625	NaN	NaN	1.07485	0.887614	0.828856	0.00629463	0.93044
hypothetical protein	EASSGDEtDLELR	TGGT1_252340T725	NaN	NaN	0.837978	0.889301	1.06406	0.00536542	0.930446
putative peptidyl-prolyl isomerase FKBP12	GQsATVHATGSVLKPDGTTQK	TGGT1_228360;S270	NaN	NaN	0.926316	0.961921	0.903461	0.000333931	0.930566
PLU-1 family protein	AVsEHEEGsVGQDSVSPGTK	TGGT1_253750;S6613;;S6619	NaN	NaN	1.08988	0.926817	0.775464	0.00938092	0.93072
hypothetical protein	ANsVAVANTIIPR	TGGT1_226380;S70	NaN	NaN	1.04122	0.938493	0.812658	0.00500415	0.93079
hypothetical protein	NAGGSSEDRERsTER	TGGT1_264130;S287	NaN	NaN	0.874469	0.909385	1.0087	0.00186061	0.930851
phosphatidylinositol 3- and 4-kinase	AASRGsAK	TGGT1_276170;S597	NaN	NaN	0.887863	0.945431	0.95936	0.000552178	0.930885
hypothetical protein	KAsVsQSSR	TGGT1_247450;S839;;S841	NaN	NaN	0.92322	0.889626	0.979979	0.000801216	0.930942
hypothetical protein	sAEGVGEDLFLSPDAGR	TGGT1_232080;S5705	NaN	NaN	0.811776	0.90668	1.07446	0.00673611	0.930972
Ras family protein	LQAAPsPR	TGGT1_249170;S25	NaN	NaN	0.960883	0.837296	0.994881	0.00263419	0.93102
nuclear movement family protein	VNKIEELtEEEER	TGGT1_233680T115	NaN	NaN	0.964561	0.830562	0.997958	0.00300465	0.931027
Sin3-associated polypeptide SAP18	SVVGDSSGDREAEEEAASISLDKGGDEtPVEEK	TGGT1_201400T671	1.04748	1.09023	0.999524	0.809366	0.708866	0.000222444	0.931094
hypothetical protein	RHGDsDDEDFSTSVQQR	TGGT1_269260;S20	NaN	1.34728	0.914272	0.833333	0.629739	0.0085948	0.931155
ATPase, AAA family protein	IAssDDEDSSPR	TGGT1_235170;S127;;S128	0.920137	NaN	0.919774	0.987115	0.897959	1.96965e-05	0.931246
hypothetical protein	GAAHsEKGEsPETPLAQAAAEEEREER	TGGT1_209210;S48;;S53	NaN	NaN	1.23237	0.732423	0.829391	0.0259617	0.931395
hypothetical protein	QALLQENDsLDGRQEEAK	TGGT1_273320;S191	NaN	1.10018	0.926059	0.832797	0.866576	0.000565765	0.931404
hypothetical protein	TQGDsDVETDMR	TGGT1_238880;S2496	NaN	NaN	0.887723	1.11578	0.791434	0.0104886	0.931646
hypothetical protein	SSsIAEEEK	TGGT1_262450;S1412	1.00717	NaN	1.03266	0.904832	0.781959	0.000499167	0.931655
RNA recognition motif-containing protein	SGGPGAGGYYGLHPTGSPsPPR	TGGT1_217540;S281	NaN	NaN	0.909338	0.956276	0.929503	0.000212829	0.931706
hypothetical protein	ELATPNAPQEGsEEKGAASDGSDPR	TGGT1_242570;S335	NaN	NaN	0.934315	0.880101	0.980779	0.000973483	0.931732
alveolin domain containing intermediate filament IMC12	HAEKEAAVGSLAssPR	TGGT1_248700;S249;;S250	NaN	NaN	0.960831	0.938027	0.896609	0.000406676	0.931822
hypothetical protein	RGPsADIGQR	TGGT1_283550;S4010	1.03142	NaN	0.890909	0.820912	0.984527	0.000282903	0.931942
WD domain, G-beta repeat-containing protein	RsGDFAPFGGSTSR	TGGT1_248290;S2152	NaN	NaN	0.870581	0.998904	0.926614	0.00158434	0.932033
dense granule protein GRA12	AsETGSGLAASFLNTVEVR	TGGT1_288650;S315	NaN	NaN	0.870265	0.923343	1.00258	0.00169692	0.932063
hypothetical protein	ATALPIsKSDILSEPGVVDSEGK	TGGT1_225690;S513	NaN	NaN	0.908548	0.839005	1.04905	0.00436305	0.932201
AP2 domain transcription factor AP2VIII-2	RAQGTPLsPSSQQAMTALVASALAAAASR	TGGT1_233120;S2165	NaN	NaN	0.883103	1.04177	0.872011	0.00344115	0.932295
protein phosphatase 2C domain-containing protein	sSAGEEEK	TGGT1_267100;S222	0.773481	NaN	1.03858	0.90584	1.01162	0.000585238	0.93238
hypothetical protein	RGsAPGEAVQDELLGK	TGGT1_237520;S100	NaN	0.857875	0.934507	0.819718	1.11758	0.000774232	0.93242
ubiquitin carboxyl-terminal hydrolase	GGEEQsESETENERR	TGGT1_221610;S710	0.883956	NaN	0.849384	0.9961	1.00045	0.000156089	0.932472
hypothetical protein	GSAGLEsPIAAELEEGEEKPSPEKR	TGGT1_210370;S399	NaN	NaN	1.00056	0.739227	1.05849	0.0109028	0.932759
hypothetical protein	TIAAVTEsDGEDAEASGDATADGKK	TGGT1_203370;S583	0.986314	NaN	0.98608	0.934864	0.823832	0.000151461	0.932772
histone H3.3	SAPMsGGIK	TGGT1_218260;S33	NaN	NaN	0.786333	0.988018	1.02405	0.00622938	0.9328
adaptin c-terminal domain-containing protein	GDASSLsAGDAIPR	TGGT1_272600;S810	NaN	NaN	0.954607	0.954747	0.889375	0.000543975	0.93291
RNA recognition motif-containing protein	DLsMDKGR	TGGT1_209850;S1047	NaN	NaN	1.00962	0.976849	0.812302	0.00425477	0.932924
rhoptry neck protein RON9	QAEEQANAsQSSATPAEENAQEPK	TGGT1_308810B;S375	0.709604	NaN	1.09645	0.904269	1.0216	0.00158073	0.932981
trehalose-phosphatase	VSPsREASPLPSSLPASSTDSSGQTEK	TGGT1_297720;S172	1.07121	NaN	0.983377	0.971891	0.705724	0.00130257	0.933049
hypothetical protein	DREEETSsLLAGEEPR	TGGT1_246178;S61	NaN	NaN	1.0693	0.972337	0.757638	0.00959914	0.933092
LNS2 (Lipin/Ned1/Smp2) protein	EVPSVAGDVtRSPVASGEEPEGAPATLSR	TGGT1_230690T192	NaN	NaN	0.858779	0.728591	1.21203	0.0231269	0.933133
hypothetical protein	GAGsQPASAGK	TGGT1_228120;S688	NaN	NaN	0.876749	0.941039	0.982199	0.00107907	0.933329
hypothetical protein	LGQSIPLELPEFPLEtPSR	TGGT1_230340T159	NaN	NaN	0.893468	0.936585	0.969938	0.000561975	0.93333
hypothetical protein	RGsEEELSPEEEVAPWIEGLAAR	TGGT1_286230;S1336	NaN	NaN	0.89071	1.05286	0.856565	0.00418178	0.933378
hypothetical protein	QSsPIPR	TGGT1_248940;S260	0.715621	NaN	0.973346	1.0605	0.984587	0.00112491	0.933513
hypothetical protein	REAsPDRGDPPCVPEDR	TGGT1_279320;S4146	0.839481	NaN	1.1222	0.846677	0.925943	0.000760435	0.933575
photosensitized INA-labeled protein PHIL1	HPLAQEYFsER	TGGT1_258410;S37	NaN	NaN	0.916031	0.962115	0.923077	0.000235511	0.933741
nucleolar protein	GLLPTALSAAPGsDQETGDNAPALR	TGGT1_224970;S780	NaN	NaN	1.13221	1.01952	0.649504	0.0235232	0.933745
hypothetical protein	LPPTEAAALtPPAGR	TGGT1_210380T164	NaN	NaN	0.937945	0.915984	0.947419	9.93922e-05	0.933783
DEAD/DEAH box helicase domain-containing protein	KRsEEASEETDTPETVEAQSAK	TGGT1_309570;S27	0.919163	NaN	0.976842	1.00809	0.831403	0.000157258	0.933874
arginine decarboxylase	QFGsRDSILLAPSSSR	TGGT1_280700;S21	NaN	0.760046	1.0005	0.994764	0.980349	0.000523964	0.933915
Sec7 domain-containing protein	SSVAAsPSASFR	TGGT1_232190;S3051	NaN	NaN	0.943152	0.96231	0.896434	0.000438482	0.933965
SWI2/SNF2-containing protein RAD16	KAGDsESEGSAR	TGGT1_226440;S790	NaN	NaN	0.945061	0.882353	0.974492	0.000845228	0.933969
emp24/gp25L/p24 family protein	AEMKPAAPDEDsEEEEGDLEER	TGGT1_310750;S376	1.40763	0.270771	1.05287	1.19706	0.741678	0.00919968	0.934003
hypothetical protein	STEDDQLsSR	TGGT1_284780;S668	0.540767	NaN	1.05696	1.32966	0.80939	0.0116219	0.934194
alveolin domain containing intermediate filament IMC14	RVPISGPAtPVLMER	TGGT1_260540T243	NaN	NaN	0.914029	0.923348	0.965315	0.000284937	0.934231
transducin beta-like protein TBL1	EGSEDVASASGLLASLAEGAAtPR	TGGT1_309140T119	NaN	NaN	0.886062	1.01787	0.899188	0.00200674	0.934373
zinc knuckle domain-containing protein	YLsPNAGDDPQAAFDSR	TGGT1_321560;S434	NaN	NaN	1.04128	0.887826	0.874036	0.00327422	0.934381
RNA recognition motif-containing protein	RTsGISK	TGGT1_265250;S749	NaN	NaN	1.0861	0.939568	0.777531	0.00897319	0.9344
RNA recognition motif-containing protein	VFVGNTPLAVREPsVER	TGGT1_304760;S191	NaN	0.959299	0.963691	0.887939	0.926738	1.45878e-05	0.934417
AP2 domain transcription factor AP2XII-4	EtDEGQGAKSETDRAPEDDR	TGGT1_247700T259	NaN	NaN	1.17886	1.00728	0.617113	0.0302111	0.934418
hypothetical protein	HEAsDEDTEAETGKR	TGGT1_254300;S849	NaN	1.05605	0.94838	0.923497	0.810522	0.00034185	0.934612
DEAD/DEAH box helicase domain-containing protein	SEEASEEtDTPETVEAQSAK	TGGT1_309570T34	0.919163	NaN	0.833684	1.06203	0.923576	0.000282224	0.934613
hypothetical protein	SSVMSVEsLASK	TGGT1_241170;S365	NaN	NaN	1.03861	0.90314	0.862381	0.0032317	0.93471
endonuclease/exonuclease/phosphatase family protein	VAQEPPHGACLALsDR	TGGT1_293190;S74	NaN	1.04342	0.959084	0.886836	0.849521	0.000209823	0.934714
hypothetical protein	ASALCAQsREAsDGGDRDGDVR	TGGT1_206670;S688;;S692	NaN	NaN	0.886076	0.917601	1.00051	0.00133027	0.934729
AP2 domain transcription factor AP2VIIa-4	SsLSPTSLAADILAQLQSASR	TGGT1_203710;S2535	NaN	NaN	1.34438	0.851351	0.608479	0.0496774	0.934737
calcium-dependent protein kinase CDPK3	GTGsPDTKR	TGGT1_305860;S49	NaN	0.884072	0.809828	0.943676	1.10185	0.000634226	0.934857
translin family protein	APSAGASEtAKNEIDAR	TGGT1_226720T26	NaN	NaN	0.839286	0.977948	0.987361	0.00261135	0.934865
hypothetical protein	HSAANHsQQsDLNVPGFSGR	TGGT1_308860;S194;;S197	NaN	NaN	0.827632	0.832969	1.14418	0.0122957	0.934927
hypothetical protein	ADVQTGDDISFLLEEERDDKsAEALFK	TGGT1_217530;S568	NaN	NaN	1.06047	0.954827	0.790057	0.00700528	0.935118
hypothetical protein	DWHSLsDAsMDAGR	TGGT1_214600;S2226;;S2229	NaN	NaN	1.08276	0.885214	0.837438	0.00638592	0.935137
transducin beta-like protein TBL1	YAPAAAsPSHLVK	TGGT1_309140;S128	NaN	0.835308	1.02876	1.09301	0.783564	0.00109069	0.93516
hypothetical protein	HVLASGGEsRGGEPASETETR	TGGT1_243460;S1834	NaN	NaN	0.921625	0.993161	0.891023	0.00104542	0.93527
hypothetical protein	SGGVGGAPAPGsGAAGPAGDDASR	TGGT1_297430;S201	NaN	NaN	0.834094	1.03416	0.93832	0.0037917	0.935525
AMP deaminase	RGDsEGDPDDAK	TGGT1_234280;S1139	1.06755	NaN	0.930163	1.03625	0.708385	0.00140557	0.935588
RNA recognition motif-containing protein	KVtPPASK	TGGT1_291930T235	NaN	0.74217	1.00165	0.832921	1.1659	0.00213741	0.93566
putative P-type ATPase4	LLPASSsMSLAPGMGYENVETEVIDR	TGGT1_278660;S119	NaN	NaN	0.897827	0.906933	1.00251	0.00127765	0.935757
hypothetical protein	QSVAsPASR	TGGT1_223760;S143	NaN	NaN	0.867804	0.937871	1.00163	0.00170128	0.935768
hypothetical protein	AFVsDEASYR	TGGT1_254300;S894	NaN	0.96976	0.897309	0.975956	0.900134	2.64962e-05	0.93579
guanylyl cyclase	REtPREDDER	TGGT1_254370T570	NaN	NaN	0.881941	1.06316	0.862577	0.00462634	0.935893
hypothetical protein	EKEDsEAETAAASLLNLSK	TGGT1_234270;S587	NaN	NaN	0.966414	1.09449	0.746789	0.0115641	0.935898
PHD-finger domain-containing protein	GDLASAFFSGVLPsPGSSR	TGGT1_230890;S86	NaN	NaN	0.973523	1.06941	0.764903	0.00909819	0.935945
hypothetical protein	AGtLSGEDLLR	TGGT1_230000T412	NaN	NaN	0.971984	0.993222	0.842975	0.00250571	0.93606
bromodomain-containing protein	TAsGVHGEAVCVEEVPQR	TGGT1_263580;S346	NaN	NaN	1.16308	0.900835	0.744414	0.0166009	0.93611
putative microneme protein	KPAsGVPKPADPAGK	TGGT1_208730;S319	NaN	NaN	0.961641	0.948444	0.898313	0.000424329	0.936133
hypothetical protein	SSQAMLPFLPAFAAADSAsTR	TGGT1_306190;S236	NaN	NaN	0.870208	1.01583	0.923019	0.00205986	0.936352
putative LMBR1 family region protein	AISLsTFK	TGGT1_222200;S255	NaN	NaN	0.787715	0.791962	1.22945	0.0236275	0.936376
AP2 domain transcription factor AP2VIIa-4	STsLDSSLASSR	TGGT1_203710;S239	NaN	NaN	1.17147	0.927365	0.710308	0.0196415	0.936381
hypothetical protein	NsFDSRLtEGEVGGK	TGGT1_293360;S9; T15	NaN	NaN	0.879523	0.639893	1.28988	0.0387036	0.936432
putative protein c14orf29	RTsFSEGQR	TGGT1_271460;S538	NaN	NaN	0.959068	1.16886	0.68139	0.021981	0.936439
myosin C	AAtNFTCWTADCPAVK	TGGT1_255190T41	NaN	NaN	0.956	0.956541	0.896829	0.000447401	0.936457
putative DNA topoisomerase 2	AETSLFLLsDEESNSK	TGGT1_312230;S1498	NaN	0.928354	1.02726	1.01531	0.775276	0.000519316	0.93655
MIF4G domain-containing protein	SSHAECAtPSRR	TGGT1_269180T890	NaN	NaN	0.757757	0.972381	1.07952	0.0100485	0.936553
putative ATP-dependent hsl protease ATP-binding subunit hslU	GGAIPGLsFSLPIGIFGGGGQK	TGGT1_210730;S419	NaN	NaN	1.07138	1.01881	0.719512	0.0134154	0.936567
slc30a2 protein	REsCCEADRTTEAGEGR	TGGT1_251630;S448	0.597517	NaN	0.794537	0.789684	1.56477	0.0221696	0.936627
hypothetical protein	SFsPSTSDVSR	TGGT1_210700;S5485	NaN	NaN	0.96729	1.04744	0.795286	0.00624724	0.936672
hypothetical protein	AEGTEEEDADtAAR	TGGT1_237015T195	NaN	NaN	1.02721	0.989577	0.793913	0.00590474	0.9369
hypothetical protein	GRsGEHGAASGTR	TGGT1_306220;S518	0.995622	NaN	0.803184	0.989152	0.959806	0.000246537	0.936941
phospholipase, patatin family protein	ARHsKEGLDLSPR	TGGT1_254420;S159	NaN	NaN	0.97825	0.831081	1.00163	0.00323001	0.936987
Ulp1 protease family, C-terminal catalytic domain-containing protein	ETDSPDsPVGETASLFWEAER	TGGT1_214470;S300	NaN	NaN	1.10794	0.892528	0.810531	0.00884006	0.937
DHHC zinc finger domain-containing protein	GSGSAPPQAGMTSHSALsPR	TGGT1_278850;S54	NaN	1.18748	0.975531	0.813687	0.77135	0.00217332	0.937013
hypothetical protein	GLtDDEATLVGVEGGLGSPR	TGGT1_232080T2722	NaN	NaN	0.954151	1.00884	0.848333	0.00251786	0.937108
ATPase, AAA family protein	ADDVANQPVQLSSHGDsPDRIPK	TGGT1_235170;S102	0.902237	0.939108	0.883051	0.918768	1.04263	4.71261e-06	0.937159
pyridine nucleotide-disulfide oxidoreductase domain-containing protein	NALGNMsPEASCSMGAPGDPESQNIGSLSLDK	TGGT1_255890;S149	NaN	NaN	1.06776	1.1103	0.633714	0.0253926	0.937258
glycerol-3-phosphate-acyltransferase	EEGPSAESAAIPEAQtPELR	TGGT1_256980T233	0.687574	1.30528	0.904232	0.852208	0.93747	0.000764596	0.937352
Sin3-associated polypeptide SAP18	LPDATGHAsDEEQGQESGR	TGGT1_201400;S821	0.961035	1.08118	0.889153	0.910596	0.844842	2.07012e-05	0.937361
transcription elongation factor SPT6	RAAsGEQPSPR	TGGT1_308890;S1326	1.27323	NaN	0.808313	0.823702	0.84476	0.00359016	0.937501
hypothetical protein	QREEsQEPLR	TGGT1_306400;S1108	0.839203	0.663738	1.18177	1.20403	0.799545	0.000977223	0.937657
hypothetical protein	GVsLQGR	TGGT1_313270;S699	NaN	NaN	0.814268	0.975862	1.02316	0.00451686	0.937763
putative histone lysine methyltransferase, SET	RREsPEPVAGGR	TGGT1_201250;S794	NaN	NaN	1.16592	1.00484	0.643003	0.0261159	0.937921
hypothetical protein	GKAsQEAEEDGR	TGGT1_233160;S556	NaN	NaN	0.862141	0.913278	1.03836	0.0030998	0.937926
hypothetical protein	RPsGAAEGIAHVYANIK	TGGT1_203790;S254	NaN	NaN	1.0419	1.20358	0.568345	0.0389014	0.937942
hypothetical protein	EAsRDLPSSSR	TGGT1_267650;S1886	NaN	NaN	1.02484	0.957317	0.831702	0.00362019	0.937953
CCR4-Not complex component, Not1 protein	VGsDDGAGGVLALGGGR	TGGT1_291140;S976	NaN	1.24994	1.12447	0.921581	0.455996	0.0125726	0.937997
MIF4G domain-containing protein	AGASPVsPATK	TGGT1_269180;S1006	NaN	NaN	0.86663	0.994789	0.952614	0.00161229	0.938011
hypothetical protein	KSPAGGASSIDLSEsARR	TGGT1_257430;S1297	NaN	NaN	0.971042	0.917261	0.925802	0.000316296	0.938035
hypothetical protein	AAPsEVGsDSGGSLAGPLSLGFPVLR	TGGT1_232080;S5280;;S5284	NaN	NaN	0.821429	0.816798	1.17588	0.0156972	0.938036
Na+/H+ exchanger NHE3	VPTFASASsLPGFPGEK	TGGT1_305180;S1315	NaN	NaN	1.00804	0.950285	0.855947	0.00222531	0.938091
ribosomal protein RPL12	EILGTCNSVGCTVDGKsPK	TGGT1_254440;S147	NaN	NaN	1.04261	0.996546	0.775336	0.00764317	0.938164
hypothetical protein	SLLPGDKDPQsPLNR	TGGT1_234270;S1178	NaN	NaN	1.10726	1.04499	0.662385	0.0212761	0.938212
rhoptry kinase family protein ROP40 (incomplete catalytic triad)	GKGDEEAsGDEGASGGKEQPLGPPSGIPR	TGGT1_291960;S98	0.5953	1.16585	0.441892	0.421482	2.06715	0.0399615	0.938335
ribosomal protein RPL7A	VQKsPIFAK	TGGT1_261570;S37	NaN	NaN	0.934671	0.889189	0.99134	0.000989955	0.9384
hypothetical protein	GAsGGATPTEPAGVGESSGAEASGVAR	TGGT1_230000;S3595	0.587138	NaN	1.02573	0.988008	1.15289	0.00459791	0.938441
putative kinesin heavy chain	GGVPEADRDAsGK	TGGT1_273560;S998	NaN	NaN	0.996481	0.9909	0.828118	0.0034434	0.9385
hypothetical protein	SASLPSVEASPAsPR	TGGT1_248510;S3742	NaN	NaN	1.03344	0.928571	0.853553	0.00307533	0.938521
Sec7 domain-containing protein	RVMsSGK	TGGT1_312300;S1239	NaN	NaN	1.07075	0.963197	0.781628	0.00798452	0.938525
Sec23/Sec24 trunk domain-containing protein	YTRPPsEGAVPASGGEPSVR	TGGT1_226510;S267	NaN	0.680284	1.16868	1.0749	0.830457	0.00354326	0.93858
hypothetical protein	ASGGCLPASVSENAPEGSGDNPGEDEAVtPER	TGGT1_209500T2714	NaN	NaN	1.00479	1.05726	0.753695	0.00981481	0.938582
RNA recognition motif-containing protein	DIsVDREREETR	TGGT1_209850;S791	NaN	1.11525	0.881154	0.85319	0.90502	0.000562338	0.938654
alveolin domain containing intermediate filament IMC6	KEVPEAAITEQGFDIVsPPGTLR	TGGT1_220270;S333	NaN	1.06002	0.912848	0.852268	0.929709	0.000221087	0.938711
hypothetical protein	AGDASGGRVsPSSTSSK	TGGT1_228120;S3152	NaN	NaN	0.84477	0.982487	0.989005	0.0025004	0.938754
hypothetical protein	DEAVQLHQsVSAELEQAR	TGGT1_221390;S209	NaN	NaN	0.801265	1.34813	0.666968	0.045875	0.938788
phosphatidylinositol n-acetylglucosaminyltransferase	GAALLNDGsEEGDSR	TGGT1_280790;S1369	NaN	NaN	1.17249	0.868657	0.775342	0.0159207	0.93883
RNA recognition motif-containing protein	EAVFGPHGtASPR	TGGT1_320100T546	NaN	NaN	0.911133	0.951841	0.953831	0.000219492	0.938935
dense granule protein GRA3	KVEEELsLLRR	TGGT1_227280;S120	1.17374	0.747581	0.955276	0.938019	0.880075	0.000169768	0.938938
hypothetical protein	EGGARsDTDER	TGGT1_247450;S1039	0.94175	NaN	0.837152	1.07298	0.904004	0.000322373	0.938971
hypothetical protein	SDIGTHVPGKRsPPsPSPLQGPR	TGGT1_220240;S275;;S278	NaN	NaN	0.99157	0.92006	0.905379	0.000802891	0.939003
putative U2 small nuclear ribonucleoprotein family protein	ADPFsDGDLGAASR	TGGT1_205010;S126	NaN	NaN	1.04504	1.04183	0.730219	0.0121383	0.93903
MIF4G domain-containing protein	GRGDAPMAPESTDQQGSsQTQAVEK	TGGT1_269180;S1035	NaN	NaN	0.860642	0.925482	1.03105	0.00278476	0.939058
hypothetical protein	GREsEGGRGEK	TGGT1_214600;S3246	NaN	NaN	1.01054	0.992218	0.814599	0.00439772	0.939119
RNA recognition motif-containing protein	SQAAsPELER	TGGT1_320100;S580	NaN	NaN	0.899651	1.09348	0.824369	0.00720614	0.939167
hypothetical protein	HEsAGLK	TGGT1_275680;S188	NaN	NaN	1.05903	0.803269	0.955272	0.00619513	0.93919
hypothetical protein	MGGGGEGSGKEsGGFFGFFK	TGGT1_204340;S590	NaN	NaN	1.03568	1.01586	0.766169	0.00841791	0.939236
hypothetical protein	TASVARtIVDEIQDR	TGGT1_295360T194	NaN	NaN	0.811265	0.971946	1.03482	0.00498361	0.939344
hypothetical protein	TAANALSQELRsPADTLNPGR	TGGT1_203240;S59	NaN	NaN	0.862865	1.05775	0.897424	0.00406002	0.939346
alveolin domain containing intermediate filament IMC12	VSEAENDNASERAEsVDSMPQ	TGGT1_248700;S271	NaN	NaN	0.933459	0.946951	0.937631	1.80255e-05	0.939347
arginine decarboxylase	EDGFGsTGASGRPPWVGR	TGGT1_280700;S135	NaN	0.884831	0.843361	0.877487	1.15175	0.000947553	0.939357
hypothetical protein	ASSDLTVAGVsR	TGGT1_260520;S187	NaN	0.674676	1.00474	1.12368	0.954412	0.0022066	0.939377
hypothetical protein	RVAtPVSAQR	TGGT1_263320T160	NaN	1.40948	0.747621	0.72216	0.878832	0.00991592	0.939524
hypothetical protein	EREDLsPPR	TGGT1_264130;S356	0.754397	NaN	0.941482	0.931576	1.13105	0.00118177	0.939626
vacuolar transporter chaperone VTC2	AGsPGGLSRPR	TGGT1_298630;S881	0.861357	1.00723	0.877264	1.11623	0.837313	5.95347e-05	0.93988
[truncated: 4,231 more rows]

## Sheet: Supp Data 1.2
Supplementary Data 1.2: List of hyposphosphorylated sites identified upon depletion of TgCDPK7
Gene Id	Protein Description	Peptide_Sequence	Fold change (mutant/control)	T-test p-value	Protein_phosphosite	BR1_Normalised (Fold change)	BR2_Normalised (Fold change)	BR3_Normalised (Fold change)	BR4_Normalised (Fold change)	BR5_Normalised (Fold change)
TGGT1_200360	hypothetical protein	LGRPGDsPGYYVEAK	0.647126	0.0424165	TGGT1_200360;S72	NaN	0.244263	0.407072	0.906337	1.03083
TGGT1_200360	hypothetical protein	VPPTRSSAtR	0.708628	0.016467	TGGT1_200360;T93	0.887537	NaN	0.371714	0.569431	1.00583
TGGT1_201250	putative histone lysine methyltransferase, SET	SsPSSSDLLLVTQQLER	0.708584	0.00566726	TGGT1_201250;S592	NaN	NaN	0.81415	0.671655	0.639946
TGGT1_201390	hypothetical protein	AAVVsGLANENGLWR	0.704194	0.0122377	TGGT1_201390;S51	NaN	0.695591	0.344583	0.841446	0.935157
TGGT1_201400	Sin3-associated polypeptide SAP18	SGPGAFWGsGDR	0.741542	0.0153103	TGGT1_201400;S389	NaN	NaN	0.764986	0.889309	0.570332
TGGT1_201760	hypothetical protein	SLtPRPAYERPPAGVPSSSGR	0.758889	0.00161019	TGGT1_201760;T177	NaN	NaN	0.705746	0.759565	0.811356
TGGT1_202620	hypothetical protein	GCLVHSELRPSIILIHSGsDRDGSGK	0.555789	0.0004305	TGGT1_202620;S219	NaN	0.594691	0.622553	0.480353	0.525557
TGGT1_202850	ATP-binding domain-containing protein	GFsPADPCLR	0.56995	0.000532817	TGGT1_202850;S563	NaN	NaN	0.567202	0.593996	0.548653
TGGT1_202900	zinc finger (CCCH type) motif-containing protein	ICSAGGLEsPLASR	0.716868	0.0111774	TGGT1_202900;S1134	NaN	NaN	0.604027	0.683981	0.862595
TGGT1_202900	zinc finger (CCCH type) motif-containing protein	SVsPSDSGGHR	0.745863	0.0077194	TGGT1_202900;S31	0.86978	NaN	0.53336	0.568311	1.012
TGGT1_202900	zinc finger (CCCH type) motif-containing protein	SLQsDPEGERDTSR	0.72115	5.33601e-05	TGGT1_202900;S896	0.769115	NaN	0.675089	0.740288	0.700109
TGGT1_203220	DEAD/DEAH box helicase domain-containing protein	SRAsPPRK	0.660562	0.00205016	TGGT1_203220;S958	NaN	NaN	0.679654	0.601837	0.700196
TGGT1_203310	dense granule protein GRA7	ASVEsQLPR	0.698072	0.0250817	TGGT1_203310;S80	NaN	0.28339	0.90236	1.02714	0.579399
TGGT1_203380	DnaJ domain-containing protein	SsPHSAK	0.600859	0.0225427	TGGT1_203380;S179	NaN	NaN	0.508571	0.509601	0.784404
TGGT1_203380	DnaJ domain-containing protein	QsSWTPDELSLLAK	0.748046	0.0128377	TGGT1_203380;S545	NaN	NaN	0.806429	0.858198	0.579511
TGGT1_203910	TBC domain-containing protein	TTsPDDTLR	0.728494	0.0192293	TGGT1_203910;S319	NaN	NaN	0.794989	0.86319	0.527302
TGGT1_204410	endonuclease/exonuclease/phosphatase family protein	TAsSPGGAK	0.462112	0.00261462	TGGT1_204410;S988	NaN	NaN	0.496809	0.472669	0.416858
TGGT1_205130	hypothetical protein	VDsLPSLVR	0.591578	0.00971527	TGGT1_205130;S4309	NaN	0.302237	0.741307	0.70989	0.612878
TGGT1_205500	hypothetical protein	KPSGDEDAsDLESTLDETEAR	0.674717	0.0491263	TGGT1_205500;S635	NaN	0.058767	0.880978	0.765957	0.993164
TGGT1_205580	nuclear factor NF4	TAGADAAGAsAK	0.658679	0.0017241	TGGT1_205580;S475	NaN	NaN	0.667961	0.607291	0.700784
TGGT1_208010	hypothetical protein	ESPHtDDEEPDPR	0.722932	0.0082099	TGGT1_208010;T267	NaN	NaN	0.775946	0.591904	0.800946
TGGT1_208970	RNA recognition motif-containing protein	FSRsPDRR	0.750564	0.0163995	TGGT1_208970;S277	NaN	NaN	0.742035	0.586429	0.923227
TGGT1_209210	hypothetical protein	GLsREEERR	0.750951	0.00389832	TGGT1_209210;S1016	NaN	1.02435	0.616183	0.681841	0.681429
TGGT1_211020	RNA recognition motif-containing protein	ALEEQVQKLDsDWDELQK	0.664436	0.00216576	TGGT1_211020;S79	NaN	NaN	0.650192	0.619351	0.723765
TGGT1_211040	Sec61beta family protein	sRGVPASSQGILR	0.702875	8.87372e-05	TGGT1_211040;S43	NaN	0.659167	0.760381	0.724859	0.667092
TGGT1_211350	CBS domain-containing protein	KAAsPPR	0.72008	0.0190689	TGGT1_211350;S943	NaN	NaN	0.908127	0.689394	0.562718
TGGT1_211680	protein disulfide isomerase	sFVWLDTDQFK	0.593665	0.0214094	TGGT1_211680;S274	NaN	NaN	0.529297	0.48345	0.768247
TGGT1_213060	WD domain, G-beta repeat-containing protein	AAPHAEsRDEMDLHR	0.587113	0.0145627	TGGT1_213060;S1381	NaN	NaN	0.667752	0.649351	0.444237
TGGT1_213392	surface antigen repeat-containing protein	RAGsPEAAGILQTPAYAAALK	0.72484	0.0167917	TGGT1_213392S493	NaN	NaN	0.815147	0.824711	0.534662
TGGT1_213900	regulator of chromosome condensation RCC1	KSAsAGVTVK	0.659843	0.00873026	TGGT1_213900;S1117	NaN	NaN	0.588618	0.607423	0.783487
TGGT1_214270	putative translation initiation factor IF-2	RGGLsSDEEFEAK	0.603319	0.038873	TGGT1_214270;S17	NaN	NaN	0.81374	0.60697	0.389247
TGGT1_214970	putative DNA replication licensing factor	GGVLDENVDYFQGsRELDLEER	0.758748	0.00847079	TGGT1_214970;S62	NaN	NaN	0.878691	0.762243	0.635309
TGGT1_215560	histone arginine methyltransferase PRMT5	GRAsQDDDEHRPGAAAEK	0.61283	0.0117435	TGGT1_215560;S384	NaN	NaN	0.52926	0.563896	0.745335
TGGT1_215950	hypothetical protein	VSSAPATAGDRGsEHGDRAETETVCGEGR	0.701767	0.037482	TGGT1_215950;S1570	NaN	NaN	0.684163	0.468864	0.952274
TGGT1_216930	cholinephosphate cytidylyltransferase	VTLtDRPLGVNFDESVEK	0.622934	0.0155868	TGGT1_216930;T258	NaN	NaN	0.762626	0.615883	0.490294
TGGT1_217440	HCNGP family protein	RVDsLTGR	0.715053	0.00403548	TGGT1_217440;S270	NaN	NaN	0.637534	0.795295	0.712329
TGGT1_217460	glutaminyl-tRNA synthetase (GlnRS)	GKsGEMVGQGAGVASEAVDGPDATTSVNFLK	0.575739	0.000577634	TGGT1_217460;S231	NaN	NaN	0.600851	0.553086	0.573279
TGGT1_217510	hypothetical protein	KHELEINTVQsILTTTPPLSVPESVIDSAASSPR	0.686246	0.00151933	TGGT1_217510;S81	NaN	NaN	0.657843	0.739771	0.661123
TGGT1_217530	hypothetical protein	DVPDSLRQsPALGTK	0.721118	0.00280327	TGGT1_217530;S218	NaN	0.493026	0.820397	0.734721	0.836329
TGGT1_217680	hypothetical protein	LETSGFNsDNEETLASSR	0.743079	0.00455166	TGGT1_217680;S1310	NaN	0.537582	0.91994	0.89492	0.619876
TGGT1_217680	hypothetical protein	GMEIsQTSK	0.747444	0.00719475	TGGT1_217680;S170	NaN	NaN	0.690332	0.677291	0.87471
TGGT1_217680	hypothetical protein	GGAGGEGRGsAKLEPVEAGPEAENPATR	0.759364	0.0055216	TGGT1_217680;S956	NaN	0.532777	0.751762	0.711155	1.04176
TGGT1_217680	hypothetical protein	APEtPEAILPEER	0.740096	0.0077524	TGGT1_217680;T1871	NaN	NaN	0.862034	0.63745	0.720804
TGGT1_218300	zinc finger (CCCH type) motif-containing protein	SRQDsLHAK	0.574821	0.000440299	TGGT1_218300;S310	NaN	NaN	0.558261	0.567901	0.598302
TGGT1_218300	zinc finger (CCCH type) motif-containing protein	LGVAGERGsR	0.731416	0.00140397	TGGT1_218300;S361	NaN	NaN	0.686522	0.781183	0.726542
TGGT1_218300	zinc finger (CCCH type) motif-containing protein	AGGNVPTSPVYEQLAACGAGVTtPVVNAADR	0.738527	0.00296645	TGGT1_218300;T52	NaN	NaN	0.74087	0.807152	0.66756
TGGT1_218520	microneme protein MIC6	GIEAAEASEVEVLVDLDsKTWD	0.725435	0.00880652	TGGT1_218520;S345	NaN	NaN	0.618568	0.853191	0.704545
TGGT1_219170	hypothetical protein	HEEEEAAsR	0.676127	0.0180563	TGGT1_219170;S130	NaN	NaN	0.579595	0.588519	0.860266
TGGT1_219460	hypothetical protein	RPVsPQGRPGR	0.643464	0.0226638	TGGT1_219460;S334	NaN	NaN	0.506297	0.589461	0.834633
TGGT1_219460	hypothetical protein	EVsPSRDNAEGR	0.727131	0.0214832	TGGT1_219460;S558	NaN	NaN	0.641688	0.597426	0.942278
TGGT1_220090	hypothetical protein	TSGCGsDKGASR	0.73225	0.0425011	TGGT1_220090;S161	NaN	NaN	1	0.737003	0.459747
TGGT1_220240	hypothetical protein	SDGKPsPGR	0.751654	0.0144204	TGGT1_220240;S392	NaN	0.335901	0.888303	0.772592	1.00982
TGGT1_220240	hypothetical protein	SPGSRLsLLK	0.742062	0.0268609	TGGT1_220240;S420	NaN	NaN	0.636986	0.599801	0.989399
TGGT1_220240	hypothetical protein	GPVAsPTGGLR	0.674843	0.00616033	TGGT1_220240;S431	NaN	0.411512	0.738145	0.673784	0.875932
TGGT1_220240	hypothetical protein	GLLPGPsRQPEQR	0.630842	0.0137674	TGGT1_220240;S456	NaN	0.292978	0.756586	0.628103	0.845701
TGGT1_220270	alveolin domain containing intermediate filament IMC6	GGSFVSQVGTESQVPRPAATDEQAEGSADAGDKQGsR	0.753655	0.0330631	TGGT1_220270;S432	NaN	NaN	0.628482	0.598272	1.03421
TGGT1_220360	FAD binding domain-containing protein	GHsRDADRADANAADSDR	0.721514	0.00764234	TGGT1_220360;S734	NaN	NaN	0.59508	0.77554	0.793922
TGGT1_221390	hypothetical protein	GIESFLTQEDtDEDNSVLSSFSR	0.739552	0.0051808	TGGT1_221390;T757	NaN	NaN	0.635501	0.77043	0.812726
TGGT1_221470	hypothetical protein	APtRDEGGANEHFKR	0.713571	0.00658346	TGGT1_221470;T363	NaN	NaN	0.625282	0.69206	0.82337
TGGT1_221610	ubiquitin carboxyl-terminal hydrolase	sKEFIAENK	0.746544	0.0052789	TGGT1_221610;S5	NaN	NaN	0.849384	0.664067	0.72618
TGGT1_221870	hypothetical protein	DTGHHsGDDTNETAK	0.650061	0.00285005	TGGT1_221870;S206	NaN	NaN	0.59534	0.714608	0.640235
TGGT1_224210	hypothetical protein	RAsPLPSTYR	0.758977	0.0157999	TGGT1_224210;S1053	NaN	NaN	0.623771	0.707185	0.945974
TGGT1_224260	PHD-finger domain-containing protein	VPGGFVFPLALQLAGGsPAGGQK	0.756825	0.0159373	TGGT1_224260;S4345	NaN	NaN	0.879293	0.825229	0.565953
TGGT1_225160	hypothetical protein	DAsWFLPNAR	0.653779	0.0120696	TGGT1_225160;S199	NaN	0.301368	0.735964	0.741107	0.836675
TGGT1_225160	hypothetical protein	VTHsQSEPHFGGPHAIEATLQAAR	0.72271	0.0248449	TGGT1_225160;S69	NaN	0.205357	0.902883	0.909585	0.873016
TGGT1_225690	hypothetical protein	LLVTSREEEtQRGPPTWAVVPTPTHR	0.681019	0.000333298	TGGT1_225690;T1768	NaN	NaN	0.675551	0.66274	0.704766
TGGT1_226380	hypothetical protein	TDPDKAQAsEEGR	0.686758	0.0178298	TGGT1_226380;S255	NaN	0.27391	0.805089	0.723731	0.944304
TGGT1_226380	hypothetical protein	DRDLPSLsMLYEQLK	0.658467	0.00750269	TGGT1_226380;S304	NaN	NaN	0.550636	0.746284	0.678481
TGGT1_226380	hypothetical protein	GLARVtPRPR	0.702645	0.011048	TGGT1_226380;T98	NaN	NaN	0.643257	0.614044	0.850633
TGGT1_226620	hypothetical protein	RQsAEASGLR	0.748992	0.00254449	TGGT1_226620;S1238	NaN	NaN	0.8	0.771938	0.675039
TGGT1_226900	hypothetical protein	ATDKEQPRsPTSGR	0.707518	0.00808738	TGGT1_226900;S200	NaN	NaN	0.709549	0.817368	0.595638
TGGT1_226910	Amylo-alpha-1,6-glucosidase	RAAHtGSDTERPENR	0.687637	0.0047046	TGGT1_226910;T846	NaN	NaN	0.750627	0.594944	0.717341
TGGT1_228150	hypothetical protein	ASVsLPYNLEK	0.710591	0.000301194	TGGT1_228150;S1753	NaN	0.787398	0.720448	0.72392	0.610599
TGGT1_229630	eIF2 kinase IF2K-A (incomplete catalytic triad)	GVGSSAVRDsGPR	0.743043	0.00380726	TGGT1_229630;S3676	NaN	NaN	0.726701	0.672843	0.829585
TGGT1_229640	hypothetical protein	SFYVVPGsEKR	0.745863	0.00331197	TGGT1_229640;S1059	NaN	NaN	0.831917	0.703875	0.701797
TGGT1_229640	hypothetical protein	LELAPIPGRADsDGR	0.690739	0.0250474	TGGT1_229640;S403	NaN	0.533576	0.513692	0.528598	1.18709
TGGT1_229640	hypothetical protein	SFDHEPALLGsAR	0.725895	0.00016043	TGGT1_229640;S420	0.805237	0.58523	0.697828	0.881458	0.659722
TGGT1_229640	hypothetical protein	IGTTETALSLLLAHADsSENPK	0.746895	0.00230223	TGGT1_229640;S715	NaN	NaN	0.747875	0.808579	0.684232
TGGT1_229640	hypothetical protein	VDDAKSsAR	0.704188	0.0112085	TGGT1_229640;S818	NaN	NaN	0.810198	0.743542	0.558824
TGGT1_229640	hypothetical protein	ETPKEtPKER	0.671113	0.022499	TGGT1_229640;T895	NaN	NaN	0.75543	0.79059	0.46732
TGGT1_229640	hypothetical protein	TQEAVKEtPKETPK	0.549553	0.0039608	TGGT1_229640;T907	NaN	0.646834	0.642587	0.552583	0.356209
TGGT1_229790	hypothetical protein	RVDsTGGEESGVGETVSLLR	0.753626	0.0110254	TGGT1_229790;S611	NaN	NaN	0.775714	0.605706	0.879458
TGGT1_230000	hypothetical protein	SVsGLEADGFATAGCR	0.750565	0.00223304	TGGT1_230000;S4666	NaN	NaN	0.724986	0.705944	0.820764
TGGT1_230160	hypothetical protein	LKSEAPLEETGKPKPEVDtLETSATR	0.754312	0.000595866	TGGT1_230160;T112	NaN	0.659546	0.889316	0.714078	0.75431
TGGT1_230690	LNS2 (Lipin/Ned1/Smp2) protein	GSsQGGLADSER	0.759642	0.000415743	TGGT1_230690;S1019	0.783277	NaN	0.641221	0.763027	0.851043
TGGT1_231640	alveolin domain containing intermediate filament IMC1	ALQQLHGtQEsVR	0.75571	0.00199462	TGGT1_231640;T62;S65	NaN	NaN	0.706092	0.740756	0.820283
TGGT1_232080	hypothetical protein	GREEEsSLSRR	0.726584	0.00545106	TGGT1_232080;S1030	NaN	NaN	0.677606	0.667976	0.834171
TGGT1_232080	hypothetical protein	AWsPAGSVPGFSATEPDSGVSFDAPGR	0.731812	0.0328852	TGGT1_232080;S3387	NaN	NaN	0.515927	0.983301	0.696208
TGGT1_232190	Sec7 domain-containing protein	RPAGGAEAPsGDLGSAFVANLQALK	0.625391	0.0153268	TGGT1_232190;S2573	NaN	NaN	0.578811	0.519149	0.778212
TGGT1_232260	hypothetical protein	QAQPPTLLPALPHsFR	0.694052	0.00144529	TGGT1_232260;S123	NaN	NaN	0.731486	0.643052	0.707617
TGGT1_232280	hypothetical protein	NESPESGHDAtAQRK	0.688565	0.0313638	TGGT1_232280;T209	NaN	NaN	0.529084	0.601796	0.934814
TGGT1_233130	nucleoside transporter protein	HPGVLSVANLDLStPESVSR	0.69031	0.0136139	TGGT1_233130;T31	NaN	NaN	0.818141	0.713638	0.539151
TGGT1_233130	nucleoside transporter protein	GPSSQMTVVTMLtPEELSK	0.698892	0.0168077	TGGT1_233130;T331	NaN	NaN	0.881904	0.619393	0.595378
TGGT1_233160	hypothetical protein	DESDRGPQQLsPSHQK	0.607153	0.0121868	TGGT1_233160;S60	NaN	0.288611	0.759269	0.764331	0.616402
TGGT1_234470	hypothetical protein	STAAGSQsPR	0.557745	0.0335604	TGGT1_234470;S228	0.988828	NaN	0.504103	0.304688	0.433361
TGGT1_235160	hypothetical protein	SYsGPIGR	0.505299	0.000232608	TGGT1_235160;S488	NaN	NaN	0.492114	0.518809	0.504973
TGGT1_235930	domain K- type RNA binding proteins family protein	GGYRDsRDAR	0.648066	0.00908714	TGGT1_235930;S561	NaN	NaN	0.539823	0.649084	0.755292
TGGT1_236530	DUF298 domain-containing protein	KHsFDLSR	0.69067	0.00689572	TGGT1_236530;S40	NaN	NaN	0.720312	0.77235	0.579349
TGGT1_236540	RNA recognition motif-containing protein	GGFDGFYHGGFNsGPMR	0.67241	0.000113894	TGGT1_236540;S270	NaN	0.664002	0.610814	0.682568	0.732256
TGGT1_236890	hypothetical protein	QtSMPTTHIGGLAGR	0.755358	0.040082	TGGT1_236890;T90	NaN	0.107505	0.907915	1	1.00601
TGGT1_236910	putative U2 snRNP auxiliary factor	RRsPsIQRPER	0.743228	0.0039129	TGGT1_236910;S224;S226	1.00171	NaN	0.626781	0.743682	0.600733
TGGT1_236970	SWI2/SNF2-containing PHD finger protein	GDNIsPK	0.701205	0.0151773	TGGT1_236970;S657	NaN	NaN	0.803562	0.772704	0.527348
TGGT1_238040A	protein disulfide-isomerase domain-containing protein	RHsGVLGYFSR	0.728105	4.02154e-05	TGGT1_238040A;S24	NaN	NaN	0.735788	0.719826	0.728701
TGGT1_239400	hypothetical protein	EAAEPHKEAsEAGARH	0.667442	0.00796668	TGGT1_239400;S1259	NaN	NaN	0.581222	0.63844	0.782664
TGGT1_239410	hypothetical protein	RPAsGGGSYPSSLGAGK	0.662152	0.000622462	TGGT1_239410;S2296	NaN	NaN	0.638058	0.693798	0.6546
TGGT1_239410	hypothetical protein	ALSATHsAEEEKEK	0.7446	0.00419989	TGGT1_239410;S2391	NaN	NaN	0.652281	0.765504	0.816014
TGGT1_239410	hypothetical protein	EREsEGGDTAEGKK	0.735614	0.0071761	TGGT1_239410;S2442	NaN	NaN	0.856302	0.704457	0.646082
TGGT1_239410	hypothetical protein	GAVKPFGLLSPGsGPDEK	0.720207	0.00460532	TGGT1_239410;S657	NaN	NaN	0.818048	0.677326	0.665247
TGGT1_240060	hypothetical protein	LPPASVIAHQLGAsAAVSAPGVSPSVGSAPSASPPVR	0.724887	0.00608652	TGGT1_240060;S803	NaN	NaN	0.826905	0.717204	0.630551
TGGT1_240220	hypothetical protein	KLEsPTLK	0.716738	0.00251664	TGGT1_240220;S1374	NaN	NaN	0.774096	0.725817	0.6503
TGGT1_240220	hypothetical protein	RRsIESDR	0.748568	0.00863629	TGGT1_240220;S1512	NaN	NaN	0.888554	0.675208	0.681942
TGGT1_240510	hypothetical protein	GSCLFPLSSSPVIPsPR	0.755037	0.00241554	TGGT1_240510;S837	NaN	NaN	0.806058	0.682688	0.776364
TGGT1_242700	hypothetical protein	TQAANsEEERTEK	0.756271	0.00135938	TGGT1_242700;S1153	NaN	NaN	0.778142	0.789815	0.700855
TGGT1_242700	hypothetical protein	AGEAGsQQTATREEEGSGEAERPLTSAATVR	0.71807	0.00175487	TGGT1_242700;S707	NaN	NaN	0.65847	0.740278	0.755461
TGGT1_242780	hypothetical protein	GAEEGDGsSGEKK	0.696737	0.0162335	TGGT1_242780;S2286	NaN	NaN	0.836099	0.725359	0.528754
TGGT1_244210	RNA polymerase-associated protein RTF1	KQDsGAGSFLMTTGTLLK	0.709739	0.0082552	TGGT1_244210;S475	NaN	NaN	0.701444	0.601727	0.826046
TGGT1_244470	hypothetical protein	VAARHsEEVK	0.745985	0.0357628	TGGT1_244470;S370	NaN	NaN	0.963788	0.802882	0.471284
TGGT1_244910	MIZ/SP-RING zinc finger domain-containing protein	TVAsPQVSTTASASQSAVPPVLTLTLFSDDIAGR	0.611335	0.0379152	TGGT1_244910;S1170	NaN	NaN	0.823261	0.612009	0.398734
TGGT1_246090	hypothetical protein	GGKDtPESEKVQNEQQQSAEER	0.733887	0.0038191	TGGT1_246090;T914	NaN	NaN	0.774775	0.783816	0.643069
TGGT1_246950	hypothetical protein	HSSADGEsGRR	0.740158	0.00784091	TGGT1_246950;S273	NaN	NaN	0.608833	0.795569	0.816071
TGGT1_247000	tetratricopeptide repeat-containing protein	AATEEsVHAVGSVVEVEDDQVKQER	0.646341	0.00344231	TGGT1_247000;S468	NaN	NaN	0.651987	0.577847	0.709188
TGGT1_247000	tetratricopeptide repeat-containing protein	EKEEKsGDEEHLLTEAEFLAFK	0.632896	0.0449678	TGGT1_247000;S708	NaN	NaN	0.845328	0.681818	0.371543
TGGT1_247450	hypothetical protein	RsPSPyRGGER	0.661934	0.00316896	TGGT1_247450;S132; Y136	NaN	NaN	0.61548	0.735826	0.634497
TGGT1_247450	hypothetical protein	sGGLASVVEAAK	0.670367	0.0034337	TGGT1_247450;S2234	NaN	NaN	0.683591	0.731001	0.596509
TGGT1_247450	hypothetical protein	GGSsRDYMDGR	0.671436	0.00952663	TGGT1_247450;S936	NaN	NaN	0.609288	0.803378	0.601643
TGGT1_247450	hypothetical protein	FGLGsVSR	0.754279	0.000683062	TGGT1_247450;S980	NaN	NaN	0.789474	0.752111	0.721253
TGGT1_247730	AP2 domain transcription factor AP2XII-5	HLVGGDGsPSLDR	0.715186	0.00525939	TGGT1_247730;S390	NaN	NaN	0.707592	0.629032	0.808935
TGGT1_248420	hypothetical protein	QGGRsGELVIK	0.697149	0.00667665	TGGT1_248420;S685	NaN	0.407845	0.875938	0.81033	0.694482
TGGT1_248700	alveolin domain containing intermediate filament IMC12	HAEKEAAVGsLAssPR	0.713712	0.00256264	TGGT1_248700;S246;S249;S250	0.888776	NaN	0.610665	0.5647	0.790707
TGGT1_249180	bifunctional dihydrofolate reductase-thymidylate synthase	TGDSGLPsPSVGKR	0.759423	0.00228977	TGGT1_249180;S67	NaN	NaN	0.703936	0.827986	0.746347
TGGT1_249260	putative cell-cycle-associated protein kinase CDK	SLDsEERESHPASR	0.721979	0.000569614	TGGT1_249260;S1153	NaN	NaN	0.709965	0.7	0.755973
TGGT1_249260	putative cell-cycle-associated protein kinase CDK	SLLFGVSLGsPVLGESR	0.624809	0.00150411	TGGT1_249260;S1741	NaN	NaN	0.670302	0.616667	0.587457
TGGT1_249260	putative cell-cycle-associated protein kinase CDK	SERAsLGREDR	0.737252	0.000379342	TGGT1_249260;S1821	NaN	NaN	0.764006	0.714815	0.732935
TGGT1_249580	hypothetical protein	GDSEQPRGsGDR	0.713943	0.001655	TGGT1_249580;S658	NaN	NaN	0.659826	0.722549	0.759455
TGGT1_249900	putative adenine nucleotide translocator	DFLAGGIsAGVSK	0.497335	0.0124785	TGGT1_249900;S34	NaN	NaN	0.511054	0.394068	0.586884
TGGT1_250340	centrin 2	ADsNGDGEISFEDFYAIMTK	0.655818	0.0283985	TGGT1_250340;S149	NaN	NaN	0.534247	0.551741	0.881467
TGGT1_250830	SAC3/GANP family protein	RESsKDLHAEK	0.72615	0.00297684	TGGT1_250830;S272	1.05122	0.932658	0.633469	0.492537	0.520866
TGGT1_251630	slc30a2 protein	VVAsPDLAEEEGVSPSR	0.703387	0.00222371	TGGT1_251630;S277	NaN	NaN	0.737464	0.636945	0.735751
TGGT1_253130	transporter, major facilitator family protein	KPAsPVTPSVETSIHSCVADSSDVK	0.751962	0.0459109	TGGT1_253130;S338	NaN	NaN	0.697115	1.06458	0.494191
TGGT1_253570	hypothetical protein	TQGSAsPGSAPK	0.71299	0.00871097	TGGT1_253570;S271	NaN	NaN	0.750231	0.805815	0.582923
TGGT1_253570	hypothetical protein	RSSsATAGSAGR	0.670196	0.0104756	TGGT1_253570;S294	NaN	NaN	0.697965	0.773624	0.538998
TGGT1_253750	PLU-1 family protein	LIVHQEADsADDRDEEEREER	0.756363	0.00161855	TGGT1_253750;S6560	0.822912	1.11601	0.653926	0.626719	0.562245
TGGT1_254470	hypothetical protein	AGTDGsAGSVYPTGFIFYYDR	0.756536	0.0199839	TGGT1_254470;S709	NaN	NaN	0.6693	0.972381	0.627926
TGGT1_254580	UDP-galactose transporter family protein	GVsPVAR	0.733147	0.00012594	TGGT1_254580;S13	NaN	NaN	0.717326	0.737136	0.74498
TGGT1_254580	UDP-galactose transporter family protein	HVTGAGPSSPFSNLSTTsGQDEAQSK	0.751262	0.00370651	TGGT1_254580;S39	NaN	NaN	0.818148	0.772185	0.663454
TGGT1_254580	UDP-galactose transporter family protein	EPAsPTAHGGENALK	0.741727	0.00181048	TGGT1_254580;S399	NaN	0.532669	0.817774	0.828113	0.788353
TGGT1_254870	hypothetical protein	LDsLLQAANALDR	0.575393	0.00279323	TGGT1_254870;S312	NaN	NaN	0.593172	0.516017	0.616991
TGGT1_254870	hypothetical protein	TFSLAsDSTDVLR	0.595512	0.00747681	TGGT1_254870;S328	NaN	NaN	0.554765	0.533426	0.698344
TGGT1_255340	tetratricopeptide repeat-containing protein	DTNTHVILPAAPPADLAVsPSR	0.587325	0.00731125	TGGT1_255340;S47	NaN	NaN	0.566586	0.683294	0.512095
TGGT1_255510	ankyrin repeat-containing protein	DAAEAAEANAsEKAEAK	0.735686	0.00516079	TGGT1_255510;S482	NaN	NaN	0.699942	0.667033	0.840084
TGGT1_256050	signal recognition particle 14kd protein	SSDVIQsPGNKR	0.701822	0.00862082	TGGT1_256050;S123	NaN	NaN	0.784382	0.748821	0.572263
TGGT1_256980	glycerol-3-phosphate-acyltransferase	AHTRGEsPAK	0.577344	0.0180042	TGGT1_256980;S244	NaN	NaN	0.555011	0.45387	0.72315
TGGT1_256980	glycerol-3-phosphate-acyltransferase	SAsAPLGMQNPPVLSILGNSTR	0.755217	0.000730581	TGGT1_256980;S278	NaN	0.877719	0.622272	0.774814	0.746062
TGGT1_257350	putative eukaryotic translation initiation factor	GSHsRDLDWDSLGGK	0.644711	0.00209034	TGGT1_257350;S30	NaN	NaN	0.633147	0.700637	0.600348
TGGT1_257350	putative eukaryotic translation initiation factor	AASAAsLPALEPSLSQPFGK	0.717379	0.00920916	TGGT1_257350;S389	NaN	NaN	0.611732	0.692448	0.847958
TGGT1_257350	putative eukaryotic translation initiation factor	SLPsGELDPEAIEEMQQLK	0.753891	7.59275e-05	TGGT1_257350;S614	NaN	0.773093	0.759777	0.684258	0.798436
TGGT1_257430	hypothetical protein	RLEsGEAPK	0.758008	0.000426013	TGGT1_257430;S1057	NaN	NaN	0.726834	0.776034	0.771155
TGGT1_257580	hypothetical protein	RHsDGQDSETR	0.730702	0.0215419	TGGT1_257580;S568	NaN	NaN	0.599383	0.645631	0.947092
TGGT1_258580	rhoptry protein ROP17	GPSPASDTAsESEPVSTEEAALLQKE	0.698243	0.0117644	TGGT1_258580;S592	NaN	NaN	0.651054	0.847716	0.59596
TGGT1_258660	rhoptry protein ROP6	VLEPETLEGSPALVPPAEtEEGTAAQIAEEMSK	0.733374	0.000745952	TGGT1_258660;T397	NaN	NaN	0.768944	0.73159	0.699588
TGGT1_260150	tetratricopeptide repeat-containing protein	GVAATPVVQPNTGsPR	0.705206	0.000313585	TGGT1_260150;S2801	NaN	NaN	0.719404	0.715909	0.680306
TGGT1_260150	tetratricopeptide repeat-containing protein	ADGDDEsGDDFVWLVTK	0.730578	0.00412781	TGGT1_260150;S386	NaN	NaN	0.807568	0.739042	0.645124
TGGT1_260540	alveolin domain containing intermediate filament IMC14	THTSVAYVGGTASVPQQVPIYQEAPVILsPR	0.691552	0.0109184	TGGT1_260540;S642	NaN	NaN	0.555603	0.714097	0.804955
TGGT1_260600	Pumilio-family RNA binding repeat-containing protein	KGsTPATTK	0.656987	0.0227629	TGGT1_260600;S1562	NaN	NaN	0.745345	0.769837	0.455779
TGGT1_261430	hypothetical protein	HQsPEARPSR	0.626867	0.00560436	TGGT1_261430;S805	NaN	NaN	0.593173	0.567482	0.719947
TGGT1_262980	hypothetical protein	LIDDGPVGWtSSTGGFSESLLGPPASQGR	0.685925	0.00237691	TGGT1_262980;T193	NaN	NaN	0.630393	0.746158	0.681223
TGGT1_263320	hypothetical protein	KPGtPTPR	0.700118	0.0019648	TGGT1_263320;T152	NaN	NaN	0.639893	0.71691	0.743552
TGGT1_263360	WD domain, G-beta repeat-containing protein	SDsGVSAGLR	0.709645	0.00777733	TGGT1_263360;S1293	NaN	NaN	0.689818	0.827232	0.611885
TGGT1_263360	WD domain, G-beta repeat-containing protein	sLDKVDFLGK	0.753467	0.00420019	TGGT1_263360;S1425	NaN	NaN	0.746646	0.841518	0.672238
TGGT1_263360	WD domain, G-beta repeat-containing protein	EKIDESIGsAAEESSR	0.738735	0.0408453	TGGT1_263360;S439	NaN	NaN	0.433307	0.85625	0.926648
TGGT1_264130	hypothetical protein	GGsDGGGTSGKK	0.729226	7.26337e-05	TGGT1_264130;S34	0.852299	0.795596	0.646531	0.624133	0.727569
TGGT1_264430	hypothetical protein	KDsGAKLPDHAK	0.745548	0.002706	TGGT1_264430;S638	NaN	NaN	0.784974	0.667827	0.783842
TGGT1_264690	putative cyclin 4	GAEHREDDsSSR	0.711212	0.0124442	TGGT1_264690;S458	1.05146	NaN	0.410853	0.665487	0.717051
TGGT1_265840	hypothetical protein	GLRSsSDEGDHGASPR	0.69017	4.97609e-06	TGGT1_265840;S1177	NaN	NaN	0.687117	0.692045	0.691347
TGGT1_266400	hypothetical protein	AFKsDEEWQTFVAATAEEVGSK	0.748316	0.00183021	TGGT1_266400;S132	NaN	NaN	0.721748	0.711066	0.812134
TGGT1_266800	putative integral membrane protein	ELtGDHKENHTNTSSDYVK	0.734306	0.00143978	TGGT1_266800;T54	NaN	NaN	0.710451	0.702562	0.789906
TGGT1_267330	fumarate hydratase	LPFSSLsPR	0.668654	0.0128934	TGGT1_267330;S173	NaN	NaN	0.552978	0.639324	0.813661
TGGT1_268770	dual specificity phosphatase, catalytic domain-containing protein	AWsPLSHSR	0.74764	0.000192365	TGGT1_268770;S879	NaN	NaN	0.737143	0.737395	0.768381
TGGT1_269180	MIF4G domain-containing protein	EVAsAGEAASVVELSQEVAEAAASTAAPSGPMTWAER	0.750087	0.0185059	TGGT1_269180;S1127	NaN	NaN	0.582471	0.939031	0.728758
TGGT1_269260	hypothetical protein	QADGGEtPR	0.728426	0.0118818	TGGT1_269260;T148	NaN	NaN	0.822698	0.793498	0.569082
TGGT1_270060	hypothetical protein	EQSDARPPsPR	0.669671	0.000140546	TGGT1_270060;S269	0.6979	0.491025	0.76814	0.682156	0.709136
TGGT1_270220	hypothetical protein	ASsMTTVSR	0.66269	0.0497636	TGGT1_270220;S1200	NaN	0.0444565	0.80119	0.932973	0.87214
TGGT1_271050	SAG-related sequence SRS34A	KLtTVLPGAVLTAK	0.725043	0.00995634	TGGT1_271050;T84	NaN	NaN	0.771764	0.58209	0.821274
TGGT1_271050	SAG-related sequence SRS34A	LTtVLPGAVLTAK	0.724365	0.000320823	TGGT1_271050;T85	NaN	NaN	0.74489	0.700344	0.727862
TGGT1_271990	hypothetical protein	GAEAEGALsEK	0.713246	0.00205937	TGGT1_271990;S421	NaN	NaN	0.739846	0.751152	0.648741
TGGT1_272030A	kelch repeat-containing protein	LVVAPSGLLGVRtPDGELQETAAGASK	0.68254	0.00664975	TGGT1_272030A;T69	NaN	NaN	0.571357	0.748894	0.72737
TGGT1_272520	hypothetical protein	LRsSPPQHQGVR	0.749371	9.05438e-06	TGGT1_272520;S55	NaN	NaN	0.753257	0.745446	0.749409
TGGT1_272600	adaptin c-terminal domain-containing protein	SSYAGSECsDDKR	0.719118	0.00985487	TGGT1_272600;S51	NaN	NaN	0.659775	0.635315	0.862265
TGGT1_272600	adaptin c-terminal domain-containing protein	ASSLFsPR	0.674332	0.0172884	TGGT1_272600;S855	NaN	NaN	0.54382	0.632653	0.846524
TGGT1_273070	putative GTPase activating protein for adp ribosylation factor	LAAFEDQAVVHLDsLK	0.693455	0.010038	TGGT1_273070;S471	NaN	NaN	0.79685	0.723514	0.56
TGGT1_273320	hypothetical protein	DTSTKNsPREEDDGR	0.678515	0.0438115	TGGT1_273320;S174	NaN	NaN	0.613909	0.462621	0.959016
TGGT1_273460	eukaryotic translation initiation factor 3 subunit 6 interacting protein	EEGAQVGHEEDDSLsPDSRFPVSPSNQASQNVEGEGLDDAALDR	0.708376	0.0301079	TGGT1_273460;S33	NaN	NaN	0.510119	0.941583	0.673425
TGGT1_274130	TBC domain-containing protein	GSVLLPSYVSVGsGNAK	0.752893	0.00916941	TGGT1_274130;S1895	NaN	NaN	0.797533	0.610925	0.85022
TGGT1_275440	dense granule protein GRA6	SEARGPsLEER	0.640792	0.00718863	TGGT1_275440;S118	NaN	0.478926	0.612884	0.549476	0.921881
TGGT1_275440	dense granule protein GRA6	IEEQGtRR	0.737846	0.000304658	TGGT1_275440;T128	0.733506	0.667971	0.888889	0.855646	0.543219
TGGT1_275490	hypothetical protein	LRsDDPFAGPASAASEEGASFFPLLSDR	0.679899	0.00652758	TGGT1_275490;S1721	NaN	NaN	0.790296	0.623656	0.625744
TGGT1_276170	phosphatidylinositol 3- and 4-kinase	ASsGKETR	0.618167	0.00391749	TGGT1_276170;S602	NaN	NaN	0.624011	0.548223	0.682266
TGGT1_276170	phosphatidylinositol 3- and 4-kinase	SEsGEALCAR	0.700672	0.0137964	TGGT1_276170;S724	0.841008	0.0367674	0.934037	0.814086	0.877463
TGGT1_278030	hypothetical protein	GFsPPVKR	0.706303	0.0200111	TGGT1_278030;S2181	NaN	NaN	0.625847	0.585232	0.907829
TGGT1_279100	hypothetical protein	GLMEsERK	0.682499	0.0362102	TGGT1_279100;S425	NaN	0.221087	0.723677	0.644313	1.14092
TGGT1_279320	hypothetical protein	ELsPTKDQHASPGR	0.736173	0.00929503	TGGT1_279320;S262	NaN	NaN	0.664699	0.879121	0.664698
TGGT1_280660	HECT-domain (ubiquitin-transferase) domain-containing protein	EsSVFAATSAARSR	0.651	0.0471024	TGGT1_280660;S6751	NaN	NaN	0.413826	0.620553	0.91862
TGGT1_280700	arginine decarboxylase	LAEMTAALsVATEEEFSGDREQTHGWLTK	0.63207	0.0433612	TGGT1_280700;S163	NaN	NaN	0.755843	0.780105	0.360262
TGGT1_282140	cwf21 protein	MDPEDtRSADRER	0.731821	0.020523	TGGT1_282140;T354	NaN	NaN	0.930014	0.700233	0.565217
TGGT1_283550	hypothetical protein	DVSHMHsGDAGPHR	0.758015	0.0134416	TGGT1_283550;S3601	NaN	NaN	0.702639	0.6396	0.931805
TGGT1_283550	hypothetical protein	GQAGSLCPGGIGSSGsGVR	0.664951	0.016932	TGGT1_283550;S3912	NaN	NaN	0.582991	0.571746	0.840115
TGGT1_283830	type I inorganic pyrophosphatase PPase	LVsGTEGEKDFR	0.737977	0.00688616	TGGT1_283830;S197	NaN	NaN	0.702285	0.65378	0.857865
TGGT1_284050	DEAD/DEAH box helicase domain-containing protein	GKDsDSGR	0.600485	0.000618383	TGGT1_284050;S1140	NaN	NaN	0.590568	0.581034	0.629852
TGGT1_284050	DEAD/DEAH box helicase domain-containing protein	SCsAEETK	0.731994	0.00319946	TGGT1_284050;S659	NaN	NaN	0.72776	0.662318	0.805905
TGGT1_286440	malic enzyme	KHDVDEELItDD	0.649938	0.046753	TGGT1_286440;T368	0.697755	0.602121	NaN	NaN	NaN
TGGT1_286450	dense granule protein GRA5	RAIQEEsKESATAEEEEVAEEE	0.656189	0.00259266	TGGT1_286450;S105	0.963209	0.418031	0.647469	0.485764	0.766474
TGGT1_286450	dense granule protein GRA5	DVGSGGDDsEGAR	0.716598	0.000479904	TGGT1_286450;S38	0.912962	0.488073	0.702443	0.703624	0.775887
TGGT1_286450	dense granule protein GRA5	GREQQQVQQHEQNEDRsLFER	0.703819	2.48773e-05	TGGT1_286450;S59	NaN	0.698199	0.739529	0.663934	0.713613
TGGT1_287170	hypothetical protein	AWWERPSAsPIR	0.626548	0.0198739	TGGT1_287170;S165	NaN	NaN	0.492234	0.590789	0.796621
TGGT1_289650	PEP-carboxykinase I	TQsSGSLKDSISFLEMLK	0.708656	0.00156647	TGGT1_289650;S101	NaN	0.813662	0.57721	0.822511	0.621242
TGGT1_289680	Ras-related protein Rab11	IHLDEERTDsQIR	0.752729	0.00496446	TGGT1_289680;S207	NaN	0.671325	0.706935	0.587227	1.04543
TGGT1_289970	hypothetical protein	AASASSSRPSANsPTSTSK	0.732402	0.0106841	TGGT1_289970;S197	NaN	NaN	0.638459	0.675192	0.883555
TGGT1_289970	hypothetical protein	LVIQNKPsTNVSVDR	0.723259	0.0179709	TGGT1_289970;S68	NaN	NaN	0.581699	0.675923	0.912155
TGGT1_290310	hypothetical protein	FQLLPVFSAVVPGTATESEDGVAAVsR	0.572111	0.0442086	TGGT1_290310;S1670	NaN	NaN	0.619297	0.760174	0.336862
TGGT1_290310	hypothetical protein	SFsPVSDSVDK	0.45931	0.0466409	TGGT1_290310;S1732	NaN	NaN	0.61597	0.496366	0.265595
TGGT1_290620	hypothetical protein	SRLEsEERQEGR	0.755321	0.011688	TGGT1_290620;S2136	NaN	NaN	0.798077	0.871745	0.59614
TGGT1_290720	putative vacuolar proton translocating ATPase subunit	SDLRPSsPLFESTASLSLLEAGTAGLSAR	0.721745	0.0298171	TGGT1_290720;S252	NaN	NaN	0.733154	0.936652	0.49543
TGGT1_291140	CCR4-Not complex component, Not1 protein	AAEEsETMSR	0.740416	0.00983151	TGGT1_291140;S1985	NaN	NaN	0.664238	0.668693	0.888317
TGGT1_291330	RNA recognition motif-containing protein	GFSSWTsQDHWEGR	0.724407	0.00312773	TGGT1_291330;S67	NaN	NaN	0.643228	0.762842	0.767151
TGGT1_291980	HECT-domain (ubiquitin-transferase) domain-containing protein	GARDEEsPARR	0.755579	0.0134068	TGGT1_291980;S1886	NaN	NaN	0.59853	0.763863	0.904343
TGGT1_294280	putative E3 ubiquitin-protein ligase	REsREEDSAPGK	0.7581	0.0224954	TGGT1_294280;S419	NaN	NaN	0.872523	0.875	0.526776
TGGT1_294360	putative ubiquitin specific protease 39 isoform 2	RAsLQEGSSLAEAAGAAK	0.702438	0.000888379	TGGT1_294360;S35	NaN	NaN	0.676684	0.686691	0.743939
TGGT1_295360	hypothetical protein	VSIQItPER	0.752973	0.00141663	TGGT1_295360;T105	NaN	NaN	0.696931	0.773303	0.788685
TGGT1_295850	cyclic nucleotide-binding domain-containing protein	DVQPSsPPPEKAPGK	0.578249	0.00847908	TGGT1_295850;S1579	NaN	NaN	0.663312	0.479254	0.592181
TGGT1_295850	cyclic nucleotide-binding domain-containing protein	AGsLDFSILSR	0.648823	0.0124395	TGGT1_295850;S2683	NaN	NaN	0.748364	0.691664	0.506442
TGGT1_295850	cyclic nucleotide-binding domain-containing protein	GESAAsLESLFR	0.534636	0.00501101	TGGT1_295850;S293	NaN	NaN	0.609965	0.48839	0.505553
TGGT1_295850	cyclic nucleotide-binding domain-containing protein	GVRDEPGENEsDLWR	0.633638	0.0111087	TGGT1_295850;S384	NaN	NaN	0.733769	0.661591	0.505553
TGGT1_295850	cyclic nucleotide-binding domain-containing protein	SAHAPDsPAESPTGAVASSTASSLHVGR	0.719588	0.0212204	TGGT1_295850;S873	NaN	NaN	0.929039	0.648649	0.581075
TGGT1_295850	cyclic nucleotide-binding domain-containing protein	AtSSPLPTGPGSQAGNEGEK	0.710412	0.0144211	TGGT1_295850;T1341	NaN	NaN	0.787116	0.538257	0.805864
TGGT1_295850	cyclic nucleotide-binding domain-containing protein	tPSKEEQSK	0.697987	0.00789959	TGGT1_295850;T1848	NaN	NaN	0.822345	0.62657	0.645047
TGGT1_297180	hypothetical protein	SHAERsFER	0.752836	0.00349503	TGGT1_297180;S771	NaN	NaN	0.750259	0.676866	0.831383
TGGT1_297210	hypothetical protein	GRsADGEGTAAGETEMHK	0.750069	0.0283475	TGGT1_297210;S2032	NaN	NaN	0.813769	0.934821	0.501618
TGGT1_297210	hypothetical protein	RRGsQTTQTETR	0.614562	0.0133134	TGGT1_297210;S2549	NaN	NaN	0.737864	0.616071	0.489752
TGGT1_297210	hypothetical protein	GQsREDERGEAEER	0.738186	0.0364348	TGGT1_297210;S3387	NaN	NaN	0.774934	0.96875	0.470874
TGGT1_297210	hypothetical protein	GRDRsDENVTEETLR	0.682571	0.00086988	TGGT1_297210;S890	NaN	NaN	0.72286	0.6625	0.662352
TGGT1_297210	hypothetical protein	QAVTSGVRtPEGGAGAR	0.717662	0.020053	TGGT1_297210;T3376	NaN	NaN	0.762577	0.869643	0.520766
TGGT1_297960A	rhoptry neck protein RON6	DQDHVDNAsADRQNAEAEGNEAK	0.758537	0.00149842	TGGT1_297960A;S814	NaN	NaN	0.742795	0.815463	0.717352
TGGT1_298610	GYF domain-containing protein	RDsGEGLLPDGEREQVAAQPQGAWQSQLNLAADSK	0.712335	0.000300653	TGGT1_298610;S1734	0.829692	0.877837	0.585043	0.589253	0.67985
TGGT1_298610	GYF domain-containing protein	GGTGGAsPsPTGSRPSLGSSSSR	0.665419	0.000268983	TGGT1_298610;S238;S240	0.748799	NaN	0.665122	0.660902	0.586852
TGGT1_298630	vacuolar transporter chaperone VTC2	ELGAEGDDFSsAGGK	0.658376	0.000290169	TGGT1_298630;S190	NaN	NaN	0.680254	0.643134	0.651741
TGGT1_299100	hypothetical protein	GDKESGDsDAGER	0.725433	0.0193667	TGGT1_299100;S556	NaN	NaN	0.772769	0.87441	0.529119
TGGT1_299100	hypothetical protein	SRtPPDAR	0.647744	0.00174234	TGGT1_299100;T1938	NaN	NaN	0.666053	0.68272	0.59446
TGGT1_301410	hypothetical protein	GHTsPAGVSPEDTVVEILDFVSR	0.710609	0.0386649	TGGT1_301410;S53	NaN	NaN	0.794355	0.907262	0.430211
TGGT1_304630	ATG C terminal domain-containing protein	KTLGRFsPPPSR	0.758623	0.0103926	TGGT1_304630;S3993	NaN	NaN	0.891797	0.762215	0.621856
TGGT1_304630	ATG C terminal domain-containing protein	DQGDGSLPAWFADCTSGtPPK	0.693896	0.0123919	TGGT1_304630;T2019	NaN	NaN	0.658279	0.843183	0.580226
TGGT1_304680	ubiquitin family protein	ADtPNSLGSPTATSSGEDKK	0.638447	0.0169368	TGGT1_304680;T429	1.03151	NaN	0.53429	0.531082	0.456902
TGGT1_304760	RNA recognition motif-containing protein	ERDsLPSSR	0.755568	0.0018833	TGGT1_304760;S611	0.963974	NaN	0.66112	0.652896	0.744284
TGGT1_304955T2667	serine/threonine specific protein phosphatase	SNVYPVELVCQtR	0.754132	0.0113248	TGGT1_304955T2667	NaN	0.356389	0.957841	0.859226	0.843073
TGGT1_304970	putative cell-cycle-associated protein kinase CDK	KLsGSHELPDAGTVGK	0.651239	0.00438611	TGGT1_304970;S37	NaN	NaN	0.572074	0.660537	0.721107
TGGT1_304970	putative cell-cycle-associated protein kinase CDK	RPASGsAEAIAK	0.696434	0.00384198	TGGT1_304970;S578	NaN	NaN	0.643898	0.782306	0.663097
TGGT1_304970	putative cell-cycle-associated protein kinase CDK	REPsREEETR	0.757001	0.00190328	TGGT1_304970;S588	NaN	NaN	0.731793	0.822565	0.716644
TGGT1_304970	putative cell-cycle-associated protein kinase CDK	RDDsERHEDGAR	0.732705	0.00266755	TGGT1_304970;S652	NaN	NaN	0.656956	0.767396	0.773762
TGGT1_305030	kinase, pfkB family protein	TQDTAGNVFEEREGsDDDWPSLSK	0.741629	0.0145173	TGGT1_305030;S277	1.16441	NaN	0.684299	0.604632	0.513177
TGGT1_305940	peptidyl-prolyl cis-trans isomerase, cyclophilin-type domain-containing protein	MQAPtPPK	0.755221	0.00692882	TGGT1_305940;T564	NaN	NaN	0.873782	0.733856	0.658025
TGGT1_306020	hypothetical protein	SGVAFSGSVYsGDK	0.623742	0.0482278	TGGT1_306020;S4991	NaN	NaN	0.651402	0.854996	0.364827
TGGT1_306020	hypothetical protein	AAsSSSIISSVFQDASDAR	0.559404	0.00100851	TGGT1_306020;S674	NaN	NaN	0.524299	0.57206	0.581852
TGGT1_306220	hypothetical protein	LTFESLTsPARDR	0.739813	6.0125e-05	TGGT1_306220;S510	NaN	0.696363	0.722624	0.801282	0.738983
TGGT1_306400	hypothetical protein	AsQSLSRDPSLEPK	0.725273	0.0125424	TGGT1_306400;S817	NaN	NaN	0.700155	0.597481	0.878182
TGGT1_306400	hypothetical protein	SVSVsPGPVR	0.74071	0.0013215	TGGT1_306400;S957	0.90412	NaN	0.651476	0.632242	0.775
TGGT1_306660	RNA pseudouridine synthase superfamily protein	IAAAADPGVFLLCPAALSSSLSSFAPsPR	0.755807	0.00526357	TGGT1_306660;S3121	NaN	NaN	0.825926	0.794264	0.647232
TGGT1_307810	hypothetical protein	GTSVAsGTSGNAQGAAASK	0.635405	0.00147847	TGGT1_307810;S71	NaN	NaN	0.663913	0.586724	0.655577
TGGT1_308860	hypothetical protein	AKsPGNLSPAAVAAGK	0.740454	0.000178902	TGGT1_308860;S635	NaN	0.656401	0.763158	0.809357	0.732902
TGGT1_308890	transcription elongation factor SPT6	RPPsFGLDAHADKPR	0.651127	0.00596446	TGGT1_308890;S1254	NaN	NaN	0.732029	0.663075	0.558276
TGGT1_309170	TAF7-like RNA polymerase II TAF7L	GAPLEDEDGAGsAVGIGGDLGISGAPLASGSGPGR	0.71592	0.0361364	TGGT1_309170;S564	NaN	NaN	0.60549	0.548465	0.993805
TGGT1_309720	hypothetical protein	GVsPLSTVAEER	0.714239	0.0108375	TGGT1_309720;S115	NaN	NaN	0.687572	0.855346	0.599799
TGGT1_309720	hypothetical protein	AREsPNKR	0.719043	0.00161628	TGGT1_309720;S822	NaN	NaN	0.721988	0.667505	0.767636
TGGT1_309720	hypothetical protein	EsLELPGFRDIDVSRTENLSGGR	0.679837	0.00471862	TGGT1_309720;S883	NaN	NaN	0.760229	0.597904	0.681377
TGGT1_310420	hypothetical protein	ESGSAASPEKPANPEPAVPAAPVEKKEsAVEQK	0.625073	0.00252816	TGGT1_310420;S41	0.754747	NaN	0.635567	0.440991	0.668986
TGGT1_311230	hypothetical protein	VsMSPAGVSVSPAGVATCPTGSTGR	0.699248	0.00600088	TGGT1_311230;S2916	NaN	NaN	0.642567	0.808041	0.647135
TGGT1_311230	hypothetical protein	ETGGETATVAsEGMGSR	0.757006	0.000241695	TGGT1_311230;S3301	0.850213	NaN	0.692526	0.70674	0.778544
TGGT1_311230	hypothetical protein	HRDsAAGSATGVDEAERR	0.759177	0.00355078	TGGT1_311230;S4559	0.967909	NaN	0.570268	0.652345	0.846187
TGGT1_311230	hypothetical protein	ETGGETAtVAsEGMGSR	0.719391	0.00188379	TGGT1_311230;T3298; S3301	NaN	NaN	0.75792	0.657469	0.742783
TGGT1_311470	rhoptry neck protein RON5	GGVDPTEIHEIVQsR	0.675761	0.00569827	TGGT1_311470;S172	NaN	0.403988	0.817399	0.794017	0.687638
TGGT1_311750	mago binding protein	KHGEKtPEEK	0.63427	0.0199557	TGGT1_311750;T141	NaN	NaN	0.769014	0.672766	0.46103
TGGT1_312190	hypothetical protein	GSVSGDsPK	0.736027	0.0111138	TGGT1_312190;S112	NaN	NaN	0.687402	0.63152	0.88916
TGGT1_312530	splicing factor, CC1 family protein	EWPsGSGYGR	0.745987	0.00252516	TGGT1_312530;S116	NaN	NaN	0.700422	0.820486	0.717052
TGGT1_313270	hypothetical protein	GAGQQSGAATADHsRsQSVR	0.674278	0.0052229	TGGT1_313270;S1055; S1057	NaN	NaN	0.737392	0.707471	0.577972
TGGT1_313270	hypothetical protein	EGEETAHAGEGGsRVR	0.713296	0.0167867	TGGT1_313270;S1729	NaN	NaN	0.727552	0.867816	0.544519
TGGT1_313670	adaptin n terminal region domain-containing protein	sLSSLGSGSFASLLSGR	0.704877	0.000755153	TGGT1_313670;S615	NaN	NaN	0.735762	0.709719	0.66915
TGGT1_313860	regulator of chromosome condensation (RCC1) repeat-containing protein	RPAsPEEAFGWKPVLLR	0.627833	0.0063804	TGGT1_313860;S1081	NaN	NaN	0.715084	0.627892	0.540524
TGGT1_314970	root hair defective 3 gtp-binding protein (rhd3) protein	QVLVAALSAVDGASAsPPR	0.705848	0.00964232	TGGT1_314970;S836	NaN	NaN	0.582785	0.710241	0.824518
TGGT1_315220	rhoptry protein ROP14	QANDRPEAEASLLDKDAGRDETLPFSAATDDSLDsPR	0.661487	0.00906928	TGGT1_315220;S448	NaN	0.410836	0.613157	0.681135	0.940821
TGGT1_318440	helicase associated domain (ha2) protein	RIEGTGtPR	0.624969	0.00282447	TGGT1_318440;T1977	0.43005	NaN	0.644695	0.752277	0.672853
TGGT1_319550	putative membrane protein C17G8.08c	VLHRDGsQESGSTLWGR	0.728844	0.00205915	TGGT1_319550;S233	NaN	0.664955	0.586796	0.74	0.923623
TGGT1_320030	hypothetical protein	TPIEAEIIItPPRK	0.742289	0.00234614	TGGT1_320030;T600	NaN	NaN	0.729323	0.810138	0.687407
TGGT1_321520	hypothetical protein	CDWDKWIDsDDEDAK	0.742695	0.0059916	TGGT1_321520;S109	NaN	1.02763	0.753475	0.666041	0.523632
TGGT1_410360	putative transmembrane protein	LTPEELsQHSQR	0.591683	0.0153585	TGGT1_410360;S252	NaN	0.317072	0.471541	0.791541	0.786577
TGGT1_410370	putative transmembrane protein	APsEQQQPSESERPAGVPMKPGSLTLPFTCLGDTK	0.739279	0.0404124	TGGT1_410370;S142	NaN	0.126258	0.90069	0.820928	1.10924
TGGT1_410370	putative transmembrane protein	APSEQQQPSESERPAGVPMKPGSLTLPFtCLGDTK	0.698429	0.00340095	TGGT1_410370;T168	NaN	NaN	0.621349	0.713592	0.760346

## Sheet: Supp Data 1.3
Supplementary Data 1.3: List of hypersphosphorylated sites identified upon depletion of TgCDPK7
Gene Id	Protein Description	Peptide_Sequence	Protein_phosphosite	Fold change (mutant/control)	p-value	BR1_Normalised (Fold change)	BR2_Normalised (Fold change)	BR3_Normalised (Fold change)	BR4_Normalised (Fold change)	BR5_Normalised (Fold change)
TGGT1_316200	phosphoglycerate mutase family protein	MRsVEEETAAEEGKK	TGGT1_316200;S346	1.79178	0.0110142	NaN	NaN	2.14984	1.72093	1.50456
TGGT1_316200	phosphoglycerate mutase family protein	GMEAEsEREDGVR	TGGT1_316200;S334	1.47662	0.00197923	NaN	NaN	1.46971	1.36628	1.59387
TGGT1_289650	PEP-carboxykinase I	LAsLFVENFSNYTDR	TGGT1_289650;S653	1.52795	0.00178853	NaN	NaN	1.49947	1.65152	1.43287
TGGT1_289570	phosphatidylinositol transfer protein	LSsLLFAANK	TGGT1_289570;S1295	1.36294	0.0115408	NaN	NaN	1.63871	1.31674	1.13336
TGGT1_256980	glycerol-3-phosphate-acyltransferase	LHQALsAK	TGGT1_256980;S567	1.36072	0.00673478	NaN	NaN	1.57149	1.18846	1.3222
TGGT1_256760	pyruvate kinase PyK1	MsQILEPR	TGGT1_256760;S42	1.37801	0.0011431	NaN	1.28689	1.68869	1.36926	1.16719
TGGT1_256760	pyruvate kinase PyK1	QPQTLSAGAVEsGR	TGGT1_256760;S16	2.25175	0.0125114	NaN	NaN	1.99399	2.001	2.76025
TGGT1_244150	glycerate kinase	LDsWLETEEGK	TGGT1_244150;S40	1.55312	0.0287736	NaN	NaN	1.88046	1.75985	1.01904
TGGT1_239250	putative diacylglycerol kinase	GSEAQtGDEVDSGEAAGK	TGGT1_239250;T901	1.36107	0.00147901	NaN	NaN	1.38636	1.26034	1.4365
TGGT1_239250	putative diacylglycerol kinase	GDGsDNPPVDPGGK	TGGT1_239250;S468	1.62154	0.00218776	NaN	NaN	1.60164	1.76194	1.50104
TGGT1_239250	putative diacylglycerol kinase	EAEsGEDPLANEATR	TGGT1_239250;S413	1.34318	0.00261374	NaN	NaN	1.22601	1.33927	1.46426
TGGT1_239250	putative diacylglycerol kinase	AAEEDDDsVDRPFAGSSQR	TGGT1_239250;S1465	1.44169	0.00785678	NaN	NaN	1.27462	1.69446	1.356
TGGT1_239250	putative diacylglycerol kinase	YSsHDVGR	TGGT1_239250;S1122	1.44813	0.00256585	NaN	NaN	1.30114	1.52069	1.52255
TGGT1_236040	fructose-1,6-bisphosphate aldolase	GLETLPLtDDEKATMGLDGLSER	TGGT1_236040;T188	1.84201	0.0104389	NaN	NaN	2.21705	1.60494	1.70405
TGGT1_236040	fructose-1,6-bisphosphate aldolase	YGGGAGGAAAAsSLFEKR	TGGT1_236040;S424	1.56857	0.0273898	NaN	NaN	1.20465	1.41667	2.08439
TGGT1_236040	fructose-1,6-bisphosphate aldolase	SPsGVPMVDLLK	TGGT1_236040;S159	1.34143	0.0147641	NaN	NaN	1.58605	1.41049	1.02775
TGGT1_236040	fructose-1,6-bisphosphate aldolase	RFDsIGVENTEANR	TGGT1_236040;S116	2.26501	0.00148465	NaN	1.86184	2.39845	2.76389	2.03584
TGGT1_230940	hypothetical protein	ASLLGAVKsPR	TGGT1_230940;S360	2.10455	0.0125379	NaN	1.45012	2.51343	3.00402	1.45062
TGGT1_230490	phosphatidylinositol-4-phosphate 5-kinase	RVDsNSSRPPGSPK	TGGT1_230490;S871	1.44052	0.00662245	NaN	NaN	1.28731	1.3621	1.67216
TGGT1_230490	phosphatidylinositol-4-phosphate 5-kinase	LRsAETTQR	TGGT1_230490;S790	1.47301	0.00716688	NaN	NaN	1.33371	1.3621	1.72323
TGGT1_230490	phosphatidylinositol-4-phosphate 5-kinase	KLsGNTAEEVPATSLTSR	TGGT1_230490;S470	1.41082	0.000446475	NaN	NaN	1.37786	1.38426	1.47035
TGGT1_230490	phosphatidylinositol-4-phosphate 5-kinase	SMsEVEGEDR	TGGT1_230490;S453	1.39067	0.00505884	NaN	NaN	1.34265	1.24781	1.58155
TGGT1_230490	phosphatidylinositol-4-phosphate 5-kinase	RQLsPDQLK	TGGT1_230490;S1113	1.72765	0.021369	NaN	NaN	1.43153	1.51254	2.23888
TGGT1_229360	transaldolase	VLGEPTEsVEAsDAEDEKKLEMDEK	TGGT1_229360;S492;S496	1.57294	0.0163609	NaN	NaN	1.59471	1.91438	1.20974
TGGT1_229360	transaldolase	RVsAAHEGAAsPEAK	TGGT1_229360;S188;S196	1.4559	0.0126581	NaN	NaN	1.61344	1.62898	1.12527
TGGT1_228690	phosphatidylinositol 3- and 4-kinase	REsEREDASAR	TGGT1_228690;S4809	1.4188	0.00528186	NaN	NaN	1.35043	1.62224	1.28374
TGGT1_228690	phosphatidylinositol 3- and 4-kinase	KEGATEDEGEsGEESR	TGGT1_228690;S329	1.53176	0.00445263	NaN	NaN	1.38728	1.47792	1.73008
TGGT1_228690	phosphatidylinositol 3- and 4-kinase	AAAsYEAAR	TGGT1_228690;S1980	1.4774	0.00669433	NaN	NaN	1.3974	1.71609	1.3187
TGGT1_228690	phosphatidylinositol 3- and 4-kinase	SVsGQEAAEASR	TGGT1_228690;S1430	1.48533	0.00588071	NaN	NaN	1.40318	1.71136	1.34146
TGGT1_224480	putative cell-cycle-associated protein kinase CLK	FEsPHSTR	TGGT1_224480;S949	1.36355	0.0108168	NaN	NaN	1.18091	1.26432	1.64542
TGGT1_224480	putative cell-cycle-associated protein kinase CLK	REEREEsSR	TGGT1_224480;S1629	1.57749	0.0353715	NaN	NaN	1.11199	1.46929	2.15119
TGGT1_224480	putative cell-cycle-associated protein kinase CLK	sSLFPSVVLK	TGGT1_224480;S1232	1.64574	0.0125162	NaN	NaN	1.70311	1.93513	1.29898
TGGT1_224480	putative cell-cycle-associated protein kinase CLK	GGFLPFFYPsQR	TGGT1_224480;S1229	1.40454	0.00402341	NaN	NaN	1.24453	1.55349	1.41559
TGGT1_224480	putative cell-cycle-associated protein kinase CLK	APGGRDsRR	TGGT1_224480;S1019	1.50904	0.0133702	NaN	NaN	1.22598	1.4686	1.83254
TGGT1_211290	rhoptry protein ROP15	sLTDIHK	TGGT1_211290;S312	1.41522	6.51599e-06	NaN	1.42733	1.46701	1.38969	1.37687
TGGT1_203310	dense granule protein GRA7	LVPELtEEQQR	TGGT1_203310;T165	1.51712	0.0142072	NaN	2.38926	1.2522	1.32972	1.09728
TGGT1_356300	DNA-directed RNA polymerase I	FsPTQQTPR	TGGT1_356300;S505	1.44385	0.0408591	NaN	NaN	1.69345	1.79378	0.844314
TGGT1_321500	RNA recognition motif-containing protein	TMtEEEVR	TGGT1_321500;T149	1.43796	0.0120459	NaN	NaN	1.66511	1.51776	1.131
TGGT1_321500	RNA recognition motif-containing protein	LFIGSIPRtMTEEEVR	TGGT1_321500;T147	1.47181	0.00927413	0.845525	NaN	2.03037	1.5941	1.41725
TGGT1_321500	RNA recognition motif-containing protein	YAtGEAEK	TGGT1_321500;T117	1.47112	0.00847389	0.885565	NaN	1.93769	1.76417	1.29704
TGGT1_321500	RNA recognition motif-containing protein	MDsIAAADAAIR	TGGT1_321500;S87	1.40534	0.000887429	0.887746	1.73047	1.66978	1.53439	1.20431
TGGT1_321500	RNA recognition motif-containing protein	VPQsMEDAALRPIFEEFGEVK	TGGT1_321500;S47	1.72655	0.00678754	NaN	NaN	2.00623	1.53515	1.63827
TGGT1_321450	Myb family DNA-binding domain-containing protein	LGDGPSLAsTVAAATAVAASVGGVSPR	TGGT1_321450;S1365	1.43929	0.0459524	NaN	NaN	1.01546	1.2367	2.06572
TGGT1_320600	cold-shock DNA-binding domain-containing protein	NLAEGEsVEFR	TGGT1_320600;S132	1.62499	0.00247577	NaN	NaN	1.5536	1.78663	1.53473
TGGT1_320430	putative cell-cycle-control protein (translation regulation)	RsPDRESR	TGGT1_320430;S336	1.4095	0.0203308	NaN	NaN	1.21618	1.1948	1.81751
TGGT1_320430	putative cell-cycle-control protein (translation regulation)	RDRDDsADR	TGGT1_320430;S313	1.81688	0.00366342	1.01662	1.38596	2.3674	1.70118	2.61325
TGGT1_320080	hypothetical protein	GDGsPGHGAR	TGGT1_320080;S1057	1.5054	0.0268591	NaN	NaN	1.31449	1.19725	2.00447
TGGT1_320020	transporter, major facilitator family protein	TsYTGPMLPAGADVASELK	TGGT1_320020;S316	1.36848	0.000534923	NaN	1.54246	1.28824	1.16811	1.47512
TGGT1_318690	RNA recognition motif-containing protein	RHEGPEDGFFsPVTSPDNR	TGGT1_318690;S77	1.58832	0.0212137	NaN	NaN	1.82682	1.11815	1.82
TGGT1_318690	RNA recognition motif-containing protein	ATVSSDTISGADDSKsGDDEIDDLAWLR	TGGT1_318690;S404	1.48253	0.0290036	NaN	NaN	1.99112	1.30505	1.15143
TGGT1_318690	RNA recognition motif-containing protein	GKELDMFsDENIQK	TGGT1_318690;S154	1.39992	0.0185403	NaN	NaN	1.65364	1.02041	1.52571
TGGT1_318440	helicase associated domain (ha2) protein	FLLEEDLRQsR	TGGT1_318440;S326	1.50516	0.00742648	NaN	NaN	1.38736	1.36248	1.76564
TGGT1_318310	transketolase	VHGsPLSEEELR	TGGT1_318310;S294	1.51297	0.00658667	NaN	NaN	1.55792	1.70065	1.28033
TGGT1_316650	hypothetical protein	SQKPLsPVSQSPR	TGGT1_316650;S255	1.33335	0.000652667	1.56203	NaN	1.37264	1.14452	1.25419
TGGT1_315670	HEAT repeat-containing protein	LLHSDsGLFFSK	TGGT1_315670;S180	2.01734	0.0261626	NaN	NaN	1.56264	1.82357	2.66581
TGGT1_315270	hypothetical protein	ANtPPAGGsGDLGR	TGGT1_315270;T150;S156	1.39008	0.00395684	0.953175	NaN	1.63714	1.69113	1.27888
TGGT1_315270	hypothetical protein	ANTPPAGGsGDLGR	TGGT1_315270;S156	1.3696	0.000858655	NaN	NaN	1.38095	1.43279	1.29507
TGGT1_315210	putative rhoptry protein	VGFGAsIR	TGGT1_315210;S21	1.73457	0.0318802	NaN	NaN	1.67801	2.31033	1.21538
TGGT1_315110	prefoldin, alpha subunit protein	sPASLASLSLQQLVGVK	TGGT1_315110;S15	1.50206	0.00404398	NaN	NaN	1.46595	1.68309	1.35714
TGGT1_314780	myosin G	LEAETsLGDLLDQALQAK	TGGT1_314780;S983	1.6751	0.0283768	NaN	NaN	2.06138	1.85281	1.11111
TGGT1_313990	CBF/Mak21 family protein	ALPYLPVESFSsPLSAALR	TGGT1_313990;S793	1.59306	0.0345713	NaN	NaN	1.76446	1.00191	2.01282
TGGT1_312100	plasma membrane-type Ca(2+)-ATPase A1 PMCAA1	GVSsFAGIR	TGGT1_312100;S1782	1.42703	0.00142588	NaN	NaN	1.41793	1.33848	1.52468
TGGT1_311920	GRAM domain-containing protein	MLDSPLYEEERPEENAsEQSPASEK	TGGT1_311920;S2019	1.43517	0.00747453	NaN	2.09291	1.30017	1.14225	1.20536
TGGT1_311400	WD domain, G-beta repeat-containing protein	LGSSQsGPVDWSSEVGSLVR	TGGT1_311400;S798	1.3898	0.00798165	NaN	NaN	1.54895	1.477	1.14345
TGGT1_311230	hypothetical protein	KLTsVEK	TGGT1_311230;S3600	1.3867	0.00708021	NaN	1.83848	1.48985	1.39298	0.825506
TGGT1_310900	AP2 domain transcription factor AP2XI-2	SGNPSsLGGK	TGGT1_310900;S1507	1.34205	0.00887879	NaN	NaN	1.42105	1.51217	1.09293
TGGT1_310900	AP2 domain transcription factor AP2XI-2	VLASSAHWLSGDGGAVsPR	TGGT1_310900;S1141	1.45363	0.00308753	NaN	1.93046	1.42105	1.22823	1.23478
TGGT1_310670	putative glycogen phosphorylase 1	MRsFANDIPNK	TGGT1_310670;S902	1.48717	0.000984061	NaN	1.36412	1.79821	1.51068	1.27566
TGGT1_310630	hypothetical protein	LVSLFsLTR	TGGT1_310630;S443	1.37282	0.00138587	NaN	NaN	1.47453	1.31231	1.33162
TGGT1_310450	putative myosin heavy chain	LPsHSLFVR	TGGT1_310450;S58	1.46658	0.0114207	NaN	NaN	1.49436	1.72544	1.17993
TGGT1_310310	WD domain, G-beta repeat-containing protein	SLsGGASASPALLAPVAVLDEGKDTVSATAFSLDGR	TGGT1_310310;S187	1.44621	0.00274073	NaN	NaN	1.51412	1.52976	1.29474
TGGT1_310190	PIK3R4 kinase-related protein (incomplete catalytic triad)	GAsSGGASSGLSR	TGGT1_310190;S1403	1.43308	0.00674052	NaN	NaN	1.39042	1.25295	1.65588
TGGT1_310030	putative cyclase-associated protein	AGESTAtDSGTMAK	TGGT1_310030;T32	1.35366	0.00995766	NaN	NaN	1.62217	1.25809	1.18073
TGGT1_310030	putative cyclase-associated protein	AGEsTATDSGTMAK	TGGT1_310030;S29	1.53164	0.00201983	NaN	NaN	1.5082	1.66103	1.42569
TGGT1_310010	rhoptry neck protein RON1	sTSETPEAK	TGGT1_310010;S116	1.48024	0.00253582	0.663246	1.9773	1.49374	1.58285	1.68406
TGGT1_309810	ribosomal protein RPP2	VPsGGVAAAAAPAAGAADAGAGAAAK	TGGT1_309810;S69	1.45024	0.0027354	NaN	1.86609	1.40107	1.43584	1.09798
TGGT1_309560	nmda receptor glutamate-binding chain	VPsYYDPEIGGAAR	TGGT1_309560;S23	1.54618	0.00293565	NaN	2.06132	1.37451	1.41732	1.33156
TGGT1_309250	hypothetical protein	SSTsPESELLPSR	TGGT1_309250;S947	1.43459	0.00716041	NaN	1.88115	1.7339	1.10782	1.01547
TGGT1_309250	hypothetical protein	RLsVSSLQR	TGGT1_309250;S1585	1.40249	0.0104553	NaN	2.06265	1.20869	1.42628	0.91233
TGGT1_309220	GTPase activating protein for Arf protein	KKENLSEADCSGMsPR	TGGT1_309220;S213	1.34075	0.00292043	1.16442	NaN	1.34578	1.09317	1.75962
TGGT1_309220	GTPase activating protein for Arf protein	VQCFPSEEGNAsETSAEEAK	TGGT1_309220;S181	1.9461	0.0151076	NaN	NaN	1.80683	1.61439	2.41707
TGGT1_309210	putative peroxiredoxin 6	VMVQPTLtDEEAK	TGGT1_309210;T370	1.61138	0.00197574	NaN	NaN	1.75385	1.5547	1.52558
TGGT1_309190	hypothetical protein	ERFEAEsPTSDWR	TGGT1_309190;S716	1.38009	0.013843	NaN	2.11983	1.32624	1.2118	0.862494
TGGT1_309050	hypothetical protein	LATVMGLsEDEED	TGGT1_309050;S779	1.87214	0.0100488	NaN	NaN	2.22706	1.80781	1.58155
TGGT1_307990	arrestin (or s-antigen), n-terminal domain-containing protein	AAsAAALADDKGK	TGGT1_307990;S154	1.76732	0.014553	NaN	NaN	1.80052	2.12297	1.37846
TGGT1_306660	RNA pseudouridine synthase superfamily protein	LSsKVDFTEWK	TGGT1_306660;S2019	1.35213	0.0398866	NaN	NaN	1.84127	1.33811	0.877021
TGGT1_306600	RNA recognition motif-containing protein	DRNDRsPSR	TGGT1_306600;S176	1.43929	0.00253432	NaN	NaN	1.35182	1.38266	1.58338
TGGT1_306540	phosphotransferase enzyme family protein	SSSEAANSAASLSAVsPR	TGGT1_306540;S36	1.33144	0.000434349	NaN	NaN	1.38673	1.30816	1.29944
TGGT1_306330	phospholipase	TSEEEsAAAAK	TGGT1_306330;S567	1.4618	0.00745462	NaN	NaN	1.45719	1.2443	1.6839
TGGT1_305920	endonuclease III family 1 protein	TLPDPVAPPsPSR	TGGT1_305920;S391	1.55893	0.0037544	NaN	NaN	1.44046	1.48777	1.74855
TGGT1_305790	hypothetical protein	SATEGPEtPEKAPAVEDNAQPASSEDAK	TGGT1_305790;T455	1.4626	0.00133437	NaN	NaN	1.56522	1.38516	1.43743
TGGT1_305450	acetyltransferase, GNAT family protein	sLHADALQK	TGGT1_305450;S255	1.33865	0.0351204	NaN	NaN	1.50767	1.67582	0.832461
TGGT1_304650	histidine acid phosphatase superfamily protein	RAsPSASSPAsSPVPASPHTAGAPSAR	TGGT1_304650;S1759; S1767	1.55917	0.00727721	NaN	NaN	1.75576	1.61794	1.3038
TGGT1_301130	hypothetical protein	EFDTDAAPAFSSQTsQK	TGGT1_301130;S111	1.34132	0.000641733	NaN	1.55715	1.27807	1.39462	1.13543
TGGT1_300260	threonyl-tRNA synthetase family protein	NELSGsLTGLTR	TGGT1_300260;S523	1.88648	0.00127474	NaN	NaN	1.987	1.91405	1.75839
TGGT1_300150	hypothetical protein	tLSPSASPSSPALPVAGDAPR	TGGT1_300150;T332	1.47736	0.000417611	NaN	NaN	1.50258	1.51228	1.41722
TGGT1_300120	aminotransferase, class V superfamily protein	ASGSFAGEWGsFSDR	TGGT1_300120;S654	1.52684	0.012806	NaN	NaN	1.4	1.30876	1.87177
TGGT1_300120	aminotransferase, class V superfamily protein	SAsPGPLTSPATGYGESPEAGASAETR	TGGT1_300120;S481	1.37002	0.00790335	0.773397	0.705833	1.4271	1.86452	2.07925
TGGT1_299250	hypothetical protein	FGDAPFSLLPGLATETAFVGGPAtPEDR	TGGT1_299250;T84	2.64893	0.00994288	NaN	NaN	3.18099	2.37077	2.39502
TGGT1_299050	ribosomal protein RPL17	YAKEPsNENK	TGGT1_299050;S9	1.41983	0.00802895	NaN	NaN	1.38101	1.22011	1.65837
TGGT1_297830	hypothetical protein	RGGsEENEDEGEGR	TGGT1_297830;S720	1.41705	0.00165175	NaN	NaN	1.34208	1.37865	1.53043
TGGT1_297830	hypothetical protein	RSGsAEGASR	TGGT1_297830;S217	1.34104	0.02533	NaN	NaN	0.99235	1.28989	1.74087
TGGT1_297830	hypothetical protein	IDsFFEAR	TGGT1_297830;S156	1.55331	0.0179886	NaN	NaN	1.73989	1.7882	1.13185
TGGT1_297730	putative transcription elongation factor 1	RSPEASADEEGEAsEEDVPR	TGGT1_297730;S147	1.39041	0.0171148	NaN	NaN	1.62227	1.52258	1.02639
TGGT1_297060	phosphoglycerate mutase PGMII	FTGWTDVPLsPVGEQEAVEAAK	TGGT1_297060;S120	1.43654	0.000448983	NaN	NaN	1.39532	1.49597	1.41832
TGGT1_296010	phosphatidylinositol 3- and 4-kinase	LPGLSsPSSSALGSFASLVR	TGGT1_296010;S316	1.36631	0.00926198	NaN	NaN	1.42226	1.5625	1.11416
TGGT1_295650	hypothetical protein	EAtTTASDAEHEGFKGEETK	TGGT1_295650;T153	1.33488	0.00420522	NaN	NaN	1.45494	1.38354	1.16617
TGGT1_295420	hypothetical protein	APPDLLPAKsDDDLSLQMGDFDR	TGGT1_295420;S248	1.48688	0.00990738	NaN	NaN	1.67566	1.59241	1.19256
TGGT1_295360	hypothetical protein	sRsFVFSEEK	TGGT1_295360;S159;S161	1.36374	0.000206027	NaN	NaN	1.36696	1.39593	1.32834
TGGT1_295340	UV excision repair protein Rad23 protein	AVSQPAVSSSTAASAAPASAASPsPAETQR	TGGT1_295340;S99	1.38027	0.00215029	NaN	NaN	1.34044	1.50573	1.29464
TGGT1_294800BS298	putative elongation factor 1-alpha (EF-1-ALPHA)	EPGAGsKVTK	TGGT1_294800BS298	1.77541	0.0137695	NaN	NaN	2.19322	1.52155	1.61145
TGGT1_294630	hypothetical protein	KAsTVDER	TGGT1_294630;S329	1.53756	0.0100415	NaN	NaN	1.41299	1.35354	1.84615
TGGT1_294550	dynein heavy chain	SGsSVSAHGAQMVSPGFAR	TGGT1_294550;S2494	1.47441	0.000717222	NaN	1.77961	1.38903	1.3549	1.3741
TGGT1_294350	DEAD/DEAH box helicase domain-containing protein	ALLAGVEsDMAANEPLEAIEEFHAR	TGGT1_294350;S555	1.40116	0.0275729	NaN	NaN	1.58319	1.6903	0.929988
TGGT1_294280	putative E3 ubiquitin-protein ligase	ESSSVSASSVSNNPASAAVsPR	TGGT1_294280;S205	1.38709	0.0103316	NaN	NaN	1.27345	1.66949	1.21833
TGGT1_294250	WD domain, G-beta repeat-containing protein	GLsLVAQSSK	TGGT1_294250;S348	1.61855	0.000157518	NaN	1.71054	1.60113	1.43498	1.72754
TGGT1_294010	yrdC domain-containing protein	ASsSEEQK	TGGT1_294010;S89	1.68597	0.00206862	NaN	NaN	1.83957	1.60812	1.61023
TGGT1_294010	yrdC domain-containing protein	TAAMLSAGSAsPSGAVR	TGGT1_294010;S817	1.6376	0.00906094	NaN	NaN	1.86988	1.70432	1.33861
TGGT1_294010	yrdC domain-containing protein	LSPLPAsPLSTDECSAAQPR	TGGT1_294010;S542	1.52423	0.00962778	NaN	NaN	1.81996	1.4263	1.32643
TGGT1_293690	profilin PRF	sKGGAHLIK	TGGT1_293690;S119	1.50999	0.00213177	NaN	NaN	1.62382	1.383	1.52316
TGGT1_293360	hypothetical protein	MPsKATSPER	TGGT1_293360;S42	1.36182	0.000888126	NaN	1.48355	1.50319	1.39391	1.06663
TGGT1_293360	hypothetical protein	SMLRPsQIDLF	TGGT1_293360;S238	1.4319	0.0446209	NaN	NaN	1.39038	0.911647	1.99368
TGGT1_293180	NADP-specific glutamate dehydrogenase	NLSVVtPPELVTDDPGDMPDCKIsPR	TGGT1_293180;T100;S118	1.41867	0.0322864	NaN	NaN	1.79445	1.54527	0.9163
TGGT1_293180	NADP-specific glutamate dehydrogenase	NLSVVtPPELVTDDPGDMPDCK	TGGT1_293180;T100	1.33124	0.00634835	NaN	NaN	1.46043	1.41348	1.11982
TGGT1_293180	NADP-specific glutamate dehydrogenase	CQSEAsEVADPEEVDAFVK	TGGT1_293180;S126	1.4584	0.00141227	NaN	NaN	1.54779	1.46881	1.35859
TGGT1_292920	putative heat shock protein 75	TPAVVTGFLsSTLR	TGGT1_292920;S708	1.3758	0.00371596	NaN	NaN	1.44675	1.4724	1.20825
TGGT1_291590	hypothetical protein	GGSSAAsPALSPAVEELVSLNLDDLSR	TGGT1_291590;S11	1.38113	0.000121039	NaN	NaN	1.4083	1.35575	1.37934
TGGT1_290670	leucyl aminopeptidase LAP	AAAAFAsMLLR	TGGT1_290670;S364	1.68387	0.00647899	NaN	NaN	1.92087	1.68168	1.44907
TGGT1_290660	RNA recognition motif-containing protein	SPtMYQALIQFQSPDQAR	TGGT1_290660;T53	1.73872	0.00987264	NaN	NaN	2.0266	1.76427	1.42529
TGGT1_290660	RNA recognition motif-containing protein	HALMNLHsR	TGGT1_290660;S76	1.59541	0.0211058	NaN	NaN	2.01247	1.57651	1.19725
TGGT1_289320	putative casein kinase I	KIGsGSFGDIYK	TGGT1_289320;S38	1.38549	0.00453309	NaN	NaN	1.40934	1.21276	1.53436
TGGT1_288380	heat shock protein HSP90	SLtNDWEDPLAVK	TGGT1_288380;T294	1.47896	0.0366905	NaN	NaN	1.76079	1.77977	0.896321
TGGT1_286240	putative kelch repeat protein	GGGGSGAGsDSGGVDNEQK	TGGT1_286240;S608	1.46161	0.00946313	NaN	NaN	1.67874	1.51478	1.1913
TGGT1_286220	GDP-L-fucose synthetase	GEAsPEGPTIISAR	TGGT1_286220;S139	1.39967	0.00842562	NaN	NaN	1.15072	1.46355	1.58473
TGGT1_285650	hypothetical protein	EAsFSSLFPSLAASLTGPR	TGGT1_285650;S947	1.36541	0.00646818	NaN	NaN	1.25422	1.58611	1.25591
TGGT1_285650	hypothetical protein	TAsEEALR	TGGT1_285650;S1278	1.37158	0.00113021	NaN	NaN	1.39631	1.2822	1.43622
TGGT1_285250	hypothetical protein	RTDsTNSDQPLLLFSK	TGGT1_285250;S143	1.33523	0.00529308	NaN	NaN	1.4565	1.14228	1.4069
TGGT1_285210	hypothetical protein	SVEAAPLsPR	TGGT1_285210;S603	1.47354	0.0222186	NaN	NaN	1.90943	1.17072	1.34048
TGGT1_284780	hypothetical protein	KGsLYVLK	TGGT1_284780;S1430	1.6269	0.0216912	NaN	NaN	1.45359	2.10787	1.31925
TGGT1_284190	pyruvate carboxylase	AAIPGGAGsIAGAPEDLDLR	TGGT1_284190;S731	1.38529	0.00527412	NaN	NaN	1.18335	1.48162	1.49089
TGGT1_283510	hypothetical protein	SQPsRQTsR	TGGT1_283510;S54; S58	1.44121	0.00755698	NaN	NaN	1.29777	1.69237	1.3335
TGGT1_283510	hypothetical protein	DVWMTDRIsPK	TGGT1_283510;S21	1.38059	0.0268375	NaN	1.01034	2.37799	1.23312	0.900919
TGGT1_281580	putative PP2C	EKsLPVAVEEDDPIAAK	TGGT1_281580;S263	1.75579	0.00479085	NaN	NaN	1.834	1.91678	1.51658
TGGT1_280700	arginine decarboxylase	LPPETETVHVAVRPPTAGtPQLSEEKK	TGGT1_280700;T1164	1.55664	0.0465069	NaN	NaN	1.18946	1.22827	2.25218
TGGT1_280560	selenide, water dikinase	AsQIDLPR	TGGT1_280560;S393	1.35964	0.0276157	NaN	NaN	0.931373	1.42484	1.7227
TGGT1_280490	U-box domain-containing protein	DHDEPPQPSATTEGAAAEAAAAAAGAsPSR	TGGT1_280490;S821	1.73042	0.00142499	NaN	NaN	1.72145	1.62191	1.8479
TGGT1_280390	HEAT repeat-containing protein	VGEEsEDEGVFLHIR	TGGT1_280390;S1956	1.39428	0.0259014	NaN	NaN	1.22909	1.84656	1.10718
TGGT1_279450	putative adenylosuccinate synthetase	HLsNCHDIWAER	TGGT1_279450;S15	1.48745	0.00686952	NaN	NaN	1.67455	1.53466	1.25313
TGGT1_278830	glucose-6-phosphate 1-dehydrogenase	VVIGLSGGStPLPIYSALR	TGGT1_278830;T114	1.36264	0.000162417	NaN	NaN	1.32819	1.37604	1.3837
TGGT1_278660	putative P-type ATPase4	REsTVGGSGTGHSQLGK	TGGT1_278660;S83	1.49049	0.0005007	NaN	1.38885	1.54785	1.7194	1.30586
TGGT1_278540	hypothetical protein	GYTtPLLPER	TGGT1_278540;T88	1.33235	0.00518158	NaN	NaN	1.14797	1.37643	1.47264
TGGT1_278050	putative proteasome subunit alpha type 1	ELSTDEVQSLLDKLNAEsAGEDVQM	TGGT1_278050;S240	1.50035	0.00894943	0.881418	NaN	1.76493	2.00602	1.34903
TGGT1_278030	hypothetical protein	KRsGDESER	TGGT1_278030;S1194	1.43127	0.00679474	NaN	NaN	1.66796	1.29991	1.32593
TGGT1_277910	thrombospondin type 1 domain-containing protein	KANsGVAGR	TGGT1_277910;S1155	1.41932	0.0361548	NaN	NaN	1.17814	1.10711	1.97272
TGGT1_277870	hypothetical protein	MAtTPWSILNAPQR	TGGT1_277870;T511	1.35045	0.0399079	NaN	NaN	1.37397	0.857312	1.82008
TGGT1_277790	hypothetical protein	LFTGGAFAsFGR	TGGT1_277790;S106	1.4566	0.0168947	NaN	NaN	1.71739	1.56976	1.08266
TGGT1_277710	hypothetical protein	DGVLsEGDDFEK	TGGT1_277710;S389	1.33022	0.0213986	NaN	NaN	1.54895	1.50628	0.935436
TGGT1_277230	hypothetical protein	IAsQTQQPAK	TGGT1_277230;S374	1.48925	0.0383783	NaN	NaN	1.34821	1.05388	2.06566
TGGT1_275650	hypothetical protein	VHsGPLNK	TGGT1_275650;S436	1.37431	0.000595129	NaN	1.44773	1.50581	1.43299	1.11072
TGGT1_273960Y193	chaperonin GroS protein	SAGGVyLPIESK	TGGT1_273960Y193	1.43334	0.0247887	NaN	1.64767	1.91929	1.74542	0.420999
TGGT1_273370	putative coatomer gamma 2-subunit protein	QISsFTSEVSDTFK	TGGT1_273370;S421	1.4017	0.00193178	NaN	NaN	1.34773	1.52478	1.33258
TGGT1_272640	putative eukaryotic initiation factor-2B, epsilon subunit	LStLSSASLSVGELPSLLR	TGGT1_272640;T103	1.46437	0.012796	NaN	NaN	1.29958	1.29465	1.79887
TGGT1_272640	putative eukaryotic initiation factor-2B, epsilon subunit	QEGATGsPVSSSFAFTPDQTK	TGGT1_272640;S71	1.53261	0.0147519	NaN	NaN	1.42249	1.27589	1.89944
TGGT1_271430	hypothetical protein	SAsCEEVEDLGNQEGR	TGGT1_271430;S411	1.4079	0.00273604	NaN	NaN	1.41898	1.2749	1.52981
TGGT1_271360	hypothetical protein	GEDQAsVQAFESEK	TGGT1_271360;S274	1.33488	0.0327175	NaN	NaN	1.81906	1.00307	1.18251
TGGT1_271100	NUC153 domain-containing protein	DEAGDAsEEEAEDNELEEKEER	TGGT1_271100;S440	1.33097	0.00775843	1.03123	2.32995	1.42919	1.0553	0.809211
TGGT1_270530	ubiquitin fusion degradation protein UFD1CY	QSTSEADAAMNSEEEssEIDSAESDSSQR	TGGT1_270530;S221; S222	2.30243	0.0104862	NaN	NaN	2.5678	1.82826	2.51123
TGGT1_270450	MCM2/3/5 family protein	VAsEEDEGAR	TGGT1_270450;S853	1.42156	0.0131543	NaN	NaN	1.12707	1.4411	1.6965
TGGT1_270250	dense granule protein GRA1	ASDGSYSEVGNVNVEEVIDtMKSMQR	TGGT1_270250;T105	1.92505	0.0173493	NaN	NaN	2.02124	2.31408	1.43983
TGGT1_269700	NLI interacting factor family phosphatase	HAGHGFAAsGGPRPGGSSPGGLGGAGGNEGSGR	TGGT1_269700;S158	1.38556	0.0100617	NaN	NaN	1.1296	1.41506	1.61202
TGGT1_269330	hypothetical protein	LEsQFLALAESVEK	TGGT1_269330;S58	1.67377	0.0281076	NaN	NaN	2.19802	1.61275	1.21053
TGGT1_269290	hypothetical protein	AIIAsLGDMSLAR	TGGT1_269290;S1669	1.35394	0.0057654	NaN	NaN	1.54771	1.31887	1.19523
TGGT1_269180	MIF4G domain-containing protein	RSsHAECATPSR	TGGT1_269180;S884	1.33611	0.0384151	NaN	NaN	0.959717	1.18968	1.85893
TGGT1_269010	AP2 domain transcription factor AP2VIII-7	GSGSSSGGLGsPSGAVSQDIFSR	TGGT1_269010;S498	1.51648	0.0357767	NaN	2.74594	1.00059	0.998273	1.32112
TGGT1_268950	hypothetical protein	VTGAATAVAESSETsEKDEK	TGGT1_268950;S494	1.3915	0.0352794	NaN	NaN	1.62488	1.69368	0.855927
TGGT1_268200	RNA recognition motif-containing protein	TMsEDELR	TGGT1_268200;S217	1.43868	3.75955e-05	1.33001	1.29842	1.69561	1.49368	1.37566
TGGT1_268200	RNA recognition motif-containing protein	VPHTVDEEALRPIFEsFGEVR	TGGT1_268200;S124	1.70438	0.000881988	NaN	NaN	1.80568	1.65459	1.65288
TGGT1_267855	hypothetical protein	TAsEAGDKGDEEEELK	TGGT1_267855;S2339	1.33658	0.0339194	NaN	NaN	1.83436	1.16277	1.01262
TGGT1_267750	hypothetical protein	VLSAVPAsEHGDEGAAR	TGGT1_267750;S1193	1.34126	0.0018343	NaN	NaN	1.25435	1.45	1.31944
TGGT1_267730	hypothetical protein	TLTsSLR	TGGT1_267730;S142	1.89683	0.0100398	NaN	NaN	1.70699	1.70367	2.27984
TGGT1_267730	hypothetical protein	SATETRPEAPAsSR	TGGT1_267730;S124	1.49565	8.41705e-05	NaN	1.622	1.49687	1.37525	1.48847
TGGT1_267650	hypothetical protein	RVsLEQQAFQK	TGGT1_267650;S1437	1.55416	0.00830008	NaN	2.25987	1.36016	1.49543	1.10117
TGGT1_267600	FHA domain-containing protein	DRERDsENER	TGGT1_267600;S526	1.34241	0.00093153	1.21566	NaN	1.58146	1.43439	1.13812
TGGT1_267480	putative tRNA (guanine(26)-N(2))-dimethyltransferase	IMSsGNNEVFYNPVQVFNR	TGGT1_267480;S44	1.36443	0.0204628	NaN	NaN	1.08975	1.74937	1.25418
TGGT1_267100	protein phosphatase 2C domain-containing protein	TFsFGGSLGEGDKR	TGGT1_267100;S355	1.458	0.025675	NaN	1.53519	1.70317	2.12574	0.46792
TGGT1_266830	Sec7 domain-containing protein	SAsWDHNHQEK	TGGT1_266830;S3322	1.3353	0.00958693	NaN	NaN	1.07201	1.47303	1.46086
TGGT1_266830	Sec7 domain-containing protein	LDKGSGsAER	TGGT1_266830;S2987	1.35761	0.0276368	NaN	NaN	1.10685	1.14799	1.818
TGGT1_266090	hypothetical protein	WtNEHAPR	TGGT1_266090;T417	1.33757	0.0276157	NaN	NaN	1.25708	0.990863	1.76478
TGGT1_266080	hypothetical protein	NYHEFEENLKGsPAK	TGGT1_266080;S462	1.3775	0.0369491	NaN	NaN	1.77388	1.50297	0.855651
TGGT1_266080	hypothetical protein	SGASQSHREsGR	TGGT1_266080;S338	1.33057	0.00920201	NaN	NaN	1.1061	1.33432	1.55128
TGGT1_265850	hypothetical protein	LPLPPGDsEEDWPLFTR	TGGT1_265850;S1699	1.43895	0.000484903	NaN	NaN	1.39021	1.49843	1.42822
TGGT1_265520	hypothetical protein	YIDDGSQsEPSCDR	TGGT1_265520;S501	1.34981	0.00315054	0.892744	NaN	1.52221	1.43352	1.55075
TGGT1_265330Y211	putative cell-cycle-associated protein kinase GSK	RLVPGEQSVSyICSR	TGGT1_265330Y211	1.62741	0.00608688	NaN	NaN	1.79297	1.7127	1.37655
TGGT1_265310	putative heat shock protein 40	MHHAGsGsFGSR	TGGT1_265310;S146; S148	1.50894	0.00142649	NaN	NaN	1.42602	1.48251	1.61828
TGGT1_265250	RNA recognition motif-containing protein	RAsGAGPVsPR	TGGT1_265250;S592; S598	1.40143	0.00169481	NaN	NaN	1.36809	1.3223	1.5139
TGGT1_265010	glutamate 5-kinase domain-containing protein	AKsGGGQEEGEEISGK	TGGT1_265010;S544	1.47524	0.0184151	NaN	NaN	1.7242	1.62852	1.073
TGGT1_264900	hypothetical protein	GAsPSLSTFDGSGGRPR	TGGT1_264900;S650	1.48648	0.00906474	NaN	NaN	1.70174	1.54061	1.2171
TGGT1_264860	zinc finger, C3HC4 type (RING finger) domain-containing protein	QTETDEKEQsVEAASAEDR	TGGT1_264860;S2689	1.38391	0.00436198	NaN	NaN	1.33418	1.2559	1.56166
TGGT1_264190	hypothetical protein	AQQSGsEKEEFDEK	TGGT1_264190;S819	1.3597	0.0442442	NaN	NaN	1.78024	1.51007	0.788797
TGGT1_263850	hypothetical protein	GNSTDsDTPPSK	TGGT1_263850;S38	1.76201	0.01326	NaN	NaN	1.55054	1.56367	2.17183
TGGT1_263580	bromodomain-containing protein	VSGAsPVsSLPGASLAVSPFVPLFR	TGGT1_263580;S42; S45	1.33627	0.0117678	NaN	NaN	1.34205	1.58664	1.08011
TGGT1_263200	hypothetical protein	RFsFTSPSQTVASLLGK	TGGT1_263200;S729	1.44572	0.0226012	NaN	NaN	1.44245	1.83032	1.06439
TGGT1_263180	myosin D	AGsLIEGVESAGK	TGGT1_263180;S20	1.54623	0.0373818	NaN	NaN	1.50966	2.09644	1.0326
TGGT1_263150	tetratricopeptide repeat-containing protein	AEsLLNAFPPDFALALK	TGGT1_263150;S55	1.55523	0.0297029	NaN	NaN	1.50728	2.05229	1.10613
TGGT1_263050	ribosomal protein RPL13	GFtLEELK	TGGT1_263050;T218	1.5948	0.0132123	NaN	NaN	1.71634	1.83696	1.2311
TGGT1_263000	Beige/BEACH domain-containing protein	HPATSGLNTtSQQRSAAGSSYPAAGQSNR	TGGT1_263000;T1198	1.35322	0.0120303	NaN	NaN	1.30498	1.63338	1.1213
TGGT1_263000	Beige/BEACH domain-containing protein	SLsNLSSGALTSSLFSSGASTVR	TGGT1_263000;S224	1.73168	0.0108876	NaN	NaN	1.60835	1.49643	2.09027
TGGT1_262460	hypothetical protein	GAsFDFSALR	TGGT1_262460;S424	1.51652	0.00919739	NaN	NaN	1.70201	1.62008	1.22746
TGGT1_262460	hypothetical protein	LETHsDRVEQNAEASFSR	TGGT1_262460;S1803	1.41423	0.00421604	NaN	NaN	1.56779	1.24929	1.42562
TGGT1_262390	TLD protein	ALsPSLYQFLVMQSR	TGGT1_262390;S1145	1.35216	0.00542277	NaN	NaN	1.5449	1.3019	1.20968
TGGT1_261500	hydrolase	EALEDSQsPATEAVVEASR	TGGT1_261500;S390	1.52913	0.00872933	NaN	NaN	1.78279	1.51972	1.28488
TGGT1_260370	AtPH1 family protein	QMVRPSVMVNDSYGQDsD	TGGT1_260370;S129	1.48542	0.0255139	NaN	NaN	1.41672	1.105	1.93455
TGGT1_260200	helicase associated domain (ha2) protein	SSsPSYAPPR	TGGT1_260200;S203	1.43503	0.00818211	NaN	NaN	1.68635	1.37105	1.24769
TGGT1_259260	membrane protein FtsH1	VPVELPTESHEGTVsGFSTLVNAGDER	TGGT1_259260;S553	1.60899	0.00939081	NaN	NaN	1.85727	1.65142	1.31829
TGGT1_259200BS156	Na+/H+ exchanger NHE1	LLsPASSGLGLPR	TGGT1_259200BS156	1.41113	0.000446734	NaN	1.65422	1.29342	1.31452	1.38237
TGGT1_258970	hypothetical protein	DADsVAAGFLGGAK	TGGT1_258970;S1947	1.35512	0.006348	NaN	NaN	1.53603	1.36839	1.16093
TGGT1_258470	hypothetical protein	QLsVAFAESVETEEELKER	TGGT1_258470;S50	1.35065	0.0334615	NaN	NaN	1.67775	1.52251	0.851689
TGGT1_258470	hypothetical protein	EATPQSVsFLR	TGGT1_258470;S105	1.56511	0.00589279	NaN	0.929754	1.72817	1.96178	1.64072
TGGT1_257350	putative eukaryotic translation initiation factor	LRsLPsGELDPEAIEEMQQLKR	TGGT1_257350;S611;S614	1.52236	0.000754293	NaN	NaN	1.56145	1.56688	1.43875
TGGT1_257350	putative eukaryotic translation initiation factor	AQFAGLPAMPQSMsPQSQEGDAAK	TGGT1_257350;S453	1.80845	0.00656719	NaN	NaN	1.946	1.5141	1.96525
TGGT1_255420	hypothetical protein	GsVAENKTENAGIER	TGGT1_255420;S55	1.33836	0.00565117	NaN	0.99163	1.17861	1.32014	1.86304
TGGT1_255410	hypothetical protein	RKsQVHEPLIK	TGGT1_255410;S56	1.3345	0.00117537	NaN	1.08411	1.59879	1.39858	1.25651
TGGT1_255190	myosin C	KSsVVPFGR	TGGT1_255190;S29	1.75025	0.0105224	NaN	1.14174	1.97244	2.50158	1.38523
TGGT1_254730	POPLD (NUC188) domain-containing protein	SHDsDWEDLPDTAEVR	TGGT1_254730;S758	1.50929	0.0032597	NaN	NaN	1.68156	1.41184	1.43447
TGGT1_254420	phospholipase, patatin family protein	EGLDLsPR	TGGT1_254420;S166	1.53565	0.00892159	1.0622	2.79178	1.16675	1.50208	1.15543
TGGT1_254210	RNA recognition motif-containing protein	sLEGSYDERPLDRPR	TGGT1_254210;S9	1.77253	0.01922	NaN	NaN	1.79277	1.33089	2.19394
TGGT1_253820	hypothetical protein	DSsGGMFETSVQPQDTR	TGGT1_253820;S9	1.48827	0.000471877	NaN	NaN	1.51955	1.52166	1.4236
TGGT1_253820	hypothetical protein	RDsSGGMFETSVQPQDTR	TGGT1_253820;S8	1.63092	0.000913448	NaN	1.31664	1.58752	1.72281	1.89673
TGGT1_253820	hypothetical protein	KNVFSEGAPEEAsDQVMAPPVR	TGGT1_253820;S45	1.39456	0.0142702	NaN	2.03042	1	0.890279	1.65753
TGGT1_253750	PLU-1 family protein	KWGsVADETKR	TGGT1_253750;S4501	1.48735	0.0458529	NaN	NaN	1.76343	1.86837	0.83024
TGGT1_253730	importin-beta N-terminal domain-containing protein	LAAADVAQsKDLVEEVTDVQGSVQR	TGGT1_253730;S1005	1.67896	0.0189391	NaN	NaN	1.3117	1.61026	2.11492
TGGT1_251810	putative translation initiation factor eIF-5A	DDLMLPKDsEGNLDEVATQVK	TGGT1_251810;S121	2.01212	0.0104172	NaN	NaN	2.21264	2.2255	1.59821
TGGT1_251730	hypothetical protein	LLGsDGEKGEER	TGGT1_251730;S187	1.42508	0.00812158	NaN	NaN	1.65889	1.40353	1.21283
TGGT1_251690	putative seryl-tRNA synthetase, cytoplasmic	QRLPtIEAAATEAEEKR	TGGT1_251690;T92	1.35206	0.00160041	NaN	NaN	1.42591	1.38374	1.24652
TGGT1_251480	DEAD/DEAH box helicase domain-containing protein	AGEEHADGGsEDDGEAPDKVEASSAETK	TGGT1_251480;S423	2.0148	0.0132752	NaN	3.02319	1.74013	2.08866	1.20722
TGGT1_250820	hypothetical protein	VAAKPHLsHR	TGGT1_250820;S230	1.35548	0.00146914	NaN	NaN	1.39857	1.41593	1.25194
TGGT1_250770	putative eukaryotic initiation factor-4A	HDtIGQAQSGTGK	TGGT1_250770;T79	1.61477	0.00483241	1.06072	0.941646	2.32154	2.2202	1.52976
TGGT1_250770	putative eukaryotic initiation factor-4A	CHACVGGtVVR	TGGT1_250770;T145	1.76243	0.00667517	1	NaN	2.18864	1.90303	1.95805
TGGT1_250770	putative eukaryotic initiation factor-4A	GIDVQQVsLVINYDLPATK	TGGT1_250770;S348	1.9134	0.00479507	NaN	NaN	1.67738	1.92525	2.13756
TGGT1_250770	putative eukaryotic initiation factor-4A	GFKsQIYDVFK	TGGT1_250770;S200	1.71693	0.010097	NaN	2.57729	1.55949	1.49192	1.23902
TGGT1_249970	hypothetical protein	TAGGGsDIIQAASTASTAAASTAPAPAAAGAAASPGAAAPVPERPMR	TGGT1_249970;S32	1.37319	0.00928766	NaN	NaN	1.23432	1.24561	1.63965
TGGT1_249860	hypothetical protein	AVsASWGPR	TGGT1_249860;S291	1.40309	0.000266228	NaN	NaN	1.44838	1.38635	1.37455
TGGT1_249480	tetratricopeptide repeat-containing protein	sLESLPETTASDPVASEESK	TGGT1_249480;S248	1.44478	0.00240763	NaN	NaN	1.50641	1.30314	1.5248
TGGT1_249390	glutamate/leucine/phenylalanine/valine dehydrogenase family protein	ALPDVLVPGLMSIEtLR	TGGT1_249390;T1148	1.50347	0.0147701	NaN	NaN	1.82131	1.50782	1.18128
TGGT1_249390	glutamate/leucine/phenylalanine/valine dehydrogenase family protein	sLLGGRPVGK	TGGT1_249390;S156	1.49501	0.00655215	NaN	2.10837	1.42698	1.38601	1.05869
TGGT1_249320	flavodoxin domain-containing protein	AAVSsFSGEK	TGGT1_249320;S870	1.35726	0.00561503	NaN	NaN	1.18893	1.3412	1.54164
TGGT1_249180	bifunctional dihydrofolate reductase-thymidylate synthase	KTDDAATAEPSNAMSSLtSTR	TGGT1_249180;T270	1.43725	0.000448435	NaN	NaN	1.45528	1.47861	1.37787
TGGT1_249180	bifunctional dihydrofolate reductase-thymidylate synthase	STAAQAAAPAEsVFVPFCPELGR	TGGT1_249180;S208	1.95706	0.000936241	NaN	NaN	1.87299	1.92513	2.07307
TGGT1_248830	phosphoinositide phospholipase PIPLC	SRLPSAQSQEAPQPISEEtPR	TGGT1_248830;T714	1.46605	0.00169878	NaN	NaN	1.36222	1.57178	1.46415
TGGT1_248830	phosphoinositide phospholipase PIPLC	EGEEVsPLASLSR	TGGT1_248830;S645	1.67185	0.00249572	NaN	NaN	1.54963	1.83197	1.63396
TGGT1_248340	GTP-binding nuclear protein ran/tc4	HLtGEFEK	TGGT1_248340;T46	2.27356	0.0171329	NaN	NaN	2.54995	2.59946	1.67128
TGGT1_248340	GTP-binding nuclear protein ran/tc4	RLtNQPALSFVGEHAK	TGGT1_248340;T183	2.04114	0.000938648	NaN	NaN	2.15765	1.94329	2.02249
TGGT1_248290	WD domain, G-beta repeat-containing protein	RRPEEGFtDGEDR	TGGT1_248290;T1793	1.35712	0.0061984	NaN	NaN	1.56141	1.19781	1.31213
TGGT1_247760	AMP-binding enzyme domain-containing protein	QPGVVGRLsPR	TGGT1_247760;S19	1.59929	0.0220028	NaN	NaN	1.60297	2.01525	1.17964
TGGT1_247520	hypothetical protein	SVsLLPPSLR	TGGT1_247520;S220	1.6217	0.00851943	NaN	2.37334	1.2682	1.25483	1.59041
TGGT1_247450	hypothetical protein	SRDDsSER	TGGT1_247450;S262	1.36135	0.0271978	0.913803	NaN	0.90031	1.29916	2.33214
TGGT1_247300	hypothetical protein	LVAEESVLAAQLsDLSK	TGGT1_247300;S896	1.67859	0.0128159	NaN	NaN	1.63973	1.36739	2.02866
TGGT1_247300	hypothetical protein	IEsAQFLHDR	TGGT1_247300;S847	1.78769	0.0491653	NaN	NaN	1.01521	1.9269	2.42095
TGGT1_247250	RbAp46	QTAPSVPVLPLSVSASLLPTFSLSsPK	TGGT1_247250;S144	2.38238	0.00528741	NaN	NaN	2.03892	2.50643	2.6018
TGGT1_247050	hypothetical protein	ALENLVSPASFALtPR	TGGT1_247050;T1859	1.86016	0.0279389	NaN	NaN	1.86899	1.30567	2.40583
TGGT1_246982S631	hypothetical protein	KAsMSLSK	TGGT1_246982S631	1.42773	0.000492537	NaN	NaN	1.39821	1.39391	1.49108
TGGT1_246940	hypothetical protein	EEEAPDtPPMKEVEEPHQEREEVEEPPEER	TGGT1_246940;T128	1.42196	0.000899701	1.01494	1.89562	1.68806	1.25276	1.25842
TGGT1_246630	DNA-directed RNA polymerase I RPA43	RQEAGDGREsDSGSSR	TGGT1_246630;S349	1.37436	0.00229369	NaN	NaN	1.39369	1.25173	1.47767
TGGT1_246560	putative vacuolar ATP synthase subunit g	GsNALIQQLLEAEEEADTIVNK	TGGT1_246560;S7	1.41573	0.0345506	NaN	NaN	1.2377	1.06286	1.94663
TGGT1_246460	hypothetical protein	HAGLsPQLsPR	TGGT1_246460;S351;S355	1.52015	0.011655	NaN	NaN	1.8496	1.32657	1.38429
TGGT1_246460	hypothetical protein	HAGLsPQLSPR	TGGT1_246460;S351	1.39747	0.00223571	NaN	NaN	1.51604	1.28721	1.38916
TGGT1_245560	hypothetical protein	AAsTDAPVECGGR	TGGT1_245560;S964	1.44281	0.00825123	NaN	NaN	1.17968	1.59005	1.55871
TGGT1_245560	hypothetical protein	DAQAFPAQAGLGsEKsGGK	TGGT1_245560;S705; S708	1.44352	0.00872055	NaN	NaN	1.19703	1.66509	1.46843
TGGT1_244470	hypothetical protein	ADsQTALSAAK	TGGT1_244470;S1640	1.34786	0.0041549	NaN	NaN	1.25348	1.26814	1.52196
TGGT1_244440	nucleoside transporter protein	AVAAQQMsKADDGK	TGGT1_244440;S15	1.47053	0.0152628	NaN	1.10984	1.43711	1.0262	2.30895
TGGT1_244380	cactin	DVNPNADGSFsPELEPYDEGEVPPPVR	TGGT1_244380;S442	1.67381	0.00437895	NaN	NaN	1.80697	1.45312	1.76133
TGGT1_244350	DnaJ domain-containing protein	RHsDTQESSR	TGGT1_244350;S48	1.44752	0.0201422	NaN	NaN	1.10835	1.40671	1.8275
TGGT1_243990	Dullard family phosphatase domain-containing protein	FLsASSLGLSLR	TGGT1_243990;S319	1.43541	0.0245284	NaN	NaN	1.57218	1.74565	0.988409
TGGT1_243960	nuclear transport factor 2 (ntf2) domain-containing protein	APNAPATPIsPR	TGGT1_243960;S400	1.38171	0.00367311	NaN	0.894782	1.43803	1.60487	1.58914
TGGT1_243730	rhoptry protein ROP9	VVVKPsLIMQ	TGGT1_243730;S349	1.5597	0.0120162	NaN	NaN	1.85112	1.25397	1.57402
TGGT1_243440	histone lysine acetyltransferase GCN5-B	TFLsFVDETADFGDASVEK	TGGT1_243440;S456	1.64215	0.0194028	NaN	NaN	1.27934	1.57268	2.07442
TGGT1_242570	hypothetical protein	KHsANDGPAADGEPTTEEMR	TGGT1_242570;S196	1.40101	0.0012201	NaN	1.24493	1.72027	1.42368	1.21516
TGGT1_241820	putative membrane protein	KLAtEFDEEI	TGGT1_241820;T285	1.33181	0.0278542	NaN	NaN	1.13233	1.07828	1.78483
TGGT1_240980	hypothetical protein	EATAFSPSFETGsIDR	TGGT1_240980;S481	1.4053	0.000567511	NaN	NaN	1.45935	1.41254	1.34401
TGGT1_240700	ubiquitin family protein	RSsHSEDSLQPR	TGGT1_240700;S11	1.3459	0.001725	NaN	NaN	1.2526	1.33897	1.44612
TGGT1_240400	hypothetical protein	ERAsPQSFR	TGGT1_240400;S282	1.48701	0.00197269	NaN	1.40847	1.89734	1.21537	1.42688
TGGT1_240400	hypothetical protein	KQNALPDEGsDAVHEQK	TGGT1_240400;S123	1.64067	0.0031112	NaN	1.79857	2.09506	1.32783	1.34124
TGGT1_239620	5'-nucleotidase, C-terminal domain-containing protein	LTsFTSMR	TGGT1_239620;S836	1.59276	0.00572588	NaN	NaN	1.47859	1.46497	1.83472
TGGT1_239620	5'-nucleotidase, C-terminal domain-containing protein	VHsGAAtPVGEGK	TGGT1_239620;S747;T751	1.56204	0.0192325	NaN	NaN	1.37615	1.30998	2
TGGT1_239620	5'-nucleotidase, C-terminal domain-containing protein	ASAPPAGGGGsPLQFSGAVVGK	TGGT1_239620;S15	1.35064	0.00552679	NaN	NaN	1.27372	1.22767	1.55054
TGGT1_239500	putative proteasome subunit alpha type	LLsNEEVTALIK	TGGT1_239500;S231	1.37922	0.0177364	NaN	NaN	1.66982	1.43552	1.03233
TGGT1_237820	IMC sub-compartment protein ISP2	GLtIGLILQDK	TGGT1_237820;T52	1.42581	0.0127732	NaN	NaN	1.3238	1.2092	1.74442
TGGT1_236780	zinc finger, C3HC4 type (RING finger) domain-containing protein	SLsPSPAPLSESSPLLDANNATHESAAR	TGGT1_236780;S720	1.54245	0.0034735	NaN	NaN	1.57786	1.36989	1.67961
TGGT1_236570	lysine decarboxylase family protein	GSTsQSAsPAGVIQGR	TGGT1_236570;S377; S381	1.44687	0.00268385	1.0253	NaN	1.59058	1.75522	1.41639
TGGT1_236570	lysine decarboxylase family protein	EGSNSGNsPSSVPAEAISDK	TGGT1_236570;S35	1.36861	0.00164784	NaN	1.06488	1.52815	1.61493	1.26649
TGGT1_235470	myosin A	LYRDEGVSsK	TGGT1_235470;S518	1.33267	0.00711357	NaN	NaN	1.51012	1.36517	1.12273
TGGT1_235380	hypothetical protein	VLsYHPDPEADSK	TGGT1_235380;S404	1.3773	0.00603943	NaN	NaN	1.3439	1.57797	1.21002
TGGT1_234900	PHD-finger domain-containing protein	EGREsGGER	TGGT1_234900;S3857	1.46951	0.00794443	NaN	NaN	1.22176	1.51558	1.67118
TGGT1_234270	hypothetical protein	ALQsLDSLQMK	TGGT1_234270;S1057	1.72395	0.0117791	NaN	NaN	1.92741	1.89764	1.34679
TGGT1_234190	putative serine hydroxymethyltransferase 2	EVMsPSWATYASQVIR	TGGT1_234190;S438	1.34621	0.000742123	NaN	NaN	1.32947	1.41646	1.2927
TGGT1_233890	hypothetical protein	KLsGESEAEGGQEGK	TGGT1_233890;S327	1.38444	0.00208646	NaN	1.77989	1.32969	1.14525	1.28292
TGGT1_233140	putative deoxyuridine 5'-triphosphate nucleotidohydrolase	GEGGFGsTTCPAGEPEMK	TGGT1_233140;S151	1.33406	0.000382849	NaN	NaN	1.35597	1.36415	1.28205
TGGT1_233110	IMP dehydrogenasa	EGDVHDLHsFER	TGGT1_233110;S544	1.5454	3.98394e-05	NaN	NaN	1.56222	1.54554	1.52843
TGGT1_233110	IMP dehydrogenasa	GLRsPEAsPSTAASSGGASR	TGGT1_233110;S422;S426	1.52205	0.00148923	NaN	NaN	1.60763	1.54911	1.4094
TGGT1_233010	putative cell-cycle-assocaited protein kinase ERK7	SVAHSESNNSEAGGNPVLtDYVATR	TGGT1_233010;T178	1.37042	0.011752	NaN	1.57228	0.907388	1.02548	1.97653
TGGT1_232660	Hsp70 interacting protein HIP	EAHsDLDMGQK	TGGT1_232660;S207	1.40503	0.00530219	NaN	NaN	1.27625	1.60804	1.33081
TGGT1_232620	hypothetical protein	VAYtPPGTDAR	TGGT1_232620;T739	1.35091	0.0132982	NaN	NaN	1.35758	1.62006	1.07508
TGGT1_232350	lactate dehydrogenase LDH1	YVADALSVsPR	TGGT1_232350;S176	1.73635	0.00663504	NaN	NaN	1.84828	1.9067	1.45407
TGGT1_232340	protein phosphatase 2C domain-containing protein	TSEDEEDGEGAsR	TGGT1_232340;S229	1.42205	0.0390972	0.762215	NaN	1.31218	1.02524	2.58857
TGGT1_232280	hypothetical protein	LAGQMsLAAR	TGGT1_232280;S22	1.508	0.00665267	0.596383	2.17786	1.72231	1.95509	1.08836
TGGT1_232150	hypothetical protein	GCsNVIDESLDEFLVK	TGGT1_232150;S8	1.33914	0.00316681	NaN	NaN	1.30559	1.48349	1.22835
TGGT1_232150	hypothetical protein	ALsVAVTGLGEQVK	TGGT1_232150;S100	1.84763	0.0492576	NaN	NaN	1.0764	1.91981	2.54668
TGGT1_232080	hypothetical protein	REsPDRR	TGGT1_232080;S5365	1.39435	0.00429806	NaN	NaN	1.28185	1.32515	1.57606
TGGT1_232060	hypothetical protein	QHELPRtPDRGEK	TGGT1_232060;T40	1.41129	0.0159822	NaN	NaN	1.09192	1.42489	1.71705
TGGT1_232060	hypothetical protein	VAGPASAPEsDSGDRR	TGGT1_232060;S191	1.81947	0.00272919	NaN	NaN	1.81838	1.98498	1.65504
TGGT1_232060	hypothetical protein	VAGPAsAPESDSGDR	TGGT1_232060;S187	1.37455	0.00293268	0.932177	NaN	1.62126	1.53004	1.41473
TGGT1_231930	hypothetical protein	DGASAAATVISAVLsSDELEAGEEEVPR	TGGT1_231930;S254	1.4829	0.0167127	NaN	NaN	1.68354	1.09468	1.67049
TGGT1_231480	putative GCN1	SPAAVQSESSTAAPsPR	TGGT1_231480;S1724	1.35174	0.00367241	NaN	NaN	1.5126	1.30023	1.2424
TGGT1_231210	sarcalumenin/eps15 family protein	sKNEGNTWMIDK	TGGT1_231210;S427	1.67248	0.0181305	NaN	NaN	1.40652	1.484	2.12691
TGGT1_231190	arsenite-activated ATPase family protein	FGDLLSSCRPLPILPPAPSsP	TGGT1_231190;S396	1.34875	0.042238	NaN	NaN	1.30175	1.86655	0.877963
TGGT1_231000	START domain-containing protein	AsVEDAATAVALLR	TGGT1_231000;S98	1.43704	0.0126454	NaN	NaN	1.20401	1.35576	1.75136
TGGT1_230950	hypothetical protein	VLLAGQGsPTPPLFAPNLR	TGGT1_230950;S335	1.73998	0.000794597	NaN	NaN	1.69595	1.68603	1.83797
TGGT1_230940	hypothetical protein	EAESASAGAPTGQTAPAtPVLR	TGGT1_230940;T433	1.36773	0.0164251	0.651998	2.67598	1.23684	1.22787	1.04597
TGGT1_230940	hypothetical protein	AAtPVRDRsPHPTSEAPK	TGGT1_230940;T387; S393	1.58064	0.0153285	NaN	NaN	1.52309	1.94869	1.27015
TGGT1_230940	hypothetical protein	EPSPIAAPAVKsPR	TGGT1_230940;S382	1.58439	0.00387017	NaN	1.25003	1.7159	2.07596	1.29569
TGGT1_230940	hypothetical protein	EPsPIAAPAVKsPR	TGGT1_230940;S373;S382	1.51041	0.00877989	NaN	NaN	1.57304	1.71982	1.23837
TGGT1_229310	mediator complex subunit MED14	VVDEEEsEEDEDLR	TGGT1_229310;S575	1.45909	0.0221326	NaN	NaN	1.79221	1.54345	1.0416
TGGT1_229310	mediator complex subunit MED14	LsPGHSEGGAPGVR	TGGT1_229310;S3658	1.4822	0.0131526	NaN	NaN	1.79068	1.45856	1.19736
TGGT1_229210	putative small nuclear ribonucleoprotein polypeptide A'	ATTMEEITRLEsALK	TGGT1_229210;S225	1.43349	0.00550716	NaN	1.2506	1.76914	1.75523	0.958998
TGGT1_229180	HEAT repeat-containing protein	AEEAEDDEDMtYVILDSNTSLGLK	TGGT1_229180;T752	1.61039	0.00183159	NaN	NaN	1.63343	1.71673	1.48101
TGGT1_228660	Sec7 domain-containing protein	GEVEQSEGDLGEREEsNHLEDVTGDR	TGGT1_228660;S1837	1.41194	0.00032258	NaN	NaN	1.37189	1.40499	1.45893
TGGT1_228490	hypothetical protein	KHAsQEAAEEDANMEGSCQIR	TGGT1_228490;S344	1.40059	0.0231989	NaN	NaN	1.71563	1.50188	0.984247
TGGT1_228230	hypothetical protein	GAGAPSsPLLTLLEK	TGGT1_228230;S916	1.40471	0.0218182	NaN	NaN	1.79063	1.35944	1.06407
TGGT1_228120	hypothetical protein	GEMDGSAtPSDPFLSEK	TGGT1_228120;T3553	1.35485	0.00537142	0.813593	2.23283	1.44704	1.3059	0.974869
TGGT1_228120	hypothetical protein	GGGAGsEDEGEKEKEEKPER	TGGT1_228120;S2823	1.39503	0.00464109	NaN	1.63756	1.76416	1.18155	0.996859
TGGT1_228070	hypothetical protein	MAQEDLLLLPGWEADGEGVsPLQTR	TGGT1_228070;S2497	1.46938	0.0332197	NaN	NaN	1.86677	1.59924	0.942128
TGGT1_228070	hypothetical protein	TELPADsDTFVLPWEK	TGGT1_228070;S1797	1.47405	0.00701572	NaN	NaN	1.61396	1.58168	1.22651
TGGT1_227820	hypothetical protein	KAsSLSQGDGSGLLGR	TGGT1_227820;S1434	1.34256	0.0185956	NaN	NaN	1.48712	1.56651	0.97404
TGGT1_227650	putative microtubule-associated protein RP/EB family	GRGsPYGEGEAEAR	TGGT1_227650;S227	1.584	0.0175734	NaN	NaN	1.91204	1.65481	1.18516
TGGT1_227650	putative microtubule-associated protein RP/EB family	ETPSQASVSAQASTsPVTSR	TGGT1_227650;S190	1.6155	0.0269417	NaN	NaN	1.93717	1.83173	1.0776
TGGT1_227620	dense granule protein GRA2	FAENVGHHsEK	TGGT1_227620;S97	1.33401	0.0391361	NaN	NaN	1.58974	1.62188	0.790422
TGGT1_227390	hypothetical protein	VDALAVtPEDQGVSGK	TGGT1_227390;T164	1.35836	0.00571842	NaN	NaN	1.40926	1.50607	1.15975
TGGT1_227030	hypothetical protein	GtIVLTWSK	TGGT1_227030;T29	2.1962	0.000424468	NaN	NaN	2.22605	2.10726	2.25528
TGGT1_227030	hypothetical protein	HDsHPIVEDAEGAYLTFDPSCR	TGGT1_227030;S8	1.72758	0.00448087	NaN	NaN	1.9591	1.62566	1.59799
TGGT1_227030	hypothetical protein	TLsPVLFR	TGGT1_227030;S152	1.37717	0.00738145	NaN	NaN	1.50915	1.48265	1.1397
TGGT1_226710	hypothetical protein	EPPLCsLEGASADAAVQMVK	TGGT1_226710;S281	1.71364	0.0309348	NaN	NaN	1.46814	1.34597	2.32681
TGGT1_226680	hypothetical protein	GAFsPSALSHFSQR	TGGT1_226680;S352	1.41962	0.00387692	NaN	NaN	1.58459	1.39341	1.28087
TGGT1_226660	hypothetical protein	VALDETtPR	TGGT1_226660;T566	1.43479	0.0107098	1.13163	2.67742	1.21154	1.27481	0.87855
TGGT1_226060	transmembrane amino acid transporter protein	sLVAPLLHAER	TGGT1_226060;S425	1.47257	0.0124292	NaN	NaN	1.62458	1.65164	1.1415
TGGT1_225860	hypothetical protein	AAESAEAsAAsPPK	TGGT1_225860;S750; S753	1.45356	0.0377925	NaN	NaN	1.17842	1.1472	2.03505
TGGT1_225860	hypothetical protein	RGEDGSAAGsEAK	TGGT1_225860;S189	1.46289	0.00300662	NaN	NaN	1.57205	1.51056	1.30607
TGGT1_225690	hypothetical protein	LPCVSsFAVK	TGGT1_225690;S1320	1.37079	0.0154766	NaN	NaN	1.26562	1.13874	1.70801
TGGT1_225310	putative ARF1-directed GTPase-activating protein	SGsGINPVPPPTSASFTER	TGGT1_225310;S166	1.70192	0.0170155	NaN	NaN	1.67475	1.32671	2.10431
TGGT1_224980	hypothetical protein	EVLLSLGsSSGR	TGGT1_224980;S47	1.33451	0.000851334	NaN	NaN	1.26254	1.34462	1.39637
TGGT1_224850	putative polyadenylate binding protein	FGsITSLVVR	TGGT1_224850;S287	1.3389	0.00162631	NaN	NaN	1.35877	1.421	1.23692
TGGT1_224700	hypothetical protein	VADAKtPRPEELR	TGGT1_224700;T1053	1.37999	0.0191772	NaN	NaN	1.4932	1.6446	1.00216
TGGT1_224330	proteasome activator pa28 beta subunit protein	TGSTtPELHEDPSTETR	TGGT1_224330;T240	1.37021	0.00812308	NaN	1.92962	0.918503	1.4697	1.16303
TGGT1_223590	proteasome subunit	sGSAADTQAVTQIVK	TGGT1_223590;S215	1.6989	0.0284599	NaN	NaN	2.01403	1.96899	1.11369
TGGT1_223540	importin-beta N-terminal domain-containing protein	KHWDCPGAGLDENEEDASsAR	TGGT1_223540;S91	1.3862	0.00156775	NaN	NaN	1.46706	1.41023	1.28131
TGGT1_223540	importin-beta N-terminal domain-containing protein	EGAAEQAGDDsAEEDAAFASMTVLSALK	TGGT1_223540;S658	2.06548	0.0319939	NaN	NaN	2.16912	1.36409	2.66324
TGGT1_223110	glycolipid transfer protein GLTP	GEGLFVTLTsGFSK	TGGT1_223110;S24	2.38059	0.0233217	NaN	NaN	1.98475	3.12009	2.03694
TGGT1_223070	hypothetical protein	VSQQSsDAGF	TGGT1_223070;S207	1.55028	0.00348974	1.03707	NaN	1.7519	1.86765	1.54448
TGGT1_223070	hypothetical protein	DLFPNPPLSHMSsGFDDGELCAVR	TGGT1_223070;S131	1.39524	0.00319459	NaN	NaN	1.24701	1.51697	1.42175
TGGT1_222710	putative IMP-specific 5'-nucleotidase 1	REtLDAVGGESGR	TGGT1_222710;T123	1.87793	0.0194623	NaN	NaN	2.20802	2.07393	1.35183
TGGT1_222710	putative IMP-specific 5'-nucleotidase 1	DEGTPsPK	TGGT1_222710;S35	1.51401	0.0208226	NaN	NaN	1.81437	1.64689	1.08076
TGGT1_222710	putative IMP-specific 5'-nucleotidase 1	HSLsAGSASLGGGPGR	TGGT1_222710;S320	1.51639	0.00359168	NaN	NaN	1.5653	1.64397	1.33989
TGGT1_222430	HECT-domain (ubiquitin-transferase) domain-containing protein	GLSGLSHGAsLPQVSLSR	TGGT1_222430;S470	1.34497	0.000105247	NaN	NaN	1.37084	1.32371	1.34036
TGGT1_221870	hypothetical protein	GLTFAGNsFGFSAR	TGGT1_221870;S990	1.52778	0.000415641	NaN	1.47649	1.52782	1.7642	1.34263
TGGT1_221470	hypothetical protein	VALSSLTtQPAEISK	TGGT1_221470;T170	1.44201	0.0100792	NaN	NaN	1.58126	1.59442	1.15036
TGGT1_220900	hypothetical protein	TEQGNEADNAEEPRQsR	TGGT1_220900;S97	1.37245	0.00777498	NaN	2.00386	1.04053	1.20614	1.23926
TGGT1_220900	hypothetical protein	RPsFLSLK	TGGT1_220900;S73	1.36701	0.0148083	NaN	0.963821	1.73029	1.92395	0.849972
TGGT1_220490	putative pre-rRNA-processing protein PNO1	LVFADsR	TGGT1_220490;S250	1.45665	0.00746295	NaN	NaN	1.59461	1.57143	1.20391
TGGT1_220390	hypothetical protein	AEsGKLEEGK	TGGT1_220390;S264	1.42439	0.0287036	NaN	NaN	1.2848	1.08441	1.90396
TGGT1_220330	hypothetical protein	SAsETASASR	TGGT1_220330;S94	1.35555	0.000127408	NaN	NaN	1.3861	1.3418	1.33874
TGGT1_220230A	leucine rich repeat-containing protein	APtLTEEDASQFVAALHAR	TGGT1_220230A;T83	1.55891	0.0485506	NaN	NaN	2.22179	1.45542	0.999522
TGGT1_220190	hypothetical protein	RPsREQR	TGGT1_220190;S431	1.75138	0.0391476	NaN	NaN	1.5616	1.25	2.44254
TGGT1_220190	hypothetical protein	KGAAIAAAAGVIASPPsEEEPDSGEKR	TGGT1_220190;S403	1.42599	0.00378269	NaN	NaN	1.25305	1.48462	1.54031
TGGT1_220190	hypothetical protein	KGAAIAAAAGVIAsPPsEEEPDSGEKR	TGGT1_220190;S400;S403	1.75795	0.0169738	NaN	NaN	2.22087	1.55385	1.49914
TGGT1_220190	hypothetical protein	RDEHLsPFRELGADAEGDR	TGGT1_220190;S343	1.45313	0.0425348	NaN	NaN	0.987236	1.33269	2.03945
TGGT1_219700	putative DNA replication licensing factor MCM4	GLESSASEYGGtPLAVR	TGGT1_219700;T127	1.35087	0.0116215	NaN	NaN	1.08243	1.38164	1.58855
TGGT1_219690	hypothetical protein	RNssSMLDASK	TGGT1_219690;S126; S127	1.80131	0.0255407	NaN	NaN	2.15605	2.02902	1.21885
TGGT1_219540	cytosolic tRNA-Ala synthetase	EKDGSLtPLPAPCVDTGMGLER	TGGT1_219540;T493	1.60649	0.0112054	NaN	NaN	1.89593	1.30238	1.62115
TGGT1_219540	cytosolic tRNA-Ala synthetase	SGDFILHIGsMSK	TGGT1_219540;S855	2.24456	0.000661489	NaN	NaN	2.35068	2.23103	2.15198
TGGT1_219540	cytosolic tRNA-Ala synthetase	LVDLsSQAEFEVVDSQK	TGGT1_219540;S833	2.0845	0.0069609	NaN	NaN	2.13122	1.76104	2.36123
TGGT1_219540	cytosolic tRNA-Ala synthetase	AASENTsFK	TGGT1_219540;S721	1.57382	0.00763729	NaN	NaN	1.34615	1.55153	1.82379
TGGT1_219440	hypothetical protein	SLsQAEELQTDR	TGGT1_219440;S1251	1.34557	0.01562	NaN	NaN	1.59068	1.42749	1.01853
TGGT1_218250	TAP42 family protein	EPGPQsPAAR	TGGT1_218250;S298	1.50057	0.000467124	NaN	NaN	1.53909	1.43609	1.52653
TGGT1_218250	TAP42 family protein	SFDsIVDALQQSADSSEAGPAGFSSFR	TGGT1_218250;S269	1.5022	0.00697557	NaN	NaN	1.61218	1.6438	1.25061
TGGT1_217510	hypothetical protein	LVGVPsFNATR	TGGT1_217510;S152	1.43623	0.0080113	NaN	0.903968	1.39747	1.4284	2.01507
TGGT1_217220	zinc finger, C3HC4 type (RING finger) domain-containing protein	KLsQEEQETVFAQR	TGGT1_217220;S570	1.38451	0.00666005	NaN	NaN	1.59635	1.20768	1.3495
TGGT1_216620	EF hand domain-containing protein	VEGtSEEILAK	TGGT1_216620;T1613	1.3924	0.0235458	NaN	NaN	1.31591	1.05976	1.80153
TGGT1_215260	carbamoylphosphate synthetase	TSSsGECMR	TGGT1_215260;S908	1.36855	0.0004921	NaN	NaN	1.34524	1.33163	1.42878
TGGT1_215260	carbamoylphosphate synthetase	GQGTHLPGNAsPAsDSGLRTPTTAESDADACIR	TGGT1_215260;S1566; S1569	1.41825	0.00507529	0.853147	NaN	1.55017	1.69991	1.56978
TGGT1_214950	hypothetical protein	TTSAPsEEDPTQKPPK	TGGT1_214950;S8	1.34548	0.00834583	NaN	NaN	1.44474	1.49209	1.09961
TGGT1_214840	AP2 domain transcription factor AP2X-7	GAsLPPLLDVLWGPSVAGTGAAAAAPGDR	TGGT1_214840;S1048	1.51425	0.0150181	NaN	NaN	1.84838	1.19903	1.49534
TGGT1_214740	hypothetical protein	RELSAEsDGDVEHK	TGGT1_214740;S1015	1.43012	0.0455527	NaN	NaN	1.04171	1.19226	2.05639
TGGT1_214090	signal peptidase	RMsVDEGPPPDGFTEETLPTPR	TGGT1_214090;S1387	1.37671	0.00123526	NaN	1.20221	1.48057	1.65012	1.17394
TGGT1_214080	toxofilin	GRFEsGDEGTSTMSPSVAAR	TGGT1_214080;S53	1.35998	0.009816	NaN	0.678163	1.64077	1.46597	1.65503
TGGT1_213740	hypothetical protein	EGsPEAVPTR	TGGT1_213740;S72	1.46992	0.00903259	NaN	NaN	1.43478	1.72921	1.24578
TGGT1_212990	hypothetical protein	VTDVGHsPR	TGGT1_212990;S152	1.3325	0.00212488	NaN	NaN	1.45085	1.30249	1.24417
TGGT1_212290	ribosomal protein RPS19	QCAKPAVAsD	TGGT1_212290;S312	1.50934	0.00433288	NaN	1.0184	1.9466	1.61331	1.45905
TGGT1_212220	hypothetical protein	GNIGDDETVAGHSCPLIVsPRPDDEADK	TGGT1_212220;S959	1.41804	0.0194402	NaN	0.546633	1.64006	1.99418	1.49128
TGGT1_212210	hypothetical protein	EAVPAQASVEAPTQDENSKDPPPLINHGFsR	TGGT1_212210;S59	2.75083	0.00980637	NaN	2.34106	2.17391	2.33939	4.14896
TGGT1_212090	hypothetical protein	LAsLATDGAPLGAVAAAGSPAPR	TGGT1_212090;S67	1.60149	0.0210613	NaN	2.64598	1.05099	1.22172	1.48725
TGGT1_212090	hypothetical protein	FAsGPVAPYAGLQADR	TGGT1_212090;S352	1.33853	0.0208592	NaN	NaN	1.04619	1.25748	1.71192
TGGT1_212090	hypothetical protein	GGDADSDKGGASGsQNSTPR	TGGT1_212090;S30	1.34092	0.0209988	NaN	NaN	0.976005	1.39272	1.65403
TGGT1_211690	AAA family protein	TVTAAAADEGTSsPASGSR	TGGT1_211690;S660	1.45074	0.00451292	NaN	NaN	1.57938	1.51401	1.25884
TGGT1_211410	translation initiation factor sui1 protein	SEsPMAAPATLSTEAMDEYFR	TGGT1_211410;S340	1.50943	0.0110943	NaN	NaN	1.48117	1.80017	1.24695
TGGT1_210820	hypothetical protein	ELAAsQK	TGGT1_210820;S750	1.50532	0.0174504	NaN	NaN	1.26638	1.34375	1.90584
TGGT1_210800	putative activator of hsp90 ATPase	FNsAELSLLDGSTTLK	TGGT1_210800;S262	1.58567	0.0131542	NaN	NaN	1.82584	1.70633	1.22485
TGGT1_210700	hypothetical protein	AsFFFSR	TGGT1_210700;S4466	1.45122	0.015002	NaN	NaN	1.49182	1.74032	1.12153
TGGT1_209985	cAMP-dependent protein kinase	GDGDsGEQSEGRPVVLVPK	TGGT1_209985;S34	1.46546	0.00566646	NaN	NaN	1.29064	1.43497	1.67076
TGGT1_209800	formate/nitrite transporter protein	GQREsFAGESSTLVMGDIK	TGGT1_209800;S318	1.47464	0.00169654	NaN	NaN	1.5355	1.35301	1.53542
TGGT1_209600	hypothetical protein	AAAQQLQQsA	TGGT1_209600;S450	2.13689	0.00355425	NaN	NaN	2.16269	1.90387	2.3441
TGGT1_209600	hypothetical protein	VIDTQAGELGLsLGGAEGTSHAK	TGGT1_209600;S263	1.80202	0.00165373	NaN	NaN	1.94109	1.77303	1.69193
TGGT1_209420	hypothetical protein	TWIAYGDGDVEGPEsDGER	TGGT1_209420;S97	1.72867	0.00756353	NaN	NaN	1.86218	1.8969	1.42694
TGGT1_209130	regulator of chromosome condensation (RCC1) repeat-containing protein	AASGVLGSTSPGASGSPEtPPEAQGR	TGGT1_209130;T842	1.45538	0.0397751	NaN	NaN	1.64954	0.867996	1.84859
TGGT1_208750	RWD domain-containing protein	DESLFEGEDDEELLsD	TGGT1_208750;S267	1.77134	0.00200124	1.2773	NaN	1.92166	1.81038	2.07602
TGGT1_208500	protein phosphatase 2C domain-containing protein	TQGGISEAGDPAsDEEEQGGSRQPEDASHAQR	TGGT1_208500;S626	1.3717	2.1572e-05	1.30691	1.3268	1.53538	1.48137	1.20807
TGGT1_208070	inositol polyphosphate kinase	GGAGEAsPGETEER	TGGT1_208070;S157	1.34218	0.0414527	NaN	NaN	1.61385	1.63462	0.77808
TGGT1_206690	glideosome-associated protein with multiple-membrane spans GAPM2B	WSPDLHsR	TGGT1_206690;S310	1.33296	0.0479208	NaN	NaN	1.00784	1.05306	1.93797
TGGT1_206670	hypothetical protein	EVEYGTGLHEGRLsPGQDQGEVLDEGGDADFADPEDEEK	TGGT1_206670;S60	2.44586	0.0100917	NaN	NaN	2.40709	2.48464	NaN
TGGT1_206540	hypothetical protein	RASREDsEPR	TGGT1_206540;S491	1.43501	0.0059391	NaN	NaN	1.2178	1.5032	1.58404
TGGT1_205730	hypothetical protein	KLtVEIQR	TGGT1_205730;T10	1.79993	0.00321944	NaN	NaN	1.9237	1.8793	1.59679
TGGT1_205710	lysine-tRNA ligase	HGsDAGAPGEASAPAQ	TGGT1_205710;S645	1.64795	0.00509489	0.992316	NaN	1.82181	1.79337	1.98429
TGGT1_205558T37	NAC domain-containing protein	LEEVNQEEDAGtPEGR	TGGT1_205558T37	1.37479	0.00018615	1.247	NaN	1.31115	1.52121	1.41979
TGGT1_205470	putative translation elongation factor 2 family protein	SGtLTTLDTAHNIADMK	TGGT1_205470;T458	2.33792	0.0012633	NaN	NaN	2.43711	2.40397	2.17267
TGGT1_205470	putative translation elongation factor 2 family protein	VFsGTVATGQK	TGGT1_205470;S392	2.04944	0.00356527	NaN	1.32273	2.35744	2.19833	2.31925
TGGT1_205360	hypothetical protein	LPsLHAAPR	TGGT1_205360;S695	1.50756	0.012623	NaN	NaN	1.23349	1.82176	1.46742
TGGT1_205320	hypothetical protein	EESSAGATVVtPEVGEPSGTK	TGGT1_205320;T172	1.47199	0.019014	NaN	NaN	1.48843	1.10739	1.82016
TGGT1_205320	hypothetical protein	AsFKYDTSPETVGTGPTVFESQPTLTR	TGGT1_205320;S661	1.39455	0.0318248	NaN	0.702916	1.14844	1.30195	2.4249
TGGT1_205320	hypothetical protein	MAAVVSEESsQK	TGGT1_205320;S39	1.83438	0.00206821	NaN	NaN	1.9569	1.67471	1.87154
TGGT1_205320	hypothetical protein	KDsQTVFVSEPVSQSVAHFR	TGGT1_205320;S337	1.41361	0.00538299	NaN	1.96312	1.04549	1.33852	1.30731
TGGT1_205320	hypothetical protein	STSEVsTEGEALPGAR	TGGT1_205320;S19	1.39523	0.0064277	NaN	NaN	1.2083	1.38054	1.59684
TGGT1_205250	rhoptry protein ROP18	VNAQEtNQRR	TGGT1_205250;T109	1.42949	0.00653459	0.845216	2.46541	1.13972	1.315	1.38212
TGGT1_205240	cleft lip and palate transmembrane protein 1 (clptm1) protein	DDDLQQPGsEEKNEEETHAK	TGGT1_205240;S740	1.34309	0.0111755	NaN	NaN	1.4753	1.49698	1.05699
TGGT1_205130	hypothetical protein	AAQsEAEESGTK	TGGT1_205130;S2254	1.37684	0.0135753	NaN	NaN	1.258	1.17509	1.69744
TGGT1_205100	hypothetical protein	RENsFASK	TGGT1_205100;S493	1.6684	0.000903113	NaN	NaN	1.76546	1.59781	1.64194
TGGT1_203760	hypothetical protein	ALEGGEEQAEGFsSVDER	TGGT1_203760;S958	1.40495	0.000512579	1.22425	NaN	1.41689	1.34215	1.63652
TGGT1_203750	hypothetical protein	EELSELGSTPsSR	TGGT1_203750;S1036	1.74786	0.0240819	NaN	NaN	2.13388	1.89718	1.21252
TGGT1_203630	ribosomal protein RPL44	GKDsLVVQGK	TGGT1_203630;S34	1.50924	0.0122111	NaN	NaN	1.73285	1.61538	1.1795
TGGT1_203320	zinc finger in N-recognin protein	EEEEKPGsEAGGESVNATPASLLLGR	TGGT1_203320;S4574	1.33851	0.00560888	NaN	NaN	1.53977	1.23307	1.24269
TGGT1_203320	zinc finger in N-recognin protein	VTFDsDDDMR	TGGT1_203320;S2132	1.35545	0.0203029	1.06466	NaN	2.25379	1.00071	1.10265
TGGT1_202890	hypothetical protein	GHAQFTTWPsSGR	TGGT1_202890;S212	1.37831	0.000144628	NaN	1.25463	1.51886	1.33805	1.4017
TGGT1_202890	hypothetical protein	RNsAGVAGGSGVR	TGGT1_202890;S132	1.64101	0.00190503	NaN	NaN	1.76751	1.63636	1.51917
TGGT1_202540	3'5'-cyclic nucleotide phosphodiesterase domain-containing protein	MDRLEsDLKR	TGGT1_202540;S923	1.3739	0.0284438	NaN	NaN	1.79512	0.975826	1.35074
TGGT1_202190	hypothetical protein	QRsGDAAASR	TGGT1_202190;S467	1.35011	0.026919	NaN	NaN	1.15586	1.09359	1.80089
TGGT1_201380	putative chorismate synthase	LLFGVDNPtPGETVIETR	TGGT1_201380;T230	1.34064	0.00614226	NaN	NaN	1.44017	1.12964	1.45211
TGGT1_201260	sugar transporter ST3	RNsDPGDRDLSGWSLPSDVTAVGVATEEEAGSGK	TGGT1_201260;S67	1.58125	0.00890899	NaN	NaN	1.86525	1.35417	1.52433
TGGT1_201260	sugar transporter ST3	ALGEQEsHAGAIIMQQEQR	TGGT1_201260;S343	1.65822	0.00984656	NaN	NaN	1.47373	1.5119	1.98903
TGGT1_200460	hypothetical protein	DPGFYDNQTVsQEGTVDSFIIR	TGGT1_200460;S26	1.43443	0.0114788	NaN	NaN	1.31223	1.24876	1.7423

## Sheet: Supp Data 1.4
Supplementary Data 1.4: Pathways enriched in hypophosphorylated T. gondii proteins
ID	Name	p-value (-Log2)	Bgd count	Result count	Result gene list	Pct of bgd	Fold enrichment	Odds ratio	P-value	Benjamini FDR	Bonferroni
PWY-7782__PK__MetaCyc	Plasmalogen biosynthesis	8.9199	14	3	TGGT1_216930,TGGT1_230690,TGGT1_256980,	21.4	11.11	15.11	0.00206463	0.299883	0.637971
PWY-7818__PK__MetaCyc	Type IV lipoteichoic acid biosynthesis	6.08322	10	2	TGGT1_216930,TGGT1_270220,	20	10.37	13.45	0.0147492	0.299883	1
ec00590__PK__KEGG	Arachidonic acid metabolism	6.08322	10	2	TGGT1_255510,TGGT1_321520,	20	10.37	13.45	0.0147492	0.299883	1
PWY-7199__PK__MetaCyc	Pyrimidine deoxyribonucleosides salvage	4.70993	2	1	TGGT1_249180,	50	25.93	52.36	0.0382094	0.299883	1
PWY-6614__PK__MetaCyc	Tetrahydrofolate biosynthesis	4.70993	2	1	TGGT1_249180,	50	25.93	52.36	0.0382094	0.299883	1
PWY-3561__PK__MetaCyc	Choline biosynthesis III	4.70993	2	1	TGGT1_216930,	50	25.93	52.36	0.0382094	0.299883	1
PWY3O-450__PK__MetaCyc	Phosphatidylcholine biosynthesis I	4.70993	2	1	TGGT1_216930,	50	25.93	52.36	0.0382094	0.299883	1
ec00564__PK__KEGG	Glycerophospholipid metabolism	4.41194	72	4	TGGT1_216930,TGGT1_230690,TGGT1_255510,TGGT1_256980,	5.6	2.88	3.26	0.0469759	0.299883	1

## Sheet: Supp Data 1.5
Supplementary Data 1.5: Biological processes enriched in hypophosphorylated T. gondii proteins
ID	Name	Bgd count	Result count	Result gene list	Pct of bgd	Fold enrichment	Odds ratio	P-value	Benjamini	Bonferroni
GO:0051336	regulation of hydrolase activity	23	4	TGGT1_203910,TGGT1_214970,TGGT1_273070,TGGT1_274130,	17.4	5.79	7.02	0.00438763	0.439483	1
GO:0050790	regulation of catalytic activity	28	4	TGGT1_203910,TGGT1_214970,TGGT1_273070,TGGT1_274130,	14.3	4.76	5.55	0.00904101	0.439483	1
GO:0065009	regulation of molecular function	29	4	TGGT1_203910,TGGT1_214970,TGGT1_273070,TGGT1_274130,	13.8	4.59	5.32	0.0102493	0.439483	1
GO:0043087	regulation of GTPase activity	20	3	TGGT1_203910,TGGT1_273070,TGGT1_274130,	15	5	5.83	0.0207049	0.439483	1
GO:0070647	protein modification by small protein conjugation or removal	21	3	TGGT1_221610,TGGT1_294360,TGGT1_305940,	14.3	4.76	5.5	0.0236381	0.439483	1
GO:0006231	dTMP biosynthetic process	1	1	TGGT1_249180,	100	33.3	inf	0.0300268	0.439483	1
GO:1905774	regulation of DNA helicase activity	1	1	TGGT1_214970,	100	33.3	inf	0.0300268	0.439483	1
GO:1905463	negative regulation of DNA duplex unwinding	1	1	TGGT1_214970,	100	33.3	inf	0.0300268	0.439483	1
GO:1905462	regulation of DNA duplex unwinding	1	1	TGGT1_214970,	100	33.3	inf	0.0300268	0.439483	1
GO:0051097	negative regulation of helicase activity	1	1	TGGT1_214970,	100	33.3	inf	0.0300268	0.439483	1
GO:0051095	regulation of helicase activity	1	1	TGGT1_214970,	100	33.3	inf	0.0300268	0.439483	1
GO:0046073	dTMP metabolic process	1	1	TGGT1_249180,	100	33.3	inf	0.0300268	0.439483	1
GO:0042136	neurotransmitter biosynthetic process	1	1	TGGT1_249180,	100	33.3	inf	0.0300268	0.439483	1
GO:0033044	regulation of chromosome organization	1	1	TGGT1_214970,	100	33.3	inf	0.0300268	0.439483	1
GO:0009177	pyrimidine deoxyribonucleoside monophosphate biosynthetic process	1	1	TGGT1_249180,	100	33.3	inf	0.0300268	0.439483	1
GO:0009176	pyrimidine deoxyribonucleoside monophosphate metabolic process	1	1	TGGT1_249180,	100	33.3	inf	0.0300268	0.439483	1
GO:0009162	deoxyribonucleoside monophosphate metabolic process	1	1	TGGT1_249180,	100	33.3	inf	0.0300268	0.439483	1
GO:0009157	deoxyribonucleoside monophosphate biosynthetic process	1	1	TGGT1_249180,	100	33.3	inf	0.0300268	0.439483	1
GO:0006545	glycine biosynthetic process	1	1	TGGT1_249180,	100	33.3	inf	0.0300268	0.439483	1
GO:0006425	glutaminyl-tRNA aminoacylation	1	1	TGGT1_217460,	100	33.3	inf	0.0300268	0.439483	1
GO:1905775	negative regulation of DNA helicase activity	1	1	TGGT1_214970,	100	33.3	inf	0.0300268	0.439483	1
GO:2001251	negative regulation of chromosome organization	1	1	TGGT1_214970,	100	33.3	inf	0.0300268	0.439483	1

## Sheet: Supp Data 1.6
Supplementary Data 1.6: Protein-protein interaction analysis on the differentially phosphorylated T. gondii proteins
#node1	node2	node1_string_internal_id	node2_string_internal_id	node1_external_id	node2_external_id	neighborhood_on_chromosome	gene_fusion	phylogenetic_cooccurrence	homology	coexpression	experimentally_determined_interaction	database_annotated	automated_textmining	combined_score
TGME49_039500	TGME49_023590	915683	914487	5811.TGME49_039500	5811.TGME49_023590	0	0	0	0	0.968	0.981	0.501	0.147	0.999
TGME49_078050	TGME49_023590	918350	914487	5811.TGME49_078050	5811.TGME49_023590	0	0	0	0	0.968	0.981	0.501	0.147	0.999
TGME49_078050	TGME49_039500	918350	915683	5811.TGME49_078050	5811.TGME49_039500	0	0	0.309	0.852	0.968	0.981	0.501	0.43	0.999
TGME49_110670	TGME49_026910	920045	914786	5811.TGME49_110670	5811.TGME49_026910	0.381	0	0	0	0.968	0	0.927	0.658	0.999
TGME49_019700	TGME49_014970	914220	913834	5811.TGME49_019700	5811.TGME49_014970	0	0	0.366	0.671	0.968	0.943	0.501	0.606	0.999
TGME49_049180	TGME49_019700	916346	914220	5811.TGME49_049180	5811.TGME49_019700	0	0	0	0	0.999	0	0	0.544	0.999
TGME49_050830	TGME49_039500	916459	915683	5811.TGME49_050830	5811.TGME49_039500	0	0	0	0	0.632	0.981	0.501	0.534	0.998
TGME49_099050	TGME49_012290	919505	913637	5811.TGME49_099050	5811.TGME49_012290	0.045	0	0	0	0.968	0.9	0.501	0.314	0.998
TGME49_099050	TGME49_063050	919505	917318	5811.TGME49_099050	5811.TGME49_063050	0	0	0	0	0.968	0.9	0.501	0.108	0.998
TGME49_099050	TGME49_003630	919505	913064	5811.TGME49_099050	5811.TGME49_003630	0	0	0	0	0.968	0.702	0.501	0.314	0.996
TGME49_109810	TGME49_099050	919960	919505	5811.TGME49_109810	5811.TGME49_099050	0.061	0	0	0	0.968	0.516	0.501	0.526	0.995
TGME49_050830	TGME49_023590	916459	914487	5811.TGME49_050830	5811.TGME49_023590	0	0	0	0	0.632	0.953	0.501	0.491	0.995
TGME49_063050	TGME49_003630	917318	913064	5811.TGME49_063050	5811.TGME49_003630	0	0	0	0	0.968	0.516	0.501	0.509	0.995
TGME49_012290	TGME49_003630	913637	913064	5811.TGME49_012290	5811.TGME49_003630	0.064	0	0	0	0.968	0.516	0.501	0.314	0.994
TGME49_109810	TGME49_063050	919960	917318	5811.TGME49_109810	5811.TGME49_063050	0	0	0	0	0.968	0.684	0.501	0.064	0.994
TGME49_049180	TGME49_033140	916346	915255	5811.TGME49_049180	5811.TGME49_033140	0.094	0	0	0	0.806	0.15	0.927	0.606	0.994
TGME49_033110	TGME49_015260	915252	913861	5811.TGME49_033110	5811.TGME49_015260	0.136	0	0	0	0.981	0.095	0	0.607	0.993
TGME49_078050	TGME49_050830	918350	916459	5811.TGME49_078050	5811.TGME49_050830	0	0	0	0	0.329	0.981	0.501	0.116	0.993
TGME49_063050	TGME49_012290	917318	913637	5811.TGME49_063050	5811.TGME49_012290	0	0	0	0	0.968	0.564	0.501	0.074	0.992
TGME49_118310	TGME49_029360	920606	914962	5811.TGME49_118310	5811.TGME49_029360	0.381	0	0	0	0.481	0.339	0.927	0.606	0.992
TGME49_109810	TGME49_003630	919960	913064	5811.TGME49_109810	5811.TGME49_003630	0	0	0	0	0.968	0.516	0.501	0.105	0.992
TGME49_049180	TGME49_034190	916346	915330	5811.TGME49_049180	5811.TGME49_034190	0.108	0	0	0	0.242	0.078	0.959	0.607	0.988
TGME49_057350	TGME49_050770	916884	916453	5811.TGME49_057350	5811.TGME49_050770	0	0	0	0	0.072	0.706	0.895	0.606	0.987
TGME49_079450	TGME49_033110	918463	915252	5811.TGME49_079450	5811.TGME49_033110	0.606	0	0	0	0.235	0	0.9	0.607	0.986
TGME49_109810	TGME49_012290	919960	913637	5811.TGME49_109810	5811.TGME49_012290	0.123	0	0	0	0.912	0.618	0.501	0.128	0.984
TGME49_089680	TGME49_066830	918965	917607	5811.TGME49_089680	5811.TGME49_066830	0	0	0	0	0	0.891	0.605	0.606	0.981
TGME49_029210	TGME49_005470	914947	913197	5811.TGME49_029210	5811.TGME49_005470	0	0	0	0	0.042	0.943	0.501	0.401	0.981
TGME49_120430	TGME49_005470	920736	913197	5811.TGME49_120430	5811.TGME49_005470	0	0	0	0	0.195	0.946	0.501	0.085	0.977
TGME49_091140	TGME49_039410	919070	915675	5811.TGME49_091140	5811.TGME49_039410	0	0	0	0	0.16	0.877	0.501	0.606	0.976
TGME49_096010	TGME49_089680	919385	918965	5811.TGME49_096010	5811.TGME49_089680	0	0	0	0	0	0.929	0.307	0.554	0.976
TGME49_082140	TGME49_029210	918573	914947	5811.TGME49_082140	5811.TGME49_029210	0	0	0	0	0	0.902	0.501	0.543	0.975
TGME49_082140	TGME49_005470	918573	913197	5811.TGME49_082140	5811.TGME49_005470	0	0	0	0	0.065	0.945	0.501	0.108	0.974
TGME49_118310	TGME49_036040	920606	915460	5811.TGME49_118310	5811.TGME49_036040	0.381	0	0	0	0.068	0.105	0.927	0.385	0.972
TGME49_096010	TGME49_030490	919385	915042	5811.TGME49_096010	5811.TGME49_030490	0	0	0	0	0.098	0.172	0.9	0.605	0.966
TGME49_063580	TGME49_050830	917371	916459	5811.TGME49_063580	5811.TGME49_050830	0	0	0	0	0.067	0.885	0.501	0.404	0.963
TGME49_084190	TGME49_056760	918629	916836	5811.TGME49_084190	5811.TGME49_056760	0	0	0	0	0.096	0.273	0.921	0.38	0.963
TGME49_121520	TGME49_088380	920792	918850	5811.TGME49_121520	5811.TGME49_088380	0	0	0	0	0.347	0.725	0.501	0.606	0.959
TGME49_121520	TGME49_092920	920792	919157	5811.TGME49_121520	5811.TGME49_092920	0	0	0	0	0.347	0.725	0.501	0.606	0.959
TGME49_049180	TGME49_015260	916346	913861	5811.TGME49_049180	5811.TGME49_015260	0.615	0	0	0	0.162	0.078	0.605	0.665	0.953
TGME49_104680	TGME49_095340	919667	919338	5811.TGME49_104680	5811.TGME49_095340	0	0	0	0	0.043	0.886	0	0.589	0.951
TGME49_089650	TGME49_056760	918962	916836	5811.TGME49_089650	5811.TGME49_056760	0.058	0	0	0	0.044	0	0.9	0.525	0.951
TGME49_118310	TGME49_056760	920606	916836	5811.TGME49_118310	5811.TGME49_056760	0.381	0	0	0	0.135	0.12	0.8	0.555	0.95
TGME49_099050	TGME49_005470	919505	913197	5811.TGME49_099050	5811.TGME49_005470	0.381	0	0	0	0.824	0.098	0.307	0.314	0.944
TGME49_095340	TGME49_080490	919338	918480	5811.TGME49_095340	5811.TGME49_080490	0	0	0	0	0.113	0.844	0.181	0.544	0.941
TGME49_064690	TGME49_049260	917443	916354	5811.TGME49_064690	5811.TGME49_049260	0	0	0	0	0.044	0.841	0.307	0.511	0.941
TGME49_057350	TGME49_024850	916884	914601	5811.TGME49_057350	5811.TGME49_024850	0	0	0	0	0.194	0.671	0.501	0.606	0.94
TGME49_069180	TGME49_024850	917798	914601	5811.TGME49_069180	5811.TGME49_024850	0	0	0	0	0.194	0.671	0.501	0.606	0.94
TGME49_069180	TGME49_050770	917798	916453	5811.TGME49_069180	5811.TGME49_050770	0	0	0	0	0.072	0.706	0.501	0.606	0.939
TGME49_067330	TGME49_032350	917646	915187	5811.TGME49_067330	5811.TGME49_032350	0.615	0	0	0	0.114	0	0.605	0.607	0.939
TGME49_078830	TGME49_029360	918428	914962	5811.TGME49_078830	5811.TGME49_029360	0.615	0	0	0	0.308	0.317	0.235	0.607	0.935
TGME49_078830	TGME49_056760	918428	916836	5811.TGME49_078830	5811.TGME49_056760	0.186	0	0	0	0.095	0	0.8	0.607	0.934
TGME49_056760	TGME49_036040	916836	915460	5811.TGME49_056760	5811.TGME49_036040	0.079	0	0	0	0.166	0.105	0.8	0.564	0.929
TGME49_118310	TGME49_105030	920606	919693	5811.TGME49_118310	5811.TGME49_105030	0.056	0	0	0	0.067	0	0.915	0.158	0.928
TGME49_097060	TGME49_044150	919397	915998	5811.TGME49_097060	5811.TGME49_044150	0	0	0	0	0	0	0.927	0	0.927
TGME49_048340	TGME49_023540	916275	914482	5811.TGME49_048340	5811.TGME49_023540	0	0	0	0	0.043	0.681	0.501	0.579	0.927
TGME49_073370	TGME49_073070	918126	918106	5811.TGME49_073370	5811.TGME49_073070	0	0	0	0	0.163	0.679	0.501	0.513	0.925
TGME49_039500	TGME49_024330	915683	914560	5811.TGME49_039500	5811.TGME49_024330	0	0	0	0	0.069	0.692	0.501	0.537	0.924
TGME49_097060	TGME49_036040	919397	915460	5811.TGME49_097060	5811.TGME49_036040	0.068	0	0	0	0.161	0.15	0.8	0.518	0.924
TGME49_053730	TGME49_048340	916635	916275	5811.TGME49_053730	5811.TGME49_048340	0	0	0	0	0.119	0.826	0	0.539	0.923
TGME49_100150	TGME49_070530	919557	917906	5811.TGME49_100150	5811.TGME49_070530	0	0	0	0	0.226	0.812	0	0.517	0.923
TGME49_056760	TGME49_029360	916836	914962	5811.TGME49_056760	5811.TGME49_029360	0.126	0	0	0	0.067	0	0.8	0.588	0.923
TGME49_084190	TGME49_015260	918629	913861	5811.TGME49_084190	5811.TGME49_015260	0.057	0	0	0.609	0	0.914	0	0.241	0.922
TGME49_120430	TGME49_029210	920736	914947	5811.TGME49_120430	5811.TGME49_029210	0	0	0	0	0.098	0.842	0.501	0	0.922
TGME49_036040	TGME49_029360	915460	914962	5811.TGME49_036040	5811.TGME49_029360	0.057	0	0	0	0.073	0.111	0.9	0.14	0.92
TGME49_093180	TGME49_049390	919173	916367	5811.TGME49_093180	5811.TGME49_049390	0.054	0	0	0	0.042	0.108	0.8	0.557	0.915
TGME49_089650	TGME49_084190	918962	918629	5811.TGME49_089650	5811.TGME49_084190	0	0	0	0	0	0	0.9	0.156	0.911
TGME49_097060	TGME49_078830	919397	918428	5811.TGME49_097060	5811.TGME49_078830	0.099	0	0	0	0.098	0.105	0.8	0.461	0.907
TGME49_094550	TGME49_027650	919277	914840	5811.TGME49_094550	5811.TGME49_027650	0	0	0	0	0.044	0.582	0.485	0.595	0.905
TGME49_017460	TGME49_005710	914051	913221	5811.TGME49_017460	5811.TGME49_005710	0.182	0	0	0	0.295	0.495	0.299	0.605	0.904
TGME49_080660	TGME49_048340	918497	916275	5811.TGME49_080660	5811.TGME49_048340	0	0	0	0	0.069	0.691	0.245	0.606	0.902
TGME49_048340	TGME49_013900	916275	913748	5811.TGME49_048340	5811.TGME49_013900	0	0	0	0	0.069	0.691	0.245	0.606	0.902
TGME49_086240	TGME49_048340	918743	916275	5811.TGME49_086240	5811.TGME49_048340	0	0	0	0	0.069	0.691	0.245	0.606	0.902
TGME49_029180	TGME49_023540	914944	914482	5811.TGME49_029180	5811.TGME49_023540	0	0	0	0	0.302	0.67	0	0.604	0.9
TGME49_090720	TGME49_083830	919038	918614	5811.TGME49_090720	5811.TGME49_083830	0.046	0	0	0	0	0	0.9	0	0.9
TGME49_056760	TGME49_046630	916836	916145	5811.TGME49_056760	5811.TGME49_046630	0	0	0	0	0	0	0.9	0	0.9
TGME49_083830	TGME49_046560	918614	916138	5811.TGME49_083830	5811.TGME49_046560	0	0	0	0	0	0	0.9	0	0.9
TGME49_104970	TGME49_064690	919687	917443	5811.TGME49_104970	5811.TGME49_064690	0	0	0	0	0.066	0.719	0.207	0.57	0.898
TGME49_079450	TGME49_015260	918463	913861	5811.TGME49_079450	5811.TGME49_015260	0.596	0	0	0	0.243	0	0	0.664	0.888
TGME49_078830	TGME49_036040	918428	915460	5811.TGME49_078830	5811.TGME49_036040	0.042	0	0	0	0.067	0	0.8	0.445	0.887
TGME49_069180	TGME49_011020	917798	913550	5811.TGME49_069180	5811.TGME49_011020	0	0	0	0	0.067	0.515	0.501	0.543	0.883
TGME49_057350	TGME49_011020	916884	913550	5811.TGME49_057350	5811.TGME49_011020	0	0	0	0	0.067	0.515	0.501	0.543	0.883
TGME49_048340	TGME49_029180	916275	914944	5811.TGME49_048340	5811.TGME49_029180	0	0	0	0	0.097	0.716	0	0.577	0.882
TGME49_043440	TGME49_036970	915937	915520	5811.TGME49_043440	5811.TGME49_036970	0	0	0	0	0.127	0.452	0.501	0.555	0.879
TGME49_073370	TGME49_032190	918126	915171	5811.TGME49_073370	5811.TGME49_032190	0	0	0	0	0.334	0.391	0.501	0.461	0.876
TGME49_073070	TGME49_025310	918106	914646	5811.TGME49_073070	5811.TGME49_025310	0	0	0	0.779	0.095	0.713	0.501	0.592	0.876
TGME49_118310	TGME49_078830	920606	918428	5811.TGME49_118310	5811.TGME49_078830	0.615	0	0	0	0.125	0.177	0	0.607	0.876
TGME49_080490	TGME49_070530	918480	917906	5811.TGME49_080490	5811.TGME49_070530	0	0	0	0	0.097	0.679	0	0.606	0.875
TGME49_106220	TGME49_029210	919780	914947	5811.TGME49_106220	5811.TGME49_029210	0	0	0	0	0.042	0.586	0.501	0.447	0.875
TGME49_051690	TGME49_015260	916504	913861	5811.TGME49_051690	5811.TGME49_015260	0.154	0	0	0	0.131	0.724	0	0.459	0.875
TGME49_049180	TGME49_014970	916346	913834	5811.TGME49_049180	5811.TGME49_014970	0	0	0	0	0.804	0	0	0.393	0.875
TGME49_050770	TGME49_005470	916453	913197	5811.TGME49_050770	5811.TGME49_005470	0.058	0	0	0	0.243	0.465	0.486	0.457	0.874
TGME49_110190	TGME49_028690	919997	914923	5811.TGME49_110190	5811.TGME49_028690	0	0	0	0	0.113	0.687	0.307	0.398	0.868
TGME49_109210	TGME49_011680	919921	913596	5811.TGME49_109210	5811.TGME49_011680	0.381	0	0	0	0.097	0.613	0.307	0.258	0.868
TGME49_043990	TGME49_030690	915982	915062	5811.TGME49_043990	5811.TGME49_030690	0	0	0	0	0.093	0.394	0.501	0.577	0.868
TGME49_056760	TGME49_032350	916836	915187	5811.TGME49_056760	5811.TGME49_032350	0.105	0	0	0	0.109	0.322	0.307	0.7	0.867
TGME49_015260	TGME49_001380	913861	912873	5811.TGME49_015260	5811.TGME49_001380	0.588	0	0	0	0.098	0	0	0.666	0.865
TGME49_088380	TGME49_073960	918850	918184	5811.TGME49_088380	5811.TGME49_073960	0	0	0	0	0.637	0.116	0	0.606	0.862
TGME49_092920	TGME49_073960	919157	918184	5811.TGME49_092920	5811.TGME49_073960	0	0	0	0	0.637	0.116	0	0.606	0.862
TGME49_120430	TGME49_050770	920736	916453	5811.TGME49_120430	5811.TGME49_050770	0	0	0	0	0.044	0.721	0.501	0.09	0.862
TGME49_093180	TGME49_089650	919173	918962	5811.TGME49_093180	5811.TGME49_089650	0	0	0	0	0.24	0	0.8	0.154	0.86
TGME49_047250	TGME49_036970	916186	915520	5811.TGME49_047250	5811.TGME49_036970	0	0	0	0	0.198	0.561	0.336	0.461	0.857
TGME49_089650	TGME49_049390	918962	916367	5811.TGME49_089650	5811.TGME49_049390	0.047	0	0	0	0.226	0	0.8	0.119	0.852
TGME49_024850	TGME49_011020	914601	913550	5811.TGME49_024850	5811.TGME49_011020	0	0	0	0	0.073	0.275	0.501	0.605	0.849
TGME49_056980	TGME49_049180	916858	916346	5811.TGME49_056980	5811.TGME49_049180	0.615	0	0	0	0.071	0	0	0.607	0.847
TGME49_104760	TGME49_036910	919675	915514	5811.TGME49_104760	5811.TGME49_036910	0	0	0	0	0.085	0.429	0.501	0.48	0.846
TGME49_034190	TGME49_015260	915330	913861	5811.TGME49_034190	5811.TGME49_015260	0.118	0	0	0	0.167	0	0.605	0.528	0.844
TGME49_015260	TGME49_013060	913861	913676	5811.TGME49_015260	5811.TGME49_013060	0.615	0	0	0	0	0	0	0.605	0.841
TGME49_073960	TGME49_033110	918184	915252	5811.TGME49_073960	5811.TGME49_033110	0.599	0	0	0	0.073	0	0	0.606	0.84
TGME49_106220	TGME49_082140	919780	918573	5811.TGME49_106220	5811.TGME49_082140	0	0	0	0	0.112	0.438	0.501	0.43	0.839
TGME49_104760	TGME49_082140	919675	918573	5811.TGME49_104760	5811.TGME49_082140	0	0	0	0	0	0.683	0.488	0.087	0.838
TGME49_050770	TGME49_024850	916453	914601	5811.TGME49_050770	5811.TGME49_024850	0	0	0	0	0.17	0.207	0.501	0.562	0.836
TGME49_093180	TGME49_084190	919173	918629	5811.TGME49_093180	5811.TGME49_084190	0	0	0	0	0.066	0	0.8	0.197	0.836
TGME49_120430	TGME49_082140	920736	918573	5811.TGME49_120430	5811.TGME49_082140	0	0	0	0	0.163	0.633	0.501	0.052	0.835
TGME49_019540	TGME49_017460	914206	914051	5811.TGME49_019540	5811.TGME49_017460	0.17	0	0	0	0.222	0.438	0	0.599	0.835
TGME49_081580	TGME49_033010	918540	915242	5811.TGME49_081580	5811.TGME49_033010	0	0	0	0	0	0.544	0.334	0.498	0.834
TGME49_067100	TGME49_033010	917634	915242	5811.TGME49_067100	5811.TGME49_033010	0	0	0	0	0	0.544	0.334	0.498	0.834
TGME49_033010	TGME49_008500	915242	913377	5811.TGME49_033010	5811.TGME49_008500	0	0	0	0	0.044	0.544	0.334	0.498	0.834
TGME49_091980	TGME49_080490	919112	918480	5811.TGME49_091980	5811.TGME49_080490	0	0	0	0	0.163	0.392	0.274	0.606	0.834
TGME49_039250	TGME49_030690	915659	915062	5811.TGME49_039250	5811.TGME49_030690	0	0	0	0	0.162	0	0.8	0.089	0.833
TGME49_089650	TGME49_033110	918962	915252	5811.TGME49_089650	5811.TGME49_033110	0.051	0	0	0	0.097	0	0.605	0.558	0.83
TGME49_095340	TGME49_031190	919338	915102	5811.TGME49_095340	5811.TGME49_031190	0	0	0	0	0	0.697	0	0.461	0.829
TGME49_097060	TGME49_029360	919397	914962	5811.TGME49_097060	5811.TGME49_029360	0.062	0	0	0	0.091	0	0.8	0.113	0.828
TGME49_095340	TGME49_012290	919338	913637	5811.TGME49_095340	5811.TGME49_012290	0	0	0	0	0.241	0.696	0.307	0.051	0.827
TGME49_091140	TGME49_004410	919070	913132	5811.TGME49_091140	5811.TGME49_004410	0	0	0	0	0.129	0.704	0.307	0.135	0.824
TGME49_118310	TGME49_097060	920606	919397	5811.TGME49_118310	5811.TGME49_097060	0	0	0	0	0.068	0	0.8	0.131	0.823
TGME49_084190	TGME49_049390	918629	916367	5811.TGME49_084190	5811.TGME49_049390	0	0	0	0	0	0.078	0.8	0.087	0.816
TGME49_050770	TGME49_011690	916453	913597	5811.TGME49_050770	5811.TGME49_011690	0.056	0	0	0	0.094	0.326	0.501	0.459	0.816
TGME49_118440	TGME49_050770	920619	916453	5811.TGME49_118440	5811.TGME49_050770	0	0	0	0	0.114	0.276	0.464	0.522	0.813
TGME49_084050	TGME49_050770	918625	916453	5811.TGME49_084050	5811.TGME49_050770	0	0	0	0	0.114	0.276	0.464	0.522	0.813
TGME49_069700	TGME49_049260	917838	916354	5811.TGME49_069700	5811.TGME49_049260	0	0	0	0	0	0.108	0.501	0.606	0.809
TGME49_051810	TGME49_015260	916514	913861	5811.TGME49_051810	5811.TGME49_015260	0.615	0	0	0	0.095	0	0	0.488	0.806
TGME49_024850	TGME49_011690	914601	913597	5811.TGME49_024850	5811.TGME49_011690	0	0	0	0	0.042	0.114	0.501	0.593	0.804
TGME49_050340	TGME49_035470	916440	915413	5811.TGME49_050340	5811.TGME49_035470	0	0	0	0	0	0.501	0.334	0.459	0.804
TGME49_097060	TGME49_056760	919397	916836	5811.TGME49_097060	5811.TGME49_056760	0.056	0	0	0	0.39	0	0.235	0.606	0.803
TGME49_118690	TGME49_051480	920643	916483	5811.TGME49_118690	5811.TGME49_051480	0	0	0	0	0.803	0	0	0	0.803
TGME49_090660	TGME49_036540	919032	915488	5811.TGME49_090660	5811.TGME49_036540	0	0	0	0	0.043	0.078	0.501	0.602	0.801
TGME49_095340	TGME49_050830	919338	916459	5811.TGME49_095340	5811.TGME49_050830	0	0	0	0	0.073	0.511	0.307	0.434	0.798
TGME49_053730	TGME49_029180	916635	914944	5811.TGME49_053730	5811.TGME49_029180	0	0	0	0	0.241	0.39	0	0.6	0.798
TGME49_092920	TGME49_065310	919157	917505	5811.TGME49_092920	5811.TGME49_065310	0	0	0	0	0.308	0.286	0	0.605	0.787
TGME49_088380	TGME49_065310	918850	917505	5811.TGME49_088380	5811.TGME49_065310	0	0	0	0	0.308	0.286	0	0.605	0.787
TGME49_069180	TGME49_014270	917798	913776	5811.TGME49_069180	5811.TGME49_014270	0	0	0	0	0.197	0	0.491	0.519	0.786
TGME49_057350	TGME49_014270	916884	913776	5811.TGME49_057350	5811.TGME49_014270	0	0	0	0	0.197	0	0.491	0.519	0.786
TGME49_104760	TGME49_069180	919675	917798	5811.TGME49_104760	5811.TGME49_069180	0	0	0	0	0.098	0.667	0.307	0.082	0.783
TGME49_104760	TGME49_057350	919675	916884	5811.TGME49_104760	5811.TGME49_057350	0	0	0	0	0.098	0.667	0.307	0.082	0.783
TGME49_065010	TGME49_015260	917475	913861	5811.TGME49_065010	5811.TGME49_015260	0.094	0	0	0	0.081	0.346	0.605	0.129	0.778
TGME49_106220	TGME49_060200	919780	917106	5811.TGME49_106220	5811.TGME49_060200	0	0	0	0	0.067	0.286	0.501	0.407	0.776
TGME49_100260	TGME49_019540	919568	914206	5811.TGME49_100260	5811.TGME49_019540	0.055	0	0	0	0.308	0.275	0	0.583	0.775
TGME49_050770	TGME49_014270	916453	913776	5811.TGME49_050770	5811.TGME49_014270	0.072	0	0	0	0.073	0.078	0.478	0.539	0.774
TGME49_065330	TGME49_008500	917507	913377	5811.TGME49_065330	5811.TGME49_008500	0.381	0	0	0	0.073	0.299	0.297	0.314	0.77
TGME49_067100	TGME49_065330	917634	917507	5811.TGME49_067100	5811.TGME49_065330	0.381	0	0	0	0.073	0.299	0.297	0.314	0.77
TGME49_057350	TGME49_011690	916884	913597	5811.TGME49_057350	5811.TGME49_011690	0	0	0	0	0.115	0	0.501	0.523	0.77
TGME49_071100	TGME49_020490	917963	914279	5811.TGME49_071100	5811.TGME49_020490	0	0	0	0	0.757	0.095	0	0	0.77
TGME49_081580	TGME49_065330	918540	917507	5811.TGME49_081580	5811.TGME49_065330	0.381	0	0	0	0.073	0.299	0.297	0.314	0.77
TGME49_069180	TGME49_011690	917798	913597	5811.TGME49_069180	5811.TGME49_011690	0	0	0	0	0.115	0	0.501	0.523	0.77
TGME49_112530	TGME49_104760	920207	919675	5811.TGME49_112530	5811.TGME49_104760	0	0	0	0	0.073	0.506	0	0.535	0.768
TGME49_099050	TGME49_005560	919505	913206	5811.TGME49_099050	5811.TGME49_005560	0	0	0	0	0.691	0.274	0	0	0.766
TGME49_092920	TGME49_015260	919157	913861	5811.TGME49_092920	5811.TGME49_015260	0	0	0	0	0.098	0.515	0	0.507	0.765
TGME49_088380	TGME49_015260	918850	913861	5811.TGME49_088380	5811.TGME49_015260	0	0	0	0	0.098	0.515	0	0.507	0.765
TGME49_091140	TGME49_029210	919070	914947	5811.TGME49_091140	5811.TGME49_029210	0	0	0	0	0.072	0.639	0.3	0.112	0.763
TGME49_065330	TGME49_032340	917507	915186	5811.TGME49_065330	5811.TGME49_032340	0.381	0	0	0	0.073	0.277	0.297	0.314	0.763
TGME49_055190	TGME49_050340	916761	916440	5811.TGME49_055190	5811.TGME49_050340	0	0	0	0	0	0.501	0.334	0.343	0.762
TGME49_095340	TGME49_050340	919338	916440	5811.TGME49_095340	5811.TGME49_050340	0	0	0	0	0	0.481	0.501	0.155	0.762
TGME49_078050	TGME49_024330	918350	914560	5811.TGME49_078050	5811.TGME49_024330	0	0	0	0	0.067	0.486	0.501	0.112	0.759
TGME49_073370	TGME49_025310	918126	914646	5811.TGME49_073370	5811.TGME49_025310	0	0	0	0	0.241	0.373	0.501	0.106	0.759
TGME49_048830	TGME49_030490	916323	915042	5811.TGME49_048830	5811.TGME49_030490	0	0	0	0	0.07	0.416	0	0.592	0.759
TGME49_048340	TGME49_009130	916275	913420	5811.TGME49_048340	5811.TGME49_009130	0	0	0	0	0.067	0.661	0.204	0.146	0.756
TGME49_113860	TGME49_048340	920328	916275	5811.TGME49_113860	5811.TGME49_048340	0	0	0	0	0.067	0.661	0.204	0.146	0.756
TGME49_060200	TGME49_050770	917106	916453	5811.TGME49_060200	5811.TGME49_050770	0	0	0	0	0.114	0.276	0.307	0.512	0.754
TGME49_106220	TGME49_104760	919780	919675	5811.TGME49_106220	5811.TGME49_104760	0	0	0	0	0.067	0.603	0.34	0.11	0.753
TGME49_089680	TGME49_032190	918965	915171	5811.TGME49_089680	5811.TGME49_032190	0	0	0	0	0	0.631	0.307	0.11	0.752
TGME49_019540	TGME49_015260	914206	913861	5811.TGME49_019540	5811.TGME49_015260	0.155	0	0	0	0.22	0.286	0	0.534	0.751
TGME49_104760	TGME49_005470	919675	913197	5811.TGME49_104760	5811.TGME49_005470	0	0	0	0	0.067	0.484	0.501	0.084	0.75
TGME49_017460	TGME49_015260	914051	913861	5811.TGME49_017460	5811.TGME49_015260	0.122	0	0	0	0.161	0.398	0	0.501	0.749
TGME49_109810	TGME49_051810	919960	916514	5811.TGME49_109810	5811.TGME49_051810	0	0	0	0	0.712	0.078	0	0.119	0.745
TGME49_053730	TGME49_023540	916635	914482	5811.TGME49_053730	5811.TGME49_023540	0	0	0	0	0.106	0.425	0	0.541	0.743
TGME49_050340	TGME49_049320	916440	916360	5811.TGME49_050340	5811.TGME49_049320	0	0	0	0	0.042	0.633	0.289	0.088	0.741
TGME49_051810	TGME49_003630	916514	913064	5811.TGME49_051810	5811.TGME49_003630	0	0	0	0	0.638	0	0	0.314	0.741
TGME49_084050	TGME49_005470	918625	913197	5811.TGME49_084050	5811.TGME49_005470	0	0	0	0	0.071	0.447	0.501	0.107	0.74
TGME49_118440	TGME49_005470	920619	913197	5811.TGME49_118440	5811.TGME49_005470	0	0	0	0	0.071	0.447	0.501	0.107	0.74
TGME49_063050	TGME49_014270	917318	913776	5811.TGME49_063050	5811.TGME49_014270	0	0	0	0	0.066	0.485	0.501	0	0.739
TGME49_095340	TGME49_070530	919338	917906	5811.TGME49_095340	5811.TGME49_070530	0	0	0	0	0.067	0.254	0.307	0.518	0.736
TGME49_084050	TGME49_082140	918625	918573	5811.TGME49_084050	5811.TGME49_082140	0	0	0	0	0	0.48	0.501	0.064	0.735
TGME49_118440	TGME49_082140	920619	918573	5811.TGME49_118440	5811.TGME49_082140	0	0	0	0	0	0.48	0.501	0.064	0.735
TGME49_115670	TGME49_033010	920477	915242	5811.TGME49_115670	5811.TGME49_033010	0	0	0	0	0.072	0.078	0.501	0.453	0.735
TGME49_104760	TGME49_036540	919675	915488	5811.TGME49_104760	5811.TGME49_036540	0	0	0	0	0.097	0	0.501	0.456	0.733
TGME49_082140	TGME49_060200	918573	917106	5811.TGME49_082140	5811.TGME49_060200	0	0	0	0	0.067	0.48	0.479	0.064	0.731
TGME49_049180	TGME49_013060	916346	913676	5811.TGME49_049180	5811.TGME49_013060	0.236	0	0	0	0	0	0.29	0.543	0.73
TGME49_109810	TGME49_005470	919960	913197	5811.TGME49_109810	5811.TGME49_005470	0	0	0	0	0.325	0.092	0.274	0.461	0.728
TGME49_064860	TGME49_014090	917460	913758	5811.TGME49_064860	5811.TGME49_014090	0	0	0	0	0.133	0.492	0	0.429	0.726
TGME49_051810	TGME49_048340	916514	916275	5811.TGME49_051810	5811.TGME49_048340	0	0	0	0	0.243	0.649	0	0	0.722
TGME49_120430	TGME49_060200	920736	917106	5811.TGME49_120430	5811.TGME49_060200	0	0	0	0	0.186	0.364	0.49	0.074	0.722
TGME49_080560	TGME49_032350	918487	915187	5811.TGME49_080560	5811.TGME49_032350	0.056	0	0	0	0.095	0.272	0	0.605	0.721
TGME49_113670	TGME49_089680	920310	918965	5811.TGME49_113670	5811.TGME49_089680	0	0	0	0	0	0.596	0.301	0.089	0.72
TGME49_011690	TGME49_011020	913597	913550	5811.TGME49_011690	5811.TGME49_011020	0	0	0	0	0.043	0.101	0.501	0.426	0.72
TGME49_073070	TGME49_032190	918106	915171	5811.TGME49_073070	5811.TGME49_032190	0	0	0	0	0.114	0.081	0.501	0.391	0.719
TGME49_120430	TGME49_064130	920736	917416	5811.TGME49_120430	5811.TGME49_064130	0	0	0	0	0.133	0.687	0	0.05	0.719
TGME49_104760	TGME49_029210	919675	914947	5811.TGME49_104760	5811.TGME49_029210	0	0	0	0	0	0.432	0.501	0.087	0.718
TGME49_039410	TGME49_004410	915675	913132	5811.TGME49_039410	5811.TGME49_004410	0	0	0	0	0.073	0.564	0.307	0.109	0.717
TGME49_095340	TGME49_022430	919338	914422	5811.TGME49_095340	5811.TGME49_022430	0	0	0	0	0	0.557	0.307	0.149	0.715
TGME49_095340	TGME49_094280	919338	919260	5811.TGME49_095340	5811.TGME49_094280	0	0	0	0	0	0.557	0.307	0.149	0.715
TGME49_095340	TGME49_091980	919338	919112	5811.TGME49_095340	5811.TGME49_091980	0	0	0	0	0	0.557	0.307	0.149	0.715
TGME49_063050	TGME49_033110	917318	915252	5811.TGME49_063050	5811.TGME49_033110	0	0	0	0	0.159	0.675	0	0	0.714
TGME49_065330	TGME49_063580	917507	917371	5811.TGME49_065330	5811.TGME49_063580	0.058	0	0	0	0.066	0.364	0.501	0.129	0.712
TGME49_050770	TGME49_011020	916453	913550	5811.TGME49_050770	5811.TGME49_011020	0	0	0	0	0.072	0.349	0.501	0.155	0.711
TGME49_065310	TGME49_015260	917505	913861	5811.TGME49_065310	5811.TGME49_015260	0.615	0	0	0	0.073	0.199	0	0.109	0.711
TGME49_091330	TGME49_050770	919079	916453	5811.TGME49_091330	5811.TGME49_050770	0	0	0	0	0.067	0.55	0.303	0.13	0.711
TGME49_120430	TGME49_118440	920736	920619	5811.TGME49_120430	5811.TGME49_118440	0	0	0	0	0.124	0.364	0.501	0.074	0.708
TGME49_099050	TGME49_014270	919505	913776	5811.TGME49_099050	5811.TGME49_014270	0	0	0	0	0.217	0	0.501	0.314	0.708
TGME49_120430	TGME49_084050	920736	918625	5811.TGME49_120430	5811.TGME49_084050	0	0	0	0	0.124	0.364	0.501	0.074	0.708
TGME49_091330	TGME49_029180	919079	914944	5811.TGME49_091330	5811.TGME49_029180	0	0	0	0	0.044	0.703	0	0.051	0.707
TGME49_089680	TGME49_055190	918965	916761	5811.TGME49_089680	5811.TGME49_055190	0	0	0	0	0.042	0.525	0.339	0.139	0.706
TGME49_089680	TGME49_035470	918965	915413	5811.TGME49_089680	5811.TGME49_035470	0	0	0	0	0.042	0.525	0.339	0.139	0.706
TGME49_089680	TGME49_063180	918965	917331	5811.TGME49_089680	5811.TGME49_063180	0	0	0	0	0.042	0.525	0.339	0.139	0.706
TGME49_114780	TGME49_089680	920400	918965	5811.TGME49_114780	5811.TGME49_089680	0	0	0	0	0.042	0.525	0.339	0.139	0.706
TGME49_095340	TGME49_049480	919338	916376	5811.TGME49_095340	5811.TGME49_049480	0	0	0	0	0	0.558	0.307	0.112	0.704
TGME49_005470	TGME49_002850	913197	912987	5811.TGME49_005470	5811.TGME49_002850	0	0	0	0	0	0.166	0.501	0.34	0.701
TGME49_100260	TGME49_099050	919568	919505	5811.TGME49_100260	5811.TGME49_099050	0	0	0	0	0.098	0.383	0.307	0.314	0.7
TGME49_033110	TGME49_019540	915252	914206	5811.TGME49_033110	5811.TGME49_019540	0.095	0	0	0	0.198	0.078	0	0.605	0.7

## Sheet: Supp Data 1.7
Supplementary Data 1.7: TMT labeling details for the quantitative phosphoproteomic analysis of TgCDPK7 parasites
TMT labeling details for CDPK7-iKO T. gondii parasites
Replicates	CDPK7-iKO wild type	CDPK7-iKO parasites
Biological replicate 1	TMT channels 126 and 127 (technical replicates)	TMT channels 130 and 131 (technical replicates)
Biological replicate 2	TMT channels 126 and 127 (technical replicates)	TMT channels 130 and 131 (technical replicates)
Biological replicate 3	TMT channel 128N	TMT channel 130N
Biological replicate 4	TMT channel 130C	TMT channel 128C
Biological replicate 5	TMT channel 129N	TMT channel 131
